# Supplementary material for: Transcriptional Inactivation of TP53 and the BMP Pathway Mediates Therapy-induced Dedifferentiation and Metastasis in Prostate Cancer
Source: bioRxiv preprint, doi:10.1101/2021.04.14.439569, version 2 (2021-04-19)
Supplement: Supplementary Table S5 [file 439569_file23.xlsx]

## Sheet: Integrated_topRank_ARPC_up
Query Name	Rank	TF	Score	Library	Overlapping_Genes
gene_set_query	1	NKX31	0.0006143	ARCHS4 Coexpression,6.143E-4	FOXA1,SPON2,MESP1,STEAP4,CPNE4,AMD1,CWH43,ARHGAP6,HOXA13,FGFRL1,SH3RF1,PPP3CA,NETO1,CREB3L4,PMEPA1,ZNF385B,MSMB,MCCC2,ABCC4,MME,SLC30A4,ACSL3,AR,AZGP1,TMEFF2,FOLH1,STEAP1,ACPP,STEAP2,ERGIC1,PDE9A,PLA1A,FKBP5,SLC22A3,NFIX,CHRNA2,ARHGEF26,MAOA,USP54,ABHD2,ENDOD1,KLK4,NEDD4L,TMPRSS2,KLK3,LPAR3,KLK2,GATA2,HOXB13,ACACA,MYO6,TRPM8,PDLIM5,PLEKHH1,TRPM4,SPDEF,ARHGEF37,HOMER2,DNASE2B,MBOAT2,TBX3,DHRS7,MLP…
gene_set_query	2	NR1I2	0.0007123	Enrichr Queries,7.123E-4	FOXA1,VIPR1,THRB,HPGD,IRS1,NEDD4L,TMPRSS2,IRS2,ADRB2,IQGAP2,GHR,TTR,CCND1,MYC,HMGCS2,GC,MME,HGD,HOMER2,GDF15,ZBTB16,EPHX2,IGF1,KLF15,TBX3,F5,GNMT,FKBP5
gene_set_query	3	AR	0.001229	ARCHS4 Coexpression,0.001229	FOXA1,SPON2,MESP1,AMD1,CWH43,OPLAH,ARHGAP6,HOXA13,FGFRL1,SH3RF1,NETO1,CREB3L4,ZNF649,PMEPA1,ZNF385B,NKX3-1,MCCC2,ABCC4,MME,SLC30A4,ACSL3,SLC22A23,AZGP1,FOLH1,STEAP1,ACPP,STEAP2,ERGIC1,PDE9A,PLA1A,SLC22A3,NFIX,CHRNA2,MAOA,USP54,ABHD2,HPN,ENDOD1,KLK4,NEDD4L,TMPRSS2,KLK3,KLK2,GATA2,HOXB13,ACACA,MYO6,TRPM8,NCAM2,PLEKHH1,SPDEF,SLC17A4,NPDC1,CGREF1,GLYATL1,ARHGEF37,HOMER2,IRX3,MBOAT2,ACADSB,TBX3,DHRS7,…
gene_set_query	4	HOXB13	0.001245	GTEx Coexpression,0.001245	FOXA1,SPON2,MESP1,CPNE4,AMD1,ARHGAP6,HOXA13,CREB3L4,PART1,POTEE,PMEPA1,NKX3-1,ABCC4,SLC30A4,NME3,SLC22A23,AR,ALDH1A3,AZGP1,TMEFF2,FOLH1,ACPP,STEAP2,ERGIC1,CHRNA2,KLK4,NEDD4L,TMPRSS2,KLK3,LPAR3,KLK2,GATA2,SCUBE2,SOCS2,CUX2,ANKH,TRPM8,TRPM4,SPDEF,NPDC1,GREB1,TBX3,DHRS7,MLPH,TRPV6,PI15,ZNF613,BMPR1B
gene_set_query	5	PPARA	0.001425	Enrichr Queries,0.001425	NFIX,THRB,IRS1,NEDD4L,IRS2,ADRB2,SLC4A4,CLU,IGF1R,GHR,CCND1,MYC,HMGCS2,GC,MME,GDF15,ZBTB16,EPHX2,IGF1,KLF15,DHRS3,ALDH6A1,BDH1,FASN,KLF9,CHPT1,FKBP5
gene_set_query	6	FOXA1	0.001843	ARCHS4 Coexpression,0.001843	SPON2,IRS1,ABHD2,KLK4,TMPRSS2,KLK3,KLK2,HOXB13,ACACA,SCUBE2,NETO1,CREB3L4,H2AFJ,MYO6,PMEPA1,TRPM8,SPDEF,NKX3-1,MSMB,MCCC2,HOMER2,IRX3,GREB1,ACSL3,RHOD,PRLR,TBX3,SLC22A23,AR,AZGP1,FOLH1,MLPH,FASN,STEAP1,ACPP,STEAP2,ERGIC1
gene_set_query	7	SPDEF	0.001867	GTEx Coexpression,0.001867	FOXA1,MESP1,CHRNA2,CPNE4,AMD1,KLK4,NEDD4L,TMPRSS2,KLK3,KLK2,GATA2,HOXB13,HOXA13,SCUBE2,SOCS2,KRTCAP3,CREB3L4,PART1,POTEE,PMEPA1,TRPM8,TRPM4,NKX3-1,NPDC1,GALNT7,ABCC4,GLYATL2,DNASE2B,ZG16B,SLC30A4,ACSL3,TBX3,SLC22A23,ALDH1A3,AZGP1,FOLH1,MLPH,TRPV6,PI15,ZNF613,ACPP,STEAP2,ERGIC1
gene_set_query	8	CREB3L4	0.002457	ARCHS4 Coexpression,0.002457	FOXA1,SPON2,CHRNA2,KLK4,TMPRSS2,KLK3,KLK2,GATA2,HOXB13,ACACA,SCUBE2,KRTCAP3,H2AFJ,MYO6,TRPM8,TRPM4,SPDEF,NKX3-1,NPDC1,GLYATL2,HOMER2,IRX3,GREB1,PRLR,AR,AZGP1,FOLH1,MLPH,FASN,ACPP,STEAP2,ERGIC1,PDE9A
gene_set_query	9	ELF5	0.002849	Enrichr Queries,0.002849	FOXA1,THRB,PSCA,HPGD,TMPRSS2,GATA2,AQP3,AKAP12,SOCS2,GHR,CCND1,MYC,PMEPA1,HMGCS2,SPDEF,MME,GDF15,ZBTB16,IRX3,IGF1,TBX3,ALDH1A3,AGTR1,BMPR1B,RAMP1
gene_set_query	10	EVX1	0.003111	GTEx Coexpression,0.003111	FOXA1,SPON2,CHRNA2,CPNE4,AMD1,KLK4,TMPRSS2,KLK3,KLK2,CROT,GATA2,HOXB13,HOXA13,SCUBE2,SOCS2,CREB3L4,TRPM8,SPDEF,NKX3-1,ABCC4,IDH1,SLC30A4,NME3,PRLR,TBX3,AR,ALDH1A3,FOLH1,MLPH,ZNF613,ACPP,STEAP2
gene_set_query	11	MLXIPL	0.003561	Enrichr Queries,0.003561	NFIX,THRB,IRS2,OPLAH,SLC4A4,CLU,AKAP12,SOCS2,GHR,TTR,CCND1,HMGCS2,GC,MME,GDF15,ZBTB16,EPHX2,IGF1,KLF15,DHRS3,FASN,TCEA3,KLF9,RHOU,FKBP5
gene_set_query	12	TBX3	0.003686	ARCHS4 Coexpression,0.003686	FOXA1,SPON2,NFIX,MAOA,IRS1,KLK4,TMPRSS2,KLK3,KLK2,GATA2,HOXB13,HOXA13,FGFRL1,ACACA,HOXA11,CCND1,NETO1,NKX3-1,MME,IL1R1,AR,FOLH1,STEAP1,STEAP2,ERGIC1
gene_set_query	13	ISL1	0.003734	GTEx Coexpression,0.003734	FOXA1,SPON2,CHRNA2,PSCA,AMD1,KLK4,NEDD4L,TMPRSS2,KLK3,KLK2,GATA2,HOXB13,HOXA13,SCUBE2,SOCS2,SLC25A27,KRTCAP3,CREB3L4,SPDEF,NKX3-1,NPDC1,SLC2A12,SLC30A4,NME3,PGC,AR,ALDH1A3,MLPH,SMO,TRPV6,ACPP,STEAP2
gene_set_query	14	KLF15	0.004274	Enrichr Queries,0.004274	CITED2,IRS1,SLC43A1,IRS2,ADRB2,SLC4A4,CLU,AKAP12,GHR,CCND1,MYC,HMGCS2,GC,MME,GDF15,ZBTB16,EPHX2,IGF1,DHRS3,ALDH6A1,FASN,TCEA3,KLF9,RHOU,FKBP5
gene_set_query	15	ERG	0.004914	ARCHS4 Coexpression,0.004914	SPON2,ABCC4,CHRNA2,HOMER2,AMD1,KLK4,TMPRSS2,KLK3,KLK2,GATA2,IQGAP2,BMX,HOXA10,SOCS2,AR,LATS2,TP53INP1,TRPM8,ZNF577,ACPP,STEAP2,ERGIC1,NKX3-1
gene_set_query	16	ZNF761	0.004978	GTEx Coexpression,0.004978	FOXA1,SPON2,MESP1,CHRNA2,CPNE4,AMD1,KLK4,TMPRSS2,KLK3,KLK2,GATA2,HOXB13,HOXA13,CREB3L4,TRPM8,SPDEF,NKX3-1,NPDC1,ABCC4,GREB1,SLC30A4,TBX3,ALDH1A3,FOLH1,MLPH,TRPV6,ZNF613,ZNF577,ACPP,STEAP2
gene_set_query	17	RORC	0.004986	Enrichr Queries,0.004986	HPGD,IRS2,ADRB2,IQGAP2,SLC4A4,CLU,SOCS2,GHR,CCND1,MYC,HMGCS2,GC,MME,IL1R1,GDF15,ZBTB16,EPHX2,KLF15,DHRS3,ALDH6A1,FASN,TCEA3,KLF9,RHOU,FKBP5
gene_set_query	18	MESP1	0.005528	ARCHS4 Coexpression,0.005528	SPON2,CGREF1,CHRNA2,HOMER2,DCXR,KLK4,TMPRSS2,KLK2,GATA2,HOXB13,AR,NUDT8,NETO1,CREB3L4,H2AFJ,MYO6,PMEPA1,ZNF385B,STEAP1,STEAP2,PDE9A,NKX3-1
gene_set_query	19	HOXA13	0.0056	GTEx Coexpression,0.0056	FOXA1,SPON2,CHRNA2,HPGD,AMD1,KLK4,TMPRSS2,KLK3,KLK2,GATA2,HOXB13,ARHGAP6,HOXA11,HOXA10,SOCS2,CREB3L4,TRPM8,TRPM4,SPDEF,NKX3-1,ABCC4,SLC30A4,UGT2B17,AR,PI15,ZNF613,ACPP,STEAP2,SLC26A3,PDE9A
gene_set_query	20	HOXC13	0.005698	Enrichr Queries,0.005698	FOXA1,DLX1,DLX2,MME,CITED2,GDF15,IRS1,ZBTB16,IRX3,IRS2,ADRB2,GATA2,HOXB13,HOXA13,TBX3,HOXA11,AKAP12,HOXA10,SOCS2,ALDH1A3,CCND1,MYC,PMEPA1
gene_set_query	21	GRHL2	0.006143	ARCHS4 Coexpression,0.006143	FOXA1,ARHGEF37,HOMER2,IRS1,ABHD2,GREB1,TMPRSS2,CWH43,KLK2,AQP3,RHOD,PRLR,ACACA,AR,FOLH1,MLPH,CREB3L4,MYO6,PMEPA1,STEAP2,SPDEF,NKX3-1
gene_set_query	22	GATA2	0.006223	GTEx Coexpression,0.006223	FOXA1,SPON2,VIPR1,CHRNA2,CPNE4,AMD1,KLK4,TMPRSS2,KLK3,KLK2,HOXB13,ARHGAP6,HOXA13,SOCS2,CREB3L4,TRPM8,SPDEF,NKX3-1,NPDC1,ANKRD29,SLC30A4,CYP4F8,TBX3,AR,MLPH,ZNF613,ACPP,STEAP2
gene_set_query	23	ZBTB16	0.00641	Enrichr Queries,0.00641	NFIX,MME,HPGD,MAOA,CITED2,GDF15,IRS1,NEDD4L,IRS2,IGF1,ADRB2,IQGAP2,CLU,KLF15,IGF1R,AKAP12,SOCS2,GHR,CCND1,MYC,KLF9,RHOU,FKBP5
gene_set_query	24	CASZ1	0.006757	ARCHS4 Coexpression,0.006757	FOXA1,MYBPC1,NFIX,ARHGEF37,MAOA,HOMER2,ABHD2,IRX3,KLK4,TMPRSS2,CWH43,KLK2,OPLAH,AQP3,SLC22A23,MLPH,FASN,TCEA3,ERGIC1,TRPM4,SPDEF,NKX3-1
gene_set_query	25	ZNF827	0.006845	GTEx Coexpression,0.006845	FOXA1,CHRNA2,CPNE4,AMD1,KLK4,NEDD4L,TMPRSS2,KLK3,KLK2,HOXB13,SLC25A27,ANKH,CREB3L4,PART1,PMEPA1,ZSCAN18,SPDEF,NKX3-1,NPDC1,SLC30A4,NME3,TBX3,FOLH1,ZNF613,ACPP,STEAP2,ZNF135
gene_set_query	26	HLF	0.007123	Enrichr Queries,0.007123	NFIX,THRB,MME,CITED2,IRS1,ZBTB16,EPHX2,IRS2,IGF1,IQGAP2,SLC4A4,CLU,KLF15,DHRS3,AKAP12,SOCS2,GHR,CCND1,MYC,KLF9,PMEPA1,GC,FKBP5
gene_set_query	27	SIM2	0.007371	ARCHS4 Coexpression,0.007371	FOXA1,SPON2,CHRNA2,HOMER2,SLC30A4,KLK4,TMPRSS2,KLK3,KLK2,CYP4F8,HOXB13,HOXA13,AR,TRPM8,ZNF577,ACPP,STEAP2,PDE9A,TRPM4,NKX3-1
gene_set_query	28	ZNF613	0.007467	GTEx Coexpression,0.007467	FOXA1,ABCC4,CHRNA2,CPNE4,SLC30A4,AMD1,KLK4,TMPRSS2,KLK3,KLK2,GATA2,HOXB13,CREB3L4,ZNF649,PMEPA1,TRPM8,ACPP,STEAP2,ERGIC1,SPDEF,NKX3-1
gene_set_query	29	ATOH8	0.007835	Enrichr Queries,0.007835	NFIX,MME,IL1R1,CITED2,GDF15,IRS1,ZBTB16,IRX3,IRS2,GATA2,CLU,KLF15,DHRS3,TBX3,AKAP12,SOCS2,GHR,CCND1,MYC,KLF9,PMEPA1,RHOU,FKBP5
gene_set_query	30	HOXC12	0.007985	ARCHS4 Coexpression,0.007985	FOXA1,NFIX,MME,MAOA,UGT2B17,HOXB13,RHOD,FGFRL1,ACACA,TBX3,HOXA10,AZGP1,FOLH1,NETO1,CREB3L4,FASN,MYO6,STEAP1,STEAP2,ERGIC1
gene_set_query	31	FOXA3	0.00809	GTEx Coexpression,0.00809	SPINK1,HGD,HOMER2,ABHD2,EPHX2,HPN,SLC43A1,UGT2B15,IQGAP2,GCAT,PBLD,GNMT,KRTCAP3,C5,TTR,TP53INP1,ANG,HMGCS2,TMED6,SLC17A4
gene_set_query	32	TCF7L2	0.008475	ENCODE ChIP-seq,0.008475	SLC22A3,UGT2B11,HGD,IL1R1,IRS1,IDH1,GREB1,SLC30A4,PLA2G7,PGC,F5,SLC22A23,C5,BDH1,CCND1,PART1,PDLIM5,TMED6,RAMP1,STEAP2
gene_set_query	33	GLIS1	0.008712	GTEx Coexpression,0.008712	NPDC1,SPON2,NFIX,MME,SLC30A4,AMD1,KLK4,KLK3,KLK2,GATA2,HOXB13,HOXA13,AR,PRR16,STEAP1,ACPP,STEAP2,RECK,NKX3-1
gene_set_query	34	ESR1	0.009214	ARCHS4 Coexpression,0.009214	FOXA1,IRS1,IRX3,GREB1,IGF1,RHOD,PRLR,SCUBE2,AZGP1,MLPH,CCND1,CREB3L4,H2AFJ,ERGIC1,SPDEF
gene_set_query	35	FOXA2	0.009334	GTEx Coexpression,0.009334	SPINK1,HGD,HOMER2,ABHD2,DCXR,HPN,SLC43A1,UGT2B15,IQGAP2,PGC,PBLD,GNMT,KRTCAP3,C5,TTR,TP53INP1,HMGCS2,TMED6,SLC17A4
gene_set_query	36	EHF	0.009828	ARCHS4 Coexpression,0.009828	FOXA1,ARHGEF37,MAOA,ABHD2,TMPRSS2,CWH43,AQP3,ACACA,ALDH1A3,AZGP1,FOLH1,MYO6,STEAP2,NKX3-1,MSMB
gene_set_query	37	ZKSCAN1	0.009956	GTEx Coexpression,0.009956	FOXA1,GRTP1,HOMER2,EPHX2,HPN,UGT2B15,PBLD,CYP39A1,SLC22A23,KRTCAP3,AZGP1,C5,TTR,BDH1,HSBP1L1,MYO6,CNGA1,HMGCS2,SLC17A4
gene_set_query	38	RBPJL	0.01044	ARCHS4 Coexpression,0.01044	GAMT,SPINK1,HOMER2,EGF,HPN,SLC43A1,GCAT,GNMT,KRTCAP3,AZGP1,ACADL,TCEA3,TMED6,RAMP1
gene_set_query	39	FEV	0.01058	GTEx Coexpression,0.01058	NPDC1,FOXA1,CHRNA2,CPNE4,SLC30A4,KLK4,NEDD4L,NME3,TMPRSS2,KLK3,KLK2,HOXB13,TRPV6,CREB3L4,ACPP,STEAP2,SPDEF,NKX3-1
gene_set_query	40	NR1H4	0.01068	Enrichr Queries,0.01068	SPINK1,THRB,MME,HGD,HPGD,GDF15,EPHX2,IGF1,IQGAP2,SLC4A4,CLU,TBX3,F5,GHR,AZGP1,TTR,CCND1,MYC,TCEA3,AGTR1,HMGCS2,GC
gene_set_query	41	PTF1A	0.01106	ARCHS4 Coexpression,0.01106	GAMT,SPINK1,HOMER2,EGF,HPN,SLC43A1,GCAT,GNMT,KRTCAP3,AZGP1,ACADL,TCEA3,TMED6,RAMP1
gene_set_query	42	ONECUT1	0.0112	GTEx Coexpression,0.0112	SPINK1,HGD,HOMER2,HPN,SLC43A1,UGT2B15,SLC4A4,GCAT,PBLD,GNMT,C5,TTR,TRPV6,ALB,TP53INP1,ANG,GC,SLC17A4
gene_set_query	43	ZNF563	0.0114	Enrichr Queries,0.0114	ARRDC4,NFIX,CITED2,GDF15,IRS1,ZBTB16,EPHX2,IRS2,IQGAP2,CLU,DHRS3,AKAP12,SOCS2,CCND1,MYC,FASN,TP53INP1,GC,ZNF577,PAG1,ZNF135,ZSCAN18
gene_set_query	44	XBP1	0.01167	ARCHS4 Coexpression,0.01167	FOXA1,HGD,IRX3,GREB1,SLC43A1,RHOD,PRLR,SCUBE2,AZGP1,MLPH,CREB3L4,H2AFJ,ERGIC1,SPDEF
gene_set_query	45	SOX14	0.01182	GTEx Coexpression,0.01182	MESP1,DLX1,CHRNA2,CPNE4,SLC30A4,AMD1,KLK4,KLK3,KLK2,HOXB13,TMEFF2,GRIN3A,FOLH1,CREB3L4,ACPP,SPDEF,NKX3-1
gene_set_query	46	ONECUT2	0.01245	GTEx Coexpression,0.01245	GLYATL1,HGD,DCXR,HPN,UGT2B15,ACADSB,PBLD,PPP3CA,C5,TTR,BDH1,GNG7,ALB,ANG,GC,SLC17A4
gene_set_query	47	PGR	0.0129	ARCHS4 Coexpression,0.0129	FOXA1,IL1R1,IRS1,GREB1,IGF1,PRLR,HOXA11,SCUBE2,TTR,MLPH,CREB3L4,GC,SPDEF
gene_set_query	48	PROX1	0.01351	ARCHS4 Coexpression,0.01351	GLYATL1,HGD,EPHX2,HPN,ACADSB,F5,C5,ALDH6A1,ALB,AGTR1,ANG,HMGCS2,GC
gene_set_query	49	NR3C2	0.01353	Enrichr Queries,0.01353	THRB,MME,HPGD,MAOA,CITED2,ZBTB16,EPHX2,NEDD4L,IRS2,IGF1,ADRB2,IQGAP2,SLC4A4,CLU,IGF1R,AKAP12,SOCS2,GHR,CCND1,MYC,KLF9
gene_set_query	50	HNF1A	0.01369	GTEx Coexpression,0.01369	GLYATL1,HGD,GRTP1,EPHX2,DCXR,HPN,UGT2B15,ACADSB,PBLD,C5,TTR,ALB,ANG,HMGCS2,SLC17A4
gene_set_query	51	GATA3	0.01413	ARCHS4 Coexpression,0.01413	NPDC1,FOXA1,IRS1,IRX3,GREB1,RHOD,PRLR,SCUBE2,MLPH,CREB3L4,H2AFJ,FASN,SPDEF
gene_set_query	52	NR2F6	0.01431	GTEx Coexpression,0.01431	HGD,GRTP1,EPHX2,DCXR,HPN,UGT2B15,RHOD,PBLD,KRTCAP3,NUDT8,BDH1,HSBP1L1,ANG,HMGCS2,SLC17A4
gene_set_query	53	IRX5	0.01474	ARCHS4 Coexpression,0.01474	NPDC1,FOXA1,IRS1,IRX3,GREB1,RHOD,PRLR,SCUBE2,AZGP1,MLPH,CREB3L4,FASN,SPDEF
gene_set_query	54	HOXC10	0.01496	Enrichr Queries,0.01496	FOXA1,DLX1,DLX2,MME,GDF15,ZBTB16,IRX3,IRS2,GATA2,HOXB13,HOXA13,TBX3,HOXA11,AKAP12,HOXA10,SOCS2,GHR,ALDH1A3,CCND1,MYC,PMEPA1
gene_set_query	55	MKX	0.01536	ARCHS4 Coexpression,0.01536	COLEC12,NFIX,MME,CITED2,IRS1,HOXA13,TBX3,HOXA11,AKAP12,LATS2,CCND1,RECK
gene_set_query	56	ELK4	0.01556	GTEx Coexpression,0.01556	CHRNA2,SLC30A4,KLK4,KLK3,KLK2,GATA2,HOXB13,CREB3L4,ZNF613,TRPM8,ATP6V0E2,ACPP,STEAP2,SPDEF,NKX3-1
gene_set_query	57	TFCP2L1	0.01567	Enrichr Queries,0.01567	MME,HPGD,GDF15,ZBTB16,EPHX2,NEDD4L,TMPRSS2,IRS2,IQGAP2,SLC4A4,AQP3,CLU,TBX3,AKAP12,SOCS2,CCND1,MYC,KLF9,PMEPA1,PLEKHH1,FKBP5
gene_set_query	58	PRDM8	0.01618	GTEx Coexpression,0.01618	CHRNA2,CPNE4,SLC30A4,KLK4,KLK3,KLK2,HOXB13,TMEFF2,GRIN3A,PART1,ZNF613,ACPP,STEAP2,NKX3-1
gene_set_query	59	ZNF23	0.01638	Enrichr Queries,0.01638	ARRDC4,MME,CITED2,GDF15,IRS1,ZBTB16,EPHX2,NEDD4L,IRS2,PLA2G7,CLU,KLF15,DHRS3,AKAP12,SOCS2,CCND1,MYC,FASN,KLF9,GC,FKBP5
gene_set_query	60	HNF4A	0.01658	ARCHS4 Coexpression,0.01658	HGD,MAOA,EPHX2,HPN,F5,PBLD,C5,ALB,ANG,HMGCS2,SLC26A3,SLC17A4
gene_set_query	61	POU5F1	0.0168	GTEx Coexpression,0.0168	GALNT7,SPINK1,HOMER2,HPN,SLC43A1,NEDD4L,TMPRSS2,PBLD,KRTCAP3,TRPV6,TP53INP1,GGT1,TMED6,SLC17A4
gene_set_query	62	ZNF577	0.01709	Enrichr Queries,0.01709	ARRDC4,NFIX,GDF15,NEDD4L,MBOAT2,IRS2,PPM1K,IQGAP2,IGF1R,AKAP12,CCND1,MYC,ZNF649,TCEA3,TP53INP1,ZNF613,ZNF502,STEAP2,PLEKHH1,ZNF135,ZSCAN18
gene_set_query	63	GATA4	0.0172	ARCHS4 Coexpression,0.0172	C5,SPINK1,HGD,IDH1,HPN,SLC43A1,TCEA3,ALB,HMGCS2,PDLIM5,FBXL7
gene_set_query	64	DMRTA1	0.01742	GTEx Coexpression,0.01742	GLYATL1,HGD,GRTP1,DCXR,HPN,UGT2B15,ACADSB,PBLD,C5,TTR,BDH1,ALB,ANG,GC
gene_set_query	65	NKX21	0.01781	ARCHS4 Coexpression,0.01781	DLX1,ANKRD29,DLX2,STEAP4,ACADL,MAOA,PEBP4,NEDD4L,ZNF385B,TRIM36,PGC
gene_set_query	66	ZNF648	0.01805	GTEx Coexpression,0.01805	GLYATL1,GRTP1,EPHX2,DCXR,HPN,UGT2B15,ACADSB,CYP39A1,C5,TTR,BDH1,ALB,ANG,HMGCS2
gene_set_query	67	ZBTB42	0.01843	ARCHS4 Coexpression,0.01843	FOXA1,MLPH,CREB3L4,IRS1,FASN,IRX3,GREB1,RHOD,PRLR,ERGIC1,SPDEF
gene_set_query	68	PPARG	0.01852	Enrichr Queries,0.01852	THRB,MME,HPGD,IL1R1,MAOA,GDF15,IRS1,ZBTB16,IRS2,IGF1,ADRB2,GATA2,CLU,DHRS3,AKAP12,SOCS2,GHR,ALDH1A3,CCND1,MYC,FASN
gene_set_query	69	ZFPM1	0.01867	GTEx Coexpression,0.01867	SPINK1,HOMER2,ABHD2,HPN,SLC43A1,IQGAP2,PGC,GCAT,PBLD,GNMT,KRTCAP3,TP53INP1,GGT1,TMED6
gene_set_query	70	HOXC6	0.01904	ARCHS4 Coexpression,0.01904	HOXA10,NFIX,MME,ITGB5,NETO1,IRX3,STEAP1,FGFRL1,ERGIC1,TBX3,HOXA11
gene_set_query	71	SMAD9	0.01923	Enrichr Queries,0.01923	COLEC12,NFIX,THRB,MME,IL1R1,GDF15,IRS1,ZBTB16,IRS2,IGF1,SLC4A4,CLU,DHRS3,AKAP12,SOCS2,GHR,CCND1,MYC,KLF9,PMEPA1
gene_set_query	72	SLC2A4RG	0.01929	GTEx Coexpression,0.01929	GLYATL1,GRTP1,EPHX2,DCXR,ACADSB,CYP39A1,GHR,AR,TTR,SMO,TP53TG1,CNGA1,ANG
gene_set_query	73	HNF4G	0.01966	ARCHS4 Coexpression,0.01966	VIPR1,MME,HPGD,MAOA,EPHX2,UGT2B17,CRYL1,SLC26A3,SMPDL3A,PBLD,SLC17A4
gene_set_query	74	ZGPAT	0.01991	GTEx Coexpression,0.01991	GLYATL1,HGD,DCXR,HPN,UGT2B15,ACADSB,PBLD,C5,TTR,BDH1,ALB,ANG,HMGCS2
gene_set_query	75	NPAS2	0.01994	Enrichr Queries,0.01994	NFIX,MME,IL1R1,CITED2,GDF15,IRS1,ZBTB16,NEDD4L,IRS2,SLC4A4,CLU,DHRS3,SOCS2,MLPH,CCND1,MYC,KLF9,PMEPA1,GC,FKBP5
gene_set_query	76	ASCL3	0.02054	GTEx Coexpression,0.02054	GALNT7,GLYATL2,DNASE2B,ZG16B,ACSL3,SH3RF1,KRTCAP3,ALDH1A3,AZGP1,MLPH,CREB3L4,CHPT1,SPDEF
gene_set_query	77	HOXC8	0.02066	Enrichr Queries,0.02066	FOXA1,COLEC12,DLX1,NFIX,MME,GDF15,IRS1,ZBTB16,IRX3,IGF1,GATA2,DHRS3,TBX3,HOXA11,AKAP12,HOXA10,ALDH1A3,CCND1,MYC,PMEPA1
gene_set_query	78	HOXC11	0.02088	ARCHS4 Coexpression,0.02088	FOXA1,HOXA10,MLPH,CREB3L4,IRX3,RHOD,HOXA13,PRLR,ERGIC1,SPDEF,HOXA11
gene_set_query	79	ARID3C	0.02116	GTEx Coexpression,0.02116	GLYATL1,HGD,DCXR,HPN,UGT2B15,ACADSB,PBLD,C5,TTR,BDH1,ALB,ANG,GC
gene_set_query	80	HOXC9	0.02137	Enrichr Queries,0.02137	FOXA1,COLEC12,DLX1,DLX2,MME,GDF15,IRS1,ZBTB16,IRX3,GATA2,HOXB13,HOXA13,TBX3,HOXA11,HOXA10,SOCS2,ALDH1A3,CCND1,MYC,PMEPA1
gene_set_query	81	ISX	0.0215	ARCHS4 Coexpression,0.0215	VIPR1,HGD,MAOA,EPHX2,TMPRSS2,UGT2B17,HMGCS2,SLC26A3,TRPM4,PBLD,SLC17A4
gene_set_query	82	NR1I3	0.02178	GTEx Coexpression,0.02178	GLYATL1,HGD,DCXR,HPN,UGT2B15,ACADSB,PBLD,C5,TTR,BDH1,ALB,ANG,GC
gene_set_query	83	HOXA7	0.02208	Enrichr Queries,0.02208	FOXA1,NFIX,MME,GDF15,ZBTB16,IRX3,IGF1,ADRB2,GATA2,HOXA13,TBX3,HOXA11,AKAP12,HOXA10,SOCS2,GHR,ALDH1A3,CCND1,MYC,PMEPA1
gene_set_query	84	ZNF385B	0.02211	ARCHS4 Coexpression,0.02211	AR,NFIX,STEAP4,ACADL,MAOA,HOMER2,PEBP4,KLK2,PGC,STEAP2,NKX3-1
gene_set_query	85	DBP	0.02279	Enrichr Queries,0.02279	GAMT,CITED2,GDF15,ZBTB16,EPHX2,IRS2,PLA2G7,CLU,KLF15,DHRS3,SOCS2,ALDH6A1,CCND1,MYC,FASN,TCEA3,KLF9,PMEPA1,HMGCS2,FKBP5
gene_set_query	86	TRPS1	0.02334	ARCHS4 Coexpression,0.02334	FOXA1,SCUBE2,AZGP1,MLPH,CREB3L4,IRS1,IRX3,GREB1,PRLR,SPDEF
gene_set_query	87	IRX4	0.0235	Enrichr Queries,0.0235	FOXA1,DLX1,DLX2,NFIX,MME,GDF15,IRS1,CTNND2,ZBTB16,IRX3,LPAR3,IRS2,GATA2,TBX3,HOXA10,ALDH1A3,CUX2,CCND1,MYC,PMEPA1
gene_set_query	88	TCF4	0.02357	ReMap ChIP-seq,0.02357	FOXA1,NFIX,THRB,HPGD,CITED2,IRS1,ABHD2,TMPRSS2,PBLD,HOXA11,HOXA10,SCUBE2,PPP3CA,CCND1,CREB3L4,H2AFJ,HMGCS2,GGT1,PAG1,NPDC1,GDF15,DCXR,NME3,GCAT,F5,ACPP,RAMP1
gene_set_query	89	ZNF615	0.02396	ARCHS4 Coexpression,0.02396	AR,CHRNA2,HOMER2,ZNF649,KLK2,TRPM8,CYP4F8,ZNF577,STEAP2,NKX3-1
gene_set_query	90	FOXP4	0.02427	GTEx Coexpression,0.02427	FOXA1,PSCA,HOMER2,TMPRSS2,IQGAP2,PGC,IGF1R,GULP1,KRTCAP3,MLPH,ACADL,TMED6
gene_set_query	91	SOX2	0.02439	Literature ChIP-seq,0.02439	FOXA1,SPON2,VIPR1,STEAP4,ITGB5,IRS1,AQP3,HOXA13,IGF1R,AKAP12,KRTCAP3,PPP3CA,H2AFJ,PMEPA1,NKX3-1,SPINK1,MME,NME3,F5,ALDH1A3,LATS2,RHOU,STEAP1,STEAP2,DLX1,ARHGEF26,HPGD,MAOA,USP54,PEX11A,SLC43A1,GATA2,IQGAP2,ACACA,SOCS2,ANKH,TP53TG1,MYO6,PDLIM5,TRPM4,SPDEF,NPDC1,GRTP1,MBOAT2,ELL2,ACADSB,DHRS3,TBX3,GULP1,MLPH,TRPV6,ASB9,CRYL1,TRIM36
gene_set_query	92	ZBTB10	0.02457	ARCHS4 Coexpression,0.02457	FOXA1,AR,HOMER2,AMD1,KLK4,KLK2,STEAP2,ACACA,TBX3,NKX3-1
gene_set_query	93	CREB3L1	0.02489	GTEx Coexpression,0.02489	FOXA1,GALNT7,SPINK1,PSCA,HOMER2,TMPRSS2,PGC,KRTCAP3,MLPH,TRPV6,TMED6,ERGIC1
gene_set_query	94	HOXA11	0.02493	Enrichr Queries,0.02493	FOXA1,DLX1,DLX2,NFIX,MME,IL1R1,GDF15,IRS1,ZBTB16,IRX3,GATA2,HOXB13,HOXA13,TBX3,AKAP12,HOXA10,SOCS2,ALDH1A3,CCND1,MYC
gene_set_query	95	OSR2	0.02518	ARCHS4 Coexpression,0.02518	HOXA10,COLEC12,NFIX,LATS2,MME,IL1R1,IRS1,RECK,TBX3,HOXA11
gene_set_query	96	ZNF667	0.02564	Enrichr Queries,0.02564	ARRDC4,THRB,MME,CITED2,GDF15,ZBTB16,NEDD4L,IRS2,CLU,IGF1R,AKAP12,SOCS2,CCND1,MYC,TP53INP1,KLF9,PMEPA1,ZNF135,ZSCAN18
gene_set_query	97	HNF1B	0.0258	ARCHS4 Coexpression,0.0258	TRPV6,HPN,TMPRSS2,HMGCS2,GGT1,SLC4A4,DHRS3,PLA1A,TRPM4,SLC17A4
gene_set_query	98	ZSCAN2	0.02614	GTEx Coexpression,0.02614	SPINK1,HOMER2,EGF,HPN,SLC43A1,MBOAT2,GCAT,GNMT,TRPV6,TCEA3,TP53INP1,TMED6
gene_set_query	99	HOXA4	0.02635	Enrichr Queries,0.02635	FOXA1,NFIX,MME,GDF15,ZBTB16,IRX3,IRS2,IGF1,ADRB2,GATA2,HOXA13,DHRS3,TBX3,HOXA11,AKAP12,HOXA10,SOCS2,ALDH1A3,PMEPA1
gene_set_query	100	ZNF69	0.02676	GTEx Coexpression,0.02676	MCCC2,HPN,SLC43A1,UGT2B15,TMPRSS2,IQGAP2,PGC,PBLD,KRTCAP3,HMGCS2,ERGIC1,SLC17A4
gene_set_query	101	NR5A2	0.02738	GTEx Coexpression,0.02738	SPINK1,HOMER2,EGF,HPN,SLC43A1,SLC4A4,GCAT,GNMT,TRPV6,TP53INP1,TMED6,SLC17A4
gene_set_query	102	HOXA3	0.02778	Enrichr Queries,0.02778	FOXA1,NFIX,GDF15,IRS1,ZBTB16,IRX3,IRS2,GATA2,HOXA13,DHRS3,TBX3,HOXA11,AKAP12,HOXA10,SOCS2,ALDH1A3,CCND1,MYC,PMEPA1
gene_set_query	103	CENPX	0.028	GTEx Coexpression,0.028	FOXA1,GRTP1,DCXR,TMPRSS2,SLC22A23,BDH1,CREB3L4,TP53TG1,HSBP1L1,ANG,HMGCS2,SPDEF
gene_set_query	104	HOXD11	0.02862	GTEx Coexpression,0.02862	SPON2,ABCC4,GATA2,ARHGAP6,HOXA13,PRLR,HOXA11,HOXA10,SOCS2,AR,SMO,RAMP1
gene_set_query	105	TWIST1	0.02887	ARCHS4 Coexpression,0.02887	CCND1,ITGB5,IL1R1,IRS1,PRR16,RECK,FBXL7,TBX3,HOXA11
gene_set_query	106	NR5A1	0.02948	ARCHS4 Coexpression,0.02948	GLUD1,C5,HPN,ALB,RHOU,ACSL3,ACADSB,TBX3,F5
gene_set_query	107	RFX6	0.02987	GTEx Coexpression,0.02987	KRTCAP3,SPINK1,TRPV6,PSCA,HOMER2,SLC43A1,TMPRSS2,SLC4A4,TMED6,PGC,GNMT
gene_set_query	108	NR4A1	0.0301	ARCHS4 Coexpression,0.0301	MLPH,ANKH,KLF9,KLK4,TMPRSS2,IRS2,TRPM8,ELL2,TRPM4
gene_set_query	109	HHEX	0.0303	ReMap ChIP-seq,0.0303	DLX1,IRS1,HPN,SOCS2,TTR,TP53INP1,PART1,GGT1,MSMB,SPINK1,IL1R1,GDF15,GREB1,SLC30A4,NME3,ELL2,DHRS3,TBX3,BDH1,ALB,KLF9,ANG,SMPDL3A,ERGIC1
gene_set_query	110	ESR2	0.03049	Literature ChIP-seq,0.03049	MCCC2,MAOA,HOMER2,GDF15,IRS1,CTNND2,ABHD2,DOCK8,GREB1,IRS2,CROT,DHRS3,SLC22A23,LATS2,MYC,KLF9,CHPT1
gene_set_query	111	HOXD9	0.03049	GTEx Coexpression,0.03049	HOXA10,SOCS2,SPON2,AR,SMO,GATA2,ARHGAP6,HOXA13,PRLR,FBXL7,HOXA11
gene_set_query	112	NFIA	0.03063	Enrichr Queries,0.03063	NFIX,THRB,CITED2,IRS1,ZBTB16,NEDD4L,IRS2,IGF1,IQGAP2,SLC4A4,CLU,DHRS3,IGF1R,AKAP12,CCND1,MYC,KLF9,PMEPA1,FKBP5
gene_set_query	113	GSX2	0.03071	ARCHS4 Coexpression,0.03071	DLX1,ALDH6A1,DLX2,FAM110B,SLC2A12,TRIM36,CROT,ATP6V0E2,CLU
gene_set_query	114	MECOM	0.03111	GTEx Coexpression,0.03111	FOXA1,SCUBE2,GALNT7,KRTCAP3,MLPH,PSCA,HOMER2,NEDD4L,TMPRSS2,TMED6,PGC
gene_set_query	115	TEF	0.03134	Enrichr Queries,0.03134	NFIX,CITED2,GDF15,ZBTB16,EPHX2,NEDD4L,IRS2,CLU,KLF15,DHRS3,AKAP12,SOCS2,CCND1,MYC,FASN,KLF9,PMEPA1,GC,FKBP5
gene_set_query	116	HOXD10	0.03174	GTEx Coexpression,0.03174	HOXA10,SOCS2,SPON2,AR,SMO,GATA2,ARHGAP6,RAMP1,HOXA13,PRLR,HOXA11
gene_set_query	117	IRX3	0.03194	ARCHS4 Coexpression,0.03194	SLC22A23,FOXA1,AZGP1,MLPH,CREB3L4,FASN,OPLAH,ERGIC1,SPDEF
gene_set_query	118	ZNF703	0.03205	Enrichr Queries,0.03205	NFIX,CITED2,GDF15,IRS1,IRX3,NEDD4L,IRS2,CLU,DHRS3,TBX3,IGF1R,AKAP12,CCND1,MYC,FASN,TP53INP1,KLF9,PMEPA1,FKBP5
gene_set_query	119	ASCL5	0.03236	GTEx Coexpression,0.03236	GAMT,MYBPC1,SPINK1,TRPV6,HOMER2,EGF,SLC43A1,TCEA3,SLC4A4,TMED6,GCAT
gene_set_query	120	MSX2	0.03256	ARCHS4 Coexpression,0.03256	FOXA1,COLEC12,HPGD,IRS1,RHOU,GATA2,PRLR,TBX3,SPDEF
gene_set_query	121	TP63	0.03276	Enrichr Queries,0.03276	FOXA1,THRB,MME,HPGD,GDF15,IRS1,ZBTB16,IRS2,IGF1,ADRB2,AQP3,CLU,TBX3,IGF1R,SOCS2,GHR,ALDH1A3,CCND1,MYC
gene_set_query	122	TIGD2	0.03298	GTEx Coexpression,0.03298	C5,GLYATL1,TTR,HGD,DCXR,HPN,UGT2B15,ALB,ANG,GC,ACADSB
gene_set_query	123	ZNF416	0.03348	Enrichr Queries,0.03348	ARRDC4,DLX2,CITED2,GDF15,ZBTB16,IRS2,ADRB2,KLF15,DHRS3,SOCS2,CCND1,MYC,TP53INP1,KLF9,PMEPA1,ZNF613,GC,ZSCAN18,FKBP5
gene_set_query	124	RUNX2	0.03367	ReMap ChIP-seq,0.03367	DLX2,NFIX,PSCA,ABHD2,ENDOD1,ADRB2,SH3RF1,HOXA11,HOXA10,PPP3CA,HERC3,ANKH,CREB3L4,PEBP4,PDLIM5,ANKRD29,IL1R1,GDF15,DHRS3,SLC25A37,LATS2,MLPH,KLF9,ERGIC1
gene_set_query	125	CBX2	0.0339	ENCODE ChIP-seq,0.0339	COLEC12,ARHGEF26,ITGB5,HPGD,TMPRSS2,CWH43,HOXB13,SH3RF1,PBLD,HOXA11,CLGN,CUX2,CCND1,PEBP4,GNG7,MYO6,ZNF385B,HMGCS2,NCAM2,ATP6V0E2,PAG1,NKX3-1,NPDC1,ANKRD29,MYBPC1,EGF,GREB1,SLC30A4,PGC,TBX3,F5,TMEFF2,BMPR1B,SLC26A3,SMPDL3A,PDE9A
gene_set_query	126	HOXB8	0.03419	Enrichr Queries,0.03419	FOXA1,DLX1,DLX2,NFIX,CITED2,GDF15,IRS1,IRX3,GATA2,HOXB13,HOXA13,DHRS3,TBX3,HOXA11,HOXA10,ALDH1A3,CCND1,MYC,PMEPA1
gene_set_query	127	CRX	0.03423	GTEx Coexpression,0.03423	C5,GLYATL1,TTR,BDH1,HGD,GRTP1,DCXR,HPN,ALB,ANG,ACADSB
gene_set_query	128	LBX2	0.03485	GTEx Coexpression,0.03485	C5,GLYATL1,TTR,HGD,DCXR,HPN,UGT2B15,ALB,ANG,ACADSB,PBLD
gene_set_query	129	ZNF528	0.0349	Enrichr Queries,0.0349	ARRDC4,CSGALNACT1,IL1R1,MAOA,GDF15,CLU,DHRS3,AKAP12,SOCS2,CCND1,MYC,ZNF649,TP53INP1,ZNF229,PMEPA1,ZNF502,ZNF577,ZNF135,ZSCAN18
gene_set_query	130	KLF9	0.03501	ARCHS4 Coexpression,0.03501	MYBPC1,NFIX,ANKH,IL1R1,MAOA,TCEA3,IRS2,FKBP5
gene_set_query	131	FOXF1	0.03563	ARCHS4 Coexpression,0.03563	SPON2,LATS2,CCND1,ITGB5,IL1R1,IRS1,RECK,TBX3
gene_set_query	132	TWIST2	0.03624	ARCHS4 Coexpression,0.03624	COLEC12,NFIX,MME,ITGB5,IL1R1,RECK,TBX3,HOXA11
gene_set_query	133	ZNF552	0.03632	Enrichr Queries,0.03632	FOXA1,GDF15,IRS1,ABHD2,GREB1,NEDD4L,TMPRSS2,AQP3,CLU,DHRS3,TBX3,IGF1R,MLPH,CCND1,CREB3L4,MYC,TP53INP1,KLF9,SPDEF
gene_set_query	134	ZNF217	0.03659	Literature ChIP-seq,0.03659	FOXA1,THRB,ARHGEF26,CPNE4,CITED2,IRS1,CTNND2,ABHD2,IQGAP2,IGF1R,SOCS2,PPP3CA,ANKH,CCND1,MYC,GNG7,FAM110B,TP53INP1,NCAM2,GALNT7,MME,HGD,IL1R1,HOMER2,GREB1,ACSL3,ELL2,PRLR,TBX3,GULP1,SLC22A23,MLPH,BDH1,ANG,BMPR1B,ACPP,ERGIC1
gene_set_query	135	NR1D1	0.03686	ARCHS4 Coexpression,0.03686	NFIX,SPINK1,TRPV6,TCEA3,KLF9,TMED6,CLU,GNMT
gene_set_query	136	ARID2	0.03704	ReMap ChIP-seq,0.03704	FOXA1,DLX1,DLX2,THRB,CITED2,SLC43A1,AMD1,NEDD4L,FGFRL1,CREB3L4,MYC,MSMB,GAMT,GDF15,DCXR,GREB1,ACSL3,ELL2,DHRS3,TBX3,FASN,ALB,KLF9,CHPT1
gene_set_query	137	ZNF684	0.03796	GTEx Coexpression,0.03796	C5,GLYATL1,TTR,HGD,DCXR,HPN,ALB,ANG,GC,ACADSB
gene_set_query	138	SP5	0.03808	ARCHS4 Coexpression,0.03808	GLUD1,C5,SMO,IDH1,HPN,ALB,ACSL3,F5
gene_set_query	139	HOXD8	0.03846	Enrichr Queries,0.03846	FOXA1,COLEC12,DLX1,DLX2,GDF15,IRX3,IGF1,GATA2,PLA2G7,HOXA13,CLU,DHRS3,TBX3,HOXA11,AKAP12,HOXA10,GHR,ALDH1A3
gene_set_query	140	ATF5	0.03858	GTEx Coexpression,0.03858	C5,GLYATL1,TTR,HGD,DCXR,HPN,ALB,ANG,GC,ACADSB
gene_set_query	141	SOX9	0.0387	ARCHS4 Coexpression,0.0387	GLUD1,NFIX,IRS1,CTNND2,DOCK8,SLC4A4,CLU,FGFRL1
gene_set_query	142	HOXA9	0.03917	Enrichr Queries,0.03917	FOXA1,NFIX,MME,GDF15,IRS1,ZBTB16,IRS2,IGF1,GATA2,HOXA13,TBX3,IGF1R,HOXA11,HOXA10,SOCS2,ALDH1A3,CCND1,MYC
gene_set_query	143	BHLHA15	0.0392	GTEx Coexpression,0.0392	SPINK1,TRPV6,HOMER2,EGF,SLC43A1,TP53INP1,SLC4A4,TMED6,GCAT,GNMT
gene_set_query	144	MNX1	0.03983	GTEx Coexpression,0.03983	KRTCAP3,SPINK1,TRPV6,HOMER2,EGF,SLC43A1,SLC4A4,TMED6,GCAT,GNMT
gene_set_query	145	PAX9	0.03989	Enrichr Queries,0.03989	FOXA1,DLX1,DLX2,NFIX,THRB,MME,GDF15,IRS1,IRX3,GATA2,HOXB13,DHRS3,TBX3,HOXA10,SOCS2,ALDH1A3,CCND1,MYC
gene_set_query	146	KLF4	0.03993	ARCHS4 Coexpression,0.03993	VIPR1,LATS2,KLF9,TMPRSS2,IRS2,CWH43,SLC26A3,TRPM4
gene_set_query	147	PCGF2	0.0404	ReMap ChIP-seq,0.0404	FOXA1,CSGALNACT1,DLX1,DLX2,HPGD,ZBTB16,GREB1,IQGAP2,HOXB13,PLA2G7,ARHGAP6,HOXA13,IGF1R,HOXA11,CLGN,HOXA10,TMEFF2,ACADL,AGTR1,ZNF385B,TRIM36,BMPR1B,NKX3-1
gene_set_query	148	PDX1	0.04045	GTEx Coexpression,0.04045	SPINK1,TRPV6,HOMER2,EGF,SLC43A1,TP53INP1,SLC4A4,TMED6,GCAT,GNMT
gene_set_query	149	HOXA2	0.0406	Enrichr Queries,0.0406	FOXA1,DLX1,NFIX,GDF15,ZBTB16,IRX3,ADRB2,GATA2,HOXA13,DHRS3,TBX3,HOXA11,HOXA10,SOCS2,GHR,ALDH1A3,CCND1,MYC
gene_set_query	150	FOXD4L1	0.04131	Enrichr Queries,0.04131	FOXA1,DLX1,NFIX,GDF15,ZBTB16,IRX3,ADRB2,GATA2,IQGAP2,KLF15,DHRS3,SOCS2,ALDH1A3,GRIN3A,CUX2,MYC,ZNF385B,RHOU
gene_set_query	151	ZNF98	0.04169	GTEx Coexpression,0.04169	SPINK1,TRPV6,HOMER2,EGF,SLC43A1,SLC4A4,TMED6,FGFRL1,GCAT,GNMT
gene_set_query	152	CDX2	0.04177	ARCHS4 Coexpression,0.04177	VIPR1,MAOA,TMPRSS2,UGT2B17,SLC26A3,TRPM4,PBLD,SLC17A4
gene_set_query	153	MAF	0.04202	Enrichr Queries,0.04202	COLEC12,MME,ITGB5,HPGD,CITED2,IRS1,ZBTB16,IRS2,IGF1,IQGAP2,CLU,DHRS3,AKAP12,SOCS2,CCND1,MYC,KLF9,PMEPA1
gene_set_query	154	CDX1	0.04238	ARCHS4 Coexpression,0.04238	VIPR1,MAOA,TMPRSS2,UGT2B17,SLC26A3,TRPM4,PBLD,SLC17A4
gene_set_query	155	MTF2	0.04268	Literature ChIP-seq,0.04268	FOXA1,MESP1,VIPR1,THRB,IRS1,CTNND2,DOCK8,SLC4A4,AQP3,ARHGAP6,HOXA13,IGF1R,HOXA11,CLGN,HOXA10,GHR,PPP3CA,NETO1,PMEPA1,NKX3-1,CSGALNACT1,SLC30A4,GCAT,SLC22A23,AR,ALDH1A3,TMEFF2,LATS2,SMO,PRR16,COLEC12,SLC22A3,DLX1,DLX2,NFIX,HPN,SLC43A1,ENDOD1,TMPRSS2,LPAR3,GATA2,HOXB13,SCUBE2,NCAM2,PAG1,NPDC1,GALNT7,HOMER2,ZBTB16,IRX3,GREB1,DHRS3,TBX3,GRIN3A,TRIM36,CHPT1,RAMP1,FBXL7
gene_set_query	156	ARNTL	0.04274	Enrichr Queries,0.04274	CITED2,GDF15,IRS1,ZBTB16,NEDD4L,IRS2,ADRB2,CLU,DHRS3,AKAP12,SOCS2,CCND1,MYC,FASN,KLF9,PMEPA1,GC,FKBP5
gene_set_query	157	TCF23	0.04294	GTEx Coexpression,0.04294	HOXA10,AR,SMO,GREB1,GATA2,RAMP1,PRLR,FBXL7,HOXA11
gene_set_query	158	FOXD4	0.043	ARCHS4 Coexpression,0.043	NPDC1,FOLH1,NETO1,IRX3,ADRB2,STEAP2,ACACA,NKX3-1
gene_set_query	159	ZNF433	0.04345	Enrichr Queries,0.04345	ARRDC4,VIPR1,CITED2,GDF15,NEDD4L,TMPRSS2,IRS2,GATA2,TBX3,MYC,TCEA3,TP53INP1,KLF9,PMEPA1,TRIM36,ZNF502,ZNF577,ZSCAN18
gene_set_query	160	FOXD4L5	0.04356	GTEx Coexpression,0.04356	GHR,MESP1,STEAP4,PEX11A,FASN,AGTR1,IRS2,IGF1,FKBP5
gene_set_query	161	THRA	0.04416	Enrichr Queries,0.04416	NFIX,CITED2,GDF15,IRS1,ZBTB16,NEDD4L,IRS2,CLU,DHRS3,IGF1R,SOCS2,CCND1,MYC,FASN,KLF9,PMEPA1,GC,FKBP5
gene_set_query	162	ESRRG	0.04418	GTEx Coexpression,0.04418	KRTCAP3,MLPH,PSCA,HOMER2,ABHD2,SLC2A12,NEDD4L,ZNF385B,PGC
gene_set_query	163	OLIG1	0.04423	ARCHS4 Coexpression,0.04423	CTNND2,ABHD2,GNG7,NCAM2,ATP6V0E2,RAMP1,PLEKHH1
gene_set_query	164	CUX2	0.0448	GTEx Coexpression,0.0448	C5,GLYATL1,TTR,BDH1,HGD,DCXR,ALB,ANG,ACADSB
gene_set_query	165	HOXA1	0.04487	Enrichr Queries,0.04487	FOXA1,DLX1,DLX2,MME,GDF15,IRX3,ADRB2,GATA2,HOXA13,DHRS3,TBX3,IGF1R,HOXA11,AKAP12,HOXA10,ALDH1A3,CCND1,MYC
gene_set_query	166	ZNF710	0.04543	GTEx Coexpression,0.04543	SPINK1,TRPV6,HOMER2,EGF,SLC43A1,SLC4A4,TMED6,GCAT,GNMT
gene_set_query	167	OLIG2	0.04545	ARCHS4 Coexpression,0.04545	NFIX,CTNND2,GNG7,NCAM2,ATP6V0E2,RAMP1,PLEKHH1
gene_set_query	168	WT1	0.04558	Enrichr Queries,0.04558	FOXA1,MME,CITED2,GDF15,ZBTB16,IRS2,IGF1,GATA2,CLU,TBX3,IGF1R,AKAP12,SOCS2,GHR,ALDH1A3,CCND1,MYC,AGTR1
gene_set_query	169	SP8	0.04605	GTEx Coexpression,0.04605	CHRNA2,SLC30A4,KLK4,KLK3,CWH43,KLK2,HOXB13,ACPP,NKX3-1
gene_set_query	170	FOXL1	0.04607	ARCHS4 Coexpression,0.04607	LATS2,CCND1,ITGB5,IRS1,RECK,ERGIC1,TBX3
gene_set_query	171	NR2F2	0.04668	ARCHS4 Coexpression,0.04668	FOXA1,LATS2,CCND1,IRS1,DOCK8,FBXL7,HOXA11
gene_set_query	172	CREB3L3	0.04701	Enrichr Queries,0.04701	CGREF1,MME,HPGD,HOMER2,GDF15,EPHX2,HPN,IGF1,SLC4A4,CLU,DHRS3,F5,AZGP1,TTR,MYC,ANG,HMGCS2,GC
gene_set_query	173	FOXG1	0.0473	ARCHS4 Coexpression,0.0473	DLX1,DLX2,CTNND2,FAM110B,NEDD4L,TRIM36,ZSCAN18
gene_set_query	174	FOXC1	0.04772	Enrichr Queries,0.04772	FOXA1,COLEC12,NFIX,CITED2,GDF15,IRS1,IRX3,IRS2,GATA2,CLU,DHRS3,TBX3,AKAP12,ALDH1A3,CCND1,MYC,KLF9,PMEPA1
gene_set_query	175	ZNF33B	0.04792	GTEx Coexpression,0.04792	KRTCAP3,SPINK1,TRPV6,HOMER2,SLC43A1,SLC4A4,TMED6,GCAT,GNMT
gene_set_query	176	HMGA2	0.04853	ARCHS4 Coexpression,0.04853	AKAP12,CCND1,SMO,IRS1,DOCK8,HOXB13,GULP1
gene_set_query	177	FOXM1	0.04878	Literature ChIP-seq,0.04878	FOXA1,MESP1,VIPR1,STEAP4,THRB,ITGB5,USP54,CTNND2,TMPRSS2,IRS2,CROT,PPM1K,SLC4A4,ARHGAP6,IGF1R,SOCS2,HERC3,CCND1,NETO1,MYC,MYO6,PMEPA1,NCAM2,PAG1,SPDEF,MCCC2,GALNT7,ABCC4,MYBPC1,SPINK1,MME,HGD,ANKRD30B,IL1R1,DNASE2B,GREB1,SLC2A12,ACSL3,ELL2,PRLR,SLC22A23,AGTR1,ACPP
gene_set_query	178	TSHZ3	0.04914	ARCHS4 Coexpression,0.04914	MESP1,NFIX,LATS2,ITGB5,IL1R1,RECK,FBXL7
gene_set_query	179	ZFP14	0.04915	Enrichr Queries,0.04915	ARRDC4,THRB,CITED2,GDF15,ZBTB16,EPHX2,IRS2,DHRS3,IGF1R,ALDH6A1,MYC,GNG7,TP53INP1,KLF9,GC,RECK,PAG1,FKBP5
gene_set_query	180	HOXA6	0.04916	GTEx Coexpression,0.04916	HOXA10,PTGFR,PRR16,UGT2B17,ATP6V0E2,SMPDL3A,RECK,TRPM4,HOXA11
gene_set_query	181	HOXD13	0.04978	GTEx Coexpression,0.04978	ARRDC4,HOXA10,SOCS2,AR,ABCC4,ARHGAP6,HOXA13,PDE9A,HOXA11
gene_set_query	182	TFAP2C	0.05037	ARCHS4 Coexpression,0.05037	FOXA1,MLPH,CREB3L4,IRS1,GREB1,TBX3,SPDEF
gene_set_query	183	MBD3	0.05051	ReMap ChIP-seq,0.05051	NPDC1,FOXA1,MESP1,DLX1,DLX2,NFIX,GDF15,GREB1,GATA2,OPLAH,RHOD,FGFRL1,DHRS3,HOXA11,HOXA10,MLPH,CCND1,MYC,FASN,PMEPA1,TRPM4,SPDEF
gene_set_query	184	BARX2	0.05057	Enrichr Queries,0.05057	FOXA1,DLX2,THRB,MME,CITED2,GDF15,ZBTB16,IRX3,TMPRSS2,ADRB2,IQGAP2,AQP3,DHRS3,TBX3,ALDH1A3,CCND1,MYC,KLF9
gene_set_query	185	CTCF	0.05085	ENCODE ChIP-seq,0.05085	CPNE4,PPM1K,IQGAP2,CLU,SH3RF1,PBLD,CLGN,SOCS2,KRTCAP3,HERC3,CCND1,CREB3L4,ZNF649,ZNF502,ATP6V0E2,GAMT,GDF15,IGF1,F5,DHRS7,FASN,HSBP1L1,PRR16,STEAP1,ACPP,FBXL7
gene_set_query	186	LMX1B	0.05098	ARCHS4 Coexpression,0.05098	FOXA1,SCUBE2,MLPH,IRX3,GREB1,TRPM4,SPDEF
gene_set_query	187	HOXD12	0.05103	GTEx Coexpression,0.05103	ARRDC4,HOXA10,SOCS2,AR,ABCC4,ARHGAP6,HOXA13,PDE9A,HOXA11
gene_set_query	188	CEBPA	0.05128	Enrichr Queries,0.05128	ITGB5,HPGD,CITED2,GDF15,ZBTB16,IDH1,IRS2,IGF1,ADRB2,GATA2,CLU,DHRS3,SOCS2,GHR,CCND1,MYC,FASN,GC
gene_set_query	189	HOXC4	0.05199	Enrichr Queries,0.05199	FOXA1,COLEC12,DLX1,NFIX,MME,GDF15,IRS1,ZBTB16,IRX3,GATA2,DHRS3,TBX3,HOXA10,SOCS2,ALDH1A3,CCND1,MYC,PMEPA1
gene_set_query	190	SIX1	0.05221	ARCHS4 Coexpression,0.05221	GAMT,HOXA10,MYBPC1,NFIX,PEBP4,TCEA3,PDLIM5
gene_set_query	191	ZNF135	0.05271	Enrichr Queries,0.05271	CSGALNACT1,NFIX,THRB,IRS1,ZBTB16,IRS2,ADRB2,IGF1R,AKAP12,SOCS2,CCND1,GNG7,ZNF229,PMEPA1,ZNF502,ZNF577,PAG1,ZSCAN18
gene_set_query	192	FOXO3	0.05283	ARCHS4 Coexpression,0.05283	SLC22A23,SLC25A37,NFIX,KLF9,ENDOD1,MBOAT2,IRS2
gene_set_query	193	RXRA	0.05342	Enrichr Queries,0.05342	NFIX,ITGB5,CITED2,GDF15,IRS1,ZBTB16,IDH1,NEDD4L,IRS2,CLU,DHRS3,IGF1R,CCND1,MYC,FASN,KLF9,PMEPA1,FKBP5
gene_set_query	194	TBX10	0.05344	ARCHS4 Coexpression,0.05344	VIPR1,MAOA,TMPRSS2,UGT2B17,SLC26A3,PBLD,SLC17A4
gene_set_query	195	ZBED3	0.05352	GTEx Coexpression,0.05352	GHR,MAOA,PEX11A,FASN,AGTR1,IGF1,FGFRL1,DHRS3
gene_set_query	196	CXXC4	0.05387	ReMap ChIP-seq,0.05387	GAMT,FOXA1,DLX1,DLX2,DCXR,AMD1,NEDD4L,NME3,GATA2,ELL2,HOXA13,GCAT,IGF1R,HOXA11,HOXA10,CCND1,CREB3L4,MYC,HSBP1L1,KLF9,ANG,TRPM4
gene_set_query	197	FERD3L	0.05414	GTEx Coexpression,0.05414	MME,CCND1,CITED2,IRS1,PRR16,CNTN3,STEAP1,RECK
gene_set_query	198	HIF3A	0.05476	GTEx Coexpression,0.05476	ARHGEF26,MAOA,ZBTB16,KLF9,ARHGAP6,KLF15,FBXL7,FKBP5
gene_set_query	199	ZBTB7C	0.05528	ARCHS4 Coexpression,0.05528	SLC22A23,ARHGEF37,CWH43,AQP3,SLC26A3,TRPM4,MSMB
gene_set_query	200	SOX13	0.05538	GTEx Coexpression,0.05538	ACADL,ZBTB16,KLF9,GATA2,ARHGAP6,KLF15,FBXL7,GULP1
gene_set_query	201	ZNF350	0.05556	Enrichr Queries,0.05556	ARRDC4,MAOA,CITED2,GDF15,IRS2,ADRB2,IQGAP2,IGF1R,SOCS2,MYC,ZNF649,TP53INP1,KLF9,PMEPA1,ZNF613,TRIM36,ZNF577
gene_set_query	202	HSFY1	0.056	GTEx Coexpression,0.056	GALNT7,ITGB5,DNASE2B,MYO6,ACSL3,SLC4A4,TMED6,GCAT
gene_set_query	203	ZNF404	0.05627	Enrichr Queries,0.05627	ARRDC4,COLEC12,MME,CITED2,GDF15,IQGAP2,CLU,DHRS3,CLGN,AKAP12,SOCS2,GHR,CCND1,TP53INP1,PMEPA1,ZNF577,PAG1
gene_set_query	204	ZNF189	0.05698	Enrichr Queries,0.05698	ARRDC4,HOMER2,CITED2,ZBTB16,NEDD4L,IRS2,PPM1K,ELL2,ACADSB,KLF15,PBLD,SOCS2,MYC,TP53INP1,KLF9,ACPP,FKBP5
gene_set_query	205	SOX8	0.05713	ARCHS4 Coexpression,0.05713	NFIX,CTNND2,GNG7,ATP6V0E2,RAMP1,PLEKHH1
gene_set_query	206	ESRRA	0.05724	ReMap ChIP-seq,0.05724	GAMT,FOXA1,MESP1,HGD,PSCA,GDF15,ZG16B,ABHD2,ACSL3,IQGAP2,AQP3,RHOD,PRLR,DHRS3,TBX3,SOCS2,NUDT8,MLPH,FASN,PMEPA1,SPDEF,MSMB
gene_set_query	207	ZNF432	0.05725	GTEx Coexpression,0.05725	SPINK1,TRPV6,HOMER2,SLC43A1,ZNF502,SLC4A4,TMED6,GCAT
gene_set_query	208	FOXI1	0.05769	Enrichr Queries,0.05769	FOXA1,DLX1,MYBPC1,DLX2,MME,GDF15,EGF,ZBTB16,HPN,TMPRSS2,GATA2,ALDH1A3,AZGP1,TRPV6,MYC,HMGCS2,SPDEF
gene_set_query	209	DBX2	0.05774	ARCHS4 Coexpression,0.05774	ARHGEF26,CTNND2,FAM110B,ATP6V0E2,RAMP1,CLU
gene_set_query	210	RUNX1	0.05787	GTEx Coexpression,0.05787	PTGFR,ALDH1A3,AZGP1,IL1R1,ATP6V0E2,STEAP1,RECK,ZSCAN18
gene_set_query	211	SNAI2	0.05835	ARCHS4 Coexpression,0.05835	LATS2,ITGB5,IL1R1,IRS1,RECK,TBX3
gene_set_query	212	ZNF575	0.0584	Enrichr Queries,0.0584	GAMT,NPDC1,SPON2,NFIX,IL1R1,CITED2,GDF15,IRS1,ZBTB16,IRS2,ADRB2,MYC,TCEA3,KLF9,PMEPA1,GC,PAG1
gene_set_query	213	ZNF614	0.05897	ARCHS4 Coexpression,0.05897	AR,IDH1,ZNF649,AMD1,KLK2,NKX3-1
gene_set_query	214	FOXD2	0.05912	GTEx Coexpression,0.05912	SLC22A3,PTGFR,CYP2U1,ACADL,ENDOD1,UGT2B17,SLC26A3,GULP1
gene_set_query	215	ZNF275	0.05912	Enrichr Queries,0.05912	CITED2,GDF15,IRS1,ABHD2,IRS2,ADRB2,CLU,IGF1R,AKAP12,SOCS2,CCND1,MYC,FASN,TP53INP1,PMEPA1,PAG1,FKBP5
gene_set_query	216	TCF12	0.05932	ENCODE ChIP-seq,0.05932	FOXA1,VIPR1,CITED2,GREB1,RHOD
gene_set_query	217	PRRX1	0.05958	ARCHS4 Coexpression,0.05958	COLEC12,NFIX,ITGB5,IL1R1,RECK,FBXL7
gene_set_query	218	MAFF	0.05974	GTEx Coexpression,0.05974	SOCS2,LATS2,ITGB5,MYC,ZBTB16,KLF9,ELL2
gene_set_query	219	ZNF583	0.05983	Enrichr Queries,0.05983	ARRDC4,CSGALNACT1,CITED2,GDF15,IRS1,ADRB2,IQGAP2,AKAP12,SOCS2,MYC,ZNF649,TP53INP1,KLF9,ZNF613,ZNF502,ZNF577,ZSCAN18
gene_set_query	220	ZNF469	0.0602	ARCHS4 Coexpression,0.0602	NFIX,LATS2,CCND1,ITGB5,IRS1,RECK
gene_set_query	221	HOXD3	0.06036	GTEx Coexpression,0.06036	HOXA10,AR,IRS1,GREB1,PRLR,FBXL7,HOXA11
gene_set_query	222	HOXB6	0.06054	Enrichr Queries,0.06054	FOXA1,NFIX,GDF15,IRS1,IRX3,GATA2,HOXB13,CLU,DHRS3,TBX3,AKAP12,HOXA10,SOCS2,ALDH1A3,CCND1,MYC,PMEPA1
gene_set_query	223	PRRX2	0.06081	ARCHS4 Coexpression,0.06081	NFIX,CCND1,ITGB5,IL1R1,RECK,TBX3
gene_set_query	224	BACH1	0.06098	Literature ChIP-seq,0.06098	FOXA1,COLEC12,PTGFR,STEAP4,THRB,PSCA,CTNND2,IRS2,KLK2,CLU,PBLD,AKAP12,HOXA10,SCUBE2,ACADL,CNGA1,PMEPA1,ZSCAN18,MME,GRTP1,GDF15,UGT2B17,IGF1,DHRS3,F5,AR,ALDH1A3,SLC25A37,FOLH1,KLF9,PLA1A
gene_set_query	225	GLI1	0.06098	GTEx Coexpression,0.06098	SLC22A3,PTGFR,CYP2U1,ARHGEF37,ANKRD30B,ENDOD1,GULP1
gene_set_query	226	HOXB9	0.06125	Enrichr Queries,0.06125	FOXA1,DLX1,GDF15,IRX3,GATA2,HOXB13,HOXA13,DHRS3,TBX3,HOXA11,AKAP12,HOXA10,SOCS2,ALDH1A3,CCND1,MYC,PMEPA1
gene_set_query	227	SMAD3	0.06143	ARCHS4 Coexpression,0.06143	ALDH1A3,LATS2,CCND1,ITGB5,IRS1,ERGIC1
gene_set_query	228	ZFHX3	0.06161	GTEx Coexpression,0.06161	LATS2,ACADL,ZBTB16,KLF9,PMEPA1,ARHGAP6,GULP1
gene_set_query	229	FOXH1	0.06223	GTEx Coexpression,0.06223	GALNT7,KRTCAP3,UGT2B17,HMGCS2,SLC26A3,PDE9A,TRPM4
gene_set_query	230	HOXB5	0.06268	Enrichr Queries,0.06268	FOXA1,COLEC12,NFIX,CITED2,GDF15,ZBTB16,IRX3,GATA2,CLU,DHRS3,TBX3,AKAP12,HOXA10,SOCS2,CCND1,MYC,PMEPA1
gene_set_query	231	EBF4	0.06285	GTEx Coexpression,0.06285	SLC25A27,SMO,NME3,ZNF577,ARHGAP6,ZNF135,ZSCAN18
gene_set_query	232	GATA5	0.06327	ARCHS4 Coexpression,0.06327	MAOA,EPHX2,UGT2B17,HMGCS2,PBLD,SLC17A4
gene_set_query	233	ZNF837	0.06347	GTEx Coexpression,0.06347	CYP39A1,SMO,GRTP1,EPHX2,HSBP1L1,HPN,CROT
gene_set_query	234	NFATC4	0.06388	ARCHS4 Coexpression,0.06388	COLEC12,NFIX,SMO,ITGB5,RECK,FBXL7
gene_set_query	235	NR1H2	0.06397	ReMap ChIP-seq,0.06397	FOXA1,SPINK1,CITED2,GDF15,ZG16B,ABHD2,NME3,IRS2,ACSL3,HOXA13,GCAT,DHRS3,HOXA11,HOXA10,MLPH,CCND1,MYC,FASN,PDLIM5,ERGIC1,TRPM4
gene_set_query	236	YY1	0.06409	GTEx Coexpression,0.06409	CSGALNACT1,CITED2,IRS1,CROT,ARHGAP6,PLEKHH1,FGFRL1
gene_set_query	237	FOXO1	0.0641	Enrichr Queries,0.0641	CITED2,IRS1,ZBTB16,NEDD4L,IRS2,IGF1,ADRB2,CLU,DHRS3,IGF1R,AKAP12,SOCS2,CCND1,MYC,KLF9,PMEPA1,FKBP5
gene_set_query	238	EPAS1	0.0645	ARCHS4 Coexpression,0.0645	VIPR1,LATS2,ITGB5,IL1R1,MAOA,TBX3
gene_set_query	239	FOXD3	0.06472	GTEx Coexpression,0.06472	SLC22A3,PTGFR,CYP2U1,ARHGEF26,ARHGEF37,ENDOD1,GULP1
gene_set_query	240	GATA6	0.06553	Enrichr Queries,0.06553	FOXA1,MME,CITED2,GDF15,IRS1,IRS2,GATA2,CLU,DHRS3,TBX3,AKAP12,SOCS2,GHR,ALDH1A3,CCND1,MYC,PMEPA1
gene_set_query	241	HOXA10	0.06572	ARCHS4 Coexpression,0.06572	GAMT,MYBPC1,TCEA3,GATA2,HOXA13,HOXA11
gene_set_query	242	RAG1	0.06695	ARCHS4 Coexpression,0.06695	GALNT7,CYP2U1,MME,TP53INP1,PAG1,ERGIC1
gene_set_query	243	ELF3	0.06721	GTEx Coexpression,0.06721	SLC22A23,FOXA1,GALNT7,KRTCAP3,MYO6,TMPRSS2,TRPM4
gene_set_query	244	NME2	0.06734	ReMap ChIP-seq,0.06734	COLEC12,MESP1,MYBPC1,NFIX,STEAP4,THRB,HGD,ZG16B,KLK3,HOXB13,PGC,F5,GHR,AZGP1,CUX2,TTR,ANKH,PI15,TRPM8,NCAM2,PAG1
gene_set_query	245	ZNF165	0.06757	ARCHS4 Coexpression,0.06757	TTR,ANKRD30B,GRTP1,ELL2,SMPDL3A,F5
gene_set_query	246	RFX5	0.0678	ENCODE ChIP-seq,0.0678	FOXA1,ALDH6A1,CCND1,SLC2A12,AMD1,TP53INP1,KLF9,ASB9,CNTN3,RHOD,RECK
gene_set_query	247	PAX4	0.06783	GTEx Coexpression,0.06783	UGT2B17,HMGCS2,IQGAP2,SLC26A3,PDE9A,TRPM4,SLC17A4
gene_set_query	248	ZSCAN1	0.06818	ARCHS4 Coexpression,0.06818	NPDC1,TTR,CTNND2,GC,ATP6V0E2,ZSCAN18
gene_set_query	249	ZNF706	0.06845	GTEx Coexpression,0.06845	SPINK1,TRPV6,HOMER2,SLC43A1,SLC4A4,TMED6,GNMT
gene_set_query	250	HEY1	0.06907	GTEx Coexpression,0.06907	PPP3CA,CGREF1,NETO1,CTNND2,GNG7,ATP6V0E2
gene_set_query	251	NR0B1	0.06941	ARCHS4 Coexpression,0.06941	TTR,CYP2U1,ASB9,GC,ELL2,TMED6
gene_set_query	252	SIM1	0.0697	GTEx Coexpression,0.0697	PTGFR,MME,CITED2,PRR16,STEAP1,RECK
gene_set_query	253	MXD4	0.0698	Enrichr Queries,0.0698	ARRDC4,NFIX,ITGB5,CITED2,GDF15,IDH1,IRS2,DHRS3,SOCS2,CCND1,MYC,FASN,TP53INP1,KLF9,PMEPA1,GC,FKBP5
gene_set_query	254	FOXQ1	0.07002	ARCHS4 Coexpression,0.07002	GDF15,IRS1,AQP3,FGFRL1,TBX3,F5
gene_set_query	255	HOXA5	0.07051	Enrichr Queries,0.07051	FOXA1,GDF15,ZBTB16,IRX3,IRS2,ADRB2,GATA2,DHRS3,TBX3,AKAP12,HOXA10,SOCS2,GHR,ALDH1A3,CCND1,MYC,KLF9
gene_set_query	256	ZNF821	0.07064	ARCHS4 Coexpression,0.07064	DLX1,DLX2,FAM110B,TRIM36,ATP6V0E2,ZSCAN18
gene_set_query	257	NANOG	0.07071	ReMap ChIP-seq,0.07071	GAMT,FOXA1,DLX1,DLX2,THRB,CITED2,IRS1,DCXR,GATA2,HOXB13,HOXA13,GCAT,DHRS3,TBX3,HOXA11,GULP1,HOXA10,SOCS2,NUDT8,CCND1,SMPDL3A
gene_set_query	258	TBX15	0.07125	ARCHS4 Coexpression,0.07125	GAMT,MYBPC1,NFIX,PEBP4,TCEA3,PDLIM5
gene_set_query	259	ZBTB8A	0.07156	GTEx Coexpression,0.07156	LATS2,ZBTB16,KLF9,ARHGAP6,FBXL7,FKBP5
gene_set_query	260	ZMAT1	0.07194	Enrichr Queries,0.07194	ARRDC4,HPGD,CITED2,GDF15,ZBTB16,IRS2,IGF1,ADRB2,PPM1K,ARHGAP6,CLU,AKAP12,SOCS2,SLC25A27,TP53INP1,KLF9,GC
gene_set_query	261	ZNF117	0.07218	GTEx Coexpression,0.07218	GHR,STEAP4,FASN,IDH1,AGTR1,TBX3
gene_set_query	262	HAND1	0.07248	ARCHS4 Coexpression,0.07248	SMO,ITGB5,HPGD,RHOU,GATA2,TBX3
gene_set_query	263	ZNF132	0.07265	Enrichr Queries,0.07265	THRB,GDF15,IRS1,ZBTB16,ADRB2,AKAP12,GHR,CUX2,CCND1,MYC,ZNF649,ZNF229,PMEPA1,ZNF613,ZNF502,ZNF135,ZSCAN18
gene_set_query	264	PRDM16	0.07281	GTEx Coexpression,0.07281	SLC22A3,ACADL,ITGB5,PMEPA1,IGF1R,GULP1
gene_set_query	265	ARNT	0.07317	Literature ChIP-seq,0.07317	MESP1,VIPR1,THRB,ARHGEF26,CITED2,IRS1,ABHD2,CWH43,IGF1R,SOCS2,PPP3CA,CCND1,SPDEF,ANKRD29,ABCC4,GDF15,PRLR,TBX3,GULP1,AR,ALDH1A3,MLPH,BMPR1B,PDE9A
gene_set_query	266	ZHX2	0.07336	Enrichr Queries,0.07336	NFIX,CITED2,GDF15,IRS1,NEDD4L,IRS2,IQGAP2,ELL2,DHRS3,IGF1R,AKAP12,CCND1,MYC,KLF9,PMEPA1,PDLIM5,PAG1
gene_set_query	267	FOS	0.07407	ReMap ChIP-seq,0.07407	ARHGEF37,IL1R1,DNASE2B,GDF15,ABHD2,SLC2A12,ACSL3,ADRB2,AQP3,RHOD,CLU,DHRS3,SLC25A37,HERC3,CREB3L4,MYC,KLF9,PMEPA1,PDLIM5,ERGIC1,FKBP5
gene_set_query	268	ZNF30	0.07407	Enrichr Queries,0.07407	ARRDC4,SPON2,GDF15,EPHX2,NEDD4L,CROT,AKAP12,SOCS2,ALDH1A3,CCND1,MYC,PMEPA1,ZNF613,RHOU,ZNF502,PAG1,ZSCAN18
gene_set_query	269	ZNF610	0.07479	Enrichr Queries,0.07479	ARRDC4,THRB,CITED2,GDF15,SLC2A12,IRS2,IGF1R,CLGN,AKAP12,SOCS2,MYC,TP53INP1,RHOU,ZNF577,PAG1,ZNF135,ZSCAN18
gene_set_query	270	LHX8	0.0753	GTEx Coexpression,0.0753	PPP3CA,CGREF1,GLYATL2,ZG16B,GNG7,ACSL3
gene_set_query	271	FOXL2	0.0755	Enrichr Queries,0.0755	FOXA1,DLX1,DLX2,GDF15,IRX3,GATA2,HOXB13,HOXA13,CLU,DHRS3,TBX3,HOXA11,HOXA10,ALDH1A3,CCND1,MYC
gene_set_query	272	NANOGP8	0.07555	ARCHS4 Coexpression,0.07555	FOLH1,IDH1,ZNF649,BEND4,ACACA,GULP1
gene_set_query	273	FOXD1	0.07592	GTEx Coexpression,0.07592	PTGFR,MME,CITED2,PRR16,STEAP1,RECK
gene_set_query	274	KLF1	0.07617	ARCHS4 Coexpression,0.07617	SLC25A37,MYC,SLC43A1,MBOAT2,CHPT1,GATA2
gene_set_query	275	HOXD4	0.07654	GTEx Coexpression,0.07654	HOXA10,AR,IRS1,PRLR,FBXL7,HOXA11
gene_set_query	276	EGR4	0.07678	ARCHS4 Coexpression,0.07678	NPDC1,TTR,EPHX2,GC,ELL2,CLU
gene_set_query	277	NRL	0.07692	Enrichr Queries,0.07692	FOXA1,DLX1,DLX2,NFIX,THRB,GDF15,IRS1,ZBTB16,IRS2,GATA2,DHRS3,CUX2,CCND1,MYC,GC,FKBP5
gene_set_query	278	DLX4	0.07764	Enrichr Queries,0.07764	FOXA1,DLX1,DLX2,GDF15,IRS1,ZBTB16,IRX3,GATA2,HOXB13,HOXA13,DHRS3,TBX3,AKAP12,HOXA10,ALDH1A3,CCND1
gene_set_query	279	POU4F3	0.07778	GTEx Coexpression,0.07778	LATS2,ITGB5,ZBTB16,ZNF649,ENDOD1,PMEPA1
gene_set_query	280	ARX	0.07801	ARCHS4 Coexpression,0.07801	DLX1,DLX2,TTR,FAM110B,GC,ELL2
gene_set_query	281	ZXDB	0.07841	GTEx Coexpression,0.07841	CYP39A1,C5,HPN,ANG,GC,ACADSB
gene_set_query	282	RXRG	0.07862	ARCHS4 Coexpression,0.07862	GAMT,MYBPC1,PEBP4,TCEA3,ASB9,PLA1A
gene_set_query	283	IRX1	0.07903	GTEx Coexpression,0.07903	AZGP1,GLYATL2,CCND1,IRX3,IRS2,ADRB2
gene_set_query	284	TCF3	0.07927	Literature ChIP-seq,0.07927	FOXA1,MESP1,ITGB5,CITED2,DOCK8,ENDOD1,KLK3,GATA2,HOXB13,HOXA13,FGFRL1,SH3RF1,SOCS2,CUX2,NETO1,HOMER2,EPHX2,SLC30A4,TBX3,GLUD1,LATS2,FASN,TCEA3,TRIM36,RHOU,FBXL7
gene_set_query	285	ZNF875	0.07965	GTEx Coexpression,0.07965	NPDC1,SLC25A27,NME3,ZNF577,ZNF135,ZSCAN18
gene_set_query	286	TIGD6	0.07985	ARCHS4 Coexpression,0.07985	MESP1,NETO1,DNASE2B,MYO6,STEAP1
gene_set_query	287	ALX1	0.08027	GTEx Coexpression,0.08027	PTGFR,MME,CITED2,PRR16,STEAP1,RECK
gene_set_query	288	MEOX2	0.08047	ARCHS4 Coexpression,0.08047	GHR,NFIX,AGTR1,FGFRL1,FBXL7
gene_set_query	289	MEIS1	0.08048	Enrichr Queries,0.08048	NFIX,CITED2,IRS1,ZBTB16,IRS2,IGF1,GATA2,CLU,DHRS3,TBX3,IGF1R,AKAP12,SOCS2,CCND1,MYC,KLF9
gene_set_query	290	VDR	0.08081	ReMap ChIP-seq,0.08081	GAMT,NPDC1,FOXA1,NFIX,GDF15,IRS1,ABHD2,GATA2,HOXB13,DHRS3,TBX3,HOXA10,SLC25A37,NUDT8,CCND1,CREB3L4,MYC,PMEPA1,ANG,GGT1,ERGIC1
gene_set_query	291	REST	0.08108	ARCHS4 Coexpression,0.08108	NPDC1,AMD1,BEND4,IQGAP2,ATP6V0E2
gene_set_query	292	EMX2	0.08152	GTEx Coexpression,0.08152	HOXA10,GLUD1,ALDH6A1,CTNND2,RAMP1,HOXA11
gene_set_query	293	NR2E1	0.0817	ARCHS4 Coexpression,0.0817	DLX1,ALDH6A1,CTNND2,ATP6V0E2,CLU
gene_set_query	294	THRB	0.08191	Enrichr Queries,0.08191	MME,HPGD,CITED2,IRS1,ZBTB16,NEDD4L,IRS2,IGF1,IQGAP2,SLC4A4,CLU,IGF1R,GHR,CCND1,MYC,KLF9
gene_set_query	295	CXXC5	0.08231	ARCHS4 Coexpression,0.08231	NPDC1,CTNND2,ATP6V0E2,CLU,ZSCAN18
gene_set_query	296	SOX17	0.08276	GTEx Coexpression,0.08276	SOCS2,GHR,ANKRD29,STEAP4,KLF9,AGTR1
gene_set_query	297	MITF	0.08333	Enrichr Queries,0.08333	THRB,MME,HPGD,CITED2,GDF15,NEDD4L,IRS2,IGF1,CLU,DHRS3,TBX3,IGF1R,AKAP12,CCND1,MYC,KLF9
gene_set_query	298	TBX4	0.08339	GTEx Coexpression,0.08339	ANKRD29,VIPR1,IL1R1,GATA2,PAG1,PLA1A
gene_set_query	299	NFIC	0.08354	ARCHS4 Coexpression,0.08354	NFIX,TCEA3,OPLAH,FGFRL1,ERGIC1
gene_set_query	300	EBF2	0.08401	GTEx Coexpression,0.08401	PTGFR,STEAP4,LATS2,CYP2U1,KLF9,FBXL7
gene_set_query	301	HOXC5	0.08405	Enrichr Queries,0.08405	FOXA1,DLX1,DLX2,NFIX,GDF15,ZBTB16,IRX3,GATA2,HOXB13,HOXA13,DHRS3,TBX3,HOXA11,AKAP12,HOXA10,CCND1
gene_set_query	302	MBD4	0.08418	ReMap ChIP-seq,0.08418	SPINK1,IL1R1,HOMER2,GDF15,IRS1,IDH1,HPN,AMD1,NEDD4L,ACSL3,ELL2,PBLD,GLUD1,C5,MYC,ALB,ANG,HMGCS2,RAMP1,MSMB
gene_set_query	303	FIGLA	0.08463	GTEx Coexpression,0.08463	SPINK1,TRPV6,HOMER2,SLC43A1,TMED6,GNMT
gene_set_query	304	ZNF704	0.08476	Enrichr Queries,0.08476	NFIX,ARHGEF26,CITED2,GDF15,ZBTB16,NEDD4L,IRS2,IGF1R,AKAP12,SLC22A23,CCND1,TP53INP1,KLF9,PMEPA1,RHOU,PAG1
gene_set_query	305	GFI1B	0.08477	ARCHS4 Coexpression,0.08477	ABCC4,CHRNA2,EGF,ENDOD1,ARHGAP6
gene_set_query	306	NKX26	0.08525	GTEx Coexpression,0.08525	GLYATL2,NUDT8,ZG16B,LPAR3,CHPT1,PDLIM5
gene_set_query	307	TBX5	0.08538	ARCHS4 Coexpression,0.08538	CCND1,PDLIM5,RECK,FBXL7,TBX3
gene_set_query	308	DACH1	0.08547	Enrichr Queries,0.08547	MME,CITED2,IRS1,ZBTB16,NEDD4L,IRS2,IQGAP2,SLC4A4,CLU,TBX3,IGF1R,AKAP12,SOCS2,GHR,CCND1,MYC
gene_set_query	309	ZNF83	0.0865	GTEx Coexpression,0.0865	NPDC1,SLC25A27,NME3,ZNF577,ZNF135,ZSCAN18
gene_set_query	310	ZFP62	0.08661	ARCHS4 Coexpression,0.08661	IDH1,ZNF649,ZNF502,SH3RF1,PDE9A
gene_set_query	311	ZNF436	0.08689	Enrichr Queries,0.08689	ARRDC4,NFIX,CITED2,IRS1,ZBTB16,NEDD4L,IRS2,CLU,DHRS3,AKAP12,CCND1,MYC,TCEA3,KLF9,PMEPA1,FKBP5
gene_set_query	312	ZNF354C	0.08712	GTEx Coexpression,0.08712	LATS2,CYP2U1,IRS1,PRR16,ZNF502,RECK
gene_set_query	313	MYBL2	0.08754	ReMap ChIP-seq,0.08754	HGD,IL1R1,CITED2,GDF15,IRS1,SLC43A1,ACSL3,ELL2,GCAT,DHRS3,F5,TTR,BDH1,MYC,ALB,PART1,ANG,PDLIM5,SMPDL3A,MSMB
gene_set_query	314	ETV2	0.08761	Enrichr Queries,0.08761	FOXA1,MESP1,DLX1,DLX2,NFIX,GDF15,IRX3,GREB1,GATA2,TBX3,SOCS2,CCND1,MYC,TCEA3,GC,FKBP5
gene_set_query	315	GRHL1	0.08784	ARCHS4 Coexpression,0.08784	HPGD,ENDOD1,CWH43,AQP3,ARHGAP6
gene_set_query	316	TEAD1	0.08845	ARCHS4 Coexpression,0.08845	LATS2,CCND1,ITGB5,IRS1,PDLIM5
gene_set_query	317	KLF11	0.08899	GTEx Coexpression,0.08899	TMEFF2,LATS2,MYC,AGTR1,ADRB2,ATP6V0E2
gene_set_query	318	NKX25	0.08968	ARCHS4 Coexpression,0.08968	SMO,DCXR,IRX3,PDLIM5,HOXA11
gene_set_query	319	NR1D2	0.08974	Enrichr Queries,0.08974	CITED2,GDF15,IRS1,ZBTB16,IRS2,ELL2,CLU,DHRS3,AKAP12,SOCS2,CCND1,MYC,KLF9,PMEPA1,GC,FKBP5
gene_set_query	320	CEBPD	0.09023	GTEx Coexpression,0.09023	STEAP4,LATS2,IL1R1,ZBTB16,KLF9,ATP6V0E2
gene_set_query	321	HOXB7	0.09029	ARCHS4 Coexpression,0.09029	AKAP12,HOXA10,CCND1,DOCK8,HOXA11
gene_set_query	322	ZNF799	0.09046	Enrichr Queries,0.09046	ARRDC4,HPGD,CITED2,GDF15,IRS1,IRS2,DHRS3,SOCS2,CCND1,MYC,TP53INP1,PMEPA1,RHOU,GC,PAG1,FKBP5
gene_set_query	323	KLF10	0.09091	ARCHS4 Coexpression,0.09091	TTR,KLF9,GC,ELL2,TMED6
gene_set_query	324	ZFP2	0.09117	Enrichr Queries,0.09117	NFIX,THRB,MME,CITED2,GDF15,EPHX2,IRS2,KLF15,DHRS3,SOCS2,SLC25A27,CCND1,GNG7,MYO6,GC,FKBP5
gene_set_query	325	ZNF503	0.09188	Enrichr Queries,0.09188	CITED2,GDF15,IRS1,IRX3,IRS2,CLU,DHRS3,AKAP12,SOCS2,CCND1,MYC,FASN,TP53INP1,KLF9,PMEPA1,RHOU
gene_set_query	326	SATB2	0.0921	GTEx Coexpression,0.0921	UGT2B17,HMGCS2,SLC26A3,PDE9A,TRPM4,SLC17A4
gene_set_query	327	TCF21	0.09214	ARCHS4 Coexpression,0.09214	NFIX,IL1R1,HOXB13,RECK,TBX3
gene_set_query	328	SOX4	0.09275	ARCHS4 Coexpression,0.09275	DLX1,DLX2,FAM110B,NEDD4L,TRIM36
gene_set_query	329	DEAF1	0.0933	Enrichr Queries,0.0933	GAMT,NPDC1,NFIX,CITED2,GDF15,ZBTB16,NEDD4L,IRS2,DHRS3,IGF1R,SOCS2,CCND1,MYC,FASN,GC,FKBP5
gene_set_query	330	DLX2	0.09398	ARCHS4 Coexpression,0.09398	DLX1,FAM110B,ZNF229,TRIM36,ATP6V0E2
gene_set_query	331	ARID5B	0.09402	Enrichr Queries,0.09402	IL1R1,CITED2,IRS1,ZBTB16,NEDD4L,IRS2,ELL2,DHRS3,IGF1R,AKAP12,SOCS2,CCND1,MYC,KLF9,PMEPA1,FKBP5
gene_set_query	332	PAX8	0.09459	ARCHS4 Coexpression,0.09459	MAOA,IRS1,PLEKHH1,FGFRL1,TBX3
gene_set_query	333	ZNF443	0.09473	Enrichr Queries,0.09473	ARRDC4,HPGD,CITED2,GDF15,IRS2,ADRB2,IQGAP2,ELL2,CLU,AKAP12,SLC22A23,SOCS2,CCND1,MYC,TP53INP1,RHOU
gene_set_query	334	SCX	0.09521	ARCHS4 Coexpression,0.09521	NPDC1,GDF15,IRX3,OPLAH,ARHGAP6
gene_set_query	335	ZNF75A	0.09544	Enrichr Queries,0.09544	ARRDC4,CITED2,GDF15,IRS1,DOCK8,NEDD4L,IRS2,ELL2,SOCS2,CCND1,MYC,TP53INP1,ZNF229,RHOU,ZNF577,ZSCAN18
gene_set_query	336	BNC2	0.09582	ARCHS4 Coexpression,0.09582	COLEC12,LATS2,HOXB13,RECK,FBXL7
gene_set_query	337	ZNF343	0.09583	GTEx Coexpression,0.09583	LATS2,CTNND2,ZBTB16,ZNF649,KLF9,ZNF502
gene_set_query	338	SIX4	0.09615	Enrichr Queries,0.09615	CITED2,GDF15,IRS1,IRX3,IRS2,CLU,DHRS3,AKAP12,SOCS2,ALDH1A3,CCND1,MYC,FASN,KLF9,PMEPA1,FKBP5
gene_set_query	339	GLIS3	0.09644	ARCHS4 Coexpression,0.09644	TRPV6,IL1R1,PDLIM5,SLC4A4,CLU
gene_set_query	340	THAP12	0.09645	GTEx Coexpression,0.09645	SPINK1,HOMER2,EGF,SLC43A1,SLC4A4,TMED6
gene_set_query	341	SIX2	0.09687	Enrichr Queries,0.09687	FOXA1,COLEC12,DLX1,DLX2,NFIX,MME,CITED2,GDF15,IRX3,IRS2,GATA2,TBX3,AKAP12,ALDH1A3,CCND1,MYC
gene_set_query	342	ISL2	0.09705	ARCHS4 Coexpression,0.09705	HGD,SMO,DCXR,SLC43A1,HOXA11
gene_set_query	343	FOXO4	0.09758	Enrichr Queries,0.09758	NFIX,CITED2,GDF15,IRS1,IRS2,ADRB2,GATA2,CLU,DHRS3,IGF1R,SOCS2,CCND1,MYC,TP53INP1,KLF9,GC
gene_set_query	344	KDM5B	0.09764	ReMap ChIP-seq,0.09764	GAMT,NPDC1,FOXA1,SPON2,DLX1,DLX2,NFIX,DCXR,NME3,GATA2,OPLAH,FGFRL1,HOXA11,HOXA10,NUDT8,CCND1,CREB3L4,MYC,FASN,TRPM4
gene_set_query	345	GSX1	0.09767	ARCHS4 Coexpression,0.09767	DLX1,DLX2,FAM110B,ATP6V0E2,RAMP1
gene_set_query	346	SHOX	0.09828	ARCHS4 Coexpression,0.09828	THRB,ARHGEF26,NEDD4L,PPM1K,BMPR1B
gene_set_query	347	CREB3L2	0.09829	Enrichr Queries,0.09829	NFIX,ITGB5,IL1R1,CITED2,ABHD2,NEDD4L,IRS2,ELL2,IGF1R,AKAP12,SOCS2,CCND1,MYC,KLF9,PMEPA1,FKBP5
gene_set_query	348	DUXA	0.09832	GTEx Coexpression,0.09832	SLC22A3,LATS2,ITGB5,PMEPA1,GULP1
gene_set_query	349	ZEB1	0.09894	GTEx Coexpression,0.09894	LATS2,CYP2U1,PRR16,RECK,FBXL7
gene_set_query	350	ZNF34	0.099	Enrichr Queries,0.099	NPDC1,NFIX,CITED2,GDF15,ZBTB16,NEDD4L,IRS2,OPLAH,DHRS3,SOCS2,CCND1,MYC,TP53INP1,KLF9,PMEPA1,GC
gene_set_query	351	NCOA3	0.09951	ARCHS4 Coexpression,0.09951	FOXA1,MLPH,IRS1,GREB1,SPDEF
gene_set_query	352	FOXS1	0.09956	GTEx Coexpression,0.09956	SLC22A3,ITGB5,ENDOD1,PMEPA1,GULP1
gene_set_query	353	ZNF560	0.1001	ARCHS4 Coexpression,0.1001	IDH1,ZNF649,BEND4,RPS4Y1,GULP1
gene_set_query	354	SMAD4	0.101	ReMap ChIP-seq,0.101	IRS1,GREB1,NEDD4L,MBOAT2,GATA2,HOXB13,DHRS3,TBX3,IGF1R,SOCS2,CUX2,CCND1,MYC,HSBP1L1,PMEPA1,BEND4,PDLIM5,ERGIC1,MSMB
gene_set_query	355	DLX5	0.1014	ARCHS4 Coexpression,0.1014	DLX1,DLX2,FAM110B,TRIM36,ATP6V0E2
gene_set_query	356	DMRT2	0.1019	Enrichr Queries,0.1019	FOXA1,SLC22A3,DLX2,MME,GDF15,ZBTB16,IRX3,IRS2,IGF1,ADRB2,SLC4A4,AKAP12,SOCS2,GHR,ALDH1A3,AGTR1
gene_set_query	357	TAL1	0.102	ARCHS4 Coexpression,0.102	ABCC4,SLC25A37,EGF,ENDOD1,ARHGAP6
gene_set_query	358	ZNF311	0.1021	GTEx Coexpression,0.1021	PTGFR,CITED2,IRS1,ZNF502,ZNF577
gene_set_query	359	TCF24	0.1026	Enrichr Queries,0.1026	FOXA1,MME,HOMER2,GDF15,IRX3,LPAR3,ADRB2,SLC4A4,PLA2G7,SOCS2,GHR,ALDH1A3,TMEFF2,CUX2,STEAP2,PLEKHH1
gene_set_query	360	PURA	0.1026	ARCHS4 Coexpression,0.1026	PPP3CA,NFIX,THRB,ENDOD1,STEAP2
gene_set_query	361	HSF4	0.1027	GTEx Coexpression,0.1027	NPDC1,SLC25A27,NME3,ZNF135,ZSCAN18
gene_set_query	362	ZNF658	0.1033	Enrichr Queries,0.1033	ARRDC4,SLC22A3,VIPR1,CITED2,IRS1,ZBTB16,ADRB2,CLU,DHRS3,CLGN,SOCS2,ALDH1A3,MYC,FASN,TP53INP1,RHOU
gene_set_query	363	EBF1	0.1033	GTEx Coexpression,0.1033	STEAP4,LATS2,ITGB5,AGTR1,FBXL7
gene_set_query	364	SALL4	0.1037	Literature ChIP-seq,0.1037	MME,HOMER2,CITED2,EPHX2,DOCK8,ENDOD1,HOXB13,PLA2G7,HOXA13,KLF15,DHRS3,AKAP12,SOCS2,GLUD1,LATS2,FASN,TCEA3,KLF9,TRIM36,RHOU,PDLIM5
gene_set_query	365	MYRFL	0.1038	ARCHS4 Coexpression,0.1038	MAOA,EPHX2,UGT2B17,PBLD,SLC17A4
gene_set_query	366	TBX2	0.104	Enrichr Queries,0.104	COLEC12,NFIX,ITGB5,GDF15,IRS1,IRX3,GATA2,TBX3,AKAP12,SOCS2,GHR,ALDH1A3,CCND1,MYC,KLF9,PMEPA1
gene_set_query	367	MYB	0.1044	ARCHS4 Coexpression,0.1044	HOXA10,DOCK8,GATA2,IQGAP2,FKBP5
gene_set_query	368	ZNF256	0.1047	Enrichr Queries,0.1047	ARRDC4,CITED2,GDF15,ZBTB16,IRS2,ADRB2,AKAP12,SOCS2,CCND1,MYC,ZNF649,KLF9,ZNF502,GC,ZNF135,ZSCAN18
gene_set_query	369	MSX1	0.1052	GTEx Coexpression,0.1052	SOCS2,COLEC12,STEAP4,IL1R1,FBXL7
gene_set_query	370	GLI2	0.1057	ARCHS4 Coexpression,0.1057	SMO,ITGB5,IRS1,FBXL7,GULP1
gene_set_query	371	ATOH7	0.1063	ARCHS4 Coexpression,0.1063	CPNE4,ANG,ZNF577,SLC17A4,HOXA11
gene_set_query	372	ZNF880	0.1064	GTEx Coexpression,0.1064	SLC22A23,LATS2,ZNF649,PRR16,FBXL7
gene_set_query	373	POU6F1	0.1068	Enrichr Queries,0.1068	NFIX,CITED2,GDF15,IRS1,ZBTB16,NEDD4L,IRS2,CLU,DHRS3,AKAP12,SOCS2,CCND1,MYC,KLF9,PMEPA1,GC
gene_set_query	374	ZNF804A	0.1069	ARCHS4 Coexpression,0.1069	TMEFF2,CUX2,CTNND2,NEDD4L,TRIM36
gene_set_query	375	DPF3	0.1075	ARCHS4 Coexpression,0.1075	MYBPC1,NFIX,PEBP4,TCEA3,PDLIM5
gene_set_query	376	HES2	0.1075	Enrichr Queries,0.1075	FOXA1,HPGD,GDF15,LPAR3,IRS2,AQP3,CLU,DHRS3,AKAP12,ALDH1A3,MLPH,CCND1,MYC,TCEA3,PMEPA1,RHOU
gene_set_query	377	SAFB2	0.1077	GTEx Coexpression,0.1077	NPDC1,SLC25A27,NME3,ZNF135,ZSCAN18
gene_set_query	378	LHX6	0.1081	ARCHS4 Coexpression,0.1081	DLX1,DLX2,FAM110B,TRIM36,ATP6V0E2
gene_set_query	379	SOX10	0.1083	GTEx Coexpression,0.1083	CYP2U1,ARHGEF26,ARHGEF37,ENDOD1,NCAM2
gene_set_query	380	TBX18	0.1089	GTEx Coexpression,0.1089	LATS2,ITGB5,PRR16,ENDOD1,GULP1
gene_set_query	381	SREBF1	0.1095	GTEx Coexpression,0.1095	MCCC2,EPHX2,IDH1,PRLR,TBX3
gene_set_query	382	ZNF580	0.1101	GTEx Coexpression,0.1101	NPDC1,SLC25A27,NME3,ZNF135,ZSCAN18
gene_set_query	383	CEBPB	0.1102	ENCODE ChIP-seq,0.1102	DLX1,ITGB5,GDF15,ACADSB,CYP39A1,SLC25A27,SLC25A37,DHRS7,LATS2,H2AFJ,MYC,STEAP1
gene_set_query	384	MYF6	0.1106	ARCHS4 Coexpression,0.1106	GAMT,MYBPC1,PEBP4,TCEA3,PDLIM5
gene_set_query	385	ZNF578	0.1108	GTEx Coexpression,0.1108	LATS2,MME,CITED2,IRS1,PRR16
gene_set_query	386	ZNF582	0.1111	Enrichr Queries,0.1111	ARRDC4,NFIX,CITED2,GDF15,IRS2,ADRB2,AKAP12,SOCS2,GHR,MYC,ZNF649,TP53INP1,ZNF502,ZNF577,ZNF135,ZSCAN18
gene_set_query	387	IRX2	0.1112	ARCHS4 Coexpression,0.1112	TTR,IRX3,GREB1,GC,SPDEF
gene_set_query	388	SHOX2	0.1114	GTEx Coexpression,0.1114	PTGFR,LATS2,CYP2U1,PRR16,RECK
gene_set_query	389	SEBOX	0.1118	Enrichr Queries,0.1118	STEAP4,MME,GDF15,IRS2,IGF1,CLU,DHRS3,F5,GNMT,AKAP12,SOCS2,TTR,MYC,HMGCS2,GC,FKBP5
gene_set_query	390	ZNF280D	0.112	GTEx Coexpression,0.112	SLC25A27,CYP2U1,ZNF135,FBXL7,GULP1
gene_set_query	391	IRF6	0.1124	ARCHS4 Coexpression,0.1124	ALDH1A3,ARHGEF37,CWH43,AQP3,RHOD
gene_set_query	392	TRERF1	0.1125	Enrichr Queries,0.1125	NFIX,CITED2,GDF15,IRS1,NEDD4L,IRS2,IQGAP2,DHRS3,IGF1R,AKAP12,SOCS2,CCND1,MYC,PMEPA1,PAG1,FKBP5
gene_set_query	393	RARB	0.1126	GTEx Coexpression,0.1126	CYP2U1,ARHGEF26,SLC2A12,FBXL7,ZSCAN18
gene_set_query	394	SP9	0.113	ARCHS4 Coexpression,0.113	DLX1,DLX2,FAM110B,TRIM36,ATP6V0E2
gene_set_query	395	ZNF572	0.1132	Enrichr Queries,0.1132	ARRDC4,MME,GDF15,IRS2,ALDH1A3,MYC,ZNF649,TP53INP1,ZNF229,ZNF613,RHOU,ZNF502,ZNF577,STEAP1,ZNF135,PDE9A
gene_set_query	396	LBX1	0.1136	ARCHS4 Coexpression,0.1136	GAMT,MYBPC1,NFIX,PEBP4,TCEA3
gene_set_query	397	HIF1A	0.1139	GTEx Coexpression,0.1139	MME,IL1R1,PRR16,STEAP1,RECK
gene_set_query	398	HEYL	0.1145	GTEx Coexpression,0.1145	ACADL,ITGB5,PMEPA1,RAMP1,GULP1
gene_set_query	399	TSHZ2	0.1157	GTEx Coexpression,0.1157	ANKRD29,ALDH1A3,STEAP4,AGTR1,FBXL7
gene_set_query	400	ZNF662	0.1161	Enrichr Queries,0.1161	CSGALNACT1,VIPR1,THRB,MME,CITED2,ZBTB16,IGF1R,AKAP12,SOCS2,ALDH1A3,CUX2,PMEPA1,RHOU,PAG1,ZNF135
gene_set_query	401	ST18	0.1167	ARCHS4 Coexpression,0.1167	TTR,TRIM36,GC,ELL2,PLEKHH1
gene_set_query	402	ZNF57	0.1168	Enrichr Queries,0.1168	ARRDC4,SPON2,NFIX,CITED2,GDF15,NEDD4L,IRS2,AQP3,DHRS3,AKAP12,SOCS2,MYC,KLF9,RHOU,FKBP5
gene_set_query	403	NR1H3	0.117	GTEx Coexpression,0.117	GHR,STEAP4,PEX11A,AGTR1,DHRS3
gene_set_query	404	TIGD7	0.1175	Enrichr Queries,0.1175	ARRDC4,CITED2,GDF15,IRS1,NEDD4L,IRS2,DHRS3,SOCS2,CCND1,TP53INP1,KLF9,PMEPA1,RHOU,ZNF577,ZSCAN18
gene_set_query	405	NEUROD1	0.1179	ARCHS4 Coexpression,0.1179	TTR,ARHGEF26,NEDD4L,GC,ELL2
gene_set_query	406	EN2	0.1182	Enrichr Queries,0.1182	FOXA1,DLX1,DLX2,NFIX,GDF15,IRX3,GATA2,TBX3,AKAP12,HOXA10,ALDH1A3,CUX2,CCND1,MYC,PMEPA1
gene_set_query	407	PITX2	0.1186	ARCHS4 Coexpression,0.1186	GAMT,MYBPC1,IDH1,TCEA3,HMGCS2
gene_set_query	408	HOXD1	0.1197	Enrichr Queries,0.1197	FOXA1,DLX1,DLX2,MME,HPGD,GDF15,ZBTB16,IRX3,GATA2,TBX3,HOXA11,AKAP12,HOXA10,ALDH1A3,MYC
gene_set_query	409	SNAI1	0.1201	GTEx Coexpression,0.1201	SOCS2,STEAP4,LATS2,IL1R1,IGF1
gene_set_query	410	FOXE1	0.1204	ARCHS4 Coexpression,0.1204	MAOA,IRS1,PLEKHH1,FGFRL1,TBX3
gene_set_query	411	ZNF226	0.1207	GTEx Coexpression,0.1207	SLC25A27,NME3,ZNF577,ZNF135,ZSCAN18
gene_set_query	412	NEUROD2	0.121	ARCHS4 Coexpression,0.121	THRB,ARHGEF26,NEDD4L,PPM1K,BMPR1B
gene_set_query	413	ZNF418	0.1211	Enrichr Queries,0.1211	ARRDC4,VIPR1,NFIX,ZBTB16,ADRB2,IGF1R,AKAP12,SOCS2,GNG7,ZNF229,ZNF502,ZNF577,PLEKHH1,ZNF135,ZSCAN18
gene_set_query	414	ZNF175	0.1212	ReMap ChIP-seq,0.1212	GAMT,DLX1,DLX2,THRB,IL1R1,GDF15,DCXR,GREB1,OPLAH,ELL2,PGC,FGFRL1,GCAT,MLPH,CREB3L4,FASN,ALB,ANG,PDLIM5
gene_set_query	415	ZNF214	0.1213	GTEx Coexpression,0.1213	CYP2U1,IRS1,ZNF502,RECK,ZNF135
gene_set_query	416	ZNF177	0.1218	Enrichr Queries,0.1218	ARRDC4,SPON2,NFIX,GDF15,ZBTB16,NEDD4L,IRS2,ADRB2,ELL2,SOCS2,CCND1,PMEPA1,ZNF577,ZNF135,ZSCAN18
gene_set_query	417	TP53	0.122	Literature ChIP-seq,0.122	FOXA1,SPON2,DLX1,DLX2,THRB,CITED2,GDF15,ZBTB16,DCXR,IRX3,ADRB2,GATA2,HOXB13,RHOD,HOXA13,HOXA11,HOXA10,AR,LATS2,H2AFJ,KLF9,GC
gene_set_query	418	GTF2IRD2B	0.1226	GTEx Coexpression,0.1226	KLF9,ZNF502,ZNF577,ARHGAP6,KLF15
gene_set_query	419	CREBL2	0.1229	ARCHS4 Coexpression,0.1229	ANKH,MAOA,KLF9,PLA2G7
gene_set_query	420	KLF16	0.1232	GTEx Coexpression,0.1232	PPP3CA,CGREF1,NETO1,CTNND2,GNG7
gene_set_query	421	ESRRB	0.1232	Enrichr Queries,0.1232	THRB,MME,GDF15,ZBTB16,GATA2,KLF15,TBX3,AKAP12,SOCS2,CUX2,CCND1,MYC,TCEA3,KLF9,FKBP5
gene_set_query	422	SIX3	0.1235	ARCHS4 Coexpression,0.1235	ARHGEF26,NEDD4L,PPM1K,BMPR1B
gene_set_query	423	ZNF517	0.1238	GTEx Coexpression,0.1238	SLC25A27,NME3,ATP6V0E2,ZNF135,ZSCAN18
gene_set_query	424	NPAS1	0.1239	Enrichr Queries,0.1239	DLX1,DLX2,NFIX,CITED2,GDF15,ZBTB16,IRX3,IRS2,DHRS3,ALDH1A3,CUX2,CCND1,MYC,FASN,GC
gene_set_query	425	PRDM6	0.1241	ARCHS4 Coexpression,0.1241	COLEC12,CHRNA2,IGF1,PLA2G7
gene_set_query	426	MEOX1	0.1245	GTEx Coexpression,0.1245	GHR,ANKRD29,STEAP4,AGTR1,ADRB2
gene_set_query	427	FOXC2	0.1253	ARCHS4 Coexpression,0.1253	LATS2,CCND1,ITGB5,FGFRL1
gene_set_query	428	ARNT2	0.1254	Enrichr Queries,0.1254	NFIX,MME,GDF15,CTNND2,ZBTB16,NEDD4L,IRS2,CLU,IGF1R,AKAP12,SOCS2,ALDH1A3,CCND1,MYC,PMEPA1
gene_set_query	429	ZNF649	0.1259	ARCHS4 Coexpression,0.1259	IDH1,KLK2,ZNF577,GULP1
gene_set_query	430	ATOH1	0.1263	GTEx Coexpression,0.1263	UGT2B17,SLC26A3,SMPDL3A,PDE9A,TRPM4
gene_set_query	431	NR3C1	0.1271	ENCODE ChIP-seq,0.1271	GGT1,PGC,KLF15,GNMT,FKBP5,MSMB
gene_set_query	432	ZIK1	0.1271	ARCHS4 Coexpression,0.1271	IDH1,ZNF649,ERGIC1,GULP1
gene_set_query	433	SOX1	0.1276	GTEx Coexpression,0.1276	CGREF1,DLX1,CTNND2,NCAM2,ATP6V0E2
gene_set_query	434	ZNF501	0.1278	ARCHS4 Coexpression,0.1278	SLC43A1,TRPM8,ERGIC1,TRPM4
gene_set_query	435	TEAD4	0.1279	ReMap ChIP-seq,0.1279	ABCC4,CITED2,GDF15,ABHD2,NEDD4L,ACSL3,GATA2,CLU,SH3RF1,DHRS3,GULP1,SOCS2,LATS2,CCND1,CREB3L4,MYC,FASN,PMEPA1,ANG
gene_set_query	436	GATA1	0.128	Literature ChIP-seq,0.128	SLC22A3,NFIX,ITGB5,ABHD2,DOCK8,SLC43A1,ENDOD1,NEDD4L,ADRB2,GATA2,IQGAP2,ACACA,IGF1R,CLGN,SCUBE2,SPDEF,SLC17A4,MSMB,GAMT,GALNT7,IL1R1,GRTP1,ZBTB16,IDH1,MBOAT2,ELL2,PGC,SLC22A23,BDH1,AGTR1,RAMP1
gene_set_query	437	ZNF587	0.1282	GTEx Coexpression,0.1282	GALNT7,KRTCAP3,MLPH,CREB3L4,TMPRSS2
gene_set_query	438	ZNF223	0.1284	ARCHS4 Coexpression,0.1284	IDH1,FAM110B,ZNF577,ERGIC1
gene_set_query	439	IRX6	0.1288	GTEx Coexpression,0.1288	GHR,MYC,IRX3,AGTR1,ADRB2
gene_set_query	440	SP7	0.1296	ARCHS4 Coexpression,0.1296	COLEC12,CGREF1,ANKH,ITGB5
gene_set_query	441	SALL1	0.1296	Enrichr Queries,0.1296	NFIX,MME,CITED2,GDF15,ZBTB16,IRX3,IRS2,TBX3,IGF1R,AKAP12,SOCS2,CCND1,MYC,KLF9,FKBP5
gene_set_query	442	ZNF449	0.1301	GTEx Coexpression,0.1301	LATS2,KLF9,ARHGAP6,FBXL7,GULP1
gene_set_query	443	ZBTB41	0.1302	ARCHS4 Coexpression,0.1302	ARRDC4,PTGFR,TTR,ELL2
gene_set_query	444	ZNF502	0.1303	Enrichr Queries,0.1303	ARRDC4,CSGALNACT1,THRB,GDF15,ADRB2,AKAP12,SOCS2,GHR,MYC,TP53INP1,ZNF229,PMEPA1,ZNF577,ZNF135,ZSCAN18
gene_set_query	445	NFIB	0.1311	Enrichr Queries,0.1311	NFIX,IRS1,ZBTB16,NEDD4L,IRS2,IGF1,CLU,IGF1R,AKAP12,SOCS2,GHR,CCND1,MYC,KLF9,PMEPA1
gene_set_query	446	GLMP	0.1313	GTEx Coexpression,0.1313	SPON2,MME,IDH1,STEAP1,ERGIC1
gene_set_query	447	ZSCAN23	0.1314	ARCHS4 Coexpression,0.1314	SLC25A27,DLX1,ZNF649,TRIM36
gene_set_query	448	DLX1	0.1318	Enrichr Queries,0.1318	FOXA1,DLX2,NFIX,THRB,CITED2,GDF15,ZBTB16,IRX3,GATA2,AKAP12,SOCS2,ALDH1A3,CCND1,MYC,PMEPA1
gene_set_query	449	ZNF883	0.1321	ARCHS4 Coexpression,0.1321	IDH1,FAM110B,TRIM36,GULP1
gene_set_query	450	ZSCAN5A	0.1325	Enrichr Queries,0.1325	NFIX,CITED2,GDF15,IRS1,NEDD4L,IRS2,IQGAP2,ELL2,IGF1R,AKAP12,GHR,CCND1,MYC,PMEPA1,FKBP5
gene_set_query	451	PPARD	0.1325	GTEx Coexpression,0.1325	SLC22A23,CWH43,AQP3,RHOD,PLEKHH1
gene_set_query	452	ZGLP1	0.1327	ARCHS4 Coexpression,0.1327	CHRNA2,EGF,ENDOD1,ARHGAP6
gene_set_query	453	ZNF134	0.1333	ARCHS4 Coexpression,0.1333	IDH1,ZNF649,BEND4,GULP1
gene_set_query	454	ZNF112	0.1339	ARCHS4 Coexpression,0.1339	DLX2,TRIM36,ZNF502,ZNF135
gene_set_query	455	MSANTD3	0.1345	ARCHS4 Coexpression,0.1345	ITGB5,EGF,ENDOD1,ARHGAP6
gene_set_query	456	ZNF565	0.1346	Enrichr Queries,0.1346	SPON2,NFIX,CITED2,ZBTB16,IRX3,IRS2,ELL2,DHRS3,SLC22A23,SOCS2,MYC,PMEPA1,RHOU,PDE9A,FKBP5
gene_set_query	457	AHR	0.1347	ReMap ChIP-seq,0.1347	FOXA1,MESP1,IRS1,ABHD2,IDH1,TMPRSS2,GATA2,AQP3,RHOD,ALDH1A3,AZGP1,MLPH,CREB3L4,TCEA3,PMEPA1,ANG,HMGCS2,PLEKHH1,SLC17A4
gene_set_query	458	CSRNP3	0.135	GTEx Coexpression,0.135	PPP3CA,CGREF1,NETO1,CTNND2,NCAM2
gene_set_query	459	TFAP2A	0.1353	Enrichr Queries,0.1353	FOXA1,NFIX,CITED2,GDF15,IRX3,GATA2,TBX3,IGF1R,HOXA10,SOCS2,GHR,ALDH1A3,CCND1,MYC,PMEPA1
gene_set_query	460	MTERF2	0.1357	ARCHS4 Coexpression,0.1357	TTR,MYO6,ZNF135,ERGIC1
gene_set_query	461	TSHZ1	0.136	Enrichr Queries,0.136	NFIX,CITED2,IRS1,ZBTB16,IRS2,IQGAP2,DHRS3,IGF1R,AKAP12,SOCS2,CCND1,KLF9,PMEPA1,PAG1,FKBP5
gene_set_query	462	ZNF486	0.1363	GTEx Coexpression,0.1363	CSGALNACT1,IRS1,CROT,PLEKHH1,FGFRL1
gene_set_query	463	ZFP1	0.1364	ARCHS4 Coexpression,0.1364	DLX1,FAM110B,TRIM36,PAG1
gene_set_query	464	TCF7L1	0.1368	Enrichr Queries,0.1368	NFIX,MME,ITGB5,CITED2,IRS1,ZBTB16,IRS2,CLU,DHRS3,AKAP12,SOCS2,CCND1,MYC,KLF9,PMEPA1
gene_set_query	465	ZFX	0.1369	GTEx Coexpression,0.1369	HOXA10,AR,IRS1,ZNF502,ARHGAP6
gene_set_query	466	SOX11	0.137	ARCHS4 Coexpression,0.137	DLX1,DLX2,FAM110B,TRIM36
gene_set_query	467	ETS2	0.1375	Enrichr Queries,0.1375	CITED2,GDF15,ZBTB16,IRS2,ADRB2,ELL2,CLU,DHRS3,AKAP12,SOCS2,CCND1,MYC,KLF9,PMEPA1,FKBP5
gene_set_query	468	FOSL2	0.138	ReMap ChIP-seq,0.138	NPDC1,FOXA1,IL1R1,GDF15,ABHD2,DCXR,HPN,AQP3,RHOD,CLU,SH3RF1,DHRS3,MLPH,CCND1,CREB3L4,MYC,KLF9,PMEPA1,ANG
gene_set_query	469	ZHX3	0.1382	ARCHS4 Coexpression,0.1382	NFIX,CTNND2,KLF9,CLU
gene_set_query	470	MLXIP	0.1388	ARCHS4 Coexpression,0.1388	MYBPC1,TCEA3,OPLAH,TRPM4
gene_set_query	471	ZNF770	0.14	ARCHS4 Coexpression,0.14	IDH1,ZNF649,BEND4,GULP1
gene_set_query	472	BCL6	0.1403	Enrichr Queries,0.1403	IL1R1,CITED2,GDF15,IRS1,ZBTB16,IRS2,ADRB2,ELL2,CLU,DHRS3,SOCS2,CCND1,MYC,KLF9,FKBP5
gene_set_query	473	ZNF823	0.1406	GTEx Coexpression,0.1406	GRTP1,CNGA1,CWH43,AQP3,RHOD
gene_set_query	474	SMYD3	0.1407	ARCHS4 Coexpression,0.1407	HGD,ARHGAP6,GCAT,ERGIC1
gene_set_query	475	ZFP69B	0.1413	ARCHS4 Coexpression,0.1413	DLX1,DLX2,ZNF649,TRIM36
gene_set_query	476	ZNF250	0.1417	Enrichr Queries,0.1417	NFIX,CITED2,GDF15,IRS1,NEDD4L,IRS2,DHRS3,AKAP12,SOCS2,CCND1,MYC,FASN,TP53INP1,PMEPA1,FKBP5
gene_set_query	477	ZNF844	0.1419	GTEx Coexpression,0.1419	ZNF649,ZNF502,ZNF577,ZNF135,IGF1R
gene_set_query	478	XPA	0.1425	Enrichr Queries,0.1425	CITED2,GDF15,IRS1,ZBTB16,NEDD4L,IRS2,CLU,IGF1R,AKAP12,SOCS2,CCND1,MYC,FASN,KLF9,FKBP5
gene_set_query	479	STAT5A	0.1425	GTEx Coexpression,0.1425	GHR,STEAP4,PEX11A,FASN,AGTR1
gene_set_query	480	DLX6	0.1437	ARCHS4 Coexpression,0.1437	DLX1,DLX2,FAM110B,TRIM36
gene_set_query	481	TBX20	0.1437	GTEx Coexpression,0.1437	PEBP4,LPAR3,PPM1K,PDLIM5,CLGN
gene_set_query	482	ZBTB7A	0.1441	ENCODE ChIP-seq,0.1441	MESP1,DLX2,THRB,DOCK8,SLC43A1,TMPRSS2,LPAR3,CROT,IQGAP2,HOXB13,AQP3,HOXA13,CLU,SH3RF1,IGF1R,MYC,MYO6,PLEKHH1,ARHGEF37,HOMER2,GDF15,SLC30A4,MBOAT2,SLC25A37,NUDT8,SMO,CHPT1,RAMP1
gene_set_query	483	NR4A3	0.1444	GTEx Coexpression,0.1444	AKAP12,LATS2,PEBP4,PDLIM5,ELL2
gene_set_query	484	KLF5	0.1446	Enrichr Queries,0.1446	MME,CITED2,GDF15,NEDD4L,IRS2,AQP3,CLU,TBX3,AKAP12,SOCS2,ALDH1A3,CCND1,MYC,KLF9,PMEPA1
gene_set_query	485	ZNF197	0.1448	ReMap ChIP-seq,0.1448	GAMT,NPDC1,COLEC12,SPON2,MESP1,CGREF1,NFIX,IL1R1,GDF15,EGF,ENDOD1,OPLAH,ACACA,IGF1R,SLC25A37,SMO,CREB3L4,FASN
gene_set_query	486	RARG	0.1453	Enrichr Queries,0.1453	NFIX,ITGB5,CITED2,GDF15,IRS1,GATA2,DHRS3,TBX3,AKAP12,SOCS2,CCND1,MYC,KLF9,PMEPA1,GC
gene_set_query	487	ZNF444	0.1456	GTEx Coexpression,0.1456	HPN,NME3,SLC4A4,GCAT,ZSCAN18
gene_set_query	488	ZNF470	0.1467	Enrichr Queries,0.1467	ARRDC4,MME,CITED2,NEDD4L,IRS2,AKAP12,SOCS2,CCND1,ZNF649,BEND4,ZNF613,ZNF502,ZNF577,ZNF135,ZSCAN18
gene_set_query	489	FOSL1	0.1468	ARCHS4 Coexpression,0.1468	ALDH1A3,CCND1,IRS1,FGFRL1
gene_set_query	490	TET2	0.1474	ARCHS4 Coexpression,0.1474	SLC25A37,STEAP4,DOCK8,BMPR1B
gene_set_query	491	ZFP3	0.1474	Enrichr Queries,0.1474	ARRDC4,VIPR1,THRB,CITED2,GDF15,IRS2,CLU,DHRS3,SOCS2,GHR,BDH1,CCND1,MYC,KLF9,FKBP5
gene_set_query	492	OLIG3	0.1475	GTEx Coexpression,0.1475	SPINK1,TRPV6,HOMER2,SLC43A1,TMED6
gene_set_query	493	ZSCAN26	0.1481	GTEx Coexpression,0.1481	NPDC1,SLC25A27,NME3,ZNF135,ZSCAN18
gene_set_query	494	ZNF300	0.1486	ARCHS4 Coexpression,0.1486	DLX1,DLX2,FAM110B,TRIM36
gene_set_query	495	KAT7	0.1493	ARCHS4 Coexpression,0.1493	SPINK1,ARHGEF26,NEDD4L,PPM1K
gene_set_query	496	POU3F2	0.1493	GTEx Coexpression,0.1493	GLUD1,CTNND2,NCAM2,ATP6V0E2
gene_set_query	497	PITX1	0.1496	Enrichr Queries,0.1496	FOXA1,NFIX,CITED2,GDF15,ZBTB16,IRX3,IRS2,AQP3,TBX3,HOXA10,SOCS2,ALDH1A3,CCND1,MYC,PMEPA1
gene_set_query	498	ZNF76	0.15	GTEx Coexpression,0.15	SLC25A27,NME3,ZNF577,ZNF135
gene_set_query	499	ZNF114	0.1503	Enrichr Queries,0.1503	ARRDC4,MME,HPGD,GDF15,IRS1,GREB1,NEDD4L,CLU,DHRS3,AKAP12,SOCS2,ALDH1A3,CCND1,PMEPA1,PAG1
gene_set_query	500	SOX12	0.1506	GTEx Coexpression,0.1506	SLC25A27,NME3,ZNF135,ZSCAN18
gene_set_query	501	SOX6	0.1511	ARCHS4 Coexpression,0.1511	DLX1,SLC25A37,DLX2,FAM110B
gene_set_query	502	EGR1	0.1512	GTEx Coexpression,0.1512	SOCS2,CITED2,MYC,KLF9
gene_set_query	503	DLX3	0.1517	Enrichr Queries,0.1517	FOXA1,DLX1,DLX2,HPGD,CITED2,GDF15,IRX3,ADRB2,GATA2,AQP3,DHRS3,TBX3,ALDH1A3,CCND1,MYC
gene_set_query	504	PRDM14	0.1523	ARCHS4 Coexpression,0.1523	IDH1,ZNF649,BEND4,GULP1
gene_set_query	505	EGR2	0.1524	Enrichr Queries,0.1524	IL1R1,CITED2,GDF15,IRS2,IGF1,ADRB2,PLA2G7,CLU,DHRS3,AKAP12,SOCS2,CCND1,MYC,KLF9,PMEPA1
gene_set_query	506	IRF1	0.1524	Literature ChIP-seq,0.1524	AKAP12,GLYATL1,STEAP4,MLPH,HPGD,ZNF502,TBX3
gene_set_query	507	ZNF140	0.1525	GTEx Coexpression,0.1525	SLC25A27,ZNF502,ZNF577,ZNF135
gene_set_query	508	HOXB4	0.1531	Enrichr Queries,0.1531	FOXA1,NFIX,GDF15,ZBTB16,IRX3,IRS2,GATA2,DHRS3,TBX3,AKAP12,HOXA10,ALDH1A3,CCND1,MYC,PMEPA1
gene_set_query	509	VAX2	0.1536	ARCHS4 Coexpression,0.1536	GDF15,ATP6V0E2,RHOD,GCAT
gene_set_query	510	PATZ1	0.1537	GTEx Coexpression,0.1537	NME3,PLEKHH1,FGFRL1,ZNF135
gene_set_query	511	ZNF233	0.1538	Enrichr Queries,0.1538	ARRDC4,CSGALNACT1,VIPR1,THRB,CITED2,GDF15,NEDD4L,IQGAP2,CLGN,GHR,TP53INP1,ZNF229,RHOU,ZNF502,ZNF577
gene_set_query	512	HSF2	0.1542	ARCHS4 Coexpression,0.1542	DLX1,DLX2,TRIM36,ERGIC1
gene_set_query	513	HMX1	0.1543	GTEx Coexpression,0.1543	GLUD1,CTNND2,NCAM2,ATP6V0E2
gene_set_query	514	ZNF395	0.1546	Enrichr Queries,0.1546	ITGB5,CITED2,GDF15,IRS1,NEDD4L,IRS2,CLU,DHRS3,IGF1R,SOCS2,CCND1,MYC,TP53INP1,KLF9,FKBP5
gene_set_query	515	ZFP28	0.1553	Enrichr Queries,0.1553	ARRDC4,COLEC12,MME,GDF15,IRS1,ZBTB16,NEDD4L,IRS2,IGF1R,AKAP12,SOCS2,GHR,CCND1,MYC,ZSCAN18
gene_set_query	516	ZFP42	0.1554	ARCHS4 Coexpression,0.1554	GRTP1,IDH1,ZNF649,GULP1
gene_set_query	517	CC2D1A	0.1556	GTEx Coexpression,0.1556	SLC22A23,KRTCAP3,LATS2,HSBP1L1
gene_set_query	518	ATF7	0.156	ARCHS4 Coexpression,0.156	NFIX,ABHD2,CLU,FKBP5
gene_set_query	519	ZFHX4	0.1562	GTEx Coexpression,0.1562	PTGFR,CYP2U1,RECK,FBXL7
gene_set_query	520	NEUROD6	0.1566	ARCHS4 Coexpression,0.1566	CTNND2,FAM110B,NEDD4L,TRIM36
gene_set_query	521	ZNF516	0.1567	Enrichr Queries,0.1567	CITED2,GDF15,IRS1,ABHD2,NEDD4L,IRS2,DHRS3,IGF1R,AKAP12,CCND1,MYC,TP53INP1,KLF9,PMEPA1,FKBP5
gene_set_query	522	MXI1	0.1572	ARCHS4 Coexpression,0.1572	SLC25A37,CTNND2,DOCK8,MBOAT2
gene_set_query	523	SETBP1	0.1574	Enrichr Queries,0.1574	NFIX,MME,CITED2,IRS1,ZBTB16,NEDD4L,IRS2,IGF1,IQGAP2,SLC4A4,IGF1R,AKAP12,SOCS2,KLF9,PMEPA1
gene_set_query	524	GBX2	0.1574	GTEx Coexpression,0.1574	PPP3CA,CTNND2,GNG7,ATP6V0E2
gene_set_query	525	HES4	0.1579	ARCHS4 Coexpression,0.1579	NPDC1,SMO,ZSCAN18,HOXA11
gene_set_query	526	MZF1	0.1581	GTEx Coexpression,0.1581	NPDC1,SLC25A27,NME3,ZNF135
gene_set_query	527	AEBP1	0.1585	ARCHS4 Coexpression,0.1585	NFIX,ITGB5,IL1R1,RECK
gene_set_query	528	ZNF774	0.1588	Enrichr Queries,0.1588	ARRDC4,NFIX,THRB,GDF15,ABHD2,ZBTB16,IRS2,KLF15,IGF1R,SLC22A23,TCEA3,TP53INP1,KLF9,RHOU,PAG1
gene_set_query	529	FEZF2	0.1593	GTEx Coexpression,0.1593	NETO1,CTNND2,NCAM2,ATP6V0E2
gene_set_query	530	ZNF792	0.1597	ARCHS4 Coexpression,0.1597	EGF,DOCK8,IQGAP2,ARHGAP6
gene_set_query	531	VAX1	0.1599	GTEx Coexpression,0.1599	GLUD1,PPP3CA,CTNND2,GNG7
gene_set_query	532	KLF13	0.1603	Enrichr Queries,0.1603	NFIX,CITED2,ZBTB16,NEDD4L,IRS2,DHRS3,IGF1R,AKAP12,SOCS2,CCND1,MYC,FASN,KLF9,PMEPA1,FKBP5
gene_set_query	533	LHX2	0.1605	GTEx Coexpression,0.1605	GLUD1,ALDH6A1,CTNND2,NCAM2
gene_set_query	534	YBX3	0.1609	ARCHS4 Coexpression,0.1609	SLC25A37,MYBPC1,PEBP4,TCEA3
gene_set_query	535	ZNF763	0.161	Enrichr Queries,0.161	ARRDC4,NFIX,CITED2,GDF15,ZBTB16,IRS2,DHRS3,IGF1R,AKAP12,SOCS2,TP53INP1,TRIM36,RHOU,ZNF577,ZSCAN18
gene_set_query	536	JUND	0.161	ENCODE ChIP-seq,0.161	DLX1,NFIX,HOXB13,ERGIC1,SLC17A4
gene_set_query	537	FOXB2	0.1615	ARCHS4 Coexpression,0.1615	FASN,KLF15,PDE9A,TRPM4
gene_set_query	538	SATB1	0.1617	Enrichr Queries,0.1617	THRB,MME,CITED2,ZBTB16,IRS2,IQGAP2,CLU,IGF1R,AKAP12,SOCS2,GHR,CCND1,MYC,KLF9,PMEPA1
gene_set_query	539	NEUROG3	0.1618	GTEx Coexpression,0.1618	NETO1,CPNE4,UGT2B17,ATP6V0E2
gene_set_query	540	LIN28A	0.1622	ARCHS4 Coexpression,0.1622	SMO,ZNF649,BEND4,GULP1
gene_set_query	541	ZNF692	0.1624	GTEx Coexpression,0.1624	NPDC1,SLC25A27,NME3,ZNF135
gene_set_query	542	PITX3	0.1628	ARCHS4 Coexpression,0.1628	GAMT,MYBPC1,PEBP4,TCEA3
gene_set_query	543	ZNF415	0.1631	Enrichr Queries,0.1631	ARRDC4,CSGALNACT1,COLEC12,CITED2,ZBTB16,NEDD4L,IRS2,CLU,CLGN,AKAP12,SOCS2,GHR,PMEPA1,ZNF135,ZSCAN18
gene_set_query	544	ZNF74	0.1634	ARCHS4 Coexpression,0.1634	DLX1,DLX2,USP54,FAM110B
gene_set_query	545	GRHL3	0.164	ARCHS4 Coexpression,0.164	ARHGEF37,CWH43,AQP3,RHOD
gene_set_query	546	ZNF428	0.1643	GTEx Coexpression,0.1643	CGREF1,CTNND2,NCAM2,ATP6V0E2
gene_set_query	547	GSC	0.1645	Enrichr Queries,0.1645	FOXA1,COLEC12,DLX1,DLX2,MME,GDF15,IRX3,GATA2,HOXB13,HOXA13,TBX3,HOXA10,ALDH1A3,MYC
gene_set_query	548	ZIC3	0.1646	ARCHS4 Coexpression,0.1646	SMO,IDH1,ZNF649,GULP1
gene_set_query	549	PRDM1	0.165	ReMap ChIP-seq,0.165	CGREF1,ANKRD29,NFIX,IL1R1,CITED2,GDF15,RHOD,SLC25A37,CCND1,NETO1,MYC,PEBP4,KLF9,PDLIM5,SLC26A3,FKBP5,NKX3-1
gene_set_query	550	ZNF878	0.1652	ARCHS4 Coexpression,0.1652	IDH1,ZNF649,AMD1,GULP1
gene_set_query	551	ZNF618	0.1661	GTEx Coexpression,0.1661	ACADL,IRS1,IGF1R,GULP1
gene_set_query	552	ZNF331	0.1665	ARCHS4 Coexpression,0.1665	TTR,CYP4F8,GC,ELL2
gene_set_query	553	ZNF208	0.1668	GTEx Coexpression,0.1668	PPM1K,RAMP1,ZNF135,ZSCAN18
gene_set_query	554	BACH2	0.1671	ARCHS4 Coexpression,0.1671	ITGB5,DOCK8,PPM1K,PAG1
gene_set_query	555	PRDM5	0.1674	Enrichr Queries,0.1674	THRB,MME,IL1R1,IRS1,ZBTB16,NEDD4L,IQGAP2,SLC4A4,GULP1,AKAP12,CCND1,MYC,BMPR1B,FKBP5
gene_set_query	556	POU3F3	0.1674	GTEx Coexpression,0.1674	TMEFF2,CTNND2,NCAM2,ATP6V0E2
gene_set_query	557	NKX32	0.1677	ARCHS4 Coexpression,0.1677	SMO,UGT2B17,FGFRL1,HOXA11
gene_set_query	558	AIRE	0.168	GTEx Coexpression,0.168	DLX1,TMEFF2,GRIN3A,NCAM2
gene_set_query	559	TFAP2B	0.1688	Enrichr Queries,0.1688	FOXA1,DLX1,DLX2,NFIX,MME,IRS1,ZBTB16,IRX3,IGF1,TBX3,AKAP12,ALDH1A3,CUX2,CCND1
gene_set_query	560	OVOL1	0.1689	ARCHS4 Coexpression,0.1689	CWH43,AQP3,RHOD,TBX3
gene_set_query	561	ZNF133	0.1693	GTEx Coexpression,0.1693	NPDC1,SLC25A27,NME3,ZNF135
gene_set_query	562	THAP7	0.1695	ARCHS4 Coexpression,0.1695	NUDT8,DCXR,NME3,GCAT
gene_set_query	563	MEIS2	0.1699	GTEx Coexpression,0.1699	PPP3CA,GNG7,RAMP1,ZSCAN18
gene_set_query	564	ZNF599	0.1705	GTEx Coexpression,0.1705	CCDC74B,ZNF502,ZNF577,ZNF135
gene_set_query	565	SETDB1	0.1707	Literature ChIP-seq,0.1707	COLEC12,MAOA,IRS2,GATA2,OPLAH,IGF1R,AKAP12,SOCS2,H2AFJ,MYC,NCAM2,ATP6V0E2,TRPM4,MCCC2,GAMT,GRTP1,DCXR,IRX3,ELL2,RHOD,PGC,GCAT,TBX3,GLUD1,NUDT8,MLPH,FASN,TCEA3,KLF9,RHOU,PDE9A
gene_set_query	566	HES6	0.1709	Enrichr Queries,0.1709	CITED2,GDF15,IDH1,IRS2,CLU,DHRS3,SOCS2,CCND1,MYC,FASN,PMEPA1,GC,RAMP1,FKBP5
gene_set_query	567	POU3F4	0.1714	ARCHS4 Coexpression,0.1714	DLX1,DLX2,CTNND2,TRIM36
gene_set_query	568	HOXB3	0.1717	Enrichr Queries,0.1717	FOXA1,NFIX,GDF15,IRX3,GATA2,DHRS3,TBX3,AKAP12,HOXA10,SOCS2,ALDH1A3,CCND1,MYC,PMEPA1
gene_set_query	569	NCOA2	0.1717	ReMap ChIP-seq,0.1717	NPDC1,FOXA1,PSCA,GDF15,ZG16B,ABHD2,TMPRSS2,AQP3,RHOD,PRLR,SOCS2,AZGP1,MLPH,CCND1,TP53INP1,PMEPA1,MSMB
gene_set_query	570	HIC1	0.1717	GTEx Coexpression,0.1717	COLEC12,SPON2,ANKRD29,FBXL7
gene_set_query	571	MYCN	0.1724	Enrichr Queries,0.1724	CITED2,IRS1,ZBTB16,IRX3,IRS2,IGF1,GATA2,TBX3,IGF1R,AKAP12,SOCS2,CCND1,MYC,KLF9
gene_set_query	572	MAFA	0.1726	ARCHS4 Coexpression,0.1726	GAMT,MYBPC1,PEBP4,TCEA3
gene_set_query	573	NPAS3	0.173	GTEx Coexpression,0.173	GLUD1,ALDH6A1,CTNND2,NCAM2
gene_set_query	574	PBX1	0.1731	Enrichr Queries,0.1731	NFIX,THRB,CITED2,IRS1,NEDD4L,IRS2,CLU,DHRS3,IGF1R,AKAP12,SOCS2,CCND1,MYC,PMEPA1
gene_set_query	575	HEY2	0.1732	ARCHS4 Coexpression,0.1732	SMO,IDH1,DOCK8,FBXL7
gene_set_query	576	SCMH1	0.1738	ARCHS4 Coexpression,0.1738	NFIX,TCEA3,OPLAH,ACACA
gene_set_query	577	ZNF211	0.1742	GTEx Coexpression,0.1742	NPDC1,SLC25A27,NME3,ZNF135
gene_set_query	578	GBX1	0.1744	ARCHS4 Coexpression,0.1744	GAMT,MYBPC1,PEBP4,TCEA3
gene_set_query	579	ZNF362	0.1745	Enrichr Queries,0.1745	NFIX,CITED2,GDF15,IRS2,DHRS3,IGF1R,SOCS2,CCND1,MYC,FASN,TP53INP1,KLF9,PMEPA1,GC
gene_set_query	580	SALL3	0.1749	GTEx Coexpression,0.1749	GLUD1,ALDH6A1,CTNND2,NCAM2
gene_set_query	581	ZSCAN10	0.1751	ARCHS4 Coexpression,0.1751	SMO,ZNF649,BEND4,GULP1
gene_set_query	582	RFX8	0.1755	GTEx Coexpression,0.1755	MME,PRR16,STEAP1,RECK
gene_set_query	583	SRY	0.1757	ARCHS4 Coexpression,0.1757	MCCC2,CCDC74B,RPS4Y1,KLF15
gene_set_query	584	ZBTB20	0.1759	Enrichr Queries,0.1759	NFIX,ZBTB16,NEDD4L,IRS2,IGF1,SLC4A4,CLU,DHRS3,IGF1R,AKAP12,CCND1,KLF9,PMEPA1,PDLIM5
gene_set_query	585	ELK3	0.1763	ARCHS4 Coexpression,0.1763	ITGB5,TP53INP1,ENDOD1,ARHGAP6
gene_set_query	586	SIX5	0.1766	Enrichr Queries,0.1766	NFIX,CITED2,GDF15,IRS1,IRX3,IRS2,GATA2,FGFRL1,DHRS3,CCND1,MYC,FASN,KLF9,GC
gene_set_query	587	ZNF154	0.1767	GTEx Coexpression,0.1767	SLC25A27,PLEKHH1,ZNF135,ZSCAN18
gene_set_query	588	ARID3A	0.1769	ARCHS4 Coexpression,0.1769	NFIX,ARHGEF26,NEDD4L,PPM1K
gene_set_query	589	ZNF697	0.1773	GTEx Coexpression,0.1773	MME,IL1R1,PRR16,STEAP1
gene_set_query	590	ZNF358	0.1774	Enrichr Queries,0.1774	GAMT,NPDC1,NFIX,CITED2,GDF15,NME3,IRS2,DHRS3,FASN,TP53INP1,KLF9,GC,ATP6V0E2,RAMP1
gene_set_query	591	ASCL1	0.1775	ARCHS4 Coexpression,0.1775	DLX1,DLX2,MYC,KLF15
gene_set_query	592	GLIS2	0.178	GTEx Coexpression,0.178	ITGB5,PMEPA1,FBXL7,GULP1
gene_set_query	593	HIVEP2	0.1781	Enrichr Queries,0.1781	NFIX,CITED2,IRS1,NEDD4L,IRS2,ELL2,IGF1R,AKAP12,SOCS2,PPP3CA,CCND1,MYC,KLF9,PMEPA1
gene_set_query	594	NFE2L3	0.1781	ARCHS4 Coexpression,0.1781	GALNT7,AMD1,ACACA,GULP1
gene_set_query	595	ETV1	0.1785	ReMap ChIP-seq,0.1785	NPDC1,GALNT7,DLX1,GDF15,DCXR,SLC43A1,HOXB13,OPLAH,PGC,SOCS2,NUDT8,CREB3L4,FASN,KLF9,ERGIC1,PDE9A,FKBP5
gene_set_query	596	ZBTB24	0.1788	Enrichr Queries,0.1788	CITED2,GDF15,ABHD2,AMD1,NEDD4L,IRS2,ELL2,IGF1R,AKAP12,SOCS2,CCND1,MYC,PMEPA1,FKBP5
gene_set_query	597	NR2F1	0.1792	GTEx Coexpression,0.1792	NPDC1,SLC25A27,NCAM2,BMPR1B
gene_set_query	598	ZBTB38	0.1795	Enrichr Queries,0.1795	CITED2,GDF15,IRS1,ABHD2,NEDD4L,IRS2,ELL2,IGF1R,AKAP12,CCND1,MYC,KLF9,PMEPA1,PDLIM5
gene_set_query	599	FOXJ1	0.18	ARCHS4 Coexpression,0.18	SLC22A23,ABHD2,AQP3,MSMB
gene_set_query	600	ZNF783	0.1802	Enrichr Queries,0.1802	NFIX,GDF15,SLC43A1,NEDD4L,IRS2,DHRS3,IGF1R,AKAP12,SLC25A37,CCND1,MYC,FASN,TP53INP1,PMEPA1
gene_set_query	601	ZNF366	0.1805	GTEx Coexpression,0.1805	GHR,ANKRD29,STEAP4,AGTR1
gene_set_query	602	FOXN1	0.1806	ARCHS4 Coexpression,0.1806	ARHGEF37,CWH43,AQP3,RHOD
gene_set_query	603	ZNF471	0.1809	Enrichr Queries,0.1809	PTGFR,NFIX,MME,ZBTB16,NEDD4L,IGF1R,AKAP12,GHR,ALDH1A3,TP53INP1,KLF9,ZNF577,ZNF135,ZSCAN18
gene_set_query	604	ARID3B	0.1812	ARCHS4 Coexpression,0.1812	NFIX,SMO,BEND4,GULP1
gene_set_query	605	TSC22D1	0.1823	GTEx Coexpression,0.1823	CTNND2,NCAM2,BMPR1B,ZSCAN18
gene_set_query	606	JDP2	0.1823	Enrichr Queries,0.1823	IL1R1,CITED2,GDF15,IRS2,CLU,DHRS3,AKAP12,CCND1,MYC,KLF9,PMEPA1,RHOU,GC,FKBP5
gene_set_query	607	KLF7	0.183	ARCHS4 Coexpression,0.183	CTNND2,FAM110B,MBOAT2,TRIM36
gene_set_query	608	ZNF680	0.1836	GTEx Coexpression,0.1836	GLUD1,ALDH6A1,CTNND2,NCAM2
gene_set_query	609	ZNF284	0.1838	Enrichr Queries,0.1838	ARRDC4,GDF15,IRS2,CLU,DHRS3,MYC,TP53INP1,KLF9,ZNF229,ZNF613,ZNF502,ZNF577,PAG1,ZSCAN18
gene_set_query	610	ZNF514	0.1842	GTEx Coexpression,0.1842	SLC25A27,SMO,ZNF577,ZNF135
gene_set_query	611	FOXO6	0.1848	GTEx Coexpression,0.1848	SLC25A27,NME3,ZNF135,ZSCAN18
gene_set_query	612	MAFB	0.1852	Enrichr Queries,0.1852	COLEC12,IL1R1,CITED2,GDF15,ZBTB16,IRS2,IGF1,PLA2G7,CLU,DHRS3,CCND1,MYC,PMEPA1,FKBP5
gene_set_query	613	ZNF592	0.1852	ReMap ChIP-seq,0.1852	ARRDC4,MESP1,MLPH,CREB3L4,PEX11A,GREB1,OPLAH
gene_set_query	614	GTF2IRD2	0.1861	GTEx Coexpression,0.1861	KLF9,ZNF502,ZNF577,ARHGAP6
gene_set_query	615	ZNF302	0.1861	ARCHS4 Coexpression,0.1861	ARHGEF26,NEDD4L,BMPR1B,ZSCAN18
gene_set_query	616	MAFK	0.1864	ENCODE ChIP-seq,0.1864	TTR,ANG,IGF1,STEAP1
gene_set_query	617	ZFP30	0.1873	Enrichr Queries,0.1873	ARRDC4,CITED2,GDF15,IRS1,ZBTB16,DHRS3,IGF1R,AKAP12,SOCS2,CCND1,MYC,TCEA3,KLF9,GC
gene_set_query	618	CCDC17	0.1873	ARCHS4 Coexpression,0.1873	SLC22A23,ABHD2,AQP3,MSMB
gene_set_query	619	ZNF496	0.1879	GTEx Coexpression,0.1879	MBOAT2,ZNF577,ARHGAP6,ZNF135
gene_set_query	620	FEZF1	0.1886	GTEx Coexpression,0.1886	DLX1,TMEFF2,GRIN3A,NCAM2
gene_set_query	621	KMT2A	0.1886	ReMap ChIP-seq,0.1886	CITED2,IRS1,AMD1,ENDOD1,PPM1K,HOXA13,IGF1R,HOXA11,HOXA10,SOCS2,HERC3,CREB3L4,MYC,CHPT1,TMED6,SMPDL3A
gene_set_query	622	LCOR	0.1892	GTEx Coexpression,0.1892	GALNT7,KRTCAP3,TP53INP1,SLC17A4
gene_set_query	623	STAT3	0.1892	ARCHS4 Coexpression,0.1892	STEAP4,IL1R1,DOCK8,ERGIC1
gene_set_query	624	RFX2	0.1895	Enrichr Queries,0.1895	NFIX,GDF15,ZBTB16,NEDD4L,IRS2,IQGAP2,CLU,AKAP12,SOCS2,CCND1,MYC,KLF9,PMEPA1,FKBP5
gene_set_query	625	ZNF585B	0.1898	GTEx Coexpression,0.1898	SLC25A27,ZNF502,ZNF135,ZSCAN18
gene_set_query	626	NKX22	0.1898	ARCHS4 Coexpression,0.1898	TTR,GC,ELL2,CLU
gene_set_query	627	ZNF18	0.1902	Enrichr Queries,0.1902	CITED2,ZBTB16,NEDD4L,IRS2,ADRB2,ELL2,DHRS3,IGF1R,SOCS2,MYC,KLF9,PMEPA1,PAG1,FKBP5
gene_set_query	628	ALX4	0.1904	GTEx Coexpression,0.1904	AZGP1,NFIX,IRX3,PI15
gene_set_query	629	SOX21	0.1904	ARCHS4 Coexpression,0.1904	SMO,CTNND2,FBXL7,ZSCAN18
gene_set_query	630	NFIL3	0.1909	Enrichr Queries,0.1909	IL1R1,CITED2,GDF15,ZBTB16,IRS2,ELL2,CLU,DHRS3,AKAP12,SOCS2,CCND1,MYC,KLF9,FKBP5
gene_set_query	631	ZNF454	0.191	GTEx Coexpression,0.191	CYP2U1,ZNF502,ZNF135,FBXL7
gene_set_query	632	ZNF320	0.1916	Enrichr Queries,0.1916	ARRDC4,GDF15,NEDD4L,PPM1K,DHRS3,IGF1R,CCND1,ZNF649,TP53INP1,PMEPA1,ZNF613,ZNF577,PAG1,ZSCAN18
gene_set_query	633	ZNF511	0.1916	ARCHS4 Coexpression,0.1916	GAMT,NUDT8,DCXR,GCAT
gene_set_query	634	BNC1	0.1923	ARCHS4 Coexpression,0.1923	ALDH1A3,IRS1,CWH43,RHOD
gene_set_query	635	TBX1	0.1929	ARCHS4 Coexpression,0.1929	MYBPC1,SMO,DCXR,TCEA3
gene_set_query	636	NR4A2	0.193	Enrichr Queries,0.193	CITED2,GDF15,ZBTB16,IRS2,ADRB2,ELL2,CLU,DHRS3,AKAP12,SOCS2,CCND1,MYC,KLF9,PMEPA1
gene_set_query	637	NKX61	0.1935	ARCHS4 Coexpression,0.1935	TTR,CYP2U1,GC,TMED6
gene_set_query	638	ZNF671	0.1937	Enrichr Queries,0.1937	CITED2,GDF15,IRS2,ADRB2,AKAP12,SOCS2,GHR,MYC,GNG7,TP53INP1,KLF9,PMEPA1,ZNF135,ZSCAN18
gene_set_query	639	OTP	0.1942	GTEx Coexpression,0.1942	DLX1,TMEFF2,DLX2,GRIN3A
gene_set_query	640	NFE2L2	0.1951	Literature ChIP-seq,0.1951	ARRDC4,ABCC4,DLX2,MAOA,CITED2,IRS1,IDH1,SLC30A4,IRS2,IGF1,SLC4A4,CYP39A1,SLC22A23,HERC3,TMEFF2,KLF9,PI15,RHOU,CHPT1,TRPM8
gene_set_query	641	PKNOX1	0.1952	Enrichr Queries,0.1952	NFIX,CITED2,GDF15,ABHD2,NEDD4L,IRS2,IGF1R,AKAP12,SOCS2,CCND1,MYC,KLF9,PMEPA1,FKBP5
gene_set_query	642	CLOCK	0.1953	ReMap ChIP-seq,0.1953	GRTP1,GDF15,DCXR,GREB1,AQP3,HOXA13,KLF15,FGFRL1,HOXA11,HOXA10,ALDH6A1,NUDT8,PLEKHH1,PDE9A,PLA1A,TRPM4
gene_set_query	643	OSR1	0.1953	ARCHS4 Coexpression,0.1953	ITGB5,IL1R1,RECK
gene_set_query	644	ZNF727	0.1954	GTEx Coexpression,0.1954	SLC25A27,ZNF502,ZNF135,ZSCAN18
gene_set_query	645	ZNF606	0.196	GTEx Coexpression,0.196	SLC25A27,ZNF577,PLEKHH1,ZNF135
gene_set_query	646	ZBTB14	0.1966	ARCHS4 Coexpression,0.1966	EGF,DOCK8,ARHGAP6
gene_set_query	647	NR2C1	0.1966	Enrichr Queries,0.1966	NFIX,CITED2,GDF15,IRS1,NEDD4L,IRS2,IGF1R,AKAP12,SOCS2,SLC25A37,CCND1,MYC,KLF9,CHPT1
gene_set_query	648	ZNF345	0.1966	GTEx Coexpression,0.1966	H2AFJ,CTNND2,ATP6V0E2,ZNF577
gene_set_query	649	BCL6B	0.1972	ARCHS4 Coexpression,0.1972	LATS2,BMX,FBXL7
gene_set_query	650	HOMEZ	0.1973	Enrichr Queries,0.1973	CITED2,GDF15,CLU,KLF15,DHRS3,AKAP12,SOCS2,BDH1,CCND1,MYC,FASN,KLF9,GC,FKBP5
gene_set_query	651	FLYWCH1	0.1979	GTEx Coexpression,0.1979	NPDC1,SLC25A27,NFIX,NME3
gene_set_query	652	KLF3	0.198	Enrichr Queries,0.198	CITED2,ABHD2,NEDD4L,IRS2,ELL2,DHRS3,IGF1R,AKAP12,CCND1,MYC,KLF9,PDLIM5,PAG1,FKBP5
gene_set_query	653	NFIX	0.1984	ARCHS4 Coexpression,0.1984	FOLH1,FGFRL1,ERGIC1
gene_set_query	654	ZNF800	0.1985	GTEx Coexpression,0.1985	MYC,CTNND2,ATP6V0E2,ZSCAN18
gene_set_query	655	KCNIP3	0.199	ARCHS4 Coexpression,0.199	NFIX,CTNND2,ATP6V0E2
gene_set_query	656	ZNF334	0.1991	GTEx Coexpression,0.1991	NPDC1,SLC25A27,ZNF135,ZSCAN18
gene_set_query	657	ASCL2	0.1994	Enrichr Queries,0.1994	NFIX,HPGD,CITED2,GDF15,ZBTB16,IRX3,GATA2,AQP3,TBX3,SOCS2,CCND1,MYC,TCEA3,GC
gene_set_query	658	FAM200B	0.2004	GTEx Coexpression,0.2004	TMEFF2,CTNND2,NCAM2,ATP6V0E2
gene_set_query	659	ZNF772	0.2009	Enrichr Queries,0.2009	ARRDC4,THRB,GDF15,NEDD4L,IGF1R,AKAP12,CCND1,MYC,ZNF649,TP53INP1,ZNF229,ZNF577,ZNF135,ZSCAN18
gene_set_query	660	TBP	0.2009	ARCHS4 Coexpression,0.2009	NFIX,ITGB5,ERGIC1
gene_set_query	661	GABPA	0.2012	Literature ChIP-seq,0.2012	ARRDC4,ABCC4,DLX2,MAOA,CITED2,IRS1,IDH1,SLC30A4,IRS2,IGF1,SLC4A4,CYP39A1,SLC22A23,HERC3,TMEFF2,KLF9,PI15,RHOU,CHPT1,TRPM8
gene_set_query	662	ZNF229	0.2015	ARCHS4 Coexpression,0.2015	DLX2,DOCK8,FAM110B
gene_set_query	663	DACH2	0.2016	GTEx Coexpression,0.2016	PPP3CA,CGREF1,NETO1,NCAM2
gene_set_query	664	FOXP1	0.202	ReMap ChIP-seq,0.202	FOXA1,DLX1,DLX2,CITED2,IDH1,IRS2,ELL2,HOXA13,SH3RF1,TBX3,HOXA11,HOXA10,CREB3L4,MYC,BEND4,ACPP
gene_set_query	665	ZNF853	0.2021	ARCHS4 Coexpression,0.2021	NFIX,CTNND2,ATP6V0E2
gene_set_query	666	IKZF2	0.2023	Enrichr Queries,0.2023	HPGD,IL1R1,CITED2,IRS1,ZBTB16,IRS2,IQGAP2,DHRS3,IGF1R,SOCS2,MYC,PMEPA1,PAG1,FKBP5
gene_set_query	667	ZNF260	0.2027	ARCHS4 Coexpression,0.2027	DLX1,DLX2,TRIM36
gene_set_query	668	ZNF251	0.2029	GTEx Coexpression,0.2029	NPDC1,SLC25A27,ZNF577,ZNF135
gene_set_query	669	ZNF341	0.203	Enrichr Queries,0.203	GDF15,IRS1,ABHD2,ZBTB16,NEDD4L,IRS2,IQGAP2,IGF1R,CCND1,MYC,FASN,TP53INP1,PMEPA1,FKBP5
gene_set_query	670	MYOD1	0.2034	ENCODE ChIP-seq,0.2034	ARHGEF37,GDF15,ABHD2,ENDOD1,IGF1,RHOD,PRLR,DHRS3,MYC,FASN,ATP6V0E2,RAMP1,SLC17A4
gene_set_query	671	MEF2D	0.2047	GTEx Coexpression,0.2047	HOXA10,MYBPC1,ZBTB16,PDLIM5
gene_set_query	672	TLX1	0.2058	Enrichr Queries,0.2058	FOXA1,DLX1,DLX2,NFIX,ZBTB16,IRX3,GATA2,HOXB13,HOXA13,TBX3,HOXA11,HOXA10,MYC
gene_set_query	673	PHOX2B	0.206	GTEx Coexpression,0.206	ARRDC4,ARHGEF26,RAMP1,PDE9A
gene_set_query	674	ZNF587B	0.2064	ARCHS4 Coexpression,0.2064	IDH1,ZNF649,AMD1
gene_set_query	675	EN1	0.2066	Enrichr Queries,0.2066	FOXA1,DLX1,DLX2,MME,ZBTB16,IRX3,IGF1,GATA2,TBX3,HOXA10,ALDH1A3,TMEFF2,MYC
gene_set_query	676	MEF2A	0.2066	GTEx Coexpression,0.2066	ITGB5,ZBTB16,ZNF649,PDLIM5
gene_set_query	677	SKIL	0.2076	ARCHS4 Coexpression,0.2076	IDH1,ZNF649,GULP1
gene_set_query	678	GCM1	0.2087	Enrichr Queries,0.2087	FOXA1,THRB,MME,HPGD,GDF15,ZBTB16,IRS2,IGF1,GATA2,TBX3,CCND1,MYC,SPDEF
gene_set_query	679	MBD2	0.2088	ReMap ChIP-seq,0.2088	GAMT,NPDC1,COLEC12,NFIX,IRX3,NME3,IRS2,OPLAH,HOXA13,FGFRL1,HOXA11,HOXA10,TMEFF2,CCND1,FASN
gene_set_query	680	ZNF641	0.2094	Enrichr Queries,0.2094	ARRDC4,NFIX,CITED2,GDF15,IRS2,IQGAP2,ELL2,DHRS3,IGF1R,TP53INP1,KLF9,PDLIM5,FKBP5
gene_set_query	681	NKX23	0.2095	ARCHS4 Coexpression,0.2095	HOXA10,GATA2,IQGAP2
gene_set_query	682	ASH1L	0.2097	GTEx Coexpression,0.2097	NFIX,ZNF649,KLF9,ZNF502
gene_set_query	683	ZSCAN9	0.2101	ARCHS4 Coexpression,0.2101	DLX1,DLX2,TRIM36
gene_set_query	684	ELF2	0.2103	GTEx Coexpression,0.2103	GLUD1,CGREF1,CTNND2,ATP6V0E2
gene_set_query	685	SMAD5	0.2107	ARCHS4 Coexpression,0.2107	SOCS2,DOCK8,ACACA
gene_set_query	686	ZNF385D	0.211	GTEx Coexpression,0.211	THRB,ANKH,ITGB5,PMEPA1
gene_set_query	687	ATF4	0.2121	ReMap ChIP-seq,0.2121	ABCC4,SPINK1,THRB,HGD,GDF15,GREB1,SLC43A1,GCAT,DHRS3,CLGN,C5,MLPH,TP53INP1,STEAP2,ERGIC1
gene_set_query	688	ZNF138	0.2125	ARCHS4 Coexpression,0.2125	IDH1,TRIM36,ERGIC1
gene_set_query	689	PLAG1	0.213	Enrichr Queries,0.213	MME,CITED2,ZBTB16,IRS2,DHRS3,IGF1R,SOCS2,CCND1,MYC,TP53INP1,KLF9,PMEPA1,PAG1
gene_set_query	690	MAX	0.2131	ARCHS4 Coexpression,0.2131	EGF,ENDOD1,ARHGAP6
gene_set_query	691	EOMES	0.2134	Literature ChIP-seq,0.2134	FOXA1,ABCC4,USP54,IRX3,MBOAT2,ACADSB,RHOD,TBX3,HOXA11,AKAP12,HOXA10,ALDH1A3,CUX2,NETO1,TCEA3,PDLIM5,PLEKHH1,PAG1,ERGIC1
gene_set_query	692	ZNF540	0.2134	GTEx Coexpression,0.2134	NPDC1,SLC25A27,ATP6V0E2,ZSCAN18
gene_set_query	693	PAX6	0.2137	Enrichr Queries,0.2137	FOXA1,DLX1,DLX2,NFIX,CITED2,ZBTB16,CLU,TBX3,IGF1R,SOCS2,CCND1,MYC,BMPR1B
gene_set_query	694	ZSCAN18	0.2138	ARCHS4 Coexpression,0.2138	NPDC1,CTNND2,ATP6V0E2
gene_set_query	695	ZNF804B	0.2147	GTEx Coexpression,0.2147	CSGALNACT1,CROT,PLEKHH1,FGFRL1
gene_set_query	696	ZSCAN16	0.215	ARCHS4 Coexpression,0.215	DLX1,ITGB5,TRIM36
gene_set_query	697	ZNF608	0.2151	Enrichr Queries,0.2151	ARRDC4,CITED2,GDF15,IRS1,NEDD4L,IRS2,DHRS3,IGF1R,AKAP12,CCND1,TP53INP1,KLF9,PAG1
gene_set_query	698	ZBTB4	0.2159	GTEx Coexpression,0.2159	SLC25A27,ZNF135,FBXL7,ZSCAN18
gene_set_query	699	ZNF25	0.2165	Enrichr Queries,0.2165	COLEC12,NFIX,CITED2,GDF15,IRS1,ZBTB16,DHRS3,AKAP12,SOCS2,GHR,MYC,KLF9,RECK
gene_set_query	700	ZNF248	0.2166	GTEx Coexpression,0.2166	NPDC1,SLC25A27,ZNF135,ZSCAN18
gene_set_query	701	CDC5L	0.2168	ARCHS4 Coexpression,0.2168	NEDD4L,HOXB13,NKX3-1
gene_set_query	702	AKAP8	0.2172	GTEx Coexpression,0.2172	TMEFF2,CTNND2,NCAM2,ATP6V0E2
gene_set_query	703	ZNF627	0.2174	ARCHS4 Coexpression,0.2174	FAM110B,TRIM36,ERGIC1
gene_set_query	704	PAX2	0.2178	GTEx Coexpression,0.2178	GLYATL1,GDF15,CRYL1,GGT1
gene_set_query	705	ZNF367	0.2181	ARCHS4 Coexpression,0.2181	EGF,ENDOD1,ARHGAP6
gene_set_query	706	L3MBTL1	0.2184	GTEx Coexpression,0.2184	NPDC1,SLC25A27,ZNF135,ZSCAN18
gene_set_query	707	ZNF93	0.2187	ARCHS4 Coexpression,0.2187	IDH1,ZNF649,GULP1
gene_set_query	708	ZNF35	0.2193	ARCHS4 Coexpression,0.2193	IDH1,ZNF229,GULP1
gene_set_query	709	HES1	0.2194	Enrichr Queries,0.2194	ITGB5,CITED2,GDF15,IRS1,IRS2,CLU,DHRS3,AKAP12,SOCS2,CCND1,MYC,KLF9,PMEPA1
gene_set_query	710	ZBED2	0.2197	GTEx Coexpression,0.2197	CSGALNACT1,CROT,PLEKHH1,FGFRL1
gene_set_query	711	ARHGAP35	0.2199	ARCHS4 Coexpression,0.2199	NFIX,IRS1,ACACA
gene_set_query	712	NR6A1	0.2201	Enrichr Queries,0.2201	THRB,CITED2,GDF15,NEDD4L,IRS2,DHRS3,IGF1R,AKAP12,CCND1,MYC,KLF9,BEND4,FKBP5
gene_set_query	713	KLF6	0.2203	GTEx Coexpression,0.2203	MYC,KLF9,ADRB2,ATP6V0E2
gene_set_query	714	BHLHE40	0.2203	ENCODE ChIP-seq,0.2203	MCCC2,GAMT,SLC22A3,DLX1,ABCC4,NFIX,IL1R1,CITED2,ABHD2,SLC43A1,ENDOD1,NME3,GCAT,IGF1R,SLC22A23,SOCS2,SLC25A37,DHRS7,LATS2,CYP2U1,RAMP1,ERGIC1,SLC17A4
gene_set_query	715	TEAD3	0.2205	ARCHS4 Coexpression,0.2205	ITGB5,IRS1,TBX3
gene_set_query	716	BARX1	0.2211	ARCHS4 Coexpression,0.2211	IRX3,OPLAH,HOXA11
gene_set_query	717	FOXF2	0.2215	Enrichr Queries,0.2215	FOXA1,COLEC12,DLX2,GDF15,IRX3,GATA2,TBX3,AKAP12,SOCS2,ALDH1A3,CCND1,MYC,PMEPA1
gene_set_query	718	TAL2	0.2215	GTEx Coexpression,0.2215	GAMT,MYBPC1,PEBP4,TCEA3
gene_set_query	719	MYOG	0.2222	GTEx Coexpression,0.2222	GAMT,MYBPC1,DHRS7,TCEA3
gene_set_query	720	ZNF699	0.2222	Enrichr Queries,0.2222	ARRDC4,GDF15,NEDD4L,IRS2,ELL2,AKAP12,SLC25A37,CCND1,TP53INP1,KLF9,RHOU,PDLIM5,PAG1
gene_set_query	721	HMBOX1	0.2222	ReMap ChIP-seq,0.2222	GALNT7,IL1R1,CITED2,ABHD2,DOCK8,MBOAT2,ACSL3,IQGAP2,ELL2,DHRS3,GULP1,SLC22A23,SLC25A37,CHPT1,MSMB
gene_set_query	722	TGIF1	0.2224	ARCHS4 Coexpression,0.2224	NFIX,IDH1,GULP1
gene_set_query	723	OVOL2	0.2234	GTEx Coexpression,0.2234	SLC22A23,KRTCAP3,IRX3,CWH43
gene_set_query	724	SOX7	0.2236	ARCHS4 Coexpression,0.2236	COLEC12,CYP4F8,BMX
gene_set_query	725	OVOL3	0.2248	ARCHS4 Coexpression,0.2248	ARHGEF37,RAMP1,GNMT
gene_set_query	726	HOXB2	0.2251	Enrichr Queries,0.2251	COLEC12,CITED2,GDF15,ZBTB16,IRX3,GATA2,DHRS3,TBX3,HOXA10,SOCS2,ALDH1A3,CCND1,MYC
gene_set_query	727	FOXJ2	0.2253	GTEx Coexpression,0.2253	CTNND2,ZBTB16,ZNF649,NCAM2
gene_set_query	728	ZNF665	0.2258	Enrichr Queries,0.2258	CITED2,GDF15,IRS1,IRS2,ADRB2,AKAP12,SOCS2,CCND1,MYC,TP53INP1,ZNF135,ZSCAN18,FKBP5
gene_set_query	729	ZNF391	0.2265	Enrichr Queries,0.2265	ARRDC4,THRB,HPGD,GDF15,IRS1,IGF1R,CLGN,AKAP12,SOCS2,CYP2U1,MYC,TRIM36,STEAP2
gene_set_query	730	ZNF19	0.2272	Enrichr Queries,0.2272	ARRDC4,CITED2,GDF15,NEDD4L,ADRB2,IQGAP2,DHRS3,SOCS2,TP53INP1,KLF9,ZNF229,GC,ZNF135
gene_set_query	731	ZNF92	0.2273	ARCHS4 Coexpression,0.2273	IDH1,AMD1,ZNF577
gene_set_query	732	KLF14	0.2279	Enrichr Queries,0.2279	PTGFR,DLX1,DLX2,NFIX,ZBTB16,IRX3,IGF1,HOXA13,TBX3,HOXA10,CUX2,MYC,PRR16
gene_set_query	733	ZEB2	0.229	ReMap ChIP-seq,0.229	THRB,ARHGEF37,GDF15,ABHD2,SLC2A12,NEDD4L,MBOAT2,ACSL3,SLC25A37,MYC,KLF9,ANG,TRPM4,SPDEF,FKBP5
gene_set_query	734	NFATC2	0.2293	Enrichr Queries,0.2293	NFIX,CITED2,ZBTB16,NEDD4L,IRS2,IQGAP2,DHRS3,IGF1R,CCND1,MYC,KLF9,PMEPA1,PAG1
gene_set_query	735	FOXN3	0.2296	GTEx Coexpression,0.2296	NFIX,LATS2,ZBTB16,ZNF649
gene_set_query	736	ZSCAN21	0.2297	ARCHS4 Coexpression,0.2297	IDH1,ZNF229,ERGIC1
gene_set_query	737	OTX1	0.2302	GTEx Coexpression,0.2302	GLYATL2,ZG16B,IRX3,CWH43
gene_set_query	738	RORA	0.2308	Enrichr Queries,0.2308	NFIX,THRB,MME,CITED2,ZBTB16,NEDD4L,IRS2,IGF1R,AKAP12,CCND1,MYC,KLF9,PMEPA1
gene_set_query	739	TCF15	0.2309	GTEx Coexpression,0.2309	NUDT8,PEBP4,PDLIM5
gene_set_query	740	NACC2	0.2321	GTEx Coexpression,0.2321	GLUD1,CTNND2,NCAM2
gene_set_query	741	KCMF1	0.2327	GTEx Coexpression,0.2327	MYBPC1,DHRS7,EGF
gene_set_query	742	RARA	0.2329	Enrichr Queries,0.2329	NFIX,CITED2,GDF15,IRS1,IRS2,DHRS3,IGF1R,SOCS2,CCND1,MYC,FASN,KLF9,PMEPA1
gene_set_query	743	MXD1	0.2334	ARCHS4 Coexpression,0.2334	SLC25A37,STEAP4,DOCK8
gene_set_query	744	TFDP2	0.2336	Enrichr Queries,0.2336	NFIX,CITED2,ZBTB16,NEDD4L,IRS2,DHRS3,IGF1R,AKAP12,SOCS2,CCND1,MYC,KLF9,FKBP5
gene_set_query	745	ZBTB12	0.234	GTEx Coexpression,0.234	MME,CITED2,IRS1
gene_set_query	746	WIZ	0.234	ARCHS4 Coexpression,0.234	NFIX,FASN,FGFRL1
gene_set_query	747	HLX	0.235	Enrichr Queries,0.235	COLEC12,IL1R1,CITED2,GDF15,IRS2,ADRB2,DHRS3,TBX3,AKAP12,SOCS2,CCND1,MYC,PMEPA1
gene_set_query	748	ZNF607	0.2358	Enrichr Queries,0.2358	GDF15,NEDD4L,IRS2,IGF1R,AKAP12,MYC,ZNF649,ZNF229,ZNF613,ZNF502,ZNF577,ZNF135,ZSCAN18
gene_set_query	749	ZNF268	0.2358	GTEx Coexpression,0.2358	CITED2,IRS1,ZNF502
gene_set_query	750	ETV5	0.2365	Enrichr Queries,0.2365	ITGB5,CITED2,GDF15,IRS2,DHRS3,AKAP12,SOCS2,CCND1,MYC,FASN,KLF9,PMEPA1,FKBP5
gene_set_query	751	NFXL1	0.2365	ARCHS4 Coexpression,0.2365	NFIX,CYP2U1,ERGIC1
gene_set_query	752	ZNF784	0.2371	ARCHS4 Coexpression,0.2371	MYBPC1,SMO,TCEA3
gene_set_query	753	NFYB	0.2373	ENCODE ChIP-seq,0.2373	DLX1,ABHD2,AMD1,IRS2,CROT,ADRB2,HOXB13,SLC25A27,HERC3,H2AFJ,TP53TG1,TP53INP1,NKX3-1,SLC2A12,ACSL3,ELL2,KLF15,GCAT,TBX3,CYP39A1,SLC25A37,ALDH6A1,CYP2U1,ERGIC1
gene_set_query	754	ZNF33A	0.2377	GTEx Coexpression,0.2377	GALNT7,KRTCAP3,HOMER2
gene_set_query	755	BCL11A	0.2377	ARCHS4 Coexpression,0.2377	SOCS2,FAM110B,TRIM36
gene_set_query	756	ATMIN	0.2383	ARCHS4 Coexpression,0.2383	FOXA1,IRS1,ACACA
gene_set_query	757	RXRB	0.2383	GTEx Coexpression,0.2383	SLC25A27,NME3,ZNF135
gene_set_query	758	USF2	0.239	GTEx Coexpression,0.239	LATS2,CTNND2,ATP6V0E2
gene_set_query	759	ZNF219	0.24	Enrichr Queries,0.24	NPDC1,CITED2,GDF15,NEDD4L,NME3,IRS2,DHRS3,SOCS2,CCND1,MYC,FASN,TP53INP1,GC
gene_set_query	760	MYT1	0.2408	ARCHS4 Coexpression,0.2408	CTNND2,ATP6V0E2,ZSCAN18
gene_set_query	761	HMGN3	0.2408	GTEx Coexpression,0.2408	NME3,PPM1K,ZSCAN18
gene_set_query	762	TET1	0.2414	ARCHS4 Coexpression,0.2414	IDH1,ZNF649,GULP1
gene_set_query	763	SOX3	0.2414	GTEx Coexpression,0.2414	CTNND2,NCAM2,ATP6V0E2
gene_set_query	764	FOSB	0.242	ARCHS4 Coexpression,0.242	DOCK8,KLF9,IRS2
gene_set_query	765	MYRF	0.2421	GTEx Coexpression,0.2421	PSCA,RHOU,PGC
gene_set_query	766	EGR3	0.2422	Enrichr Queries,0.2422	CITED2,GDF15,ZBTB16,IRS2,ADRB2,CLU,AKAP12,SOCS2,ALDH1A3,CCND1,MYC,KLF9,PMEPA1
gene_set_query	767	CUX1	0.2424	ReMap ChIP-seq,0.2424	GAMT,CGREF1,DLX1,DLX2,GDF15,DCXR,GREB1,CLU,GCAT,DHRS3,NUDT8,CCND1,MYC,FASN,ANG
gene_set_query	768	SP6	0.2426	ARCHS4 Coexpression,0.2426	RHOU,GATA2,TBX3
gene_set_query	769	NOTO	0.2427	GTEx Coexpression,0.2427	GALNT7,PGC,PDE9A
gene_set_query	770	ZNF676	0.2433	GTEx Coexpression,0.2433	ZNF577,ARHGAP6,ZNF135
gene_set_query	771	ZNF664	0.2439	ARCHS4 Coexpression,0.2439	FOXA1,ERGIC1,ACACA
gene_set_query	772	PHOX2A	0.2439	GTEx Coexpression,0.2439	IDH1,RAMP1,TBX3
gene_set_query	773	ZNF652	0.2443	Enrichr Queries,0.2443	HOMER2,ABHD2,NEDD4L,MBOAT2,IRS2,IGF1R,SOCS2,CCND1,MYC,TP53INP1,KLF9,PDLIM5,FKBP5
gene_set_query	774	FOXI2	0.2445	ARCHS4 Coexpression,0.2445	CHRNA2,HOXB13,PLA2G7
gene_set_query	775	ZNF605	0.245	Enrichr Queries,0.245	ARRDC4,GDF15,NEDD4L,IQGAP2,ACADSB,IGF1R,SOCS2,PPP3CA,CCND1,TP53INP1,PMEPA1,STEAP2,FKBP5
gene_set_query	776	ZNF780B	0.2452	GTEx Coexpression,0.2452	SLC25A27,ZNF135,ZSCAN18
gene_set_query	777	ATF1	0.2469	ARCHS4 Coexpression,0.2469	MESP1,CTNND2,ZSCAN18
gene_set_query	778	ZNF280A	0.247	GTEx Coexpression,0.247	IDH1,PRLR,TBX3
gene_set_query	779	DPF1	0.2475	ARCHS4 Coexpression,0.2475	CTNND2,ATP6V0E2,ZSCAN18
gene_set_query	780	ZNF630	0.2477	GTEx Coexpression,0.2477	NME3,ZNF135,IGF1R
gene_set_query	781	SOX5	0.2482	ARCHS4 Coexpression,0.2482	CTNND2,FAM110B,TRIM36
gene_set_query	782	VSX2	0.2483	GTEx Coexpression,0.2483	PPP3CA,NETO1,GNG7
gene_set_query	783	ZNF670	0.2488	ARCHS4 Coexpression,0.2488	HGD,IDH1,SLC43A1
gene_set_query	784	E2F4	0.2489	GTEx Coexpression,0.2489	GLUD1,CTNND2,NCAM2
gene_set_query	785	NFE2L1	0.2494	ARCHS4 Coexpression,0.2494	NFIX,ITGB5,ERGIC1
gene_set_query	786	ZNF329	0.25	Enrichr Queries,0.25	ARRDC4,CITED2,GDF15,IRS1,NEDD4L,IRS2,DHRS3,SOCS2,CCND1,MYC,TP53INP1,ZSCAN18,FKBP5
gene_set_query	787	ZNF281	0.25	ARCHS4 Coexpression,0.25	IDH1,AMD1,GULP1
gene_set_query	788	ETV4	0.2506	ARCHS4 Coexpression,0.2506	IDH1,ACSL3,F5
gene_set_query	789	ZBTB2	0.2514	Enrichr Queries,0.2514	CITED2,GDF15,IRS1,NEDD4L,IRS2,AKAP12,SOCS2,CCND1,MYC,FASN,KLF9,PMEPA1,FKBP5
gene_set_query	790	SALL2	0.2518	ARCHS4 Coexpression,0.2518	SMO,IDH1,GULP1
gene_set_query	791	TFAP2D	0.2533	GTEx Coexpression,0.2533	TMEFF2,CTNND2,NCAM2
gene_set_query	792	ZNF239	0.2536	Enrichr Queries,0.2536	CITED2,GDF15,IRS1,NEDD4L,IRS2,ADRB2,AKAP12,SOCS2,CCND1,MYC,PMEPA1,STEAP1,FKBP5
gene_set_query	793	USF1	0.2542	ENCODE ChIP-seq,0.2542	MCCC2,VIPR1,DLX2,SLC43A1,IRS2,KLF15,HOXA11,SOCS2,ALDH1A3,ALDH6A1,LATS2,MLPH,CREB3L4,TP53INP1,ATP6V0E2,FKBP5,NKX3-1
gene_set_query	794	ZNF425	0.2543	Enrichr Queries,0.2543	ARRDC4,CITED2,GDF15,IRS1,NEDD4L,IRS2,ELL2,DHRS3,AKAP12,CCND1,MYC,TP53INP1,KLF9
gene_set_query	795	POU4F2	0.2543	ARCHS4 Coexpression,0.2543	TMEFF2,CUX2,CTNND2
gene_set_query	796	RFX4	0.2555	ARCHS4 Coexpression,0.2555	ALDH6A1,CTNND2,CLU
gene_set_query	797	ZNF518B	0.2557	Enrichr Queries,0.2557	ARRDC4,ABCC4,CITED2,GDF15,IRS1,IRS2,AKAP12,SOCS2,MYC,FASN,TP53INP1,RHOU,PAG1
gene_set_query	798	MTERF4	0.2558	GTEx Coexpression,0.2558	SLC25A27,PLEKHH1,ZNF135
gene_set_query	799	MYC	0.2561	Literature ChIP-seq,0.2561	COLEC12,NFIX,THRB,CTNND2,DOCK8,KLK4,IRS2,KLK2,RPS4Y1,ARHGAP6,C5,ACADL,CCND1,ZNF502,NCAM2,PAG1,GALNT7,UGT2B11,SLC30A4,CYP39A1,TMEFF2,FOLH1,AGTR1,STEAP1,PDE9A
gene_set_query	800	ZNF512B	0.2564	GTEx Coexpression,0.2564	SLC25A27,SMO,ZNF135
gene_set_query	801	KLF12	0.257	GTEx Coexpression,0.257	SLC22A23,THRB,CYP2U1
gene_set_query	802	RREB1	0.2571	Enrichr Queries,0.2571	NFIX,CITED2,IRS1,ABHD2,NEDD4L,IRS2,IQGAP2,IGF1R,CCND1,MYC,KLF9,PDLIM5,FKBP5
gene_set_query	803	TBX22	0.2574	ARCHS4 Coexpression,0.2574	ANKRD30B,IDH1,POTEE
gene_set_query	804	ZNF626	0.2576	GTEx Coexpression,0.2576	IRS1,ZNF135,ZSCAN18
gene_set_query	805	ZFP90	0.2578	Enrichr Queries,0.2578	ARRDC4,CITED2,GDF15,IRS1,NEDD4L,DHRS3,SOCS2,CCND1,MYC,KLF9,PMEPA1,RHOU,GC
gene_set_query	806	LIN28B	0.258	ARCHS4 Coexpression,0.258	SMO,IDH1,GULP1
gene_set_query	807	ZBED1	0.2589	GTEx Coexpression,0.2589	MYBPC1,DHRS7,TCEA3
gene_set_query	808	HES7	0.2592	ARCHS4 Coexpression,0.2592	SCUBE2,HOXB13,KLF15
gene_set_query	809	SREBF2	0.26	Enrichr Queries,0.26	NFIX,CITED2,GDF15,IDH1,NEDD4L,IRS2,ACSL3,CLU,ACACA,IGF1R,CCND1,MYC,FASN
gene_set_query	810	LHX9	0.2601	GTEx Coexpression,0.2601	GREB1,ZNF577,FBXL7
gene_set_query	811	ZNF589	0.2604	ARCHS4 Coexpression,0.2604	ZNF649,BEND4,GULP1
gene_set_query	812	ZNF701	0.2607	Enrichr Queries,0.2607	ARRDC4,GDF15,IRS2,IGF1R,SOCS2,CCND1,MYC,ZNF649,TP53INP1,PMEPA1,ZNF613,ZNF577,PAG1
gene_set_query	813	HES5	0.2607	GTEx Coexpression,0.2607	GLUD1,CTNND2,ATP6V0E2
gene_set_query	814	DZIP1	0.2611	ARCHS4 Coexpression,0.2611	SMO,CTNND2,DOCK8
gene_set_query	815	DMTF1	0.2614	GTEx Coexpression,0.2614	SLC25A27,ZNF577,ZNF135
gene_set_query	816	ZBTB34	0.2614	Enrichr Queries,0.2614	NFIX,HOMER2,CITED2,ABHD2,NEDD4L,IRS2,IGF1R,AKAP12,SOCS2,TP53INP1,KLF9,PMEPA1,PAG1
gene_set_query	817	ZNF793	0.2621	Enrichr Queries,0.2621	GDF15,IRS2,AKAP12,SOCS2,GHR,TP53INP1,ZNF502,NCAM2,ZNF577,STEAP2,PAG1,ZNF135,ZSCAN18
gene_set_query	818	HES3	0.2623	ARCHS4 Coexpression,0.2623	SMO,BEND4,GULP1
gene_set_query	819	E2F6	0.2627	ENCODE ChIP-seq,0.2627	MCCC2,NPDC1,ABCC4,STEAP4,DOCK8,DCXR,CROT,ADRB2,GCAT,CLGN,KRTCAP3,HERC3,MLPH,CYP2U1,MYC,FAM110B,PRR16,ZNF229,CRYL1,ZNF385B,ANG,ZNF502,ZNF577
gene_set_query	820	ZNF2	0.2628	Enrichr Queries,0.2628	ARRDC4,CITED2,GDF15,IRS1,NEDD4L,ADRB2,DHRS3,SOCS2,CCND1,KLF9,PMEPA1,RHOU,FKBP5
gene_set_query	821	CREB5	0.2629	ARCHS4 Coexpression,0.2629	SLC25A37,STEAP4,DOCK8
gene_set_query	822	ZZZ3	0.2632	GTEx Coexpression,0.2632	CITED2,IRS1,ZNF649
gene_set_query	823	ZNF691	0.2635	Enrichr Queries,0.2635	CITED2,GDF15,ZBTB16,NEDD4L,IRS2,ADRB2,DHRS3,BDH1,CCND1,MYC,PMEPA1,RHOU,GC
gene_set_query	824	ZBTB39	0.2642	Enrichr Queries,0.2642	HOMER2,CITED2,GDF15,IRS1,ZBTB16,IRS2,IGF1R,SOCS2,CCND1,MYC,FASN,KLF9,FKBP5
gene_set_query	825	PRDM9	0.265	Enrichr Queries,0.265	THRB,MME,CITED2,GDF15,IRS1,CTNND2,NEDD4L,IRS2,IGF1,DHRS3,CCND1,MYC,KLF9
gene_set_query	826	AEBP2	0.2651	GTEx Coexpression,0.2651	ITGB5,ZNF649,GULP1
gene_set_query	827	HAND2	0.2654	ARCHS4 Coexpression,0.2654	CCND1,GATA2,TBX3
gene_set_query	828	ZNF280B	0.2657	Enrichr Queries,0.2657	ARRDC4,CITED2,GDF15,IRS1,NEDD4L,IRS2,CLU,IGF1R,AKAP12,SOCS2,CCND1,MYC,TP53INP1
gene_set_query	829	REPIN1	0.2657	GTEx Coexpression,0.2657	MCCC2,GAMT,TCEA3
gene_set_query	830	ZNF274	0.2663	GTEx Coexpression,0.2663	CTNND2,NCAM2,ZNF577
gene_set_query	831	ZNF790	0.2664	Enrichr Queries,0.2664	CITED2,IRS1,AMD1,CLU,DHRS3,AKAP12,SOCS2,MYC,TP53INP1,ZNF229,ZNF613,ZNF577,ZSCAN18
gene_set_query	832	TERF1	0.2666	ARCHS4 Coexpression,0.2666	IDH1,ZNF649,GULP1
gene_set_query	833	CPEB1	0.2672	ARCHS4 Coexpression,0.2672	ARHGEF26,NEDD4L,PPM1K
gene_set_query	834	ZNF22	0.2676	GTEx Coexpression,0.2676	SLC43A1,AGTR1,CWH43
gene_set_query	835	SOX18	0.2682	GTEx Coexpression,0.2682	ANKRD29,STEAP4,GATA2
gene_set_query	836	ETV6	0.2684	ARCHS4 Coexpression,0.2684	SOCS2,DOCK8,IQGAP2
gene_set_query	837	GZF1	0.2685	Enrichr Queries,0.2685	ARRDC4,CITED2,GDF15,IRS1,IRS2,ELL2,DHRS3,SOCS2,CCND1,MYC,KLF9,PMEPA1,FKBP5
gene_set_query	838	ZNF365	0.2688	GTEx Coexpression,0.2688	NETO1,CTNND2,NCAM2
gene_set_query	839	ADNP	0.2694	ReMap ChIP-seq,0.2694	GAMT,GDF15,HPN,ENDOD1,KLK4,RHOD,CLU,DHRS3,NUDT8,GNG7,ANG,NCAM2,TRPM4,SPDEF
gene_set_query	840	ZFP41	0.2699	Enrichr Queries,0.2699	ARRDC4,NFIX,GDF15,IRS2,IGF1R,SOCS2,CCND1,MYC,FASN,PMEPA1,RHOU,GC,FKBP5
gene_set_query	841	ZBTB21	0.2701	GTEx Coexpression,0.2701	LATS2,MYC,ELL2
gene_set_query	842	PRDM13	0.2715	ARCHS4 Coexpression,0.2715	SMO,DCXR,HOXA11
gene_set_query	843	HMX3	0.2721	Enrichr Queries,0.2721	FOXA1,DLX1,DLX2,GDF15,ZBTB16,IRX3,GATA2,HOXB13,HOXA13,TBX3,HOXA10,MYC
gene_set_query	844	HMX2	0.2728	Enrichr Queries,0.2728	FOXA1,DLX1,DLX2,GDF15,ZBTB16,IRX3,GATA2,HOXB13,HOXA13,TBX3,HOXA10,CUX2
gene_set_query	845	FOXD4L3	0.2735	Enrichr Queries,0.2735	FOXA1,SPON2,DLX1,DLX2,GDF15,IRX3,GATA2,HOXB13,TBX3,ALDH1A3,CUX2,MYC
gene_set_query	846	ZNF529	0.2738	GTEx Coexpression,0.2738	SLC25A27,ZNF135,ZSCAN18
gene_set_query	847	TLX3	0.2742	Enrichr Queries,0.2742	FOXA1,DLX1,DLX2,NFIX,IRX3,GATA2,HOXB13,HOXA13,TBX3,HOXA11,HOXA10,CUX2
gene_set_query	848	NCOA1	0.2744	GTEx Coexpression,0.2744	PPP3CA,CTNND2,NCAM2
gene_set_query	849	ZNF771	0.275	GTEx Coexpression,0.275	CGREF1,CTNND2,ATP6V0E2
gene_set_query	850	PLAGL1	0.2752	ARCHS4 Coexpression,0.2752	TTR,GC,ELL2
gene_set_query	851	ZNF14	0.2756	Enrichr Queries,0.2756	CITED2,GDF15,IRS2,DHRS3,SOCS2,MYC,FASN,TP53INP1,KLF9,PMEPA1,ZNF577,ZSCAN18
gene_set_query	852	POU4F1	0.2757	GTEx Coexpression,0.2757	MYBPC1,BEND4,PLA1A
gene_set_query	853	OTX2	0.2761	ReMap ChIP-seq,0.2761	GALNT7,THRB,CITED2,SLC2A12,IRS2,PLA2G7,DHRS3,IGF1R,PPP3CA,HERC3,FAM110B,PI15,CNTN3,PDLIM5
gene_set_query	854	FOXD4L6	0.2764	Enrichr Queries,0.2764	FOXA1,SPON2,NFIX,ANKRD30B,CTNND2,DHRS3,TBX3,SLC22A23,GRIN3A,MYC,BEND4,RHOU
gene_set_query	855	ZNF521	0.2764	ARCHS4 Coexpression,0.2764	CTNND2,FBXL7,ZSCAN18
gene_set_query	856	DMBX1	0.2771	Enrichr Queries,0.2771	FOXA1,MESP1,DLX1,DLX2,GDF15,IRX3,GATA2,HOXB13,TBX3,CUX2,CCND1,RHOU
gene_set_query	857	ZFP92	0.2775	GTEx Coexpression,0.2775	ARHGEF37,CWH43,PAG1
gene_set_query	858	ZNF750	0.2776	ARCHS4 Coexpression,0.2776	ARHGEF37,CWH43,AQP3
gene_set_query	859	ZNF597	0.2778	Enrichr Queries,0.2778	ARRDC4,CITED2,GDF15,ZBTB16,IRS2,ADRB2,AKAP12,SOCS2,CCND1,MYC,TP53INP1,KLF9
gene_set_query	860	ZNF524	0.2782	GTEx Coexpression,0.2782	SPINK1,HOMER2,SLC43A1
gene_set_query	861	TFDP3	0.2783	ARCHS4 Coexpression,0.2783	ARHGEF26,POTEE,BEND4
gene_set_query	862	ZHX1	0.2788	GTEx Coexpression,0.2788	GLUD1,MYO6,MBOAT2
gene_set_query	863	MBNL2	0.2789	ARCHS4 Coexpression,0.2789	KLF9,GC,ELL2
gene_set_query	864	CARF	0.2794	GTEx Coexpression,0.2794	SLC25A27,ZNF577,ZNF135
gene_set_query	865	ZNF263	0.2797	ENCODE ChIP-seq,0.2797	SLC22A23,FOXA1,PPP3CA,DHRS7,THRB,CITED2,MYC,DOCK8,KLF9,ATP6V0E2,IGF1R
gene_set_query	866	EBF3	0.2813	GTEx Coexpression,0.2813	GHR,STEAP4,AGTR1
gene_set_query	867	MYF5	0.2819	GTEx Coexpression,0.2819	GAMT,MYBPC1,TCEA3
gene_set_query	868	ZSCAN25	0.2819	ARCHS4 Coexpression,0.2819	ITGB5,DOCK8,PAG1
gene_set_query	869	SNAPC2	0.2825	GTEx Coexpression,0.2825	MCCC2,RAMP1,HOXA11
gene_set_query	870	NKX24	0.2826	ARCHS4 Coexpression,0.2826	HOXA10,HOXA13,HOXA11
gene_set_query	871	TBXT	0.2828	ReMap ChIP-seq,0.2828	MESP1,HPN,SLC43A1,HOXB13,FGFRL1,TBX3,GULP1,SLC25A37,NUDT8,MYC,ZNF649,PMEPA1,SMPDL3A,SPDEF
gene_set_query	872	ZNF544	0.2838	GTEx Coexpression,0.2838	KLF9,KLF15,ZNF135
gene_set_query	873	MSANTD1	0.2844	GTEx Coexpression,0.2844	PPP3CA,CGREF1,GNG7
gene_set_query	874	ZNF571	0.2862	GTEx Coexpression,0.2862	SLC25A27,NME3,ZNF135
gene_set_query	875	ZNF354A	0.2863	Enrichr Queries,0.2863	ARRDC4,CITED2,GDF15,IRS2,AKAP12,SOCS2,CCND1,MYC,FASN,PMEPA1,GC,FKBP5
gene_set_query	876	C11ORF95	0.2869	GTEx Coexpression,0.2869	ZNF135,FBXL7,ZSCAN18
gene_set_query	877	ZNF621	0.2875	GTEx Coexpression,0.2875	MME,CITED2,RECK
gene_set_query	878	MIXL1	0.2877	Enrichr Queries,0.2877	FOXA1,COLEC12,MESP1,DLX1,DLX2,GDF15,IRS1,IRX3,GATA2,TBX3,MYC,TCEA3
gene_set_query	879	DPRX	0.2885	Enrichr Queries,0.2885	FOXA1,DLX1,DLX2,GDF15,GATA2,HOXB13,HOXA13,TBX3,CUX2,MYC,ZNF385B,SPDEF
gene_set_query	880	ZBTB8B	0.2887	GTEx Coexpression,0.2887	CTNND2,NCAM2,ATP6V0E2
gene_set_query	881	MAFG	0.2896	ReMap ChIP-seq,0.2896	GALNT7,ABCC4,IL1R1,CITED2,GDF15,KLK4,NEDD4L,ADRB2,OPLAH,ELL2,CLU,SLC22A23,SLC25A37,CHPT1
gene_set_query	882	ZNF536	0.2905	ARCHS4 Coexpression,0.2905	TMEFF2,CTNND2,TRIM36
gene_set_query	883	ZNF254	0.2906	GTEx Coexpression,0.2906	CSGALNACT1,PLEKHH1,ZNF135
gene_set_query	884	ZNF75D	0.2912	GTEx Coexpression,0.2912	IDH1,ERGIC1,TBX3
gene_set_query	885	CREM	0.2913	Enrichr Queries,0.2913	IL1R1,CITED2,GDF15,IRS2,ELL2,AKAP12,SOCS2,CCND1,MYC,FASN,KLF9,FKBP5
gene_set_query	886	TGIF2LX	0.2918	ARCHS4 Coexpression,0.2918	IL1R1,MYC,KLF15
gene_set_query	887	ZNF559	0.2918	GTEx Coexpression,0.2918	ZNF577,ZNF135,FBXL7
gene_set_query	888	BHLHE41	0.2924	ARCHS4 Coexpression,0.2924	MYBPC1,NFIX,IRS2
gene_set_query	889	ZNF512	0.2925	GTEx Coexpression,0.2925	SLC25A27,ZNF135,ZSCAN18
gene_set_query	890	ZBTB5	0.2934	Enrichr Queries,0.2934	ARRDC4,CITED2,GDF15,IRS1,IRS2,PPM1K,IGF1R,CCND1,MYC,FASN,TP53INP1,KLF9
gene_set_query	891	RUNX3	0.2942	ARCHS4 Coexpression,0.2942	MYC,DOCK8,KLF15
gene_set_query	892	SPEN	0.2943	GTEx Coexpression,0.2943	ZBTB16,KLF9,IGF1R
gene_set_query	893	NKX12	0.2961	ARCHS4 Coexpression,0.2961	IDH1,BEND4,GULP1
gene_set_query	894	HSF1	0.2963	ReMap ChIP-seq,0.2963	GAMT,NPDC1,SPON2,PSCA,DCXR,NME3,CLU,FGFRL1,NUDT8,CREB3L4,FASN,GNG7,HSBP1L1,TRPM4
gene_set_query	895	ZNF32	0.2967	ARCHS4 Coexpression,0.2967	FAM110B,ATP6V0E2,ERGIC1
gene_set_query	896	POU1F1	0.297	Enrichr Queries,0.297	FOXA1,DLX2,THRB,MME,IRS1,ZBTB16,IGF1,GATA2,TBX3,MYC,AGTR1,GC
gene_set_query	897	ZNF442	0.2977	Enrichr Queries,0.2977	ARRDC4,COLEC12,CITED2,GDF15,IRS2,IQGAP2,CLU,AKAP12,SOCS2,MYC,TP53INP1,FKBP5
gene_set_query	898	TLX2	0.2985	ARCHS4 Coexpression,0.2985	CCND1,GATA2,TBX3
gene_set_query	899	TFEC	0.2987	GTEx Coexpression,0.2987	DOCK8,PLA2G7,PAG1
gene_set_query	900	ZNF732	0.2991	ARCHS4 Coexpression,0.2991	IDH1,ZNF649,GULP1
gene_set_query	901	ZNF10	0.2991	Enrichr Queries,0.2991	ARRDC4,CITED2,GDF15,NEDD4L,IRS2,ELL2,SOCS2,MYC,TP53INP1,PMEPA1,TRIM36,ZNF577
gene_set_query	902	ALX3	0.2993	GTEx Coexpression,0.2993	NPDC1,CTNND2,ZSCAN18
gene_set_query	903	NPAS4	0.2998	ARCHS4 Coexpression,0.2998	TTR,GC,ELL2
gene_set_query	904	ZNF688	0.3004	ARCHS4 Coexpression,0.3004	THRB,ARHGEF26,PPM1K
gene_set_query	905	MESP2	0.3006	GTEx Coexpression,0.3006	CGREF1,TMEFF2,NETO1
gene_set_query	906	KLF8	0.3006	Enrichr Queries,0.3006	ARRDC4,MME,HPGD,CITED2,AQP3,CLU,AKAP12,SOCS2,CCND1,MYC,KLF9,PMEPA1
gene_set_query	907	HESX1	0.3016	ARCHS4 Coexpression,0.3016	IDH1,RPS4Y1,GULP1
gene_set_query	908	ZBTB3	0.302	Enrichr Queries,0.302	CITED2,GDF15,IRS1,IRS2,ADRB2,DHRS3,SOCS2,CCND1,MYC,KLF9,PMEPA1,GC
gene_set_query	909	SMAD1	0.3027	Enrichr Queries,0.3027	CITED2,IRS1,IRS2,CLU,IGF1R,AKAP12,SOCS2,CCND1,MYC,KLF9,PMEPA1,FKBP5
gene_set_query	910	BSX	0.3028	ARCHS4 Coexpression,0.3028	KRTCAP3,SPINK1,ACADL
gene_set_query	911	ESX1	0.3034	ARCHS4 Coexpression,0.3034	ARHGEF26,BEND4
gene_set_query	912	ZNF845	0.3041	ARCHS4 Coexpression,0.3041	NFIX,ZNF649
gene_set_query	913	PAX3	0.3041	Enrichr Queries,0.3041	FOXA1,DLX1,DLX2,ZBTB16,IRX3,GATA2,TBX3,IGF1R,TMEFF2,CCND1,MYC,BMPR1B
gene_set_query	914	ZNF629	0.3048	Enrichr Queries,0.3048	NFIX,GDF15,IRS1,NEDD4L,IRS2,CLU,DHRS3,CCND1,MYC,FASN,ERGIC1,FKBP5
gene_set_query	915	PRDM12	0.3049	GTEx Coexpression,0.3049	CGREF1,DLX1,ATP6V0E2
gene_set_query	916	ZNF143	0.3051	ENCODE ChIP-seq,0.3051	GLYATL1,ABHD2,EPHX2,SLC2A12,ENDOD1,IRS2,CROT,ACADSB,CLU,KLF15,F5,KRTCAP3,SLC25A37,CYP2U1,ZNF649,HSBP1L1,MYO6,PRR16,ZNF502,NCAM2,ZNF577,ZNF135
gene_set_query	917	ZFP37	0.3053	ARCHS4 Coexpression,0.3053	FAM110B,TRIM36
gene_set_query	918	NFATC1	0.3056	Enrichr Queries,0.3056	NFIX,GDF15,ZBTB16,IRS2,GATA2,CLU,DHRS3,IGF1R,SOCS2,CCND1,MYC,PMEPA1
gene_set_query	919	YY2	0.3065	ARCHS4 Coexpression,0.3065	BEND4,SH3RF1
gene_set_query	920	ZSCAN22	0.307	Enrichr Queries,0.307	NFIX,CITED2,GDF15,IRS2,DHRS3,IGF1R,AKAP12,CCND1,MYC,FASN,KLF9,FKBP5
gene_set_query	921	NKX63	0.3071	ARCHS4 Coexpression,0.3071	FASN,ACACA
gene_set_query	922	ZNF121	0.3077	ARCHS4 Coexpression,0.3077	NEDD4L,GULP1
gene_set_query	923	HSFX1	0.308	GTEx Coexpression,0.308	FAM110B,PPM1K,PDLIM5
gene_set_query	924	LCORL	0.3084	ARCHS4 Coexpression,0.3084	TRIM36,ERGIC1
gene_set_query	925	ZNF558	0.3084	Enrichr Queries,0.3084	ARRDC4,IL1R1,CITED2,GDF15,DHRS3,SOCS2,CCND1,MYC,TP53INP1,PMEPA1,RHOU,PAG1
gene_set_query	926	ZNF468	0.3093	GTEx Coexpression,0.3093	GALNT7,ERGIC1,ZSCAN18
gene_set_query	927	ZNF286A	0.3096	ARCHS4 Coexpression,0.3096	IDH1,ZNF649
gene_set_query	928	ZNF205	0.3099	GTEx Coexpression,0.3099	SMO,DOCK8,NME3
gene_set_query	929	HIVEP1	0.3105	Enrichr Queries,0.3105	CITED2,IRS1,NEDD4L,IRS2,ELL2,IGF1R,AKAP12,SOCS2,CCND1,MYC,KLF9,PMEPA1
gene_set_query	930	HDX	0.3108	ARCHS4 Coexpression,0.3108	FAM110B,ERGIC1
gene_set_query	931	ZBTB25	0.3113	Enrichr Queries,0.3113	CITED2,GDF15,IRS1,IRS2,DHRS3,IGF1R,SOCS2,CCND1,MYC,KLF9,GC,FKBP5
gene_set_query	932	ZNF181	0.312	ARCHS4 Coexpression,0.312	TRIM36,ERGIC1
gene_set_query	933	ZNF532	0.3124	GTEx Coexpression,0.3124	NFIX,CYP2U1,ANKH
gene_set_query	934	TIGD4	0.3127	ARCHS4 Coexpression,0.3127	IDH1,TRIM36
gene_set_query	935	PLSCR1	0.313	GTEx Coexpression,0.313	STEAP4,IL1R1,BMX
gene_set_query	936	INSM2	0.3143	GTEx Coexpression,0.3143	CGREF1,DLX1,NCAM2
gene_set_query	937	ZNF682	0.3145	ARCHS4 Coexpression,0.3145	FAM110B,ERGIC1
gene_set_query	938	TBPL2	0.3149	GTEx Coexpression,0.3149	CWH43,SLC26A3,TRPM4
gene_set_query	939	ZNF227	0.3151	ARCHS4 Coexpression,0.3151	ITGB5,ERGIC1
gene_set_query	940	ZNF860	0.3155	GTEx Coexpression,0.3155	CWH43,AQP3,RHOD
gene_set_query	941	ZNF438	0.3157	ARCHS4 Coexpression,0.3157	EGF,ARHGAP6
gene_set_query	942	ZBTB22	0.3162	Enrichr Queries,0.3162	CITED2,GDF15,IRS2,DHRS3,SOCS2,CCND1,MYC,FASN,TP53INP1,KLF9,RHOU,GC
gene_set_query	943	ZNF483	0.3167	GTEx Coexpression,0.3167	SLC25A27,ZNF135,ZSCAN18
gene_set_query	944	FOXN4	0.317	Enrichr Queries,0.317	FOXA1,GDF15,ZBTB16,IRX3,GREB1,CLU,KLF15,TBX3,ALDH1A3,CUX2,CCND1,RHOU
gene_set_query	945	ZNF711	0.317	ARCHS4 Coexpression,0.317	DLX2,HOXA13
gene_set_query	946	ZMAT4	0.3174	GTEx Coexpression,0.3174	PPP3CA,CGREF1,NETO1
gene_set_query	947	ERF	0.3177	Enrichr Queries,0.3177	NFIX,CITED2,GDF15,IRS2,AKAP12,CCND1,MYC,FASN,KLF9,PMEPA1,GC,FKBP5
gene_set_query	948	ZNF195	0.3182	ARCHS4 Coexpression,0.3182	IDH1,ERGIC1
gene_set_query	949	AHDC1	0.3186	GTEx Coexpression,0.3186	NFIX,CWH43,AQP3
gene_set_query	950	ZNF569	0.3194	ARCHS4 Coexpression,0.3194	TRIM36,ERGIC1
gene_set_query	951	CEBPG	0.3199	GTEx Coexpression,0.3199	MYBPC1,SMPDL3A,ZNF135
gene_set_query	952	ZIC1	0.32	ARCHS4 Coexpression,0.32	CTNND2,ZSCAN18
gene_set_query	953	ZNF548	0.3205	Enrichr Queries,0.3205	ARRDC4,CITED2,IRS2,PPM1K,IGF1R,SOCS2,MYC,TP53INP1,KLF9,ZNF577,PAG1,ZSCAN18
gene_set_query	954	YBX2	0.3219	Enrichr Queries,0.3219	GDF15,ZBTB16,EPHX2,IRX3,CLU,KLF15,DHRS3,CCND1,MYC,FASN,TCEA3,GC
gene_set_query	955	MEIS3	0.3226	Enrichr Queries,0.3226	ARRDC4,NFIX,CITED2,GDF15,IRS1,IGF1,CLU,DHRS3,AKAP12,CCND1,PMEPA1,ATP6V0E2
gene_set_query	956	ZNF556	0.323	GTEx Coexpression,0.323	MYBPC1,NFIX,TCEA3
gene_set_query	957	ZNF266	0.3231	ARCHS4 Coexpression,0.3231	ITGB5,DOCK8
gene_set_query	958	FLI1	0.3232	ReMap ChIP-seq,0.3232	GAMT,NPDC1,PSCA,DCXR,HPN,OPLAH,HOXA13,FGFRL1,GCAT,HOXA11,HOXA10,NUDT8,CCND1,CREB3L4
gene_set_query	959	MSGN1	0.3234	Enrichr Queries,0.3234	FOXA1,DLX2,GDF15,IRS1,ZBTB16,IRS2,ADRB2,DHRS3,TBX3,ALDH1A3,CCND1,MYC
gene_set_query	960	PBX4	0.3236	GTEx Coexpression,0.3236	CSGALNACT1,PLEKHH1,FGFRL1
gene_set_query	961	ZNF700	0.3243	ARCHS4 Coexpression,0.3243	ITGB5,DOCK8
gene_set_query	962	HIVEP3	0.3248	Enrichr Queries,0.3248	NFIX,GDF15,NEDD4L,IRS2,DHRS3,IGF1R,AKAP12,CCND1,MYC,KLF9,PMEPA1,PAG1
gene_set_query	963	RBPJ	0.3249	ARCHS4 Coexpression,0.3249	GRIN3A,ERGIC1
gene_set_query	964	ZNF322	0.3256	ARCHS4 Coexpression,0.3256	IDH1,GULP1
gene_set_query	965	ASCL4	0.3261	GTEx Coexpression,0.3261	DLX2,ARHGEF37,CWH43
gene_set_query	966	ATF3	0.3262	Enrichr Queries,0.3262	CITED2,GDF15,IRS2,ADRB2,CLU,DHRS3,AKAP12,SOCS2,CCND1,MYC,FASN,KLF9
gene_set_query	967	CREB3	0.3267	GTEx Coexpression,0.3267	CCDC74B,RAMP1,ZSCAN18
gene_set_query	968	THAP2	0.3268	ARCHS4 Coexpression,0.3268	TRIM36,ERGIC1
gene_set_query	969	ZFHX2	0.3269	Enrichr Queries,0.3269	NFIX,CITED2,GDF15,NEDD4L,IRS2,IQGAP2,IGF1R,AKAP12,SOCS2,CCND1,KLF9,PMEPA1
gene_set_query	970	ZNF431	0.3273	GTEx Coexpression,0.3273	CWH43,AQP3,RHOD
gene_set_query	971	ZUP1	0.3274	ARCHS4 Coexpression,0.3274	IDH1,ERGIC1
gene_set_query	972	ZNF721	0.328	ARCHS4 Coexpression,0.328	SLC30A4,ERGIC1
gene_set_query	973	ZBED6	0.3286	ARCHS4 Coexpression,0.3286	ABHD2,GC
gene_set_query	974	MGA	0.3292	ARCHS4 Coexpression,0.3292	ARHGEF26,ACACA
gene_set_query	975	ZNF77	0.3298	Enrichr Queries,0.3298	ARRDC4,NFIX,GDF15,IRS1,IRS2,DHRS3,SOCS2,CCND1,MYC,FASN,KLF9,PMEPA1
gene_set_query	976	ZNF8	0.3305	Enrichr Queries,0.3305	NFIX,CITED2,GDF15,IRS1,ZBTB16,NEDD4L,IRS2,IGF1R,CCND1,MYC,KLF9,GC
gene_set_query	977	ZXDC	0.3312	Enrichr Queries,0.3312	NFIX,GDF15,ABHD2,NEDD4L,IRS2,KLF15,IGF1R,CCND1,MYC,KLF9,PDLIM5,FKBP5
gene_set_query	978	HOXB1	0.3317	GTEx Coexpression,0.3317	CWH43,AQP3,RHOD
gene_set_query	979	SOX15	0.3323	GTEx Coexpression,0.3323	CWH43,AQP3,RHOD
gene_set_query	980	ZBTB18	0.3323	ARCHS4 Coexpression,0.3323	NFIX,CTNND2
gene_set_query	981	ZNF17	0.3329	ARCHS4 Coexpression,0.3329	ITGB5,ERGIC1
gene_set_query	982	ZNF70	0.3333	Enrichr Queries,0.3333	NFIX,THRB,GDF15,IRS1,IRS2,IGF1R,AKAP12,CCND1,MYC,TP53INP1,RHOU,PDLIM5
gene_set_query	983	FOXN2	0.3335	ARCHS4 Coexpression,0.3335	NPDC1,DOCK8
gene_set_query	984	HBP1	0.3335	GTEx Coexpression,0.3335	CTNND2,ZBTB16,ATP6V0E2
gene_set_query	985	ZNF20	0.334	Enrichr Queries,0.334	CITED2,GDF15,IRS2,DHRS3,IGF1R,SOCS2,CCND1,MYC,TP53INP1,RHOU,PDE9A,ZSCAN18
gene_set_query	986	ZNF730	0.3342	ARCHS4 Coexpression,0.3342	IDH1,GULP1
gene_set_query	987	ZNF781	0.3348	Enrichr Queries,0.3348	ARRDC4,CSGALNACT1,ZBTB16,AKAP12,SOCS2,GHR,SLC25A27,ZNF229,ZNF502,ZNF577,ZNF135,ZSCAN18
gene_set_query	988	RAX	0.3348	ARCHS4 Coexpression,0.3348	SMO,ZSCAN18
gene_set_query	989	JUN	0.3354	ARCHS4 Coexpression,0.3354	KLF9,IRS2
gene_set_query	990	NKX62	0.336	ARCHS4 Coexpression,0.336	CTNND2,PLEKHH1
gene_set_query	991	L3MBTL4	0.336	GTEx Coexpression,0.336	CYP39A1,ASB9,CWH43
gene_set_query	992	ZNF429	0.3362	Enrichr Queries,0.3362	ARRDC4,THRB,CITED2,NEDD4L,IQGAP2,ACADSB,IGF1R,TP53INP1,RHOU,ZNF577,ZNF135,ZSCAN18
gene_set_query	993	PROP1	0.3366	ARCHS4 Coexpression,0.3366	SLC25A27,CCND1
gene_set_query	994	ZNF398	0.3369	Enrichr Queries,0.3369	CITED2,GDF15,ABHD2,NEDD4L,IRS2,IGF1R,SOCS2,BDH1,CCND1,MYC,RHOU,FKBP5
gene_set_query	995	PURG	0.3372	ARCHS4 Coexpression,0.3372	CTNND2,TRIM36
gene_set_query	996	MYT1L	0.3373	GTEx Coexpression,0.3373	PPP3CA,CGREF1,ATP6V0E2
gene_set_query	997	ZSCAN12	0.3376	Enrichr Queries,0.3376	ARRDC4,CITED2,GDF15,IRS1,NEDD4L,IRS2,AKAP12,SOCS2,CCND1,MYC,KLF9,FKBP5
gene_set_query	998	IKZF1	0.3378	ARCHS4 Coexpression,0.3378	DOCK8,PAG1
gene_set_query	999	ZFP64	0.339	Enrichr Queries,0.339	CITED2,GDF15,IRS1,NEDD4L,IRS2,TBX3,IGF1R,CCND1,MYC,KLF9,PMEPA1,FKBP5
gene_set_query	1000	ZNF639	0.3391	GTEx Coexpression,0.3391	LATS2,ZNF649
gene_set_query	1001	ZBTB47	0.3397	ARCHS4 Coexpression,0.3397	MYBPC1,NFIX
gene_set_query	1002	ZFAT	0.3397	Enrichr Queries,0.3397	CITED2,GDF15,IRS1,ZBTB16,NEDD4L,IRS2,IQGAP2,IGF1R,SLC22A23,MYC,PMEPA1,FKBP5
gene_set_query	1003	E2F7	0.3401	ReMap ChIP-seq,0.3401	SPON2,IL1R1,CITED2,IRS1,DHRS3,TBX3,PBLD,SOCS2,CCND1,ZNF649,KLF9,ZNF613,ZNF577
gene_set_query	1004	JAZF1	0.3404	GTEx Coexpression,0.3404	MYO6,FBXL7
gene_set_query	1005	GLI4	0.341	GTEx Coexpression,0.341	LATS2,NME3
gene_set_query	1006	RHOXF1	0.3412	Enrichr Queries,0.3412	FOXA1,MAOA,ZBTB16,ADRB2,CLGN,SOCS2,GHR,SLC25A27,ALDH1A3,AGTR1,PI15,RAMP1
gene_set_query	1007	ATF6	0.3419	Enrichr Queries,0.3419	HOMER2,CITED2,ABHD2,IRS2,ELL2,DHRS3,IGF1R,SOCS2,CCND1,MYC,KLF9,FKBP5
gene_set_query	1008	ZNF518A	0.3423	GTEx Coexpression,0.3423	ZNF577,ZNF135
gene_set_query	1009	ZKSCAN3	0.3426	Enrichr Queries,0.3426	CITED2,NEDD4L,IRS2,KLF15,DHRS3,IGF1R,AKAP12,SOCS2,CCND1,MYC,KLF9,GC
gene_set_query	1010	FOXP3	0.3428	ARCHS4 Coexpression,0.3428	DOCK8,PAG1
gene_set_query	1011	ZNF462	0.3434	ARCHS4 Coexpression,0.3434	ARHGEF26,FAM110B
gene_set_query	1012	RORB	0.3435	GTEx Coexpression,0.3435	CTNND2,NCAM2
gene_set_query	1013	EVX2	0.3447	Enrichr Queries,0.3447	FOXA1,HOXA10,DLX1,DLX2,NFIX,IRX3,GATA2,HOXB13,HOXA13,TBX3,HOXA11
gene_set_query	1014	BBX	0.3447	GTEx Coexpression,0.3447	CCDC74B,TRIM36
gene_set_query	1015	DMRT3	0.3454	Enrichr Queries,0.3454	FOXA1,HOXA10,DLX1,DLX2,NFIX,CUX2,ZBTB16,IRX3,GATA2,HOXB13,TBX3
gene_set_query	1016	SCRT2	0.3464	ARCHS4 Coexpression,0.3464	CUX2,CTNND2
gene_set_query	1017	BARHL2	0.3471	ARCHS4 Coexpression,0.3471	CTNND2,ZSCAN18
gene_set_query	1018	UNCX	0.3483	ARCHS4 Coexpression,0.3483	MYO6,ZSCAN18
gene_set_query	1019	MBD6	0.3491	GTEx Coexpression,0.3491	PLEKHH1,ZNF135
gene_set_query	1020	ZNF709	0.3495	ARCHS4 Coexpression,0.3495	FAM110B,TP53INP1
gene_set_query	1021	ZNF644	0.3497	GTEx Coexpression,0.3497	CYP2U1,ZNF649
gene_set_query	1022	KDM2A	0.3501	ARCHS4 Coexpression,0.3501	DOCK8,ERGIC1
gene_set_query	1023	ZNF24	0.3502	ReMap ChIP-seq,0.3502	IL1R1,GDF15,HPN,SLC2A12,SLC43A1,IQGAP2,DHRS3,SOCS2,SLC25A37,TRPV6,KLF9,ERGIC1,SPDEF
gene_set_query	1024	ZNF488	0.3519	Enrichr Queries,0.3519	ALDH1A3,CCND1,CITED2,GDF15,IRS1,NEDD4L,PMEPA1,RHOU,IRS2,DHRS3,FKBP5
gene_set_query	1025	POU3F1	0.3526	Enrichr Queries,0.3526	DLX2,NFIX,CUX2,CCND1,CITED2,GDF15,MYC,ZBTB16,IRX3,PMEPA1,IRS2
gene_set_query	1026	ZBTB26	0.3528	GTEx Coexpression,0.3528	ZNF502,ZNF577
gene_set_query	1027	GLI3	0.3533	Enrichr Queries,0.3533	AKAP12,COLEC12,MME,CCND1,IRS1,MYC,PMEPA1,IGF1,BMPR1B,CLU,IGF1R
gene_set_query	1028	TCF7	0.3538	ARCHS4 Coexpression,0.3538	DOCK8,PAG1
gene_set_query	1029	ZNF595	0.354	Enrichr Queries,0.354	MME,CCND1,GDF15,MYC,TP53INP1,PMEPA1,RHOU,IRS2,DHRS3,IGF1R,FKBP5
gene_set_query	1030	TGIF2	0.3547	Enrichr Queries,0.3547	SOCS2,CCND1,CITED2,GDF15,IRS1,MYC,PMEPA1,IRS2,DHRS3,IGF1R,FKBP5
gene_set_query	1031	PEG3	0.355	ARCHS4 Coexpression,0.355	CTNND2,F5
gene_set_query	1032	LEF1	0.3554	Enrichr Queries,0.3554	AKAP12,SOCS2,MME,CCND1,MYC,ZBTB16,PMEPA1,IRS2,IGF1,TBX3,IGF1R
gene_set_query	1033	ZNF573	0.3561	Enrichr Queries,0.3561	SOCS2,CITED2,GDF15,MYC,NEDD4L,ZNF613,IRS2,IQGAP2,ZNF577,ZSCAN18,IGF1R
gene_set_query	1034	ZNF616	0.3578	GTEx Coexpression,0.3578	ERGIC1,TBX3
gene_set_query	1035	PAX1	0.3581	ARCHS4 Coexpression,0.3581	ACSL3,HOXB13
gene_set_query	1036	ZNF728	0.3587	ARCHS4 Coexpression,0.3587	BEND4,ERGIC1
gene_set_query	1037	POGK	0.3591	GTEx Coexpression,0.3591	CTNND2,MBOAT2
gene_set_query	1038	GPBP1	0.3593	ARCHS4 Coexpression,0.3593	ITGB5,ERGIC1
gene_set_query	1039	ZFPM2	0.3597	Enrichr Queries,0.3597	AKAP12,GHR,COLEC12,NFIX,MME,IRS1,MYC,ZBTB16,IGF1,SLC4A4,CLU
gene_set_query	1040	GTF2B	0.36	ARCHS4 Coexpression,0.36	CITED2,ERGIC1
gene_set_query	1041	ZNF287	0.3606	ARCHS4 Coexpression,0.3606	ASB9,TRIM36
gene_set_query	1042	L3MBTL3	0.3609	GTEx Coexpression,0.3609	DOCK8,ERGIC1
gene_set_query	1043	ZNF439	0.3622	GTEx Coexpression,0.3622	SLC25A27,ZNF135
gene_set_query	1044	ZNF84	0.3624	ARCHS4 Coexpression,0.3624	FAM110B,TRIM36
gene_set_query	1045	TBR1	0.363	ARCHS4 Coexpression,0.363	ATP6V0E2,ZSCAN18
gene_set_query	1046	ZNF737	0.3634	GTEx Coexpression,0.3634	PLEKHH1,FGFRL1
gene_set_query	1047	NOBOX	0.364	Enrichr Queries,0.364	ARRDC4,FOXA1,DLX1,ALDH1A3,DLX2,CUX2,STEAP4,MYC,ZBTB16,GATA2,DHRS3
gene_set_query	1048	RAX2	0.364	GTEx Coexpression,0.364	NPDC1,SLC25A27
gene_set_query	1049	ZNF705D	0.3643	ARCHS4 Coexpression,0.3643	BEND4,HOXB13
gene_set_query	1050	PAX5	0.3644	ENCODE ChIP-seq,0.3644	MCCC2,LATS2,CITED2,DOCK8,PPM1K
gene_set_query	1051	GTF2IRD1	0.3647	GTEx Coexpression,0.3647	MYBPC1,USP54
gene_set_query	1052	ETS1	0.3653	GTEx Coexpression,0.3653	IL1R1,DOCK8
gene_set_query	1053	GCM2	0.3659	GTEx Coexpression,0.3659	ACSL3,PRLR
gene_set_query	1054	ZKSCAN5	0.3661	Enrichr Queries,0.3661	SOCS2,CCND1,CITED2,GDF15,IRS1,MYC,KLF9,NEDD4L,PMEPA1,IRS2,GC
gene_set_query	1055	ZNF184	0.3667	ARCHS4 Coexpression,0.3667	ITGB5,ERGIC1
gene_set_query	1056	ZNF585A	0.3668	Enrichr Queries,0.3668	AKAP12,SOCS2,GDF15,MYC,ZNF649,TP53INP1,IRS2,ZNF577,PAG1,ZSCAN18,IGF1R
gene_set_query	1057	BAZ2B	0.3678	GTEx Coexpression,0.3678	SLC25A27,ZNF135
gene_set_query	1058	ZFP82	0.3682	Enrichr Queries,0.3682	AKAP12,SOCS2,CCND1,CITED2,GDF15,MYC,ZBTB16,NEDD4L,PMEPA1,DHRS3,ZSCAN18
gene_set_query	1059	ZNF236	0.3684	GTEx Coexpression,0.3684	CCDC74B,BEND4
gene_set_query	1060	BCL11B	0.3686	ARCHS4 Coexpression,0.3686	DOCK8,PAG1
gene_set_query	1061	LTF	0.369	GTEx Coexpression,0.369	GLYATL2,CHPT1
gene_set_query	1062	ZSCAN4	0.3692	ARCHS4 Coexpression,0.3692	MYC,AMD1
gene_set_query	1063	FOXD4L4	0.3696	GTEx Coexpression,0.3696	GHR,PEX11A
gene_set_query	1064	ZNF3	0.3703	GTEx Coexpression,0.3703	CTNND2,NCAM2
gene_set_query	1065	PBX3	0.3704	Enrichr Queries,0.3704	SOCS2,NFIX,CCND1,CITED2,MYC,KLF9,NEDD4L,PMEPA1,IRS2,DHRS3,IGF1R
gene_set_query	1066	ZNF551	0.3704	ARCHS4 Coexpression,0.3704	ZNF649,BEND4
gene_set_query	1067	ZNF660	0.3709	GTEx Coexpression,0.3709	SLC25A27,ZNF135
gene_set_query	1068	MLX	0.3727	GTEx Coexpression,0.3727	ZNF135,ZSCAN18
gene_set_query	1069	ZNF467	0.3732	Enrichr Queries,0.3732	SOCS2,CCND1,CITED2,GDF15,KLF9,PMEPA1,RHOU,IRS2,GC,CLU,DHRS3
gene_set_query	1070	ZNF267	0.3735	ARCHS4 Coexpression,0.3735	DOCK8,PLA2G7
gene_set_query	1071	NR2E3	0.3739	Enrichr Queries,0.3739	FOXA1,CUX2,THRB,MME,GDF15,MYC,ZBTB16,IRX3,DHRS3,TBX3,SPDEF
gene_set_query	1072	ZNF561	0.374	GTEx Coexpression,0.374	CWH43,ATP6V0E2
gene_set_query	1073	TP73	0.3746	Enrichr Queries,0.3746	NFIX,THRB,CCND1,GDF15,IRS1,MYC,FASN,ZBTB16,GATA2,DHRS3,IGF1R
gene_set_query	1074	ZNF655	0.3753	ARCHS4 Coexpression,0.3753	DOCK8,PAG1
gene_set_query	1075	ZNF740	0.3759	ARCHS4 Coexpression,0.3759	SPON2,ERGIC1
gene_set_query	1076	ZNF579	0.3765	GTEx Coexpression,0.3765	MYBPC1,TCEA3
gene_set_query	1077	USF3	0.3771	GTEx Coexpression,0.3771	MYBPC1,TCEA3
gene_set_query	1078	FOXR2	0.3771	ARCHS4 Coexpression,0.3771	ANKRD30B,POTEE
gene_set_query	1079	STAT5B	0.379	ARCHS4 Coexpression,0.379	SLC25A37,DOCK8
gene_set_query	1080	ZIC5	0.3796	Enrichr Queries,0.3796	FOXA1,SOCS2,DLX1,DLX2,CCND1,GDF15,IRS1,MYC,IRX3,BEND4,TBX3
gene_set_query	1081	ZNF747	0.3802	GTEx Coexpression,0.3802	MYO6,FKBP5
gene_set_query	1082	CTCFL	0.3805	ReMap ChIP-seq,0.3805	GAMT,NPDC1,NFIX,DCXR,NME3,GATA2,FGFRL1,GCAT,HOXA11,HOXA10,NUDT8,CCND1,FASN
gene_set_query	1083	ZNF71	0.3808	GTEx Coexpression,0.3808	ZNF649,MYO6
gene_set_query	1084	ZNF423	0.3808	ARCHS4 Coexpression,0.3808	SMO,CTNND2
gene_set_query	1085	ZBTB44	0.3814	ARCHS4 Coexpression,0.3814	MYBPC1,BEND4
gene_set_query	1086	TGIF2LY	0.3821	ARCHS4 Coexpression,0.3821	MYC,KLF15
gene_set_query	1087	LMX1A	0.3833	GTEx Coexpression,0.3833	NPDC1,CCDC74B
gene_set_query	1088	ARGFX	0.3839	GTEx Coexpression,0.3839	PEBP4,PDLIM5
gene_set_query	1089	SPI1	0.3841	Literature ChIP-seq,0.3841	GAMT,CSGALNACT1,DLX2,STEAP4,AMD1,AQP3,AZGP1,NUDT8,H2AFJ,FAM110B,KLF9,PI15,TRIM36,RHOU,CHPT1,HMGCS2,GGT1,ACPP,TMED6,PDE9A,PLA1A
gene_set_query	1090	ZNF816	0.3846	GTEx Coexpression,0.3846	GALNT7,ZNF613
gene_set_query	1091	SKOR2	0.3851	ARCHS4 Coexpression,0.3851	FASN,KLF15
gene_set_query	1092	ZNF207	0.3857	ARCHS4 Coexpression,0.3857	AMD1,ACACA
gene_set_query	1093	LHX4	0.386	Enrichr Queries,0.386	FOXA1,DLX1,DLX2,CUX2,CCND1,GDF15,IRS1,IRX3,GREB1,NEDD4L,GATA2
gene_set_query	1094	NANOGNB	0.3864	GTEx Coexpression,0.3864	ASB9,BEND4
gene_set_query	1095	ZBTB46	0.387	ARCHS4 Coexpression,0.387	SMO,ZSCAN18
gene_set_query	1096	FOXP2	0.3875	Enrichr Queries,0.3875	AKAP12,GHR,NFIX,THRB,MME,ZBTB16,NEDD4L,IGF1,BMPR1B,SLC4A4,IGF1R
gene_set_query	1097	TIGD1	0.3895	GTEx Coexpression,0.3895	ITGB5,ZNF135
gene_set_query	1098	ZNF497	0.3907	ARCHS4 Coexpression,0.3907	MLPH,ZSCAN18
gene_set_query	1099	ZBTB9	0.391	Enrichr Queries,0.391	SOCS2,CCND1,CITED2,GDF15,MYC,FASN,KLF9,NEDD4L,IRS2,IGF1R,FKBP5
gene_set_query	1100	LYL1	0.3913	ARCHS4 Coexpression,0.3913	SLC25A37,GATA2
gene_set_query	1101	ZNF775	0.3927	GTEx Coexpression,0.3927	LATS2,NME3
gene_set_query	1102	CDX4	0.3931	ARCHS4 Coexpression,0.3931	IDH1,HOXA13
gene_set_query	1103	ZNF746	0.3937	ARCHS4 Coexpression,0.3937	SLC25A37,DOCK8
gene_set_query	1104	ZXDA	0.3939	Enrichr Queries,0.3939	NFIX,CCND1,MAOA,CITED2,GDF15,IRS1,MYC,KLF9,NEDD4L,PMEPA1,IRS2
gene_set_query	1105	ANHX	0.3956	ARCHS4 Coexpression,0.3956	ASB9,BEND4
gene_set_query	1106	ZNF782	0.3958	GTEx Coexpression,0.3958	SPINK1,SLC43A1
gene_set_query	1107	POU2F3	0.396	Enrichr Queries,0.396	AKAP12,FOXA1,ALDH1A3,MME,CCND1,CITED2,GDF15,ZBTB16,ADRB2,ACPP,AQP3
gene_set_query	1108	INSM1	0.3964	GTEx Coexpression,0.3964	NPDC1,SLC25A27
gene_set_query	1109	ZBTB40	0.3967	Enrichr Queries,0.3967	CCND1,CITED2,GDF15,MYC,FASN,KLF9,NEDD4L,IRS2,DHRS3,IGF1R,FKBP5
gene_set_query	1110	ZNF541	0.3974	Enrichr Queries,0.3974	HOXA10,SCUBE2,SPON2,VIPR1,CUX2,GDF15,ZBTB16,GNG7,IRX3,IRS2,ADRB2
gene_set_query	1111	TET3	0.398	ARCHS4 Coexpression,0.398	SLC25A37,DOCK8
gene_set_query	1112	ZNF808	0.3995	GTEx Coexpression,0.3995	CTNND2,NCAM2
gene_set_query	1113	PREB	0.3999	ARCHS4 Coexpression,0.3999	DCXR,SLC43A1
gene_set_query	1114	ZNF384	0.4007	GTEx Coexpression,0.4007	CTNND2,NCAM2
gene_set_query	1115	NHLH1	0.4017	ARCHS4 Coexpression,0.4017	CTNND2,ZSCAN18
gene_set_query	1116	PAX7	0.402	GTEx Coexpression,0.402	GAMT,MYBPC1
gene_set_query	1117	ZIC2	0.4023	ARCHS4 Coexpression,0.4023	IDH1,GULP1
gene_set_query	1118	IKZF4	0.4024	Enrichr Queries,0.4024	SOCS2,NFIX,GDF15,MYC,ZBTB16,NEDD4L,PMEPA1,IRS2,IGF1,IGF1R,FKBP5
gene_set_query	1119	FOXE3	0.4026	GTEx Coexpression,0.4026	CYP2U1,BMPR1B
gene_set_query	1120	ZBTB45	0.4031	Enrichr Queries,0.4031	NFIX,CCND1,CITED2,GDF15,MYC,FASN,KLF9,PMEPA1,IRS2,GC,DHRS3
gene_set_query	1121	ZNF474	0.4048	ARCHS4 Coexpression,0.4048	AQP3,MSMB
gene_set_query	1122	ZIC4	0.4054	ARCHS4 Coexpression,0.4054	CTNND2,ZSCAN18
gene_set_query	1123	POU5F1B	0.4072	ARCHS4 Coexpression,0.4072	RPS4Y1,GULP1
gene_set_query	1124	ZNF277	0.4074	Enrichr Queries,0.4074	CCND1,CITED2,GDF15,MYC,IDH1,AMD1,TP53INP1,KLF9,IRS2,DHRS3,FKBP5
gene_set_query	1125	ZNF534	0.4079	ARCHS4 Coexpression,0.4079	USP54,ZNF135
gene_set_query	1126	THAP8	0.4097	ARCHS4 Coexpression,0.4097	GCAT,ZSCAN18
gene_set_query	1127	ZNF584	0.4108	ReMap ChIP-seq,0.4108	GAMT,DLX1,THRB,ARHGEF37,GDF15,ENDOD1,OPLAH,IGF1R,MLPH,BDH1,TP53INP1,PAG1
gene_set_query	1128	ZNF778	0.411	Enrichr Queries,0.411	AKAP12,NFIX,CCND1,CITED2,GDF15,MYC,FASN,GC,DHRS3,TBX3,IGF1R
gene_set_query	1129	ZNF347	0.4113	GTEx Coexpression,0.4113	CYP2U1,ZNF502
gene_set_query	1130	ZNF564	0.4117	Enrichr Queries,0.4117	ARRDC4,NFIX,CITED2,GDF15,MYC,ZBTB16,TP53INP1,KLF9,RHOU,IQGAP2,PAG1
gene_set_query	1131	ELF1	0.4122	ARCHS4 Coexpression,0.4122	DOCK8,IQGAP2
gene_set_query	1132	ZNF554	0.4131	Enrichr Queries,0.4131	CITED2,GDF15,GNG7,TP53INP1,KLF9,RHOU,IRS2,GC,CLU,PAG1,DHRS3
gene_set_query	1133	ZNF317	0.4134	ARCHS4 Coexpression,0.4134	DOCK8,AMD1
gene_set_query	1134	TIGD5	0.4138	Enrichr Queries,0.4138	GAMT,SOCS2,NFIX,CITED2,GDF15,IRS1,MYC,FASN,NME3,PMEPA1,IRS2
gene_set_query	1135	ZC3H8	0.4141	ReMap ChIP-seq,0.4141	GDF15,ABHD2,SLC43A1,KLK4,RHOD,GCAT,TBX3,SLC25A37,MLPH,CREB3L4,MYC,ANG
gene_set_query	1136	KLF2	0.4146	Literature ChIP-seq,0.4146	KLF9,GATA2,HOXB13
gene_set_query	1137	ZNF346	0.4152	Enrichr Queries,0.4152	CCND1,CITED2,GDF15,IRS1,MYC,FASN,NEDD4L,IRS2,ELL2,IGF1R,FKBP5
gene_set_query	1138	ZNF273	0.4157	GTEx Coexpression,0.4157	IRX3,CWH43
gene_set_query	1139	NFE2	0.4158	ARCHS4 Coexpression,0.4158	SLC25A37,GATA2
gene_set_query	1140	ZNF596	0.416	Enrichr Queries,0.416	ARRDC4,SOCS2,GHR,CITED2,GDF15,EPHX2,TP53INP1,PMEPA1,RHOU,IRS2,CLU
gene_set_query	1141	ZBTB1	0.4167	Enrichr Queries,0.4167	SOCS2,CCND1,CITED2,IRS1,MYC,KLF9,PMEPA1,IRS2,ACSL3,ELL2,FKBP5
gene_set_query	1142	PIN1	0.4175	GTEx Coexpression,0.4175	CTNND2,ATP6V0E2
gene_set_query	1143	DMRT1	0.4177	ARCHS4 Coexpression,0.4177	ARHGEF26,BEND4
gene_set_query	1144	ZNF707	0.4181	Enrichr Queries,0.4181	SOCS2,BDH1,CITED2,GDF15,MYC,FASN,ZBTB16,TP53INP1,IRS2,OPLAH,DHRS3
gene_set_query	1145	PRDM4	0.4188	GTEx Coexpression,0.4188	MME,CITED2
gene_set_query	1146	TFAP4	0.4188	Enrichr Queries,0.4188	NFIX,CCND1,CITED2,GDF15,MYC,FASN,KLF9,IRS2,GC,DHRS3,FKBP5
gene_set_query	1147	ZNF773	0.4202	Enrichr Queries,0.4202	SOCS2,CITED2,GDF15,MYC,TP53INP1,KLF9,IRS2,ZNF577,SLC4A4,ZSCAN18,IGF1R
gene_set_query	1148	ZNF677	0.4209	Enrichr Queries,0.4209	AKAP12,SOCS2,GHR,CUX2,THRB,ZBTB16,ZNF649,ZNF229,ZNF502,ZNF135,ZSCAN18
gene_set_query	1149	CEBPZ	0.4214	ARCHS4 Coexpression,0.4214	AMD1,BEND4
gene_set_query	1150	TEAD2	0.422	ARCHS4 Coexpression,0.422	SMO,ITGB5
gene_set_query	1151	ZNF623	0.4224	Enrichr Queries,0.4224	CCND1,CITED2,GDF15,IRS1,MYC,TP53INP1,NEDD4L,PMEPA1,IRS2,IGF1R,FKBP5
gene_set_query	1152	KDM2B	0.4226	ARCHS4 Coexpression,0.4226	DOCK8,BEND4
gene_set_query	1153	FOXK1	0.4231	Enrichr Queries,0.4231	AKAP12,NFIX,CCND1,IRS1,MYC,FASN,ABHD2,KLF9,NEDD4L,IRS2,IGF1R
gene_set_query	1154	ZNF304	0.4231	GTEx Coexpression,0.4231	HERC3,ZNF502
gene_set_query	1155	FOXI3	0.4244	GTEx Coexpression,0.4244	IRX3,CWH43
gene_set_query	1156	POU6F2	0.4244	ARCHS4 Coexpression,0.4244	TTR,GC
gene_set_query	1157	ZNF319	0.4245	Enrichr Queries,0.4245	NFIX,CCND1,CITED2,GDF15,IRS1,MYC,FASN,PMEPA1,RHOU,IRS2,IGF1R
gene_set_query	1158	SETDB2	0.4252	Enrichr Queries,0.4252	AKAP12,SOCS2,CITED2,GDF15,MYC,TP53INP1,IRS2,PPM1K,IQGAP2,PAG1,FKBP5
gene_set_query	1159	ZNF689	0.4257	ARCHS4 Coexpression,0.4257	IDH1,PLEKHH1
gene_set_query	1160	FOXK2	0.4259	Enrichr Queries,0.4259	AKAP12,NFIX,CCND1,MYC,FASN,NEDD4L,PMEPA1,IRS2,ACACA,IGF1R,FKBP5
gene_set_query	1161	TCF20	0.4263	GTEx Coexpression,0.4263	CWH43,AQP3
gene_set_query	1162	HMG20B	0.4269	GTEx Coexpression,0.4269	CGREF1,ATP6V0E2
gene_set_query	1163	TBX6	0.4274	Enrichr Queries,0.4274	CCND1,GDF15,SLC43A1,TCEA3,KLF9,IRS2,ADRB2,GC,KLF15,DHRS3,TBX3
gene_set_query	1164	ELK1	0.4275	GTEx Coexpression,0.4275	PPP3CA,CGREF1
gene_set_query	1165	HELT	0.4275	ARCHS4 Coexpression,0.4275	DLX1,DLX2
gene_set_query	1166	THYN1	0.4281	GTEx Coexpression,0.4281	ATP6V0E2,ZSCAN18
gene_set_query	1167	SP1	0.4281	ARCHS4 Coexpression,0.4281	DOCK8,ERGIC1
gene_set_query	1168	ZNF581	0.4302	Enrichr Queries,0.4302	CCND1,CITED2,GDF15,MYC,FASN,TP53INP1,NME3,IRS2,GC,DHRS3
gene_set_query	1169	ZNF777	0.4306	GTEx Coexpression,0.4306	NFIX,ZNF649
gene_set_query	1170	ZNF48	0.4312	ARCHS4 Coexpression,0.4312	SMO,ZSCAN18
gene_set_query	1171	ZNF562	0.4312	GTEx Coexpression,0.4312	AQP3,RHOD
gene_set_query	1172	ZNF600	0.4316	Enrichr Queries,0.4316	ARRDC4,SOCS2,CITED2,GDF15,TP53INP1,ADRB2,ZNF577,PAG1,DHRS3,FKBP5
gene_set_query	1173	ZNF441	0.4318	ARCHS4 Coexpression,0.4318	TTR,ZNF502
gene_set_query	1174	NHLH2	0.433	ARCHS4 Coexpression,0.433	CTNND2,TRIM36
gene_set_query	1175	IRF5	0.4361	ARCHS4 Coexpression,0.4361	DOCK8,PLA2G7
gene_set_query	1176	CHCHD3	0.4368	GTEx Coexpression,0.4368	PEBP4,PDLIM5
gene_set_query	1177	ZNF212	0.4375	GTEx Coexpression,0.4375	CWH43,RHOD
gene_set_query	1178	ZNF594	0.4381	GTEx Coexpression,0.4381	SLC25A27,ZNF135
gene_set_query	1179	PHF21A	0.4398	ARCHS4 Coexpression,0.4398	SLC25A37,DOCK8
gene_set_query	1180	ZNF155	0.4402	Enrichr Queries,0.4402	SOCS2,CITED2,GDF15,ZNF649,ZNF229,NEDD4L,ZNF613,ZNF502,ZNF577,ZSCAN18
gene_set_query	1181	PKNOX2	0.4404	ARCHS4 Coexpression,0.4404	HOXB13,PLA2G7
gene_set_query	1182	ZNF420	0.4409	Enrichr Queries,0.4409	ARRDC4,SOCS2,CCND1,CITED2,GDF15,MYC,ZNF649,IRS2,ZSCAN18,IGF1R
gene_set_query	1183	E2F5	0.4423	Enrichr Queries,0.4423	AKAP12,SOCS2,CCND1,CITED2,GDF15,MYC,KLF9,PMEPA1,IRS2,IGF1R
gene_set_query	1184	ZNF16	0.4443	GTEx Coexpression,0.4443	ZNF649,ZNF502
gene_set_query	1185	ZBED9	0.4453	ARCHS4 Coexpression,0.4453	SCUBE2,HOXB13
gene_set_query	1186	ZNF296	0.4473	Enrichr Queries,0.4473	SOCS2,CCND1,CITED2,GDF15,MYC,FASN,IRS2,GC,DHRS3,FKBP5
gene_set_query	1187	ZNF491	0.448	GTEx Coexpression,0.448	CYP2U1,ZNF502
gene_set_query	1188	EEA1	0.4493	GTEx Coexpression,0.4493	PRR16,RECK
gene_set_query	1189	MYCL	0.4499	GTEx Coexpression,0.4499	IRX3,CWH43
gene_set_query	1190	ZFP57	0.4509	ARCHS4 Coexpression,0.4509	GATA2,IQGAP2
gene_set_query	1191	FOXJ3	0.4512	GTEx Coexpression,0.4512	MYBPC1,KLF9
gene_set_query	1192	POU2F1	0.4515	ARCHS4 Coexpression,0.4515	ACACA,GULP1
gene_set_query	1193	DMRTC2	0.4516	Enrichr Queries,0.4516	FOXA1,DLX1,DLX2,CUX2,GDF15,ZBTB16,HOXB13,ACPP,HOXA13,PLA1A
gene_set_query	1194	ZNF888	0.4518	GTEx Coexpression,0.4518	GALNT7,KRTCAP3
gene_set_query	1195	RHOXF2	0.4539	ARCHS4 Coexpression,0.4539	POTEE,ARHGAP6
gene_set_query	1196	ZBTB7B	0.4543	GTEx Coexpression,0.4543	CWH43,SMPDL3A
gene_set_query	1197	ZNF91	0.4544	Enrichr Queries,0.4544	AKAP12,CCND1,CITED2,GDF15,MYC,TP53INP1,IRS2,IQGAP2,CLU,FKBP5
gene_set_query	1198	HMG20A	0.4545	ARCHS4 Coexpression,0.4545	IDH1,BEND4
gene_set_query	1199	ZNF382	0.4551	Enrichr Queries,0.4551	ARRDC4,AKAP12,CITED2,GDF15,ZNF649,NEDD4L,IQGAP2,ZNF577,CLU,ZSCAN18
gene_set_query	1200	SPIC	0.4564	ARCHS4 Coexpression,0.4564	LATS2,EPHX2
gene_set_query	1201	ZNF654	0.4607	ARCHS4 Coexpression,0.4607	ARRDC4
gene_set_query	1202	ZNF407	0.4613	ARCHS4 Coexpression,0.4613	DOCK8
gene_set_query	1203	ZNF714	0.4619	ARCHS4 Coexpression,0.4619	ERGIC1
gene_set_query	1204	RLF	0.4625	ARCHS4 Coexpression,0.4625	TRIM36
gene_set_query	1205	ZNF180	0.4631	ARCHS4 Coexpression,0.4631	ITGB5
gene_set_query	1206	ZNF326	0.4636	GTEx Coexpression,0.4636	ARHGEF37,MYO6
gene_set_query	1207	ZNF852	0.4644	ARCHS4 Coexpression,0.4644	ITGB5
gene_set_query	1208	ZNF235	0.4656	ARCHS4 Coexpression,0.4656	ITGB5
gene_set_query	1209	MTERF1	0.4662	ARCHS4 Coexpression,0.4662	ERGIC1
gene_set_query	1210	MECP2	0.4667	GTEx Coexpression,0.4667	SLC25A27,ZSCAN18
gene_set_query	1211	TCFL5	0.4674	ARCHS4 Coexpression,0.4674	ARHGEF26
gene_set_query	1212	ZNF718	0.4687	ARCHS4 Coexpression,0.4687	ERGIC1
gene_set_query	1213	RELA	0.4698	GTEx Coexpression,0.4698	CTNND2,ATP6V0E2
gene_set_query	1214	ZBED5	0.4704	GTEx Coexpression,0.4704	ZNF502,ZNF577
gene_set_query	1215	SGSM2	0.4711	GTEx Coexpression,0.4711	CTNND2,ZSCAN18
gene_set_query	1216	ZNF791	0.4717	GTEx Coexpression,0.4717	ZBTB16,KLF9
gene_set_query	1217	ETV3	0.4723	GTEx Coexpression,0.4723	IRX3,CWH43
gene_set_query	1218	JUNB	0.4729	GTEx Coexpression,0.4729	MYC,ELL2
gene_set_query	1219	ZNF841	0.4729	Enrichr Queries,0.4729	ARRDC4,AKAP12,GDF15,TP53INP1,NEDD4L,IRS2,ZNF577,ELL2,PAG1,DHRS3
gene_set_query	1220	ZNF716	0.4736	ARCHS4 Coexpression,0.4736	CYP4F8
gene_set_query	1221	CREB1	0.4747	ReMap ChIP-seq,0.4747	GAMT,NPDC1,GDF15,DCXR,NME3,OPLAH,GCAT,NUDT8,CREB3L4,FASN,ANG,TRPM4
gene_set_query	1222	ZNF835	0.4758	Enrichr Queries,0.4758	AKAP12,SOCS2,GHR,CUX2,GDF15,CTNND2,ZNF229,ZNF135,PDE9A,ZSCAN18
gene_set_query	1223	ZNF879	0.476	ARCHS4 Coexpression,0.476	ERGIC1
gene_set_query	1224	ZKSCAN8	0.4779	GTEx Coexpression,0.4779	KLF9,ARHGAP6
gene_set_query	1225	ZNF222	0.4786	Enrichr Queries,0.4786	SOCS2,CITED2,GDF15,ZNF229,ZNF613,IRS2,ZNF502,CLU,ZSCAN18,CLGN
gene_set_query	1226	ZNF221	0.4793	Enrichr Queries,0.4793	AKAP12,GHR,ZNF649,ZNF229,ZNF613,ZNF502,IQGAP2,ZNF577,STEAP2,IGF1R
gene_set_query	1227	ZNF568	0.4801	Enrichr Queries,0.4801	GHR,ZNF649,ZNF229,TRIM36,IRS2,ZNF502,IQGAP2,ZNF577,ZNF135,ZSCAN18
gene_set_query	1228	TOPORS	0.4803	ARCHS4 Coexpression,0.4803	AMD1
gene_set_query	1229	ZKSCAN4	0.4808	Enrichr Queries,0.4808	SOCS2,NFIX,CITED2,GDF15,MYC,KLF9,PMEPA1,ADRB2,GC,DHRS3
gene_set_query	1230	ANKZF1	0.4816	ARCHS4 Coexpression,0.4816	DOCK8
gene_set_query	1231	ARNTL2	0.4816	GTEx Coexpression,0.4816	AQP3,RHOD
gene_set_query	1232	SP2	0.4822	Enrichr Queries,0.4822	NFIX,CCND1,CITED2,GDF15,MYC,FASN,KLF9,NEDD4L,IRS2,IGF1R
gene_set_query	1233	ZNF836	0.4829	Enrichr Queries,0.4829	THRB,CITED2,GDF15,ZNF649,TP53INP1,ZNF613,RHOU,IRS2,ZNF577,DHRS3
gene_set_query	1234	ZNF7	0.4843	Enrichr Queries,0.4843	AKAP12,CCND1,CITED2,GDF15,MYC,FASN,TP53INP1,NEDD4L,PMEPA1,IRS2
gene_set_query	1235	DMRTA2	0.4848	GTEx Coexpression,0.4848	AQP3,RHOD
gene_set_query	1236	ZNF846	0.485	Enrichr Queries,0.485	ARRDC4,AKAP12,CITED2,GDF15,TP53INP1,KLF9,GC,CLU,SMPDL3A,DHRS3
gene_set_query	1237	MSC	0.4858	Enrichr Queries,0.4858	AKAP12,SPON2,MME,CCND1,IL1R1,GDF15,MYC,KLF9,PMEPA1,TBX3
gene_set_query	1238	CAMTA2	0.4877	ARCHS4 Coexpression,0.4877	NFIX
gene_set_query	1239	NFYA	0.4879	Enrichr Queries,0.4879	AKAP12,NFIX,CCND1,CITED2,GDF15,IRS1,MYC,PMEPA1,IRS2,IGF1R
gene_set_query	1240	ZIM2	0.4897	GTEx Coexpression,0.4897	TRIM36
gene_set_query	1241	SKI	0.4902	ARCHS4 Coexpression,0.4902	NFIX
gene_set_query	1242	ZNF479	0.4904	GTEx Coexpression,0.4904	TRIM36
gene_set_query	1243	ZNF253	0.4908	ARCHS4 Coexpression,0.4908	ERGIC1
gene_set_query	1244	CENPB	0.4914	ARCHS4 Coexpression,0.4914	ERGIC1
gene_set_query	1245	MBD1	0.4915	Enrichr Queries,0.4915	AKAP12,CCND1,GDF15,MYC,FASN,ZBTB16,KLF9,NEDD4L,IRS2,FKBP5
gene_set_query	1246	IRF3	0.4915	ENCODE ChIP-seq,0.4915	ARRDC4,ALDH6A1,CREB3L4,H2AFJ,ABHD2,IDH1,PPM1K
gene_set_query	1247	ZNF318	0.4916	ReMap ChIP-seq,0.4916	SOCS2,SLC25A37,NFIX,MME,IL1R1,GDF15,ZG16B,KLF9,ELL2,GCAT,DHRS3
gene_set_query	1248	ZBTB43	0.4916	GTEx Coexpression,0.4916	MYBPC1
gene_set_query	1249	ZNF586	0.492	ARCHS4 Coexpression,0.492	ITGB5
gene_set_query	1250	THAP9	0.4926	ARCHS4 Coexpression,0.4926	ERGIC1
gene_set_query	1251	MYNN	0.4932	ARCHS4 Coexpression,0.4932	ERGIC1
gene_set_query	1252	JRKL	0.4935	GTEx Coexpression,0.4935	PRR16
gene_set_query	1253	HIC2	0.4936	Enrichr Queries,0.4936	AKAP12,NFIX,CCND1,CITED2,GDF15,MYC,FASN,KLF9,IRS2,IGF1R
gene_set_query	1254	ZNF487	0.4941	GTEx Coexpression,0.4941	TRIM36
gene_set_query	1255	THAP1	0.4949	ReMap ChIP-seq,0.4949	GAMT,NPDC1,CCND1,FASN,ZBTB16,DCXR,GNG7,NME3,OPLAH,FGFRL1,TRPM4
gene_set_query	1256	SP4	0.495	Enrichr Queries,0.495	THRB,CCND1,CITED2,MYC,KLF9,NEDD4L,IRS2,PAG1,IGF1R,FKBP5
gene_set_query	1257	FIZ1	0.4953	GTEx Coexpression,0.4953	ATP6V0E2
gene_set_query	1258	SCRT1	0.4957	ARCHS4 Coexpression,0.4957	CTNND2
gene_set_query	1259	ZNF182	0.496	GTEx Coexpression,0.496	SLC25A27
gene_set_query	1260	ZNF99	0.4963	ARCHS4 Coexpression,0.4963	CYP4F8
gene_set_query	1261	RBCK1	0.4966	GTEx Coexpression,0.4966	NME3
gene_set_query	1262	ZNF678	0.4969	ARCHS4 Coexpression,0.4969	GULP1
gene_set_query	1263	DRGX	0.4972	GTEx Coexpression,0.4972	GRIN3A
gene_set_query	1264	ZNF426	0.4979	Enrichr Queries,0.4979	AKAP12,SOCS2,CCND1,CITED2,GDF15,MYC,TP53INP1,IRS2,PDLIM5,IGF1R
gene_set_query	1265	ZNF708	0.4988	ARCHS4 Coexpression,0.4988	TRIM36
gene_set_query	1266	TFEB	0.4993	Enrichr Queries,0.4993	NFIX,CCND1,GDF15,MYC,ZBTB16,KLF9,PMEPA1,IRS2,DHRS3,FKBP5
gene_set_query	1267	ZNF107	0.4994	ARCHS4 Coexpression,0.4994	ITGB5
gene_set_query	1268	SOX30	0.5003	GTEx Coexpression,0.5003	TRIM36
gene_set_query	1269	BARHL1	0.5006	ARCHS4 Coexpression,0.5006	CTNND2
gene_set_query	1270	ZNF148	0.5009	GTEx Coexpression,0.5009	LATS2
gene_set_query	1271	RBSN	0.5016	GTEx Coexpression,0.5016	CTNND2
gene_set_query	1272	IRF2	0.5021	Enrichr Queries,0.5021	SOCS2,CCND1,CITED2,MYC,FASN,KLF9,IRS2,IQGAP2,DHRS3,FKBP5
gene_set_query	1273	PBX2	0.5028	Enrichr Queries,0.5028	NFIX,CCND1,CITED2,MYC,FASN,IRS2,IQGAP2,GC,DHRS3,IGF1R
gene_set_query	1274	ZNF410	0.5037	ARCHS4 Coexpression,0.5037	NFIX
gene_set_query	1275	SPZ1	0.504	GTEx Coexpression,0.504	TRIM36
gene_set_query	1276	ZNF44	0.5043	Enrichr Queries,0.5043	ARRDC4,CITED2,GDF15,TP53INP1,KLF9,NEDD4L,IQGAP2,ZNF577,ZSCAN18,IGF1R
gene_set_query	1277	ZNF681	0.505	Enrichr Queries,0.505	ARRDC4,AKAP12,SOCS2,CITED2,DOCK8,ZNF649,TP53INP1,IQGAP2,ZNF577,ZSCAN18
gene_set_query	1278	AKAP8L	0.5053	GTEx Coexpression,0.5053	ZNF135
gene_set_query	1279	ZNF81	0.5055	ARCHS4 Coexpression,0.5055	DOCK8
gene_set_query	1280	ADNP2	0.5057	Enrichr Queries,0.5057	AKAP12,SOCS2,CITED2,GDF15,MYC,KLF9,NEDD4L,IRS2,ELL2,IGF1R
gene_set_query	1281	ZNF136	0.5059	GTEx Coexpression,0.5059	ZNF649
gene_set_query	1282	ZNF85	0.5068	ARCHS4 Coexpression,0.5068	ERGIC1
gene_set_query	1283	ZNF669	0.5074	ARCHS4 Coexpression,0.5074	ERGIC1
gene_set_query	1284	ZNF264	0.5078	Enrichr Queries,0.5078	AKAP12,CCND1,GDF15,MYC,ABHD2,TP53INP1,IRS2,PDLIM5,PAG1,IGF1R
gene_set_query	1285	ZNF672	0.5084	GTEx Coexpression,0.5084	PEBP4
gene_set_query	1286	TERB1	0.5086	ARCHS4 Coexpression,0.5086	CYP4F8
gene_set_query	1287	BHLHA9	0.5096	GTEx Coexpression,0.5096	GRIN3A
gene_set_query	1288	MNT	0.51	Enrichr Queries,0.51	NFIX,CCND1,CITED2,GDF15,MYC,FASN,KLF9,IRS2,DHRS3,IGF1R
gene_set_query	1289	CENPT	0.5103	GTEx Coexpression,0.5103	ZNF577
gene_set_query	1290	ZNF500	0.5123	ARCHS4 Coexpression,0.5123	CYP4F8
gene_set_query	1291	TBPL1	0.5128	GTEx Coexpression,0.5128	TRIM36
gene_set_query	1292	IKZF5	0.5135	ARCHS4 Coexpression,0.5135	ITGB5
gene_set_query	1293	ZNF547	0.5135	Enrichr Queries,0.5135	CITED2,GDF15,MYC,TP53INP1,NEDD4L,ZNF613,ZNF577,CLU,DHRS3,ZSCAN18
gene_set_query	1294	ZNF555	0.515	Enrichr Queries,0.515	ARRDC4,SOCS2,CITED2,GDF15,MYC,GNG7,TP53INP1,ZNF613,ELL2,IGF1R
gene_set_query	1295	SOHLH2	0.5152	GTEx Coexpression,0.5152	TRIM36
gene_set_query	1296	PRDM15	0.5164	Enrichr Queries,0.5164	ABCC4,NFIX,CITED2,FASN,ZBTB16,NEDD4L,PMEPA1,IRS2,IGF1R,FKBP5
gene_set_query	1297	ZNF696	0.5178	Enrichr Queries,0.5178	NFIX,CCND1,CITED2,GDF15,MYC,FASN,KLF9,PMEPA1,IRS2,DHRS3
gene_set_query	1298	ZNF749	0.5178	ARCHS4 Coexpression,0.5178	GCAT
gene_set_query	1299	ZNF567	0.5184	GTEx Coexpression,0.5184	ZNF502
gene_set_query	1300	NFATC3	0.5184	ARCHS4 Coexpression,0.5184	DOCK8
gene_set_query	1301	ZSCAN20	0.5185	Enrichr Queries,0.5185	AKAP12,NFIX,CCND1,IRS1,ABHD2,NEDD4L,RHOU,DHRS3,IGF1R,FKBP5
gene_set_query	1302	ZNF736	0.519	GTEx Coexpression,0.519	ZNF577
gene_set_query	1303	CAMTA1	0.519	ARCHS4 Coexpression,0.519	CTNND2
gene_set_query	1304	GLYR1	0.5203	ARCHS4 Coexpression,0.5203	ERGIC1
gene_set_query	1305	ZNF286B	0.5209	ARCHS4 Coexpression,0.5209	FAM110B
gene_set_query	1306	KLF17	0.5221	ARCHS4 Coexpression,0.5221	AMD1
gene_set_query	1307	IKZF3	0.5233	ARCHS4 Coexpression,0.5233	DOCK8
gene_set_query	1308	FOXB1	0.5235	Enrichr Queries,0.5235	FOXA1,DLX1,DLX2,CUX2,CCND1,ZBTB16,IRX3,GATA2,TBX3
gene_set_query	1309	SRF	0.5252	GTEx Coexpression,0.5252	RAMP1
gene_set_query	1310	STAT1	0.5254	ENCODE ChIP-seq,0.5254	ARRDC4,GDF15,HPN
gene_set_query	1311	ZNF385C	0.5258	ARCHS4 Coexpression,0.5258	CYP4F8
gene_set_query	1312	ZFY	0.5264	Enrichr Queries,0.5264	ARRDC4,ALDH1A3,MME,HPGD,CITED2,PMEPA1,RPS4Y1,CLU,CLGN
gene_set_query	1313	ZNF679	0.5271	GTEx Coexpression,0.5271	TRIM36
gene_set_query	1314	NEUROG1	0.5278	Enrichr Queries,0.5278	FOXA1,DLX1,DLX2,NFIX,CCND1,ZBTB16,IRX3,GATA2,TBX3
gene_set_query	1315	ZNF705B	0.5296	GTEx Coexpression,0.5296	TRIM36
gene_set_query	1316	ZNF735	0.5301	ARCHS4 Coexpression,0.5301	AMD1
gene_set_query	1317	ZNF625	0.5307	ARCHS4 Coexpression,0.5307	ERGIC1
gene_set_query	1318	ZNF705G	0.5308	GTEx Coexpression,0.5308	TRIM36
gene_set_query	1319	ZFP91	0.5314	GTEx Coexpression,0.5314	TRIM36
gene_set_query	1320	THAP3	0.532	GTEx Coexpression,0.532	MYO6
gene_set_query	1321	LHX1	0.5321	Enrichr Queries,0.5321	FOXA1,DLX1,DLX2,CUX2,CCND1,MYC,IRX3,GATA2,TBX3
gene_set_query	1322	ZNF26	0.5326	ARCHS4 Coexpression,0.5326	PPM1K
gene_set_query	1323	ZNF43	0.5335	Enrichr Queries,0.5335	SOCS2,MME,CCND1,MYC,ZBTB16,NEDD4L,IQGAP2,CLU,ZSCAN18
gene_set_query	1324	SPIB	0.5338	ARCHS4 Coexpression,0.5338	ITGB5
gene_set_query	1325	MYPOP	0.5339	GTEx Coexpression,0.5339	CGREF1
gene_set_query	1326	HSF5	0.5345	GTEx Coexpression,0.5345	TRIM36
gene_set_query	1327	ZNF232	0.5356	Enrichr Queries,0.5356	SOCS2,CUX2,CCND1,GDF15,MYC,IRS2,STEAP1,DHRS3,PDE9A
gene_set_query	1328	ZNF780A	0.5356	ARCHS4 Coexpression,0.5356	ACADSB
gene_set_query	1329	AHCTF1	0.5358	GTEx Coexpression,0.5358	H2AFJ
gene_set_query	1330	ZBTB37	0.5362	ARCHS4 Coexpression,0.5362	DOCK8
gene_set_query	1331	EMX1	0.5363	Enrichr Queries,0.5363	DLX1,ALDH1A3,DLX2,NFIX,CUX2,GDF15,ZBTB16,IRX3,GATA2
gene_set_query	1332	NEUROG2	0.5369	ARCHS4 Coexpression,0.5369	FBXL7
gene_set_query	1333	ZNF550	0.5381	ARCHS4 Coexpression,0.5381	ITGB5
gene_set_query	1334	MEF2C	0.5383	GTEx Coexpression,0.5383	MYBPC1
gene_set_query	1335	ZNF766	0.5387	ReMap ChIP-seq,0.5387	GAMT,NPDC1,SPON2,SLC25A37,ABHD2,OPLAH,MSMB
gene_set_query	1336	DMRTB1	0.5392	Enrichr Queries,0.5392	FOXA1,ALDH1A3,CUX2,MYC,ZBTB16,GREB1,PMEPA1,BMPR1B,TBX3
gene_set_query	1337	NRF1	0.5418	ARCHS4 Coexpression,0.5418	DOCK8
gene_set_query	1338	GSC2	0.5426	GTEx Coexpression,0.5426	ASB9
gene_set_query	1339	SP3	0.543	ARCHS4 Coexpression,0.543	DOCK8
gene_set_query	1340	ONECUT3	0.5434	Enrichr Queries,0.5434	FOXA1,ALDH1A3,DLX2,NFIX,CUX2,GDF15,IRX3,GATA2,TBX3
gene_set_query	1341	LHX3	0.5451	GTEx Coexpression,0.5451	SLC25A27
gene_set_query	1342	HINFP	0.5455	ReMap ChIP-seq,0.5455	MCCC2,FOXA1,MESP1,CPNE4,GRTP1,GDF15,ZNF649,HPN,OPLAH,ELL2
gene_set_query	1343	SCML4	0.5461	ARCHS4 Coexpression,0.5461	DOCK8
gene_set_query	1344	DBX1	0.5464	GTEx Coexpression,0.5464	CCDC74B
gene_set_query	1345	ATF2	0.5467	ARCHS4 Coexpression,0.5467	TRIM36
gene_set_query	1346	PRR12	0.5479	ARCHS4 Coexpression,0.5479	FASN
gene_set_query	1347	ZNF507	0.5482	GTEx Coexpression,0.5482	ZNF502
gene_set_query	1348	ZNF354B	0.5484	Enrichr Queries,0.5484	ARRDC4,SOCS2,CCND1,CITED2,GDF15,IRS1,MYC,ZBTB16,PPM1K
gene_set_query	1349	SP100	0.5485	ARCHS4 Coexpression,0.5485	DOCK8
gene_set_query	1350	IRF9	0.5488	ReMap ChIP-seq,0.5488	SLC25A37,NFIX,THRB,IL1R1,GDF15,ABHD2,SLC43A1,OPLAH,FGFRL1,GCAT
gene_set_query	1351	ZNF506	0.5488	GTEx Coexpression,0.5488	ZNF135
gene_set_query	1352	RHOXF2B	0.5501	GTEx Coexpression,0.5501	ASB9
gene_set_query	1353	MAZ	0.5508	ENCODE ChIP-seq,0.5508	NPDC1,FOXA1,CHRNA2,ZG16B,RHOD,HOXA13,GCAT,SOCS2,AZGP1,DHRS7,CCND1,TP53TG1,ZNF649,TCEA3,AGTR1,CRYL1,ZNF613,PDE9A
gene_set_query	1354	SP110	0.5516	ARCHS4 Coexpression,0.5516	DOCK8
gene_set_query	1355	STAT2	0.5522	ReMap ChIP-seq,0.5522	ARRDC4,SLC25A37,CREB3L4,IL1R1,GDF15,GREB1,NEDD4L,ATP6V0E2,PLA1A,SPDEF
gene_set_query	1356	ZNF394	0.5528	ARCHS4 Coexpression,0.5528	DOCK8
gene_set_query	1357	ZNF215	0.5534	ARCHS4 Coexpression,0.5534	GRTP1
gene_set_query	1358	ZNF202	0.5538	GTEx Coexpression,0.5538	ZNF502
gene_set_query	1359	ZNF12	0.5559	ARCHS4 Coexpression,0.5559	ZNF577
gene_set_query	1360	ZNF419	0.5563	GTEx Coexpression,0.5563	SLC25A27
gene_set_query	1361	TPRX1	0.5565	ARCHS4 Coexpression,0.5565	AMD1
gene_set_query	1362	ZNF830	0.5571	ARCHS4 Coexpression,0.5571	ERGIC1
gene_set_query	1363	ZNF451	0.5576	GTEx Coexpression,0.5576	TRIM36
gene_set_query	1364	THAP10	0.5584	Enrichr Queries,0.5584	SOCS2,ALDH1A3,CCND1,CITED2,GDF15,MYC,PMEPA1,IRS2,CLGN
gene_set_query	1365	RFX1	0.5588	GTEx Coexpression,0.5588	CCDC74B
gene_set_query	1366	TERF2	0.5589	ReMap ChIP-seq,0.5589	SPON2,PPP3CA,NFIX,NUDT8,CREB3L4,HOMER2,PEBP4,IQGAP2,TMED6,GNMT
gene_set_query	1367	ZNF446	0.56	GTEx Coexpression,0.56	ZNF502
gene_set_query	1368	ZNF276	0.5602	ARCHS4 Coexpression,0.5602	DOCK8
gene_set_query	1369	ZNF461	0.5605	Enrichr Queries,0.5605	ARRDC4,CITED2,GDF15,ZNF649,ZNF229,ZNF613,ZNF502,ZNF577,ZSCAN18
gene_set_query	1370	ZNF576	0.5613	GTEx Coexpression,0.5613	ATP6V0E2
gene_set_query	1371	ZNF570	0.5634	Enrichr Queries,0.5634	PTGFR,GDF15,ZNF649,ZNF613,STEAP2,FBXL7,DHRS3,PDE9A,ZSCAN18
gene_set_query	1372	ZNF397	0.5651	ARCHS4 Coexpression,0.5651	ARHGEF26
gene_set_query	1373	TFCP2	0.5657	GTEx Coexpression,0.5657	H2AFJ
gene_set_query	1374	ZNF619	0.5657	ARCHS4 Coexpression,0.5657	CYP4F8
gene_set_query	1375	ZNF675	0.5669	GTEx Coexpression,0.5669	CWH43
gene_set_query	1376	ZBTB33	0.5676	ARCHS4 Coexpression,0.5676	DLX2
gene_set_query	1377	FOXR1	0.5706	ARCHS4 Coexpression,0.5706	AMD1
gene_set_query	1378	ZNF729	0.5713	ARCHS4 Coexpression,0.5713	BEND4
gene_set_query	1379	ZSCAN5B	0.5719	ARCHS4 Coexpression,0.5719	AMD1
gene_set_query	1380	ZNF174	0.5741	Enrichr Queries,0.5741	SLC22A23,SOCS2,GDF15,MYC,DOCK8,NEDD4L,GC,PDLIM5,ELL2
gene_set_query	1381	TBX21	0.5743	ARCHS4 Coexpression,0.5743	DOCK8
gene_set_query	1382	TBX19	0.5756	GTEx Coexpression,0.5756	NME3
gene_set_query	1383	NKX11	0.5762	ARCHS4 Coexpression,0.5762	KLF15
gene_set_query	1384	ZNF525	0.5762	GTEx Coexpression,0.5762	BEND4
gene_set_query	1385	MYSM1	0.5768	ARCHS4 Coexpression,0.5768	ACACA
gene_set_query	1386	ZNF831	0.578	ARCHS4 Coexpression,0.578	DOCK8
gene_set_query	1387	ZSCAN31	0.5786	ARCHS4 Coexpression,0.5786	TTR
gene_set_query	1388	PHF1	0.5787	GTEx Coexpression,0.5787	CCDC74B
gene_set_query	1389	DDIT3	0.5798	Enrichr Queries,0.5798	SOCS2,CCND1,CITED2,GDF15,MYC,KLF9,IRS2,CLU,DHRS3
gene_set_query	1390	POU2AF1	0.5805	ARCHS4 Coexpression,0.5805	HOXB13
gene_set_query	1391	SP140	0.5817	ARCHS4 Coexpression,0.5817	DOCK8
gene_set_query	1392	CHAMP1	0.5818	GTEx Coexpression,0.5818	MME
gene_set_query	1393	PCGF6	0.5823	ARCHS4 Coexpression,0.5823	ERGIC1
gene_set_query	1394	JRK	0.5825	GTEx Coexpression,0.5825	ZNF502
gene_set_query	1395	ZNF79	0.5833	Enrichr Queries,0.5833	ARRDC4,NFIX,CITED2,GDF15,MYC,FASN,ABHD2,TP53INP1,NEDD4L
gene_set_query	1396	ZNF160	0.5849	GTEx Coexpression,0.5849	ZNF577
gene_set_query	1397	REL	0.586	ARCHS4 Coexpression,0.586	DOCK8
gene_set_query	1398	BHLHE22	0.5866	ARCHS4 Coexpression,0.5866	CTNND2
gene_set_query	1399	ZNF41	0.5868	GTEx Coexpression,0.5868	PDLIM5
gene_set_query	1400	PHF20	0.5881	GTEx Coexpression,0.5881	MYBPC1
gene_set_query	1401	LEUTX	0.5897	ARCHS4 Coexpression,0.5897	AMD1
gene_set_query	1402	GATAD2A	0.5899	GTEx Coexpression,0.5899	CYP2U1
gene_set_query	1403	IRF8	0.5915	Literature ChIP-seq,0.5915	ABHD2,IRX3,MYO6,PPM1K
gene_set_query	1404	MTERF3	0.5915	ARCHS4 Coexpression,0.5915	IDH1
gene_set_query	1405	PRDM10	0.5933	Enrichr Queries,0.5933	IRS1,MYC,FASN,ABHD2,KLF9,NEDD4L,IRS2,IQGAP2,IGF1R
gene_set_query	1406	SP140L	0.5937	GTEx Coexpression,0.5937	DOCK8
gene_set_query	1407	TFAP2E	0.5947	Enrichr Queries,0.5947	SPON2,DLX1,DLX2,NFIX,GDF15,IRX3,TCEA3,GATA2,DHRS3
gene_set_query	1408	FAM170A	0.5964	ARCHS4 Coexpression,0.5964	DHRS7
gene_set_query	1409	ZNF609	0.5986	GTEx Coexpression,0.5986	CCDC74B
gene_set_query	1410	ZNF776	0.5989	ARCHS4 Coexpression,0.5989	ZNF577
gene_set_query	1411	POU2F2	0.6005	GTEx Coexpression,0.6005	DOCK8
gene_set_query	1412	CSRNP2	0.6007	ARCHS4 Coexpression,0.6007	CTNND2
gene_set_query	1413	CEBPE	0.6011	GTEx Coexpression,0.6011	SLC25A37
gene_set_query	1414	CSRNP1	0.6026	ARCHS4 Coexpression,0.6026	DOCK8
gene_set_query	1415	THAP5	0.603	GTEx Coexpression,0.603	CWH43
gene_set_query	1416	ZBED4	0.6033	Enrichr Queries,0.6033	CCND1,CITED2,GDF15,MYC,FASN,KLF9,NEDD4L,IRS2,FKBP5
gene_set_query	1417	NFAT5	0.6038	ARCHS4 Coexpression,0.6038	TBX3
gene_set_query	1418	HSFY2	0.6044	ARCHS4 Coexpression,0.6044	MESP1
gene_set_query	1419	BRF2	0.6049	GTEx Coexpression,0.6049	MYBPC1
gene_set_query	1420	MEF2B	0.6057	ARCHS4 Coexpression,0.6057	ZNF385B
gene_set_query	1421	ZSCAN30	0.6061	GTEx Coexpression,0.6061	SLC25A27
gene_set_query	1422	ZNF324	0.6061	Enrichr Queries,0.6061	NFIX,CCND1,CITED2,GDF15,MYC,FASN,PMEPA1,IRS2,DHRS3
gene_set_query	1423	ZNF598	0.6067	GTEx Coexpression,0.6067	MYC
gene_set_query	1424	GFI1	0.6068	Enrichr Queries,0.6068	SOCS2,CCND1,GDF15,MYC,ZBTB16,IRS2,ADRB2,GATA2,PLA2G7
gene_set_query	1425	PRDM2	0.6073	GTEx Coexpression,0.6073	ABHD2
gene_set_query	1426	ZNF813	0.608	GTEx Coexpression,0.608	ZNF613
gene_set_query	1427	ZNF146	0.6081	ARCHS4 Coexpression,0.6081	IDH1
gene_set_query	1428	GATAD2B	0.6086	GTEx Coexpression,0.6086	PAG1
gene_set_query	1429	STAT6	0.6087	ARCHS4 Coexpression,0.6087	DOCK8
gene_set_query	1430	ZNF80	0.6092	GTEx Coexpression,0.6092	DOCK8
gene_set_query	1431	DUX4	0.6094	ReMap ChIP-seq,0.6094	SLC22A23,TMEFF2,HPGD,SLC2A12,PRR16,BMPR1B,PDLIM5,ELL2,GULP1
gene_set_query	1432	ZBTB17	0.6097	Enrichr Queries,0.6097	CCND1,CITED2,GDF15,MYC,FASN,IRS2,GC,DHRS3,FKBP5
gene_set_query	1433	KMT2B	0.6128	ReMap ChIP-seq,0.6128	NUDT8,CREB3L4,ZNF649,GNG7,ZNF613,ZNF502,ZNF577,OPLAH,TMED6
gene_set_query	1434	DNTTIP1	0.6129	GTEx Coexpression,0.6129	BMX
gene_set_query	1435	ZNF414	0.613	ARCHS4 Coexpression,0.613	BMPR1B
gene_set_query	1436	SRCAP	0.6136	ARCHS4 Coexpression,0.6136	FASN
gene_set_query	1437	SIX6	0.614	Enrichr Queries,0.614	FOXA1,HOXA10,DLX1,DLX2,GDF15,ZBTB16,IRX3,TBX3
gene_set_query	1438	ZNF566	0.6142	GTEx Coexpression,0.6142	NFIX
gene_set_query	1439	ZNF324B	0.6149	ARCHS4 Coexpression,0.6149	SCUBE2
gene_set_query	1440	ZBTB32	0.6155	ARCHS4 Coexpression,0.6155	PLA1A
gene_set_query	1441	VSX1	0.6175	Enrichr Queries,0.6175	FOXA1,DLX1,NFIX,CUX2,GDF15,IRX3,GATA2,TBX3
gene_set_query	1442	ZNF101	0.6179	GTEx Coexpression,0.6179	DOCK8
gene_set_query	1443	BATF3	0.6179	ARCHS4 Coexpression,0.6179	GREB1
gene_set_query	1444	LHX5	0.6189	Enrichr Queries,0.6189	FOXA1,DLX1,DLX2,CUX2,ZBTB16,IRX3,GATA2,TBX3
gene_set_query	1445	ZNF764	0.6204	ARCHS4 Coexpression,0.6204	ITGB5
gene_set_query	1446	ZKSCAN2	0.621	ARCHS4 Coexpression,0.621	TRIM36
gene_set_query	1447	ARID5A	0.6229	GTEx Coexpression,0.6229	BMX
gene_set_query	1448	RBAK	0.6248	GTEx Coexpression,0.6248	ZNF502
gene_set_query	1449	TFE3	0.6253	ARCHS4 Coexpression,0.6253	ERGIC1
gene_set_query	1450	PURB	0.6259	ARCHS4 Coexpression,0.6259	ERGIC1
gene_set_query	1451	ZNF485	0.6289	Enrichr Queries,0.6289	SOCS2,CCND1,CITED2,GDF15,MYC,ZNF649,IRS2,STEAP1
gene_set_query	1452	CREBZF	0.6296	ARCHS4 Coexpression,0.6296	ACACA
gene_set_query	1453	SNAPC4	0.6296	ReMap ChIP-seq,0.6296	CYP39A1,SCUBE2,SLC25A27,MESP1,CREB3L4,USP54,IDH1,RHOU,GNMT
gene_set_query	1454	NFYC	0.6302	ARCHS4 Coexpression,0.6302	DOCK8
gene_set_query	1455	CENPS	0.6304	GTEx Coexpression,0.6304	CCDC74B
gene_set_query	1456	ZFP69	0.6339	ARCHS4 Coexpression,0.6339	TCEA3
gene_set_query	1457	CPXCR1	0.6345	ARCHS4 Coexpression,0.6345	HOXB13
gene_set_query	1458	TIGD3	0.6357	ARCHS4 Coexpression,0.6357	SLC25A37
gene_set_query	1459	RELB	0.6364	ReMap ChIP-seq,0.6364	NPDC1,DLX1,DLX2,CUX2,NUDT8,IL1R1,ANG,ELL2,PLA1A
gene_set_query	1460	ZNF786	0.6372	GTEx Coexpression,0.6372	HERC3
gene_set_query	1461	ZNF285	0.6378	GTEx Coexpression,0.6378	ATP6V0E2
gene_set_query	1462	ZNF493	0.6397	GTEx Coexpression,0.6397	SLC25A27
gene_set_query	1463	MYBL1	0.6403	Enrichr Queries,0.6403	AKAP12,SOCS2,CCND1,GDF15,MYC,PMEPA1,IRS2,ADRB2
gene_set_query	1464	ZNF789	0.6453	Enrichr Queries,0.6453	AKAP12,SOCS2,CITED2,GDF15,MYC,FASN,NEDD4L,PMEPA1
gene_set_query	1465	NFKB2	0.6465	ReMap ChIP-seq,0.6465	ALDH6A1,DLX2,NFIX,IL1R1,H2AFJ,ANG,PPM1K,ELL2,PLA1A
gene_set_query	1466	E2F8	0.6472	GTEx Coexpression,0.6472	TCEA3
gene_set_query	1467	ZNF282	0.648	ARCHS4 Coexpression,0.648	FASN
gene_set_query	1468	ZNF805	0.6481	Enrichr Queries,0.6481	ARRDC4,AKAP12,CCND1,GDF15,MYC,TP53INP1,IRS2,IGF1R
gene_set_query	1469	ZNF283	0.6496	Enrichr Queries,0.6496	ARRDC4,CCND1,CITED2,GDF15,MYC,ZNF649,ZNF229,FKBP5
gene_set_query	1470	GTF2I	0.6499	ARCHS4 Coexpression,0.6499	ACACA
gene_set_query	1471	MTF1	0.6505	ARCHS4 Coexpression,0.6505	PLA2G7
gene_set_query	1472	ZNF385A	0.6515	GTEx Coexpression,0.6515	CWH43
gene_set_query	1473	SON	0.6523	ARCHS4 Coexpression,0.6523	NCAM2
gene_set_query	1474	ZNF408	0.6536	ARCHS4 Coexpression,0.6536	CITED2
gene_set_query	1475	E2F2	0.654	GTEx Coexpression,0.654	SLC25A37
gene_set_query	1476	UBP1	0.656	ARCHS4 Coexpression,0.656	ERGIC1
gene_set_query	1477	ZNF213	0.6571	GTEx Coexpression,0.6571	TRIM36
gene_set_query	1478	ZNF674	0.6577	GTEx Coexpression,0.6577	ZNF613
gene_set_query	1479	SNAI3	0.6588	Enrichr Queries,0.6588	SOCS2,CCND1,GDF15,MYC,FASN,ADRB2,GC,CLU
gene_set_query	1480	ZNF396	0.661	Enrichr Queries,0.661	SLC25A27,C5,DLX2,GDF15,TP53INP1,RHOU,KLF15,CLGN
gene_set_query	1481	ZNF480	0.6617	Enrichr Queries,0.6617	CCND1,GDF15,MYC,AMD1,TP53INP1,ZNF613,IQGAP2,PAG1
gene_set_query	1482	ZNF510	0.6628	ARCHS4 Coexpression,0.6628	ACACA
gene_set_query	1483	ZNF292	0.6634	ARCHS4 Coexpression,0.6634	ITGB5
gene_set_query	1484	BHLHE23	0.664	GTEx Coexpression,0.664	BEND4
gene_set_query	1485	ZNF383	0.6645	Enrichr Queries,0.6645	CITED2,GDF15,MYC,TP53INP1,ZNF613,IRS2,ZNF577,ZSCAN18
gene_set_query	1486	ZNF234	0.6652	Enrichr Queries,0.6652	GDF15,MYC,ZNF649,TP53INP1,ZNF229,ZNF613,ZNF577,DHRS3
gene_set_query	1487	ZNF37A	0.6665	GTEx Coexpression,0.6665	SLC25A27
gene_set_query	1488	GMEB2	0.6674	Enrichr Queries,0.6674	CCND1,CITED2,GDF15,MYC,FASN,KLF9,IRS2,GC
gene_set_query	1489	NKX28	0.6696	GTEx Coexpression,0.6696	ASB9
gene_set_query	1490	NFKB1	0.67	ReMap ChIP-seq,0.67	GAMT,NPDC1,DLX1,DLX2,NFIX,CREB3L4,IL1R1,DCXR,ANG
gene_set_query	1491	SNAPC5	0.6708	ARCHS4 Coexpression,0.6708	ERGIC1
gene_set_query	1492	TMF1	0.672	ARCHS4 Coexpression,0.672	ELL2
gene_set_query	1493	AKNA	0.6721	GTEx Coexpression,0.6721	DOCK8
gene_set_query	1494	ZNF430	0.6745	GTEx Coexpression,0.6745	CWH43
gene_set_query	1495	ZNF230	0.6752	GTEx Coexpression,0.6752	BMX
gene_set_query	1496	ELF4	0.6763	ARCHS4 Coexpression,0.6763	DOCK8
gene_set_query	1497	ZNF200	0.6774	Enrichr Queries,0.6774	CITED2,GDF15,MYC,FASN,AMD1,IRS2,ACSL3,IGF1R
gene_set_query	1498	ZNF445	0.6781	Enrichr Queries,0.6781	NFIX,CCND1,FASN,ABHD2,TP53INP1,NEDD4L,IRS2,IGF1R
gene_set_query	1499	AHRR	0.6794	ARCHS4 Coexpression,0.6794	PLA2G7
gene_set_query	1500	PLAGL2	0.6795	Enrichr Queries,0.6795	CCND1,CITED2,GDF15,MYC,FASN,IRS2,ELL2,IGF1R
gene_set_query	1501	ZNF546	0.6802	Enrichr Queries,0.6802	AKAP12,SOCS2,CITED2,GDF15,TP53INP1,MBOAT2,IGF1R,FKBP5
gene_set_query	1502	KIN	0.6809	Enrichr Queries,0.6809	SOCS2,CCND1,CITED2,GDF15,MYC,IRS2,IQGAP2,FKBP5
gene_set_query	1503	THAP11	0.683	Enrichr Queries,0.683	SOCS2,CCND1,CITED2,GDF15,MYC,FASN,KLF9,IRS2
gene_set_query	1504	ZNF473	0.6837	ARCHS4 Coexpression,0.6837	MSMB
gene_set_query	1505	ZNF527	0.6851	GTEx Coexpression,0.6851	ZNF502
gene_set_query	1506	ZNF891	0.6864	GTEx Coexpression,0.6864	LATS2
gene_set_query	1507	ZNF765	0.6882	GTEx Coexpression,0.6882	ATP6V0E2
gene_set_query	1508	ZNF549	0.6895	Enrichr Queries,0.6895	CCND1,GDF15,MYC,FASN,ZNF577,DHRS3,ZSCAN18
gene_set_query	1509	CBLL2	0.691	ARCHS4 Coexpression,0.691	HSBP1L1
gene_set_query	1510	VENTX	0.692	GTEx Coexpression,0.692	BMX
gene_set_query	1511	ZNF787	0.6923	ARCHS4 Coexpression,0.6923	ERGIC1
gene_set_query	1512	ZSCAN5C	0.6929	ARCHS4 Coexpression,0.6929	MYC
gene_set_query	1513	ZNF66	0.6947	ARCHS4 Coexpression,0.6947	TRPM4
gene_set_query	1514	ZNF687	0.6972	ARCHS4 Coexpression,0.6972	ERGIC1
gene_set_query	1515	STAT4	0.7015	ARCHS4 Coexpression,0.7015	PAG1
gene_set_query	1516	ZNF440	0.7026	GTEx Coexpression,0.7026	CWH43
gene_set_query	1517	THAP4	0.7044	Enrichr Queries,0.7044	CCND1,GDF15,MYC,FASN,IDH1,NEDD4L,FKBP5
gene_set_query	1518	ZNF543	0.7051	Enrichr Queries,0.7051	ARRDC4,AKAP12,GDF15,MYC,ZNF649,TP53INP1,IGF1R
gene_set_query	1519	MXD3	0.7058	ARCHS4 Coexpression,0.7058	SLC25A37
gene_set_query	1520	E2F1	0.7073	Literature ChIP-seq,0.7073	ALDH6A1,GLYATL1,MLPH,ARHGEF26,IRS1,MYC,MYO6,TCEA3,KLF9,PMEPA1,FKBP5
gene_set_query	1521	ZNF713	0.7101	Enrichr Queries,0.7101	ARRDC4,DLX2,NFIX,GDF15,TP53INP1,ADRB2,PAG1
gene_set_query	1522	NKRF	0.7115	Enrichr Queries,0.7115	AKAP12,CCND1,CITED2,GDF15,MYC,FASN,AMD1
gene_set_query	1523	RFX7	0.7119	ARCHS4 Coexpression,0.7119	TP53INP1
gene_set_query	1524	ZNF460	0.713	Enrichr Queries,0.713	CCND1,GDF15,MYC,FASN,IRS2,PDLIM5,IGF1R
gene_set_query	1525	ZNF653	0.7137	Enrichr Queries,0.7137	NPDC1,NFIX,CITED2,GDF15,FASN,IRS2,GC
gene_set_query	1526	ZNF417	0.7172	Enrichr Queries,0.7172	AKAP12,CCND1,GDF15,MYC,TP53INP1,ZNF577,IGF1R
gene_set_query	1527	IRF4	0.7175	GTEx Coexpression,0.7175
gene_set_query	1528	ZNF280C	0.7179	Enrichr Queries,0.7179	AKAP12,GDF15,MYC,TP53INP1,NEDD4L,IRS2,CLU
gene_set_query	1529	CGGBP1	0.7187	ARCHS4 Coexpression,0.7187	TP53INP1
gene_set_query	1530	VEZF1	0.7193	ARCHS4 Coexpression,0.7193	TP53INP1
gene_set_query	1531	ZNF490	0.7201	Enrichr Queries,0.7201	NFIX,GDF15,MYC,TP53INP1,NEDD4L,PLA1A,IGF1R
gene_set_query	1532	E4F1	0.7205	ARCHS4 Coexpression,0.7205	OPLAH
gene_set_query	1533	SAFB	0.7242	ARCHS4 Coexpression,0.7242
gene_set_query	1534	ZNF316	0.7251	Enrichr Queries,0.7251	GAMT,CCND1,GDF15,MYC,FASN,IRS2,GC
gene_set_query	1535	ZNF124	0.7265	Enrichr Queries,0.7265	AKAP12,GDF15,MYC,TP53INP1,IRS2,CLU,PAG1
gene_set_query	1536	TRAFD1	0.7267	ARCHS4 Coexpression,0.7267
gene_set_query	1537	RFX3	0.7268	GTEx Coexpression,0.7268
gene_set_query	1538	ZNF90	0.7279	ARCHS4 Coexpression,0.7279
gene_set_query	1539	GTF3A	0.7322	ARCHS4 Coexpression,0.7322
gene_set_query	1540	PROX2	0.7322	Enrichr Queries,0.7322	SLC22A23,MME,GDF15,GREB1,PMEPA1,NCAM2,ACPP
gene_set_query	1541	ZNF45	0.7334	ARCHS4 Coexpression,0.7334
gene_set_query	1542	ZNF157	0.7353	ARCHS4 Coexpression,0.7353
gene_set_query	1543	ZNF620	0.7358	Enrichr Queries,0.7358	SOCS2,GDF15,USP54,GREB1,TP53INP1,NEDD4L,CLGN
gene_set_query	1544	ZNF257	0.7365	Enrichr Queries,0.7365	AKAP12,CSGALNACT1,MME,ZNF229,NCAM2,AQP3,CLGN
gene_set_query	1545	BAZ2A	0.7377	ARCHS4 Coexpression,0.7377
gene_set_query	1546	ZNF557	0.7407	Enrichr Queries,0.7407	NFIX,GDF15,IRS1,MYC,PPM1K,PDLIM5,FKBP5
gene_set_query	1547	ZNF628	0.7415	Enrichr Queries,0.7415	NFIX,CITED2,GDF15,MYC,FASN,IRS2,GC
gene_set_query	1548	ZNF785	0.7418	GTEx Coexpression,0.7418
gene_set_query	1549	ZNF850	0.7424	GTEx Coexpression,0.7424
gene_set_query	1550	NFX1	0.7449	GTEx Coexpression,0.7449
gene_set_query	1551	BATF	0.7458	ENCODE ChIP-seq,0.7458	IQGAP2,AQP3,CLU,PLA1A
gene_set_query	1552	ETV3L	0.7461	GTEx Coexpression,0.7461
gene_set_query	1553	E2F3	0.7463	ARCHS4 Coexpression,0.7463
gene_set_query	1554	CENPA	0.748	GTEx Coexpression,0.748
gene_set_query	1555	ETV7	0.7482	ARCHS4 Coexpression,0.7482
gene_set_query	1556	DOT1L	0.7486	Enrichr Queries,0.7486	NFIX,CCND1,GDF15,MYC,FASN,NEDD4L,IRS2
gene_set_query	1557	TFDP1	0.7488	ARCHS4 Coexpression,0.7488
gene_set_query	1558	CIC	0.7507	Enrichr Queries,0.7507	NFIX,CCND1,MYC,FASN,KLF9,IRS2,IGF1R
gene_set_query	1559	ZBTB48	0.7514	Enrichr Queries,0.7514	CITED2,GDF15,MYC,FASN,IRS2,GC,DHRS3
gene_set_query	1560	ZNF337	0.7521	Enrichr Queries,0.7521	GDF15,MYC,FASN,TP53INP1,PMEPA1,IRS2,DHRS3
gene_set_query	1561	BATF2	0.7531	ARCHS4 Coexpression,0.7531
gene_set_query	1562	IRF7	0.7543	ARCHS4 Coexpression,0.7543
gene_set_query	1563	ZBTB6	0.7574	ARCHS4 Coexpression,0.7574
gene_set_query	1564	ZNF705A	0.7585	Enrichr Queries,0.7585	CCND1,HPGD,GDF15,MYC,IDH1,IGF1
gene_set_query	1565	ZNF717	0.76	Enrichr Queries,0.76	AKAP12,MME,CITED2,ZBTB16,NEDD4L,IRS2
gene_set_query	1566	REXO4	0.7604	ARCHS4 Coexpression,0.7604
gene_set_query	1567	NR2C2	0.7635	ARCHS4 Coexpression,0.7635
gene_set_query	1568	ZIM3	0.7647	ARCHS4 Coexpression,0.7647
gene_set_query	1569	ZNF668	0.7654	ARCHS4 Coexpression,0.7654
gene_set_query	1570	ZNF624	0.7664	Enrichr Queries,0.7664	ARRDC4,C5,CITED2,MYC,TP53INP1,RHOU
gene_set_query	1571	ZNF100	0.7671	Enrichr Queries,0.7671	ARRDC4,AKAP12,ZNF649,TP53INP1,IQGAP2,PAG1
gene_set_query	1572	ZNF513	0.7672	ARCHS4 Coexpression,0.7672
gene_set_query	1573	ZNF169	0.7707	Enrichr Queries,0.7707	VIPR1,GDF15,IRS1,MYC,TP53INP1,ZNF577
gene_set_query	1574	NAIF1	0.771	GTEx Coexpression,0.771
gene_set_query	1575	DRAP1	0.7721	ARCHS4 Coexpression,0.7721
gene_set_query	1576	PA2G4	0.7754	GTEx Coexpression,0.7754
gene_set_query	1577	ZKSCAN7	0.7758	ARCHS4 Coexpression,0.7758
gene_set_query	1578	ZNF705E	0.7778	GTEx Coexpression,0.7778
gene_set_query	1579	ZBTB11	0.7785	GTEx Coexpression,0.7785
gene_set_query	1580	ZNF646	0.7828	Enrichr Queries,0.7828	CITED2,GDF15,MYC,ZBTB16,IRS2,IGF1R
gene_set_query	1581	ZNF829	0.7842	Enrichr Queries,0.7842	GDF15,ZNF649,ZNF229,ZNF502,ZNF577,ZSCAN18
gene_set_query	1582	ZNF224	0.7856	Enrichr Queries,0.7856	CCND1,GDF15,MYC,TP53INP1,IRS2,IGF1R
gene_set_query	1583	DNMT1	0.7869	ARCHS4 Coexpression,0.7869
gene_set_query	1584	BORCS8MEF2B	0.7887	ARCHS4 Coexpression,0.7887
gene_set_query	1585	ZNF574	0.7905	ARCHS4 Coexpression,0.7905
gene_set_query	1586	ZNF843	0.7927	Enrichr Queries,0.7927	ARRDC4,CSGALNACT1,GDF15,IRS2,ADRB2,PAG1
gene_set_query	1587	DR1	0.7946	GTEx Coexpression,0.7946
gene_set_query	1588	ZNF683	0.7948	ARCHS4 Coexpression,0.7948
gene_set_query	1589	ZNF724	0.7953	GTEx Coexpression,0.7953
gene_set_query	1590	BPTF	0.801	ARCHS4 Coexpression,0.801
gene_set_query	1591	ZNF611	0.802	Enrichr Queries,0.802	AKAP12,GDF15,MYC,TP53INP1,NEDD4L,IGF1R
gene_set_query	1592	ZNF131	0.8021	GTEx Coexpression,0.8021
gene_set_query	1593	ZNF141	0.8034	Enrichr Queries,0.8034	AKAP12,ZNF649,TP53INP1,IRS2,IQGAP2,ZNF577
gene_set_query	1594	ZNF28	0.8056	Enrichr Queries,0.8056	ARRDC4,GDF15,MYC,TP53INP1,ZNF613,ZNF577
gene_set_query	1595	MSANTD4	0.8084	ARCHS4 Coexpression,0.8084
gene_set_query	1596	CXXC1	0.8091	Enrichr Queries,0.8091	CCND1,CITED2,GDF15,MYC,FASN,IRS2
gene_set_query	1597	ZNF225	0.812	ARCHS4 Coexpression,0.812
gene_set_query	1598	FBXL19	0.8139	GTEx Coexpression,0.8139
gene_set_query	1599	ZNF484	0.8164	GTEx Coexpression,0.8164
gene_set_query	1600	SKOR1	0.8214	GTEx Coexpression,0.8214
gene_set_query	1601	HSFX2	0.8237	ARCHS4 Coexpression,0.8237
gene_set_query	1602	ZNF768	0.8249	ARCHS4 Coexpression,0.8249
gene_set_query	1603	ZNF726	0.8258	GTEx Coexpression,0.8258
gene_set_query	1604	ZSCAN29	0.8326	GTEx Coexpression,0.8326
gene_set_query	1605	GPBP1L1	0.8329	ARCHS4 Coexpression,0.8329
gene_set_query	1606	ZNF788P	0.8332	GTEx Coexpression,0.8332
gene_set_query	1607	YBX1	0.8348	ARCHS4 Coexpression,0.8348
gene_set_query	1608	ZNF333	0.8351	GTEx Coexpression,0.8351
gene_set_query	1609	HMGA1	0.8372	ARCHS4 Coexpression,0.8372
gene_set_query	1610	ZNF492	0.8395	GTEx Coexpression,0.8395
gene_set_query	1611	THAP6	0.844	Enrichr Queries,0.844	ARRDC4,LATS2,CITED2,GDF15,IRS2
gene_set_query	1612	NEUROD4	0.8447	Enrichr Queries,0.8447	DLX2,TTR,MYC,ZBTB16,BMPR1B
gene_set_query	1613	NFE4	0.8475	GTEx Coexpression,0.8475
gene_set_query	1614	TTF1	0.8482	GTEx Coexpression,0.8482
gene_set_query	1615	CCDC169SOHLH2	0.8495	ARCHS4 Coexpression,0.8495
gene_set_query	1616	GMEB1	0.8497	Enrichr Queries,0.8497	GDF15,MYC,FASN,PMEPA1,FKBP5
gene_set_query	1617	SOHLH1	0.8533	Enrichr Queries,0.8533	GRIN3A,CUX2,GDF15,ZBTB16,IGF1
gene_set_query	1618	ZNF695	0.8619	GTEx Coexpression,0.8619
gene_set_query	1619	CENPBD1	0.8643	ARCHS4 Coexpression,0.8643
gene_set_query	1620	ZNF519	0.8661	ARCHS4 Coexpression,0.8661
gene_set_query	1621	ZNF526	0.8675	Enrichr Queries,0.8675	NFIX,CITED2,GDF15,MYC,FASN
gene_set_query	1622	ZBTB49	0.8692	ARCHS4 Coexpression,0.8692
gene_set_query	1623	ZNF530	0.8718	GTEx Coexpression,0.8718
gene_set_query	1624	ZNF865	0.8811	GTEx Coexpression,0.8811
gene_set_query	1625	ZNF335	0.8839	ARCHS4 Coexpression,0.8839
gene_set_query	1626	ZNF142	0.8849	GTEx Coexpression,0.8849
gene_set_query	1627	PRMT3	0.8851	ARCHS4 Coexpression,0.8851
gene_set_query	1628	POU5F2	0.8962	ARCHS4 Coexpression,0.8962
gene_set_query	1629	ZSCAN32	0.9197	GTEx Coexpression,0.9197
gene_set_query	1630	ATF6B	0.921	GTEx Coexpression,0.921
gene_set_query	1631	LIN54	0.9496	GTEx Coexpression,0.9496
gene_set_query	1632	ZNF814	0.9757	GTEx Coexpression,0.9757

## Sheet: Integrated_topRank_MSPC_up
Query Name	Rank	TF	Score	Library	Overlapping_Genes
gene_set_query	1	STAT1	0.0006143	ARCHS4 Coexpression,6.143E-4	CD40,SAMD9L,IFIT5,UBE2L6,IKZF1,IFI35,IFIT1,NR3C1,ETS1,IFIT3,IFI44L,IFIT2,LAMP3,EPSTI1,RAC2,RSAD2,HLA-A,HLA-E,PLSCR1,MDFIC,OAS1,OAS2,OAS3,SLFN5,SP100,SAMD9,IFI6,ATP10A,DDX60,APOL6,IFI16,APOL1,GBP1,APOL3,GBP4,GBP3,ERAP2,MX2,MX1,IFI44,MSN,ISG15,PARP14,PSMB8,BST2,CXCL10,FAS,XAF1,MYO1G
gene_set_query	2	ETS1	0.0006223	GTEx Coexpression,6.223E-4	HCP5,SLFN5,SP100,SAMD9L,SH3KBP1,IKZF1,IL27RA,DOCK11,APOL6,IFI16,INPP5D,EPSTI1,CTSC,APOL3,GBP4,HLA-DRB5,ERAP2,PLEKHA2,MSN,HLA-A,PARP14,PSMB8,BMP6,HLA-E,SLFN13,PLSCR1,SLFN11,CLEC2B,MDFIC,HLA-DRA,PPARG,FXYD5,TRIM38,SP140L
gene_set_query	3	SP110	0.0007123	Enrichr Queries,7.123E-4	IFITM3,RTP4,IFITM1,CD40,SAMD9L,IFITM2,TINAGL1,IFIT5,UBE2L6,IKZF1,IFI35,IFIT1,ETS1,IFIT3,IFI44L,IFIT2,ICAM1,OASL,LGALS3,RGS1,LAMP3,ARHGDIB,EPSTI1,RAC2,CTSC,TGM2,SRGN,DUSP5,ANXA1,RSAD2,MYOF,EMP1,PLSCR1,IFI27,OAS1,OAS2,OAS3,S100A9,CD44,SLFN5,SP100,SAMD9,IFI6,PTGS2,DDX60,APOL6,GPNMB,IFI16,INPP5D,CCL2,GBP1,GBP4,GBP3,MX2,MX1,IFI44,ISG15,PARP14,PSMB8,BST2,CXCL10,FXYD5,XAF1,MYO1G
gene_set_query	4	PLSCR1	0.001229	ARCHS4 Coexpression,0.001229	IFITM3,RTP4,IFITM1,CD40,SAMD9L,UBE2L6,IFI35,IFIT1,IFIT3,IFI44L,IFIT2,ICAM1,OASL,LGALS3,PSTPIP2,KYNU,EPSTI1,SRGN,RSAD2,HLA-A,IFI27,OAS1,OAS2,OAS3,TLR4,SAMD9,IFI6,LY96,PTGS2,DDX60,APOL6,IFI16,CLEC7A,ST3GAL6,GBP1,GBP3,HLA-DRB5,CCL20,MX2,MX1,IFI44,ISG15,PARP14,PSMB8,BST2,CXCL10,HLA-DRA,XAF1
gene_set_query	5	SP100	0.001245	GTEx Coexpression,0.001245	RTP4,HCP5,IFITM1,CD40,SAMD9L,HEXA,GIMAP2,IKZF1,IFI35,DDX60,ETS1,IL27RA,IFI16,INPP5D,EPSTI1,APOBEC3C,APOBEC3G,ERAP2,PLEKHA2,MX2,MSN,HLA-A,PARP14,PSMB8,SLFN13,PLSCR1,MDFIC,OAS2,FAS,HLA-DRA,FXYD5,TRIM38,SP140L,MYO1G
gene_set_query	6	STAT2	0.001843	ARCHS4 Coexpression,0.001843	IFITM3,SLFN5,SP100,SAMD9L,IFITM2,SAMD9,IFI6,UBE2L6,ATP10A,IFI35,IFIT1,DDX60,IFIT3,IFI44L,IFIT2,APOL6,IFI16,CLEC7A,EPSTI1,JAK3,GBP1,APOL3,GBP4,GBP3,IL4R,RSAD2,MX2,MX1,IFI44,ISG15,HLA-A,PARP14,HLA-E,CXCL10,PLSCR1,OAS1,OAS2,OAS3,TRIM38,XAF1,TLR4,MYO1G
gene_set_query	7	IRF9	0.001867	GTEx Coexpression,0.001867	RTP4,HCP5,IFITM1,SP100,SAMD9L,GIMAP2,UBE2L6,IKZF1,IFI35,IFIT3,IL27RA,INPP5D,ARHGDIB,EPSTI1,RAC2,JAK3,DENND2D,APOBEC3G,MX2,MX1,IFI44,HLA-A,PARP14,VAV1,PSMB8,HLA-E,OAS1,XAF1,SP140L,MYO1G
gene_set_query	8	BATF3	0.002489	GTEx Coexpression,0.002489	IFITM3,IFITM1,CD40,SP100,SAMD9L,MCTP1,SH3KBP1,UBE2L6,IFI35,ETS1,IFI44L,ICAM1,IFI16,EPSTI1,CCL2,APOL1,GBP1,GBP4,APOBEC3G,MX1,MSN,PARP14,PSMB8,CXCL10,PLSCR1,OAS2,OAS3,HLA-DRA,MYO1G
gene_set_query	9	ETV7	0.003071	ARCHS4 Coexpression,0.003071	IFITM3,RTP4,CD40,SAMD9L,IFITM2,IFI6,UBE2L6,IFI35,IFIT1,DDX60,IFIT3,IFI44L,IFIT2,ICAM1,OASL,APOL6,PSTPIP2,EPSTI1,RAC2,GBP1,APOL3,GBP4,HLA-H,RSAD2,MX2,MX1,IFI44,ISG15,HLA-A,PARP14,VAV1,PSMB8,HLA-E,BST2,CXCL10,PLSCR1,OAS1,OAS2,OAS3,XAF1
gene_set_query	10	NFKB2	0.003111	GTEx Coexpression,0.003111	HCP5,CD40,SP100,SAMD9L,IFI35,ICAM1,IL27RA,IFI16,INPP5D,EPSTI1,RAC2,APOBEC3C,DENND2D,IL4R,APOBEC3G,MX2,MSN,HLA-A,PARP14,PSMB8,SLFN13,OAS2,FAS,HLA-DRA,TRIM38,SP140L,SKAP1,MYO1G
gene_set_query	11	IRF7	0.003561	Enrichr Queries,0.003561	IFITM3,RTP4,IFITM1,CD40,SAMD9L,IFITM2,TINAGL1,UBE2L6,IFI35,IFIT1,IFIT3,IFI44L,IFIT2,ICAM1,OASL,LGALS3,RGS1,LAMP3,ARHGDIB,EPSTI1,RAC2,CTSC,TGM2,SRGN,DUSP5,ANXA1,RSAD2,ANXA2,EMP1,PLSCR1,IFI27,OAS1,OAS2,OAS3,S100A6,S100A9,CD44,SLFN5,SP100,SAMD9,IFI6,PTGS2,DDX60,APOL6,GPNMB,IFI16,CLEC7A,CCL2,GBP1,GBP4,GBP3,MX2,MX1,IFI44,ISG15,PARP14,PSMB8,BST2,CXCL10,FXYD5,XAF1
gene_set_query	12	SP140	0.003686	ARCHS4 Coexpression,0.003686	SLFN5,SP100,SAMD9L,SH3KBP1,HVCN1,LRRK2,IKZF1,IFI35,ETS1,IFI44L,APOL6,IFI16,INPP5D,ARHGDIB,EPSTI1,RAC2,JAK3,APOL3,DENND2D,HLA-H,IL4R,APOBEC3G,PLEKHA2,MX2,MX1,HLA-A,PARP14,SORL1,VAV1,PSMB8,HLA-E,TMEM154,OAS1,OAS2,TRIM38,XAF1,SP140L,MYO1G
gene_set_query	13	FLI1	0.004356	GTEx Coexpression,0.004356	HCP5,IFITM1,SP100,SAMD9L,GIMAP2,LY96,IKZF1,ETS1,IL27RA,CLEC7A,PSTPIP2,INPP5D,ARHGDIB,RAC2,JAK3,APOL3,MX2,MSN,HLA-A,VAV1,PSMB8,HLA-E,PTPRE,FXYD5,SP140L,TLR4
gene_set_query	14	BATF	0.004914	ARCHS4 Coexpression,0.004914	CD40,LY96,UBE2L6,IKZF1,IFI35,ICAM1,IL27RA,ARHGDIB,EPSTI1,RAC2,JAK3,GBP1,APOL3,GBP4,APOBEC3C,DENND2D,SRGN,DUSP5,HLA-H,IL4R,APOBEC3G,MX2,ISG15,HLA-A,VAV1,PSMB8,HLA-E,BST2,CLEC2B,CD8B,OAS1,OAS2,FAS,FXYD5,MYO1G
gene_set_query	15	NFE2L2	0.004978	GTEx Coexpression,0.004978	CSTA,TTC22,GSTP1,TMPRSS4,TACSTD2,FZD10,THSD4,SFN,TP63,MPZL2,ANXA1,SPINK5,IL18,EMP1,KRT5,TMPRSS11E,KLK10,KLK11,TMEM154,FERMT1,FABP5,LPAR6,KRT15,SPRR1A
gene_set_query	16	IRF1	0.004986	Enrichr Queries,0.004986	IFITM3,RTP4,IFITM1,CD40,SAMD9L,IFITM2,TINAGL1,UBE2L6,IFI35,IFIT1,ETS1,IFIT3,IFI44L,IFIT2,ICAM1,OASL,LGALS3,CCND2,ARHGDIB,EPSTI1,RAC2,PHLDA1,CTSC,TGM2,SRGN,DUSP5,ANXA1,RSAD2,ANXA2,EMP1,PLSCR1,IFI27,OAS1,OAS2,OAS3,S100A6,S100A9,CD44,SLFN5,SP100,PTGS2,DDX60,APOL6,IFI16,CCL2,GBP1,GBP4,GBP3,MX2,MX1,IFI44,ISG15,PARP14,PSMB8,BST2,CXCL10,XAF1
gene_set_query	17	BATF2	0.005528	ARCHS4 Coexpression,0.005528	IFITM3,CD40,SAMD9L,IFITM2,IFI6,IFI35,IFIT1,IFIT3,IFIT2,ICAM1,APOL6,EPSTI1,CHST15,APOL1,GBP1,APOL3,IL4R,RSAD2,MX2,MX1,PNMA5,IFI44,ISG15,HLA-A,PARP14,HLA-E,OAS1,OAS2,OAS3,TLR4,S100A9
gene_set_query	18	ZNF792	0.0056	GTEx Coexpression,0.0056	SLFN5,IFITM1,SP100,GIMAP2,MSN,HLA-A,ETS1,PSMB8,BMP6,IL27RA,HLA-E,DOCK11,PLSCR1,APOL6,SLFN11,MDFIC,IFI16,PPARG,FXYD5,TRIM38,SP140L,APOL3,GBP4
gene_set_query	19	SOX2	0.006098	Literature ChIP-seq,0.006098	GALNT12,IFITM1,GALNT14,GDA,UBE2L6,FZD10,IFI35,AHR,IFIT1,NR3C1,CLDN1,ETS1,IFIT2,IL27RA,PYCARD,DOCK11,POF1B,ARHGDIB,PLS3,TNS4,PITX2,MAGEA6,PHLDA1,MAGEA3,SLC16A5,TGM2,SPINK5,WDR72,HLA-E,IFI27,CLIP4,KCTD12,XIST,MAGEA12,TACSTD2,DAPP1,FBLN1,PIK3R1,GJC1,ARSJ,CHST15,SNX5,APOBEC3C,IFI44,ISG15,PARP14,BMP7,BST2,BMP4,SPRR1A,MCTP1,SH3KBP1,PTPRO,FHL1,KRT20,OASL,SDR16C5,PSTPIP2,SOSTDC1,DENND2D,DUSP5,GPX3,PLA2G4…
gene_set_query	20	NFKB1	0.006143	ARCHS4 Coexpression,0.006143	CD40,SAMD9L,IFI35,AHR,PTGS2,NR3C1,IFIT3,ICAM1,PSTPIP2,EPSTI1,GBP1,APOL3,SRGN,DUSP5,IL4R,RSAD2,MX2,MX1,IFI44,MSN,HLA-A,PARP14,VAV1,MDFIC,OAS1,OAS2,OAS3,HLA-DRA,TLR4,CD44,MYO1G
gene_set_query	21	TFEC	0.006223	GTEx Coexpression,0.006223	SP100,SAMD9L,LRRK2,GIMAP2,LY96,MSN,IKZF1,HLA-A,PARP14,VAV1,PSMB8,IL27RA,HLA-E,PTPRE,CLEC7A,PSTPIP2,INPP5D,HLA-DRA,TRIM38,SP140L,JAK3,TLR4,CTSC
gene_set_query	22	PROX1	0.006734	ReMap ChIP-seq,0.006734	SLFN5,TINAGL1,GDA,FHL2,ATP10A,FZD10,CLDN1,LGALS3,SDR16C5,SFN,IGF2BP3,TNS4,PHLDA1,CTSC,MPZL2,SLC16A5,DUSP5,FAM9B,ANXA1,ANXA2,TPM4,ANXA3,CCL20,MX2,MACC1,MYOF,ITGA1,EMP1,KRT5,BMP7,SORL1,TM4SF1,PTPRE,CDK6,VSNL1,KRT15,CLIP4,B3GNT3,S100A6,DNASE1L3
gene_set_query	23	ZNF267	0.006757	ARCHS4 Coexpression,0.006757	CD40,SAMD9L,LY96,IKZF1,IFI35,PTGS2,NR3C1,ICAM1,APOL6,CLEC7A,PSTPIP2,KYNU,EPSTI1,GBP1,GBP4,SRGN,DUSP5,RSAD2,MX2,IFI44,PARP14,HLA-E,PTPRE,PLSCR1,CLEC2B,OAS1,OAS2,FAS,TLR4,MYO1G
gene_set_query	24	NR3C1	0.007371	ARCHS4 Coexpression,0.007371	SLFN5,SP100,SH3KBP1,IKZF1,PIK3R1,AHR,ETS1,DOCK11,APOL6,IFI16,KYNU,IGF2BP1,SRGN,RSAD2,PLEKHA2,IFI44,MSN,HLA-A,PARP14,HLA-E,SLFN11,CLEC2B,MDFIC,OAS1,OAS2,FAS,TACC1,TLR4,CD44,MYO1G
gene_set_query	25	PRDM1	0.007467	GTEx Coexpression,0.007467	DENND2D,DUSP5,CSTA,ANXA1,SAMD9,TTC22,GSTP1,TMPRSS4,SPINK5,IL18,TACSTD2,EMP1,DAPP1,FZD10,TMPRSS11E,KLK10,KLK11,TMEM154,FABP5,SFN,SPRR1A,S100A9,MPZL2
gene_set_query	26	ZFY	0.007835	Enrichr Queries,0.007835	SAMD9L,PLAT,AHR,IFIT1,IFIT3,IFI44L,IFIT2,ICAM1,OASL,CCND2,RGS1,LAMP3,EPSTI1,ENPP2,TGM2,SRGN,DUSP5,ANXA1,RSAD2,ANXA3,EMP1,PLA2G4A,SFRP1,IFI27,CHI3L1,PPARG,XIST,BCAT1,TLR4,S100A9,SAMD9,IFI6,PIK3R1,PTGS2,DDX60,GPNMB,NLRP2,CCL2,GBP1,BCHE,NQO1,ERAP2,CCL20,MX1,IFI44,ISG15,BST2,CXCL10,CDK6,CLEC2B,S100P,XAF1
gene_set_query	27	RELB	0.00809	GTEx Coexpression,0.00809	HCP5,IFITM1,SP100,IL4R,APOBEC3G,MX2,MSN,IKZF1,HLA-A,VAV1,PSMB8,ICAM1,IL27RA,HLA-E,PLSCR1,IFI16,INPP5D,RAC2,FXYD5,TRIM38,SP140L,JAK3,MYO1G
gene_set_query	28	NFE2L3	0.008547	Enrichr Queries,0.008547	IFITM3,RTP4,IFITM1,SAMD9L,TINAGL1,FHL2,UBE2L6,PLAT,IFI35,IFIT1,CLDN1,ETS1,IFIT3,IFIT2,ICAM1,OASL,LGALS3,CCND2,LAMP3,EPSTI1,PHLDA1,CTSC,TGM2,DUSP5,ANXA1,RSAD2,ANXA2,ANXA3,ITGA2,MYOF,EMP1,SFRP1,IFI27,OAS1,OAS2,OAS3,PPARG,CD44,PTGS2,DDX60,CCL2,GBP1,GBP4,MX2,MX1,IFI44,ISG15,PARP14,BST2,CXCL10,CDK6,XAF1
gene_set_query	29	TRAFD1	0.0086	ARCHS4 Coexpression,0.0086	RTP4,SAMD9L,IFITM2,UBE2L6,IFI35,IFIT3,IFI44L,IFIT2,EPSTI1,RAC2,GBP1,APOL3,GBP4,RSAD2,MX2,MX1,IFI44,HLA-A,PARP14,PSMB8,HLA-E,BST2,CXCL10,OAS1,OAS2,OAS3,S100A9,MYO1G
gene_set_query	30	ARNTL2	0.009214	ARCHS4 Coexpression,0.009214	CSTA,TINAGL1,AHR,SDR16C5,CDH3,ARSJ,PLS3,SFN,TNS4,PHLDA1,TP63,MPZL2,DUSP5,ANXA1,ANXA2,TPM4,ANXA3,ITGA2,MACC1,MYOF,IL18,EMP1,KRT5,KLK10,FERMT1,S100A6,SPATS2L,CD44
gene_set_query	31	HDX	0.009259	Enrichr Queries,0.009259	RTP4,IFITM1,SAMD9L,TINAGL1,UBE2L6,IFI35,AHR,IFIT1,NR3C1,IFIT3,IFI44L,IFIT2,ICAM1,OASL,CCND2,LAMP3,EPSTI1,ENPP2,DUSP5,RSAD2,PLSCR1,IFI27,OAS1,OAS2,OAS3,CD44,SLFN5,SP100,SAMD9,IFI6,ATP10A,PTGS2,DDX60,HDAC9,APOL6,CCL2,GBP1,GBP4,GBP3,MX2,MX1,IFI44,ISG15,PARP14,PSMB8,BST2,CXCL10,CDK6,XAF1
gene_set_query	32	ZNF860	0.009334	GTEx Coexpression,0.009334	CSTA,ANXA1,SAMD9,TTC22,GSTP1,TMPRSS4,SPINK5,TACSTD2,EMP1,DAPP1,KRT5,TMPRSS11E,KLK10,KLK11,THSD4,TMEM154,FABP5,LPAR6,KRT15,SFN,SPRR1A,MPZL2
gene_set_query	33	IRF8	0.009828	ARCHS4 Coexpression,0.009828	CD40,SAMD9L,SH3KBP1,HVCN1,IKZF1,IFI44L,IFI16,INPP5D,EPSTI1,RAC2,CTSC,SRGN,DUSP5,HLA-DRB5,IL4R,PLEKHA2,MX2,MX1,HLA-A,PARP14,VAV1,PTPRE,MDFIC,OAS1,OAS2,HLA-DRA,CPVL,MYO1G
gene_set_query	34	HESX1	0.009972	Enrichr Queries,0.009972	IFITM3,RTP4,IFITM1,CD40,SAMD9L,IFITM2,TINAGL1,UBE2L6,IFI35,IFIT1,IFIT3,IFI44L,IFIT2,ICAM1,OASL,RGS1,LAMP3,EPSTI1,CTSC,DUSP5,ANXA1,RSAD2,MYOF,EMP1,PLSCR1,IFI27,OAS1,OAS2,OAS3,PPARG,CD44,SAMD9,IFI6,PTGS2,DDX60,APOL6,CCL2,GBP1,GBP4,GBP3,MX2,MX1,IFI44,ISG15,PARP14,PSMB8,BST2,CXCL10,XAF1
gene_set_query	35	TEAD1	0.0101	ReMap ChIP-seq,0.0101	SAMD9L,TINAGL1,SAMD9,SH3KBP1,TACSTD2,IFIT3,PAPSS2,IFIT2,RGS1,ARSJ,KYNU,PLS3,IGFBP7,TNS4,SNX5,TGM2,FAM9B,ANXA1,ANXA2,ANXA3,PLEKHA2,MACC1,MYOF,ITGA1,IL18,EMP1,TM4SF1,DKK3,BMP4,CDK6,KRT15,RAB34,LPCAT2,CLIP4,S100A6,SPATS2L,CD44
gene_set_query	36	TBX6	0.01058	GTEx Coexpression,0.01058	CSTA,ANXA1,SAMD9,TTC22,GSTP1,TMPRSS4,SPINK5,TACSTD2,EMP1,DAPP1,FZD10,TMPRSS11E,KLK10,KLK11,THSD4,TMEM154,FABP5,LPAR6,KRT15,SFN,SPRR1A,MPZL2
gene_set_query	37	GRHL3	0.0112	GTEx Coexpression,0.0112	CSTA,ANXA1,TTC22,GSTP1,SPINK5,IL18,TACSTD2,EMP1,DAPP1,FZD10,KRT5,TMPRSS11E,KLK10,KLK11,TMEM154,SDR16C5,FABP5,KRT15,SFN,SPRR1A,TP63,MPZL2
gene_set_query	38	NFATC2	0.01167	ARCHS4 Coexpression,0.01167	SLFN5,SP100,SH3KBP1,DAPP1,IKZF1,ETS1,DOCK11,APOL6,IFI16,INPP5D,ARHGDIB,RAC2,JAK3,APOL3,DENND2D,IL4R,ERAP2,PLEKHA2,MSN,HLA-A,SORL1,PSMB8,HLA-E,MDFIC,FXYD5,TRIM38,MYO1G
gene_set_query	39	L3MBTL3	0.01182	GTEx Coexpression,0.01182	APOBEC3C,IFITM1,SP100,PLEKHA2,HEXA,GIMAP2,LY96,MSN,IKZF1,HLA-A,VAV1,BST2,IFI16,PSTPIP2,INPP5D,FAS,FXYD5,TRIM38,SP140L,JAK3,TLR4
gene_set_query	40	BACH1	0.0122	Literature ChIP-seq,0.0122	GALNT12,IFITM1,HFE,FHL1,HTR2C,DDX43,PLAT,CSAG2,IL1RAP,CLDN1,ICAM1,CCND2,POF1B,LAMP3,MAGEA1,UGT2A3,IL13RA2,MAGEA6,JAK3,PHLDA1,MAGEA4,SSX1,TGM2,DENND2D,BHMT2,PLA2G4A,MITF,TMPRSS11E,HLA-E,ANO3,SFRP1,ARMCX2,VSNL1,RGN,ELMO1,PPARG,CD44,CSTA,MAGEA12,LAMA1,SEMA3E,PIK3R1,PTGS2,HDAC9,GJC1,CST1,APOL6,CLEC7A,PRDM16,SLCO1B3,NLRP2,TRPM6,MPZL2,NQO1,APOBEC3G,SLC12A1,CLEC2B,FABP5,LPAR6,TACC1,CPVL,ZNF257
gene_set_query	41	ELF1	0.01229	ARCHS4 Coexpression,0.01229	SLFN5,SP100,DAPP1,IKZF1,NR3C1,ETS1,LGALS3,DOCK11,APOL6,IFI16,PSTPIP2,INPP5D,ARHGDIB,EPSTI1,RAC2,SRGN,ERAP2,PLEKHA2,MSN,HLA-A,PSMB8,HLA-E,CLEC2B,FXYD5,TRIM38,MYO1G
gene_set_query	42	SOX7	0.01245	GTEx Coexpression,0.01245	CSTA,TTC22,GSTP1,ITGA2,SPINK5,IL18,TACSTD2,EMP1,FZD10,KRT5,TMPRSS11E,KLK10,TM4SF1,KLK11,FABP5,LPAR6,KRT15,SFN,SPRR1A,TP63,MPZL2
gene_set_query	43	ETV6	0.0129	ARCHS4 Coexpression,0.0129	SP100,DAPP1,IKZF1,AHR,PYCARD,DOCK11,APOL6,IFI16,CLEC7A,PSTPIP2,INPP5D,ARHGDIB,RAC2,JAK3,SRGN,MX2,PARP14,VAV1,PTPRE,CDK6,LPCAT2,ELMO1,HLA-DRA,TRIM38,XAF1,MYO1G
gene_set_query	44	PITX1	0.01307	GTEx Coexpression,0.01307	CSTA,ANXA1,SAMD9,TTC22,GSTP1,TMPRSS4,SPINK5,TACSTD2,EMP1,DAPP1,FZD10,KRT5,TMPRSS11E,KLK10,KLK11,THSD4,FABP5,KRT15,SFN,SPRR1A,MPZL2
gene_set_query	45	ELF3	0.01347	ReMap ChIP-seq,0.01347	HFE,ATP10A,IFIT2,LGALS3,RGS1,ARSJ,KYNU,CHST15,IGF2BP1,IGFBP7,TNS4,SNX5,MPZL2,SLC16A5,TGM2,DUSP5,ANXA1,ANXA2,ANXA3,ITGA2,MACC1,MYOF,ITGA1,IL18,EMP1,ISG15,TM4SF1,VAV1,TMEM154,PTPRE,MMP14,KRT15,RAB34,CLIP4,S100A6,S100P,BCAT1
gene_set_query	46	RUNX2	0.01351	ARCHS4 Coexpression,0.01351	SLFN5,SP100,SH3KBP1,IKZF1,AHR,NR3C1,PYCARD,DOCK11,IFI16,INPP5D,ARHGDIB,RAC2,JAK3,SRGN,ERAP2,MX2,MSN,HLA-E,TMEM154,PTPRE,CLEC2B,MDFIC,HLA-DRA,FXYD5,TRIM38,MYO1G
gene_set_query	47	ELF4	0.01353	Enrichr Queries,0.01353	IFITM3,SLFN5,IFITM1,SP100,SAMD9L,IFITM2,TINAGL1,SH3KBP1,FHL2,UBE2L6,IKZF1,PTGS2,ETS1,IFIT3,IFIT2,ICAM1,LGALS3,CCND2,INPP5D,ARHGDIB,EPSTI1,CHST15,RAC2,CCL2,CTSC,TGM2,SRGN,DUSP5,ANXA1,ANXA2,TPM4,ANXA3,MYOF,EMP1,MSN,ISG15,PARP14,BST2,CXCL10,MMP14,CDK6,S100A6,FXYD5,TLR4,CD44,FBN1
gene_set_query	48	ZBTB7C	0.01369	GTEx Coexpression,0.01369	CSTA,TTC22,GSTP1,TMPRSS4,SPINK5,IL18,TACSTD2,FZD10,KRT5,KLK10,TMPRSS13,KLK11,TMEM154,FERMT1,SDR16C5,FABP5,KRT15,SFN,SPRR1A,TP63,MPZL2
gene_set_query	49	AHR	0.01536	ARCHS4 Coexpression,0.01536	SLFN5,PTGS2,NR3C1,ICAM1,APOL6,GPNMB,MPZL2,SRGN,ANXA1,TPM4,ITGA2,MYOF,EMP1,MSN,PARP14,PTPRE,MMP14,MDFIC,HLA-DRA,TACC1,KCTD12,TLR4,CD44,FBN1
gene_set_query	50	HES2	0.01556	GTEx Coexpression,0.01556	CSTA,TTC22,GSTP1,TMPRSS4,SPINK5,IL18,TACSTD2,FZD10,KRT5,KLK10,TMPRSS13,KLK11,TMEM154,FERMT1,SDR16C5,FABP5,KRT15,SFN,SPRR1A,TP63,MPZL2
gene_set_query	51	ZBED2	0.01567	Enrichr Queries,0.01567	CSTA,TINAGL1,SAMD9,TMPRSS4,IFI6,PLAT,IFIT1,PTGS2,DDX60,CLDN1,IFIT3,IFI44L,OASL,LAMP3,EPSTI1,CCL2,PHLDA1,GBP1,TP63,MPZL2,TGM2,DUSP5,ANXA1,RSAD2,ANXA3,CCL20,GPX3,ITGA2,MX1,IL18,IFI44,EMP1,ISG15,KLK10,CXCL10,IFI27,VSNL1,OAS1,KRT15,OAS3,PPARG,S100P,XAF1,S100A9
gene_set_query	52	MSC	0.01597	ARCHS4 Coexpression,0.01597	CD40,CD163L1,LY96,IFI35,PTGS2,NR3C1,IFIT3,ICAM1,LGALS3,GPNMB,PSTPIP2,KYNU,EPSTI1,CCL2,GBP1,DUSP5,RSAD2,IFI44,ISG15,PLSCR1,MMP14,OAS1,OAS2,MYO1G
gene_set_query	53	MSGN1	0.01618	GTEx Coexpression,0.01618	CSTA,ANXA1,SAMD9,TTC22,GSTP1,TMPRSS4,SPINK5,TACSTD2,EMP1,DAPP1,KRT5,TMPRSS11E,KLK10,KLK11,THSD4,FABP5,LPAR6,KRT15,SFN,SPRR1A,MPZL2
gene_set_query	54	SP140L	0.01658	ARCHS4 Coexpression,0.01658	SLFN5,SP100,IKZF1,ETS1,APOL6,IFI16,CLEC7A,INPP5D,ARHGDIB,RAC2,JAK3,GBP4,HLA-H,IL4R,ERAP2,MX2,PARP14,VAV1,PSMB8,HLA-E,CLEC2B,TRIM38,XAF1,MYO1G
gene_set_query	55	IRF5	0.0168	GTEx Coexpression,0.0168	APOBEC3C,DENND2D,HCP5,CD40,APOBEC3G,SH3KBP1,HVCN1,MX2,DAPP1,IKZF1,PSMB8,IL27RA,SLFN13,OAS1,OAS2,INPP5D,OAS3,RAC2,HLA-DRA,SKAP1,MYO1G
gene_set_query	56	HES4	0.01709	Enrichr Queries,0.01709	IFITM3,IFITM1,SAMD9L,IFITM2,SAMD9,IFI6,UBE2L6,IFI35,IFIT1,PTGS2,IFIT3,IFI44L,IFIT2,ICAM1,OASL,IFI16,LAMP3,EPSTI1,CCL2,PHLDA1,GBP1,GBP4,DUSP5,ANXA1,RSAD2,CCL20,MX2,MX1,IFI44,EMP1,ISG15,PARP14,BST2,CXCL10,PLSCR1,IFI27,OAS1,OAS2,OAS3,S100A6,XAF1,CD44
gene_set_query	57	IKZF3	0.0172	ARCHS4 Coexpression,0.0172	APOBEC3C,DENND2D,SLFN5,SP100,IL4R,APOBEC3G,PLEKHA2,HVCN1,MX2,IKZF1,HLA-A,ETS1,VAV1,HLA-E,TMEM154,APOL6,IFI16,INPP5D,RAC2,TRIM38,XAF1,JAK3,MYO1G
gene_set_query	58	HOXB1	0.01742	GTEx Coexpression,0.01742	CSTA,ANXA1,TTC22,GSTP1,TMPRSS4,SPINK5,IL18,TACSTD2,EMP1,FZD10,KRT5,TMPRSS11E,KLK10,KLK11,TMEM154,FABP5,KRT15,SFN,SPRR1A,TP63,MPZL2
gene_set_query	59	STAT4	0.01781	Enrichr Queries,0.01781	IFITM3,IFITM1,CD40,SAMD9L,TINAGL1,IKZF1,IFIT1,PTGS2,DDX60,ETS1,IFIT3,IFI44L,IFIT2,ICAM1,OASL,LGALS3,CCND2,RGS1,INPP5D,KYNU,ARHGDIB,EPSTI1,RAC2,CCL2,GBP1,GBP4,TGM2,SRGN,DUSP5,ANXA1,RSAD2,GPX3,MX1,IFI44,ISG15,PSMB8,CXCL10,PLSCR1,OAS2,XAF1,S100A9,CD44
gene_set_query	60	EHF	0.01805	GTEx Coexpression,0.01805	CSTA,ANXA1,SAMD9,TTC22,GSTP1,TMPRSS4,SPINK5,TACSTD2,EMP1,FZD10,KRT5,TMPRSS11E,KLK10,KLK11,THSD4,FABP5,KRT15,SFN,SPRR1A,PHLDA1,MPZL2
gene_set_query	61	IRF2	0.01843	ARCHS4 Coexpression,0.01843	SAMD9L,IFITM2,IL4R,MX2,MSN,UBE2L6,IKZF1,IFI35,HLA-A,IFIT3,PSMB8,HLA-E,TMEM154,OAS1,CLEC7A,OAS2,INPP5D,ARHGDIB,EPSTI1,RAC2,TLR4,APOL3,MYO1G
gene_set_query	62	SCML4	0.01904	ARCHS4 Coexpression,0.01904	DENND2D,SLFN5,HLA-H,SP100,IFITM2,ERAP2,GIMAP2,IKZF1,ETS1,PSMB8,HLA-E,TMEM154,CLEC2B,CD8B,INPP5D,ARHGDIB,RAC2,FXYD5,SP140L,JAK3,SKAP1,MYO1G
gene_set_query	63	ZNF600	0.01923	Enrichr Queries,0.01923	IFITM3,SLFN5,IFITM1,SAMD9L,IFITM2,TINAGL1,SAMD9,IFI6,DAPP1,AHR,IFIT1,ETS1,IFIT3,IFI44L,IFIT2,ICAM1,CCND2,GPNMB,IFI16,LAMP3,EPSTI1,GBP1,GBP3,DUSP5,ANXA1,RSAD2,APOBEC3G,ERAP2,ANXA3,MX1,IL18,IFI44,ISG15,PARP14,SORL1,CXCL10,IFI27,OAS1,S100A6,XAF1,CD44
gene_set_query	64	PAX9	0.01929	GTEx Coexpression,0.01929	DUSP5,CSTA,ANXA1,SAMD9,TTC22,GSTP1,TMPRSS4,SPINK5,TACSTD2,EMP1,DAPP1,FZD10,TMPRSS11E,KLK10,THSD4,FABP5,KRT15,SFN,SPRR1A,MPZL2
gene_set_query	65	ZBTB32	0.01966	ARCHS4 Coexpression,0.01966	APOBEC3C,DUSP5,CD40,IL4R,APOBEC3G,SH3KBP1,HVCN1,MX1,HLA-A,NR3C1,ETS1,PSMB8,IFI44L,MDFIC,OAS1,IFI16,OAS2,OAS3,RAC2,FAS,HLA-DRA,MYO1G
gene_set_query	66	ZNF431	0.01991	GTEx Coexpression,0.01991	DUSP5,CSTA,ANXA1,SAMD9,TTC22,GSTP1,SPINK5,IL18,TACSTD2,EMP1,DAPP1,FZD10,TMPRSS11E,KLK10,KLK11,TMEM154,FABP5,SFN,SPRR1A,MPZL2
gene_set_query	67	MXD1	0.01994	Enrichr Queries,0.01994	IFITM3,SLFN5,IFITM1,SAMD9L,IFITM2,TINAGL1,UBE2L6,AHR,IFIT1,PTGS2,ETS1,IFIT3,IFIT2,ICAM1,OASL,LGALS3,CCND2,RGS1,CCL2,PHLDA1,TGM2,SRGN,DUSP5,ANXA1,RSAD2,ANXA2,MX1,IFI44,EMP1,ISG15,PARP14,SORL1,CXCL10,PTPRE,PLSCR1,OAS2,OAS3,S100A6,S100A9,CD44
gene_set_query	68	MTF1	0.02027	ARCHS4 Coexpression,0.02027	SRGN,CD40,RSAD2,MX2,IFI44,IFI35,PTGS2,IFIT3,VAV1,ICAM1,PTPRE,PLSCR1,OAS1,CLEC7A,PSTPIP2,OAS2,KYNU,EPSTI1,TLR4,GBP1,CD44,MYO1G
gene_set_query	69	RFX5	0.02054	GTEx Coexpression,0.02054	APOBEC3C,RTP4,CD40,SP100,SAMD9L,APOBEC3G,PLEKHA2,HVCN1,MX1,IFI35,PARP14,IFI44L,SLFN13,CCND2,OAS2,OAS3,EPSTI1,HLA-DRA,SKAP1,MYO1G
gene_set_query	70	ARNTL	0.02088	ARCHS4 Coexpression,0.02088	SLFN5,HLA-H,SP100,LRRK2,MX2,IKZF1,HLA-A,PIK3R1,ETS1,SORL1,HLA-E,TMEM154,CLEC2B,CLEC7A,INPP5D,ARHGDIB,RAC2,FAS,TLR4,APOL3,MYO1G
gene_set_query	71	ETV3	0.0215	ARCHS4 Coexpression,0.0215	DUSP5,CD40,RSAD2,MX2,EMP1,AHR,PARP14,PTGS2,IFIT3,ICAM1,APOL6,MDFIC,OAS2,LAMP3,KYNU,EPSTI1,HLA-DRA,JAK3,TLR4,GBP1,MYO1G
gene_set_query	72	SIM2	0.02178	GTEx Coexpression,0.02178	CSTA,ANXA1,SAMD9,TTC22,GSTP1,TMPRSS4,SPINK5,TACSTD2,EMP1,FZD10,KRT5,TMPRSS11E,KLK10,KLK11,THSD4,FABP5,KRT15,SFN,SPRR1A,MPZL2
gene_set_query	73	SOX15	0.0224	GTEx Coexpression,0.0224	CSTA,ANXA1,TTC22,GSTP1,SPINK5,IL18,TACSTD2,FZD10,KRT5,KLK10,KLK11,TMEM154,FERMT1,SDR16C5,FABP5,KRT15,SFN,SPRR1A,TP63,MPZL2
gene_set_query	74	IKZF1	0.02273	ARCHS4 Coexpression,0.02273	DENND2D,SLFN5,IL4R,ERAP2,PLEKHA2,MSN,HLA-A,ETS1,SORL1,VAV1,IL27RA,HLA-E,TMEM154,DOCK11,INPP5D,ARHGDIB,RAC2,JAK3,APOL3,MYO1G
gene_set_query	75	NR1H3	0.02279	Enrichr Queries,0.02279	IFITM3,IFITM1,TINAGL1,HFE,UBE2L6,IFIT1,PTGS2,ETS1,IFIT3,PAPSS2,IFIT2,ICAM1,LGALS3,CCND2,GPNMB,ENPP2,CCL2,PHLDA1,PLTP,CTSC,TGM2,NQO1,ANXA1,RSAD2,ANXA2,GPX3,IL18,EMP1,ISG15,PSMB8,ASS1,BST2,CXCL10,MMP14,S100A6,PPARG,S100A9,CD44
gene_set_query	76	BARX2	0.02302	GTEx Coexpression,0.02302	CSTA,ANXA1,TTC22,GSTP1,TMPRSS4,SPINK5,IL18,TACSTD2,EMP1,FZD10,KRT5,TMPRSS11E,KLK10,KLK11,THSD4,FABP5,KRT15,SFN,SPRR1A,MPZL2
gene_set_query	77	SMAD3	0.02357	ReMap ChIP-seq,0.02357	SLFN5,TINAGL1,TACSTD2,ATP10A,IFI35,ICAM1,LGALS3,SERTAD4,CDH3,ARSJ,SFN,TNS4,PHLDA1,SLC16A5,TGM2,DUSP5,ANXA1,IL4R,ANXA2,ITGA2,MYOF,EMP1,ISG15,SORL1,TM4SF1,DKK3,MMP14,CDK6,KRT15,RAB34,S100A6,SPATS2L,CHI3L1,S100P,CD44
gene_set_query	78	GRHL1	0.02365	GTEx Coexpression,0.02365	CSTA,TTC22,GSTP1,SPINK5,IL18,TACSTD2,FZD10,KRT5,KLK10,TMPRSS13,KLK11,TMEM154,SDR16C5,FABP5,KRT15,SFN,SPRR1A,TP63,MPZL2
gene_set_query	79	IKZF2	0.02396	ARCHS4 Coexpression,0.02396	DUSP5,SLFN5,CD40,SH3KBP1,PLEKHA2,HVCN1,MX1,IKZF1,PARP14,NR3C1,ETS1,IFI44L,SLFN13,CDK6,MDFIC,IFI16,OAS2,OAS3,TACC1,MYO1G
gene_set_query	80	ZNF438	0.02422	Enrichr Queries,0.02422	SLFN5,TINAGL1,MCTP1,LRRK2,IFI6,ITPR1,PIK3R1,IFIT1,ETS1,HDAC9,IFIT3,IFIT2,ICAM1,LGALS3,IFI16,EPSTI1,CHST15,PHLDA1,GBP1,GBP4,DUSP5,ANXA1,ANXA3,MYOF,IFI44,PLA2G4A,SORL1,CXCL10,PTPRE,PLSCR1,CDK6,S100A6,KCTD12,XAF1,BCAT1,TLR4,CD44
gene_set_query	81	TET2	0.02427	GTEx Coexpression,0.02427	DENND2D,SRGN,HCP5,MX2,GIMAP2,DAPP1,IKZF1,IL1RAP,ASCL2,VAV1,TMEM71,TMEM154,PYCARD,CLEC7A,PSTPIP2,INPP5D,RAC2,TRIM38,CD44
gene_set_query	82	VDR	0.02439	Literature ChIP-seq,0.02439	SRGN,IFITM1,SP100,RSAD2,IFI6,IFI44,IKZF1,IFIT1,IFI44L,CDK6,LAMP3,EPSTI1,RAC2,TRIM38,CD200
gene_set_query	83	IRF4	0.02457	ARCHS4 Coexpression,0.02457	DUSP5,CD40,SH3KBP1,HVCN1,MX1,IKZF1,HLA-A,NR3C1,ETS1,IFI44L,CCND2,MDFIC,IFI16,OAS2,OAS3,RAC2,HLA-DRA,TACC1,CD200,MYO1G
gene_set_query	84	FOXI2	0.02489	GTEx Coexpression,0.02489	DUSP5,CSTA,ANXA1,SAMD9,TTC22,GSTP1,TMPRSS4,SPINK5,TACSTD2,EMP1,DAPP1,FZD10,TMPRSS11E,KLK10,KLK11,FABP5,SFN,SPRR1A,MPZL2
gene_set_query	85	ASCL2	0.02493	Enrichr Queries,0.02493	IFITM3,IFITM1,TINAGL1,TACSTD2,UBE2L6,IFIT1,PTGS2,ETS1,IFIT3,IFIT2,ICAM1,OASL,LGALS3,CCND2,PHLDA1,GBP4,TGM2,DUSP5,ANXA1,RSAD2,ANXA2,CCL20,MYOF,MX1,IFI44,ISG15,BMP7,BST2,CXCL10,SFRP1,IFI27,OAS1,OAS2,S100A6,PPARG,S100A9,CD44
gene_set_query	86	KLF6	0.02518	ARCHS4 Coexpression,0.02518	SRGN,SP100,ANXA1,IL4R,ERAP2,IKZF1,AHR,HLA-E,PTPRE,CLEC2B,RGS1,CLEC7A,INPP5D,ARHGDIB,RAC2,FXYD5,TRIM38,SP140L,APOL3,MYO1G
gene_set_query	87	ELK3	0.02551	GTEx Coexpression,0.02551	SLFN5,ANXA2,TPM4,HFE,MYOF,ETS1,FBLN2,TM4SF1,MMP14,SLFN11,MDFIC,IFI16,OLFML3,S100A6,KCTD12,CTSC,APOL3,FBN1
gene_set_query	88	SNAI2	0.0258	ARCHS4 Coexpression,0.0258	ANXA2,TPM4,MYOF,ITGA1,FHL2,EMP1,MITF,FBLN1,KRT5,FBLN2,DKK3,GREM1,MMP14,ARSJ,RAB34,ZNF469,IGFBP7,TP63,FBN1
gene_set_query	89	ZNF562	0.02614	GTEx Coexpression,0.02614	CSTA,ANXA1,SAMD9,TTC22,GSTP1,MACC1,TMPRSS4,SPINK5,TACSTD2,EMP1,DAPP1,TMPRSS11E,KLK10,TMEM154,FABP5,SFN,SPRR1A,MPZL2
gene_set_query	90	FOXF1	0.02641	ARCHS4 Coexpression,0.02641	TPM4,ITGA2,MYOF,ITGA1,FHL2,TBX5,THSD4,DKK3,GREM1,SFRP1,MMP14,ARSJ,RAB34,SPATS2L,ZNF469,IGFBP7,PHLDA1,CD44,FBN1
gene_set_query	91	NKX12	0.02676	GTEx Coexpression,0.02676	CSTA,ANXA1,TTC22,GSTP1,SPINK5,IL18,TACSTD2,EMP1,KRT5,TMPRSS11E,KLK10,KLK11,SDR16C5,FABP5,KRT15,SFN,SPRR1A,TP63
gene_set_query	92	RUNX3	0.02694	ReMap ChIP-seq,0.02694	IFITM3,SH3KBP1,SPESP1,ITPR1,IKZF1,IFIT3,NCALD,ICAM1,CCND2,RGS1,INPP5D,ARHGDIB,RAC2,TP63,SNX5,CTSC,DENND2D,SRGN,DUSP5,CCL20,PLEKHA2,MACC1,PARP14,SORL1,VAV1,TMEM154,CDK6,MDFIC,RAB34,FAS,HLA-DRA,SKAP1,CD44,MYO1G
gene_set_query	93	HHEX	0.02707	Enrichr Queries,0.02707	IFITM3,IFITM1,TINAGL1,IKZF1,PTGS2,ETS1,IFIT3,IFIT2,ICAM1,LGALS3,CCND2,OLFML3,INPP5D,ARHGDIB,RAC2,CCL2,PHLDA1,CTSC,TGM2,SRGN,DUSP5,ANXA1,RSAD2,ANXA2,ANXA3,EMP1,SORL1,PSMB8,CXCL10,LPAR6,S100A6,PPARG,KCTD12,FXYD5,S100A9,CD44
gene_set_query	94	TGIF2	0.02738	GTEx Coexpression,0.02738	APOBEC3C,HCP5,CD40,SP100,SAMD9L,APOBEC3G,PLEKHA2,IFI35,PARP14,PSMB8,SLFN13,IFI16,OAS2,HLA-DRA,SP140L,ZNF257,SKAP1,MYO1G
gene_set_query	95	SPIC	0.02778	Enrichr Queries,0.02778	IFITM3,RTP4,IFITM1,CD40,TINAGL1,IKZF1,IFIT1,PTGS2,IFIT3,IFIT2,ICAM1,OASL,LGALS3,GPNMB,RGS1,CLEC7A,INPP5D,RAC2,ENPP2,CCL2,CTSC,GBP4,TGM2,GBP3,SRGN,ANXA1,RSAD2,IFI44,CXCL10,MMP14,OAS2,OAS3,PPARG,DNASE1L3,S100A9,MYO1G
gene_set_query	96	DMRTA2	0.028	GTEx Coexpression,0.028	CSTA,ANXA1,SAMD9,TTC22,GSTP1,TMPRSS4,SPINK5,TACSTD2,EMP1,TMPRSS11E,KLK10,THSD4,FABP5,KRT15,MKRN3,SFN,SPRR1A,MPZL2
gene_set_query	97	NFATC3	0.02826	ARCHS4 Coexpression,0.02826	DENND2D,SLFN5,SP100,ERAP2,PLEKHA2,MSN,IKZF1,ETS1,HLA-E,DOCK11,APOL6,CD8B,INPP5D,ARHGDIB,RAC2,TRIM38,SKAP1,MYO1G
gene_set_query	98	ZNF468	0.02849	Enrichr Queries,0.02849	IFITM1,SP100,SAMD9,IFI6,PIK3R1,IL1RAP,AHR,IFIT1,PTGS2,NR3C1,DDX60,CLDN1,ETS1,IFIT3,IFI44L,CCND2,GPNMB,LAMP3,EPSTI1,CCL2,GBP3,DUSP5,NQO1,ANXA1,ERAP2,ANXA3,ITGA2,EMP1,ISG15,BST2,CXCL10,IFI27,OAS1,KCTD12,CD44
gene_set_query	99	FOSL1	0.02887	ARCHS4 Coexpression,0.02887	DUSP5,ANXA2,TPM4,ITGA2,MYOF,TACSTD2,EMP1,TM4SF1,FERMT1,MMP14,CST1,ARSJ,RAB34,S100A6,SPATS2L,PHLDA1,CD44,TGM2
gene_set_query	100	POU2F2	0.02925	GTEx Coexpression,0.02925	APOBEC3C,HCP5,APOBEC3G,SH3KBP1,HVCN1,MX2,IKZF1,VAV1,PSMB8,IL27RA,OAS2,INPP5D,RAC2,HLA-DRA,JAK3,SKAP1,MYO1G
gene_set_query	101	ZNF655	0.02948	ARCHS4 Coexpression,0.02948	SLFN5,HLA-H,SP100,PLEKHA2,IKZF1,PIK3R1,NR3C1,ETS1,HLA-E,DOCK11,APOL6,CLEC2B,INPP5D,KYNU,ARHGDIB,XAF1,SKAP1,MYO1G
gene_set_query	102	HLX	0.02987	GTEx Coexpression,0.02987	IFITM1,SP100,IFITM2,IL4R,GIMAP2,LY96,VAV1,IL27RA,HLA-E,TMEM71,PLSCR1,ARHGDIB,CHST15,FXYD5,TRIM38,JAK3,TLR4
gene_set_query	103	NFIC	0.0303	ReMap ChIP-seq,0.0303	TINAGL1,TACSTD2,ITPR1,PLAT,IKZF1,IFIT2,RGS1,KYNU,ARHGDIB,SFN,IGF2BP3,TNS4,SNX5,CTSC,SLC16A5,TGM2,DUSP5,ANXA1,ANXA2,ANXA3,CCL20,PLEKHA2,MACC1,MYOF,EMP1,SORL1,TM4SF1,CDK6,KRT15,RAB34,FAS,CD44,MYO1G
gene_set_query	104	RELA	0.03049	Literature ChIP-seq,0.03049	CD40,GSTP1,PTGS2,NR3C1,IFI44L,ICAM1,PYCARD,LGALS3,CCND2,CHST15,NLRP2,IGF2BP1,UGT2A3,CCL2,PHLDA1,GBP1,TP63,SULT1C4,SLC16A5,TGM2,SRGN,DUSP5,NQO1,TPM4,CCL20,AKR1C1,MX1,PLA2G4A,HLA-A,KRT5,KLK10,ASS1,BMP4,CXCL10,CDK6,KRT15,S100A6,FAS,CHI3L1,BCAT1,CD44,MYO1G
gene_set_query	105	JDP2	0.03049	GTEx Coexpression,0.03049	IFITM1,IFITM2,GIMAP2,LY96,IL27RA,DOCK11,SLFN11,IFI16,OLFML3,ARHGDIB,S100A6,FXYD5,TRIM38,SP140L,TLR4,CTSC,FBN1
gene_set_query	106	PPARG	0.03063	Enrichr Queries,0.03063	TINAGL1,FHL2,PLAT,PIK3R1,AHR,PTGS2,NR3C1,ETS1,IFIT3,ICAM1,LGALS3,CCND2,GPNMB,ENPP2,CCL2,PHLDA1,CTSC,TGM2,DUSP5,NQO1,ANXA1,ANXA2,ANXA3,GPX3,MYOF,IL18,EMP1,PLA2G4A,MITF,BMP4,CXCL10,CDK6,S100A6,TLR4,CD44
gene_set_query	107	TCF7	0.03111	GTEx Coexpression,0.03111	DENND2D,HCP5,APOBEC3G,MX2,GIMAP2,IKZF1,HLA-A,VAV1,IL27RA,CD8B,INPP5D,RAC2,FXYD5,SP140L,JAK3,SKAP1,MYO1G
gene_set_query	108	STAT5A	0.03133	ARCHS4 Coexpression,0.03133	CD40,IL4R,MX2,MSN,IKZF1,HLA-A,VAV1,ICAM1,IL27RA,HLA-E,MDFIC,OAS2,INPP5D,EPSTI1,RAC2,PRAME,APOL3,MYO1G
gene_set_query	109	ZNF823	0.03174	GTEx Coexpression,0.03174	CSTA,ANXA1,SAMD9,TTC22,GSTP1,MACC1,TMPRSS4,SPINK5,IL18,TACSTD2,EMP1,TMPRSS11E,KLK10,KLK11,FABP5,SPRR1A,MPZL2
gene_set_query	110	IRF6	0.03194	ARCHS4 Coexpression,0.03194	CSTA,TINAGL1,ITGA2,MYOF,SPINK5,KRT5,CLDN1,KLK10,FERMT1,CDH3,POF1B,KRT15,B3GNT3,SFN,TNS4,SPRR1A,TP63,MPZL2
gene_set_query	111	AKNA	0.03205	Enrichr Queries,0.03205	IFITM3,SLFN5,SP100,SAMD9L,TINAGL1,SH3KBP1,HVCN1,IKZF1,PIK3R1,ETS1,IFIT3,IFIT2,ICAM1,DOCK11,CCND2,RGS1,INPP5D,ARHGDIB,EPSTI1,RAC2,CTSC,SRGN,DUSP5,ANXA1,MSN,PARP14,SORL1,VAV1,PSMB8,CXCL10,PTPRE,ELMO1,FXYD5,CD44,MYO1G
gene_set_query	112	SNAI1	0.03298	GTEx Coexpression,0.03298	IFITM3,TINAGL1,HEXA,MSN,ETS1,TM4SF1,BMP6,ICAM1,DOCK11,PLSCR1,APOL6,SLFN11,CCL2,PPARG,FXYD5,APOL3
gene_set_query	113	ZNF486	0.03348	Enrichr Queries,0.03348	IFITM3,IFITM1,IFITM2,IFI6,DAPP1,SEMA3E,AHR,IFIT1,CLDN1,ETS1,IFI44L,CCND2,GPNMB,IFI16,ARHGDIB,EPSTI1,CHST15,CCL2,IGFBP7,SRGN,ANXA1,ANXA2,ERAP2,MYOF,MX1,IL18,IFI44,EMP1,SORL1,TM4SF1,CXCL10,S100A6,ZNF257,CD44
gene_set_query	114	ZNF436	0.0336	GTEx Coexpression,0.0336	CSTA,TTC22,GSTP1,SPINK5,TACSTD2,FZD10,KRT5,KLK11,FERMT1,CDH3,FABP5,LPAR6,KRT15,SFN,TP63,MPZL2
gene_set_query	115	FOS	0.03367	ReMap ChIP-seq,0.03367	TINAGL1,PLAT,KRT20,CLDN1,LGALS3,KYNU,SFN,TNS4,PLTP,MPZL2,TGM2,DUSP5,ANXA1,IL4R,ANXA2,TPM4,ANXA3,CCL20,PLEKHA2,ITGA2,MACC1,MYOF,EMP1,KRT5,TM4SF1,DKK3,KRT15,RAB34,S100A6,KCTD12,TLR4,DNASE1L3,CD44
gene_set_query	116	TP63	0.03378	ARCHS4 Coexpression,0.03378	CSTA,TINAGL1,ITGA2,MYOF,SPINK5,EMP1,KRT5,CLDN1,KLK10,FERMT1,CDH3,POF1B,KRT15,CLIP4,SFN,TNS4,SPRR1A,MPZL2
gene_set_query	117	TCF12	0.0339	ENCODE ChIP-seq,0.0339	LY6K,SLFN5,TINAGL1,FHL2,IFIT1,IFIT3,OASL,SERTAD4,APOL6,GPNMB,OLFML3,ARSJ,ARHGDIB,CCL2,ST3GAL6,IGF2BP3,GBP4,DUSP5,ANXA1,ANXA2,PLEKHA2,BHMT2,ITGA2,EMP1,XG,FAM133A,CDK6,CLIP4,S100A6,BCAT1
gene_set_query	118	MITF	0.03419	Enrichr Queries,0.03419	TINAGL1,ITPR1,FHL2,PIK3R1,AHR,PTGS2,NR3C1,ETS1,HDAC9,IFIT3,IFIT2,ICAM1,LGALS3,CCND2,GPNMB,ENPP2,CCL2,IGFBP7,PHLDA1,CTSC,TGM2,ANXA1,ANXA2,GPX3,MYOF,EMP1,PLA2G4A,CXCL10,SFRP1,CDK6,PPARG,KCTD12,CD44,FBN1
gene_set_query	119	REL	0.03423	GTEx Coexpression,0.03423	DENND2D,HCP5,CD40,SP100,APOBEC3G,SH3KBP1,MX2,DAPP1,IKZF1,IL27RA,OAS2,INPP5D,RAC2,TRIM38,SKAP1,MYO1G
gene_set_query	120	FOXP3	0.0344	ARCHS4 Coexpression,0.0344	DENND2D,SLFN5,IL4R,ERAP2,MSN,IKZF1,HLA-A,ETS1,PSMB8,IL27RA,HLA-E,RAC2,FAS,JAK3,SKAP1,APOL3,MYO1G
gene_set_query	121	HOXA1	0.03485	GTEx Coexpression,0.03485	CSTA,ANXA1,ANXA2,SAMD9,TTC22,GSTP1,MYOF,TMPRSS4,IL18,TACSTD2,EMP1,DAPP1,KLK10,TMEM154,FABP5,SFN
gene_set_query	122	CREB5	0.0349	Enrichr Queries,0.0349	TINAGL1,PLAT,PIK3R1,AHR,IFIT1,PTGS2,ETS1,HDAC9,IFIT3,IFIT2,ICAM1,LGALS3,CCND2,GPNMB,ENPP2,CCL2,PHLDA1,TGM2,DUSP5,ANXA1,ANXA3,MYOF,EMP1,PLA2G4A,MITF,SORL1,CXCL10,SFRP1,CDK6,KCTD12,BCAT1,TLR4,CD44,FBN1
gene_set_query	123	GLIS3	0.03501	ARCHS4 Coexpression,0.03501	CHST9,ANXA2,AKR1C1,ITGA2,MYOF,IKZF1,CLDN1,TM4SF1,PAPSS2,INPP5D,ARSJ,KYNU,ARHGDIB,RAC2,IGFBP7,CD44,FBN1
gene_set_query	124	KLF8	0.03561	Enrichr Queries,0.03561	SLFN5,IFITM1,SAMD9L,TINAGL1,PIK3R1,AHR,PTGS2,CLDN1,ETS1,FBLN2,HDAC9,NCALD,ICAM1,OASL,CCND2,GPNMB,RGS1,PHLDA1,CTSC,MPZL2,ANXA1,RSAD2,ANXA3,MYOF,EMP1,MITF,SORL1,ASS1,CXCL10,SFRP1,PPARG,XAF1,CD200,CD44
gene_set_query	125	LEF1	0.03624	ARCHS4 Coexpression,0.03624	DENND2D,SLFN5,IL4R,ERAP2,GIMAP2,MSN,IKZF1,HLA-A,ETS1,IL27RA,HLA-E,DOCK11,CD8B,ARHGDIB,RAC2,APOL3,MYO1G
gene_set_query	126	MAFB	0.03632	Enrichr Queries,0.03632	IFITM3,IFITM1,TINAGL1,PIK3R1,IFIT1,PTGS2,ETS1,IFIT3,IFIT2,ICAM1,LGALS3,CCND2,GPNMB,RGS1,ENPP2,CCL2,IGFBP7,PHLDA1,CTSC,TGM2,SRGN,DUSP5,ANXA1,RSAD2,ANXA2,GPX3,EMP1,ISG15,CXCL10,S100A6,KCTD12,S100A9,CD44,FBN1
gene_set_query	127	PPARD	0.03659	Literature ChIP-seq,0.03659	TINAGL1,VSNL1,OLFML3,EPB41L3,ARHGDIB,FHL1,ITPR1,PLA2G4A,PLTP,TMPRSS13,ICAM1
gene_set_query	128	ZBTB38	0.03686	ARCHS4 Coexpression,0.03686	DUSP5,SLFN5,ANXA2,TPM4,ITGA2,MYOF,ITGA1,AHR,NR3C1,GREM1,MDFIC,ARSJ,CLIP4,IGF2BP1,TACC1,GPRC5D,FBN1
gene_set_query	129	TBX21	0.03704	ReMap ChIP-seq,0.03704	IFITM3,SH3KBP1,HFE,HVCN1,IFI6,IKZF1,NR3C1,NCALD,ICAM1,IL27RA,CCND2,RGS1,INPP5D,ARHGDIB,RAC2,PHLDA1,SNX5,CTSC,DENND2D,SRGN,DUSP5,BCHE,TPM4,ERAP2,MACC1,PARP14,SORL1,VAV1,S100A6,DNASE1L3,SKAP1,CD44,MYO1G
gene_set_query	130	KLF5	0.03747	ARCHS4 Coexpression,0.03747	CSTA,TINAGL1,ITGA2,MYOF,TMPRSS4,KRT5,KRT20,KLK10,FERMT1,CDH3,POF1B,B3GNT3,SFN,S100P,TNS4,TP63,MPZL2
gene_set_query	131	KLF2	0.03775	Enrichr Queries,0.03775	IFITM3,IFITM1,SAMD9L,IFITM2,TINAGL1,PTGS2,ETS1,IFIT3,IFIT2,ICAM1,LGALS3,CCND2,RGS1,ARHGDIB,CCL2,IGFBP7,PHLDA1,CTSC,TGM2,SRGN,DUSP5,ANXA1,ANXA2,ANXA3,GPX3,EMP1,MSN,ISG15,CXCL10,S100A6,KCTD12,FXYD5,S100A9,CD44
gene_set_query	132	MEF2B	0.03796	GTEx Coexpression,0.03796	HCP5,IFITM1,APOBEC3G,MX2,GIMAP2,IKZF1,VAV1,PSMB8,IL27RA,PYCARD,INPP5D,ARHGDIB,RAC2,JAK3,SKAP1,MYO1G
gene_set_query	133	NFE2	0.03846	Enrichr Queries,0.03846	IFITM3,IFITM1,IFITM2,TINAGL1,UBE2L6,IKZF1,IFIT1,PTGS2,ETS1,IFIT3,IFIT2,ICAM1,OASL,LGALS3,ARHGDIB,RAC2,CCL2,TGM2,SRGN,ANXA1,RSAD2,ANXA2,ANXA3,MX1,IFI44,ISG15,SORL1,CXCL10,S100A6,PPARG,FXYD5,S100A9,CD44,MYO1G
gene_set_query	134	MBD4	0.03858	GTEx Coexpression,0.03858	SP100,MX2,GIMAP2,LY96,IKZF1,VAV1,PSMB8,IL27RA,PSTPIP2,INPP5D,ARHGDIB,RAC2,TRIM38,SP140L,JAK3
gene_set_query	135	FOXQ1	0.0387	ARCHS4 Coexpression,0.0387	CSTA,TINAGL1,ITGA2,MYOF,TMPRSS4,KLK10,NKD1,BMP4,FERMT1,POF1B,B3GNT3,SPATS2L,S100P,TNS4,TP63,MPZL2,SLC16A5
gene_set_query	136	SETDB2	0.03917	Enrichr Queries,0.03917	IFITM3,RTP4,SLFN5,SP100,SAMD9L,ITPR1,UBE2L6,IFI35,PIK3R1,IFIT1,PTGS2,DDX60,IFIT3,IFIT2,ICAM1,OASL,CCND2,GPNMB,EPSTI1,CTSC,GBP4,GBP3,RSAD2,MX1,IFI44,ISG15,PARP14,CXCL10,CDK6,OAS2,OAS3,KCTD12,XAF1,CD44
gene_set_query	137	TBX4	0.0392	GTEx Coexpression,0.0392	IL4R,LRRK2,ITGA2,MSN,PARP14,PTGS2,PAPSS2,NKD1,ICAM1,HLA-E,LAMP3,SOSTDC1,APOL1,GBP4,GBP3
gene_set_query	138	NRF1	0.03931	ARCHS4 Coexpression,0.03931	IFITM2,IL4R,MX2,MSN,IKZF1,HLA-A,ETS1,VAV1,HLA-E,TMEM154,DOCK11,OAS2,INPP5D,RAC2,JAK3,MYO1G
gene_set_query	139	BCL6B	0.03983	GTEx Coexpression,0.03983	TINAGL1,TCF15,MSN,PARP14,ETS1,TM4SF1,BMP6,ICAM1,SLFN11,IFI27,PPARG,KCTD12,XAF1,APOL3,GBP4
gene_set_query	140	ZNF394	0.03993	ARCHS4 Coexpression,0.03993	SRGN,HLA-H,SP100,GIMAP2,IKZF1,PSMB8,HLA-E,CLEC2B,INPP5D,ARHGDIB,RAC2,TRIM38,XAF1,SP140L,JAK3,MYO1G
gene_set_query	141	ZBTB1	0.04054	ARCHS4 Coexpression,0.04054	SLFN5,SP100,PLEKHA2,MSN,IKZF1,PIK3R1,NR3C1,ETS1,IL27RA,HLA-E,DOCK11,CLEC2B,MDFIC,INPP5D,ARHGDIB,MYO1G
gene_set_query	142	ZBED1	0.0406	Enrichr Queries,0.0406	IFITM3,IFITM1,IFITM2,HFE,IFI6,UBE2L6,IFI35,AHR,IFIT1,IFIT3,LGALS3,GPNMB,IFI16,KYNU,CHST15,CCL2,PHLDA1,GBP1,DUSP5,ANXA1,ANXA2,ERAP2,MYOF,MX1,IFI44,MSN,ISG15,PARP14,PSMB8,BST2,PLSCR1,S100A6,CD44
gene_set_query	143	ZNF750	0.04115	ARCHS4 Coexpression,0.04115	CSTA,SPINK5,EMP1,KRT5,TMPRSS11E,KLK10,TMPRSS13,KLK11,CDH3,POF1B,KRT15,SFN,TNS4,SPRR1A,TP63,MPZL2
gene_set_query	144	RARG	0.04169	GTEx Coexpression,0.04169	TTC22,GSTP1,IL18,TACSTD2,FZD10,KRT5,CLDN1,TMPRSS13,KLK11,TMEM154,SDR16C5,POF1B,KRT15,SFN,TP63
gene_set_query	145	FOXN1	0.04177	ARCHS4 Coexpression,0.04177	CSTA,SPINK5,KRT5,TMPRSS11E,KLK10,TMPRSS13,KLK11,CDH3,POF1B,KRT15,SFN,TNS4,SPRR1A,PLTP,TP63,MPZL2
gene_set_query	146	GRHL2	0.04231	GTEx Coexpression,0.04231	TTC22,IL18,TACSTD2,KRT5,CLDN1,TMPRSS13,KLK11,TMEM154,FERMT1,SDR16C5,POF1B,KRT15,SFN,TNS4,TP63
gene_set_query	147	SPI1	0.04237	ENCODE ChIP-seq,0.04237	IFITM1,SP100,SAMD9L,SAMD9,GIMAP2,DAPP1,LY96,NR3C1,AGPAT4,CLEC7A,INPP5D,KYNU,ARHGDIB,RAC2,PRAME,GBP3,APOBEC3C,DUSP5,HLA-DRB5,ERAP2,MACC1,MYOF,PLA2G4A,VAV1,PSMB8,TMEM154,PLSCR1,OAS1,OAS3,ELMO1,FAS,TRIM38,SP140L,TLR4,GTSF1,MYO1G
gene_set_query	148	BNC1	0.043	ARCHS4 Coexpression,0.043	CSTA,TINAGL1,ANXA2,TPM4,ITGA2,MYOF,KRT5,CCNB3,FERMT1,MMP14,CDH3,KRT15,SFN,TNS4,TP63,MPZL2
gene_set_query	149	ZNF831	0.04356	GTEx Coexpression,0.04356	DENND2D,GIMAP2,IKZF1,HLA-A,VAV1,IL27RA,PTPRE,CD8B,CLEC7A,INPP5D,RAC2,SP140L,JAK3,SKAP1,MYO1G
gene_set_query	150	FOXL1	0.04361	ARCHS4 Coexpression,0.04361	TPM4,ITGA2,MYOF,ITGA1,FHL2,PLAT,THSD4,DKK3,GREM1,MMP14,ARSJ,SPATS2L,ZNF469,IGFBP7,FBN1
gene_set_query	151	SPIB	0.04377	ReMap ChIP-seq,0.04377	CD40,ITPR1,IKZF1,NR3C1,ETS1,TMEM71,CCND2,GPNMB,INPP5D,ARHGDIB,RAC2,CTSC,DENND2D,DUSP5,ERAP2,ITGA2,MX2,MACC1,TMPRSS13,SORL1,VAV1,TMEM154,MDFIC,OAS1,OAS3,TRIM38,CPVL,TLR4,DNASE1L3,CD44,MYO1G
gene_set_query	152	KLF4	0.04416	Enrichr Queries,0.04416	IFITM3,IFITM1,TINAGL1,PIK3R1,AHR,PTGS2,NR3C1,ETS1,IFIT3,IFIT2,ICAM1,LGALS3,CCND2,GPNMB,CCL2,IGFBP7,PHLDA1,TGM2,DUSP5,ANXA1,RSAD2,ANXA2,ANXA3,GPX3,MYOF,EMP1,ISG15,TM4SF1,CXCL10,S100A6,PPARG,KCTD12,CD44
gene_set_query	153	IRX4	0.04418	GTEx Coexpression,0.04418	PPP1R14C,IL18,TACSTD2,FZD10,KRT5,CLDN1,TMPRSS13,KLK11,TMEM154,SDR16C5,POF1B,KRT15,SFN,TNS4,TP63
gene_set_query	154	FOXN2	0.0448	GTEx Coexpression,0.0448	SRGN,MCTP1,SH3KBP1,MX2,IFIT5,GIMAP2,LY96,IKZF1,SORL1,VAV1,CLEC7A,ACER3,ARHGDIB,RAC2,TLR4
gene_set_query	155	RORA	0.04484	ARCHS4 Coexpression,0.04484	SLFN5,HLA-H,SP100,SPINK5,ITPR1,IKZF1,PIK3R1,NR3C1,ETS1,HLA-E,CLEC2B,POF1B,ARHGDIB,CLIP4,SKAP1
gene_set_query	156	EGR2	0.04487	Enrichr Queries,0.04487	IFITM3,TINAGL1,FHL2,PLAT,AHR,IFIT1,PTGS2,ETS1,IFIT3,IFIT2,ICAM1,LGALS3,CCND2,GPNMB,OLFML3,RGS1,ENPP2,CCL2,PHLDA1,TGM2,DUSP5,ANXA1,RSAD2,ANXA3,IFI44,EMP1,ISG15,CXCL10,S100A6,PPARG,S100A9,CD44,MATN2
gene_set_query	157	ZBTB5	0.04543	GTEx Coexpression,0.04543	CSTA,TTC22,GSTP1,MACC1,SPINK5,IL18,TACSTD2,FZD10,KRT5,KLK11,TMEM154,KRT15,SFN,TP63,MPZL2
gene_set_query	158	FOSB	0.04558	Enrichr Queries,0.04558	IFITM3,IFITM1,TINAGL1,PLAT,IFIT1,PTGS2,ETS1,IFIT3,IFIT2,ICAM1,LGALS3,CCND2,GPNMB,RGS1,ENPP2,CCL2,PHLDA1,TGM2,SRGN,DUSP5,ANXA1,RSAD2,ANXA2,ANXA3,CCL20,GPX3,EMP1,ISG15,TM4SF1,CXCL10,S100A6,S100A9,CD44
gene_set_query	159	TCF21	0.04605	GTEx Coexpression,0.04605	SAMD9L,IL4R,ITGA1,MSN,PARP14,TBX5,ETS1,ICAM1,SLFN11,IFI27,APOL1,XAF1,GBP4,SULT1C4,GBP3
gene_set_query	160	KLF3	0.04607	ARCHS4 Coexpression,0.04607	SLFN5,SP100,LRRK2,DAPP1,IKZF1,PIK3R1,ETS1,SORL1,HLA-E,TMEM154,DOCK11,APOL6,CLEC7A,INPP5D,TLR4
gene_set_query	161	STAT6	0.0463	Enrichr Queries,0.0463	IFITM3,IFITM1,IFITM2,TINAGL1,IFI35,PIK3R1,AHR,PTGS2,NR3C1,ETS1,IFIT3,IFIT2,ICAM1,LGALS3,CCND2,ARHGDIB,RAC2,CTSC,TGM2,ANXA1,ANXA2,MYOF,EMP1,MSN,ISG15,PARP14,PSMB8,BST2,CXCL10,MMP14,S100A6,FXYD5,CD44
gene_set_query	162	BCL11B	0.04668	ARCHS4 Coexpression,0.04668	DENND2D,SLFN5,ERAP2,IKZF1,ETS1,SORL1,HLA-E,TMEM154,DOCK11,APOL6,CD8B,RAC2,TRIM38,JAK3,MYO1G
gene_set_query	163	CEBPB	0.04714	ReMap ChIP-seq,0.04714	TINAGL1,IFI35,IL1RAP,LGALS3,APOL6,KYNU,EPSTI1,TNS4,PHLDA1,SNX5,CTSC,SLC16A5,TGM2,ANXA1,ANXA2,TPM4,ANXA3,CCL20,PLEKHA2,MYOF,ITGA1,IL18,EMP1,MITF,TM4SF1,MMP14,RAB34,CLIP4,SPATS2L,S100P,CD44
gene_set_query	164	ZNF426	0.04729	GTEx Coexpression,0.04729	DUSP5,CSTA,ANXA1,SAMD9,TTC22,GSTP1,SPINK5,TACSTD2,EMP1,DAPP1,TMPRSS11E,KLK10,FABP5,SPRR1A,MPZL2
gene_set_query	165	CSRNP1	0.0473	ARCHS4 Coexpression,0.0473	SRGN,DUSP5,IL4R,MX2,HLA-A,AHR,PTGS2,ICAM1,HLA-E,PTPRE,RGS1,CLEC7A,INPP5D,TLR4,MYO1G
gene_set_query	166	ZNF683	0.04772	Enrichr Queries,0.04772	IFITM1,SAMD9L,IFI6,IKZF1,ETS1,IFIT3,IFI44L,IFIT2,OASL,LGALS3,IFI16,RGS1,LAMP3,EPSTI1,CCL2,APOL1,GBP1,GBP4,GBP3,SRGN,DUSP5,RSAD2,APOBEC3G,IFI44,ISG15,CXCL10,CD8B,XIST,XAF1,S100A9,SKAP1,MYO1G
gene_set_query	167	ZNF705A	0.04843	Enrichr Queries,0.04843	IFITM3,SAMD9L,TINAGL1,PTGS2,IFIT3,IFIT2,ICAM1,LGALS3,CCND2,GPNMB,IFI16,OLFML3,RGS1,CLEC7A,ARHGDIB,RAC2,CCL2,PHLDA1,CTSC,GBP4,RSAD2,ANXA3,GPX3,EMP1,PSMB8,CXCL10,MMP14,OAS1,OAS2,S100A9,CD44,CES1
gene_set_query	168	RFX8	0.04853	ARCHS4 Coexpression,0.04853	SRGN,TPM4,SH3KBP1,EMP1,MSN,ATP10A,NR3C1,GREM1,MMP14,CDK6,PSTPIP2,ARSJ,ZNF469,CD44,FBN1
gene_set_query	169	ETV5	0.04914	ARCHS4 Coexpression,0.04914	DENND2D,BCHE,NQO1,GSTP1,TYRP1,MITF,IKZF1,HLA-A,PSMB8,HLA-E,ARHGDIB,RAC2,BCAT1,PHLDA1,MYO1G
gene_set_query	170	ZNF117	0.04915	Enrichr Queries,0.04915	SLFN5,SAMD9L,SAMD9,IFI6,PIK3R1,AHR,IFIT1,PTGS2,DDX60,HDAC9,IFIT3,IFI44L,GPNMB,IFI16,LAMP3,IGFBP7,IGF2BP3,PHLDA1,GBP1,GBP3,DUSP5,ANXA1,IFI44,SORL1,CXCL10,CDK6,OAS2,KCTD12,XAF1,CD44,MATN2,FBN1
gene_set_query	171	TRPS1	0.04916	GTEx Coexpression,0.04916	MYOF,SPINK5,TACSTD2,KRT5,SFRP1,SERTAD4,CDH3,GPNMB,FABP5,LPAR6,KRT15,TP63,CD44,MPZL2
gene_set_query	172	TFDP3	0.04978	GTEx Coexpression,0.04978	MAGEA12,DNAH8,SPESP1,DDX43,OOEP,CCNB3,SAGE1,MAGEA1,PRAME,MAGEA6,MAGEA3,DSCR8,MAGEA4,SSX1
gene_set_query	173	CREB3L1	0.04986	Enrichr Queries,0.04986	IFITM3,TINAGL1,FHL2,PLAT,PTGS2,ETS1,FBLN2,PAPSS2,ICAM1,LGALS3,CCND2,GPNMB,OLFML3,CCL2,IGFBP7,PHLDA1,TGM2,DUSP5,ANXA1,ANXA2,ANXA3,GPX3,MYOF,EMP1,TM4SF1,ASS1,DKK3,CXCL10,MMP14,S100A6,CD44,FBN1
gene_set_query	174	ZNF107	0.0504	GTEx Coexpression,0.0504	DENND2D,HCP5,SP100,SAMD9L,APOBEC3G,DAPP1,IKZF1,PSMB8,SLFN13,OAS2,INPP5D,HLA-DRA,SP140L,MYO1G
gene_set_query	175	MAF	0.05057	Enrichr Queries,0.05057	IFITM3,TINAGL1,PIK3R1,AHR,PTGS2,NR3C1,ETS1,IFIT3,ICAM1,LGALS3,CCND2,GPNMB,OLFML3,CHST15,ENPP2,CCL2,IGFBP7,PHLDA1,CTSC,TGM2,DUSP5,ANXA1,ANXA2,GPX3,EMP1,SORL1,CXCL10,SFRP1,S100A6,KCTD12,CD44,FBN1
gene_set_query	176	STAT3	0.05085	ENCODE ChIP-seq,0.05085	IFITM3,ALG1L,LY6K,UBE2L6,IFI35,IL1RAP,IFIT1,IFIT3,ICAM1,LGALS3,SDR16C5,KYNU,PLS3,CTSC,ANXA1,IL4R,ANXA3,ITGA2,MYOF,IL18,EMP1,TM4SF1,HLA-E,PLSCR1,SLFN11,OAS1,AMTN,DNASE1L3,S100A9,SLFN5,SP100,SAMD9,IFI6,ITPR1,PTGS2,PAPSS2,APOL6,IFI16,IGF2BP3,GBP1,MPZL2,GBP3,NQO1,PLEKHA2,PARP14,PSMB8,TMEM154,BST2,PTPRE,CLEC2B,S100P,SP140L,MYO1G
gene_set_query	177	OSR1	0.05098	ARCHS4 Coexpression,0.05098	TPM4,MYOF,EMP1,FBLN1,FBLN2,THSD4,DKK3,GREM1,MMP14,ARSJ,RAB34,ZNF469,IGFBP7,FBN1
gene_set_query	178	RHOXF2	0.05103	GTEx Coexpression,0.05103	MAGEA12,DNAH8,SPESP1,DDX43,CCNB3,SAGE1,MAGEA1,PRAME,MAGEA6,MAGEA3,GTSF1,DSCR8,MAGEA4,SSX1
gene_set_query	179	EPAS1	0.05128	Enrichr Queries,0.05128	IFITM3,TINAGL1,FHL2,PLAT,PIK3R1,AHR,PTGS2,ETS1,PAPSS2,ICAM1,LGALS3,CCND2,GPNMB,ENPP2,CCL2,IGFBP7,PHLDA1,TGM2,DUSP5,ANXA1,ANXA2,ANXA3,GPX3,MYOF,EMP1,TM4SF1,CXCL10,S100A6,PPARG,KCTD12,CD44,FBN1
gene_set_query	180	FOXC2	0.0516	ARCHS4 Coexpression,0.0516	LY6K,ANXA2,TPM4,MYOF,FHL2,BMP6,THSD4,DKK3,GREM1,MMP14,ARSJ,ZNF469,IGFBP7,FBN1
gene_set_query	181	TRERF1	0.05165	GTEx Coexpression,0.05165	APOBEC3C,DENND2D,CSTA,SAMD9,TTC22,SPINK5,TACSTD2,DAPP1,ASCL2,KLK11,TMEM154,FABP5,KRT15,NLRP2
gene_set_query	182	TWIST2	0.05221	ARCHS4 Coexpression,0.05221	TPM4,MYOF,EMP1,FBLN1,ATP10A,FBLN2,DKK3,XG,GREM1,MMP14,OAF,RAB34,ZNF469,FBN1
gene_set_query	183	ATF3	0.05271	Enrichr Queries,0.05271	IFITM3,IFITM1,TINAGL1,FHL2,IFIT1,PTGS2,ETS1,IFIT3,IFIT2,ICAM1,OASL,LGALS3,CCND2,GPNMB,RGS1,CCL2,PHLDA1,TGM2,SRGN,DUSP5,ANXA1,RSAD2,ANXA2,ANXA3,GPX3,IFI44,EMP1,ISG15,CXCL10,OAS2,S100A6,CD44
gene_set_query	184	TLX1	0.05289	GTEx Coexpression,0.05289	DENND2D,HCP5,ANKDD1A,SAMD9L,CD163L1,SEMA3D,IKZF1,SLFN13,PSTPIP2,INPP5D,SP140L,CPVL,JAK3,DNASE1L3
gene_set_query	185	ZNF415	0.05342	Enrichr Queries,0.05342	SAMD9L,SAMD9,IFI6,PLAT,PIK3R1,IFIT1,PTGS2,NR3C1,HDAC9,IFIT3,IFI44L,IFIT2,CCND2,GPNMB,OLFML3,LAMP3,EPB41L3,ENPP2,CCL2,ANXA1,GPX3,ITGA2,MX1,IFI44,BST2,BMP4,CXCL10,SFRP1,IFI27,OAS1,XAF1,MATN2
gene_set_query	186	PRRX2	0.05344	ARCHS4 Coexpression,0.05344	IFITM3,TPM4,MYOF,FHL2,FBLN1,ATP10A,FBLN2,DKK3,GREM1,MMP14,ARSJ,RAB34,ZNF469,FBN1
gene_set_query	187	EOMES	0.05387	ReMap ChIP-seq,0.05387	GALNT12,RGS13,LAMA1,SEMA3E,ETS1,FBLN2,RGS1,EPB41L3,CCL2,IGF2BP3,CSMD3,TNS4,PITX2,PHLDA1,APOL3,SLC16A5,DENND2D,DUSP5,ITGA1,MITF,DKK3,TMEM154,SFRP1,FABP5,KRT15,RAB34,SLC9A9,XIST,BCAT1,DNASE1L3
gene_set_query	188	RARB	0.05405	ARCHS4 Coexpression,0.05405	KRT222,WDR72,SEMA3E,IKZF1,HLA-E,ANO3,ARHGDIB,SLCO1B3,RAC2,RGN,PLS3,FXYD5,PITX2,MYO1G
gene_set_query	189	FOXR1	0.05476	GTEx Coexpression,0.05476	DNAH8,SPESP1,DDX43,OOEP,CCNB3,SAGE1,MAGEA1,PRAME,MAGEA6,MAGEA3,GTSF1,DSCR8,MAGEA4,SSX1
gene_set_query	190	FOXM1	0.05488	Literature ChIP-seq,0.05488	GALNT12,LRRK2,AHR,KRT20,NR3C1,CLDN1,LGALS3,CDH3,POF1B,RGS1,LAMP3,KYNU,SOSTDC1,TP63,ZYG11A,ANXA1,ANXA2,ANXA3,ITGA2,SPINK5,EMP1,PLA2G4A,MITF,TMPRSS11E,TM4SF1,COL2A1,MDFIC,MPPED2,CLIP4,ELMO1,PPARG,CSTA,SP100,SEMA3D,TMPRSS4,ITPR1,SEMA3E,PIK3R1,PAPSS2,THSD4,ARSJ,CHST15,CSMD3,DSCR8,BCHE,NQO1,MX1,CDK6,SPATS2L,TACC1
gene_set_query	191	IRX5	0.05538	GTEx Coexpression,0.05538	PPP1R14C,IL18,TACSTD2,KRT5,CLDN1,TMPRSS13,KLK11,XG,SDR16C5,POF1B,GPNMB,KRT15,TNS4,TP63
gene_set_query	192	RUNX1	0.05627	Enrichr Queries,0.05627	TINAGL1,FHL2,IKZF1,PIK3R1,AHR,PTGS2,NR3C1,ETS1,ICAM1,LGALS3,CCND2,INPP5D,RAC2,CCL2,PHLDA1,CTSC,TGM2,DUSP5,ANXA1,ANXA2,MYOF,EMP1,CXCL10,PTPRE,MMP14,CDK6,S100A6,PPARG,FXYD5,CD44,FBN1
gene_set_query	193	ARID5A	0.05651	ARCHS4 Coexpression,0.05651	HLA-H,IL4R,MX2,IKZF1,IFI35,HLA-A,VAV1,ICAM1,HLA-E,INPP5D,RAC2,FXYD5,APOL3,MYO1G
gene_set_query	194	ETV3L	0.05713	ARCHS4 Coexpression,0.05713	CD40,RSAD2,CCL20,IFI44,ISG15,IFI35,PTGS2,ICAM1,PLSCR1,PSTPIP2,KYNU,EPB41L3,CNGB3,MATN2
gene_set_query	195	BHLHE40	0.05725	GTEx Coexpression,0.05725	DUSP5,TTC22,TACSTD2,FZD10,KRT5,TM4SF1,KLK11,THSD4,FABP5,LPAR6,KRT15,SFN,TP63,MPZL2
gene_set_query	196	ETS2	0.05769	Enrichr Queries,0.05769	IFITM3,IFITM2,TINAGL1,FHL2,PIK3R1,AHR,PTGS2,NR3C1,ETS1,IFIT3,IFIT2,ICAM1,LGALS3,CCND2,CCL2,PHLDA1,CTSC,TGM2,SRGN,DUSP5,ANXA1,ANXA2,ANXA3,GPX3,EMP1,SORL1,TM4SF1,CXCL10,PLSCR1,S100A6,CD44
gene_set_query	197	ZEB2	0.05774	ARCHS4 Coexpression,0.05774	SRGN,MCTP1,LRRK2,PIK3R1,AHR,DOCK11,PTPRE,APOL6,CLEC7A,EPB41L3,KCTD12,TRIM38,XAF1,TLR4
gene_set_query	198	TFCP2L1	0.05835	ARCHS4 Coexpression,0.05835	TINAGL1,MYOF,TMPRSS4,KRT5,KRT20,CDH3,POF1B,KRT15,B3GNT3,NLRP2,S100P,TNS4,TP63,MPZL2
gene_set_query	199	MAFF	0.0584	Enrichr Queries,0.0584	IFITM3,TINAGL1,FHL2,PLAT,IFIT1,PTGS2,ETS1,IFIT3,IFIT2,ICAM1,LGALS3,CCND2,GPNMB,RGS1,CCL2,PHLDA1,TGM2,SRGN,DUSP5,ANXA1,RSAD2,ANXA2,ANXA3,CCL20,EMP1,ISG15,TM4SF1,CXCL10,S100A6,S100A9,CD44
gene_set_query	200	KLF7	0.05849	GTEx Coexpression,0.05849	SP100,TPM4,ITGA1,IFIT5,MSN,ETS1,BMP6,DOCK11,SLFN11,S100A6,TACC1,KCTD12,APOL3
gene_set_query	201	JUND	0.05932	ENCODE ChIP-seq,0.05932	LY6K,TINAGL1,ANXA1,SAMD9,ANXA3,ITGA2,MACC1,EMP1,DAPP1,KRT5,PTPRE,SDR16C5,KRT15,CNGB3,PHLDA1
gene_set_query	202	AHRR	0.05958	ARCHS4 Coexpression,0.05958	CD40,TPM4,CD163L1,MYOF,MSN,ATP10A,ICAM1,GREM1,MMP14,MDFIC,GPNMB,ZNF469,FBN1,MYO1G
gene_set_query	203	TBXT	0.05974	GTEx Coexpression,0.05974	APOBEC3C,CD40,APOBEC3G,SH3KBP1,HVCN1,GINS4,MX1,IFI44L,OAS2,OAS3,HLA-DRA,ZNF257,SKAP1
gene_set_query	204	ZNF671	0.05983	Enrichr Queries,0.05983	SLFN5,CD40,SAMD9,HFE,IFI6,IKZF1,IFIT1,NR3C1,ETS1,IFIT3,IFIT2,ICAM1,CCND2,GPNMB,IFI16,LAMP3,EPB41L3,CHST15,CCL2,TGM2,DUSP5,ANXA1,RSAD2,MX1,IFI44,PARP14,BST2,CXCL10,KCTD12,XAF1,MATN2
gene_set_query	205	GLIS1	0.0602	ARCHS4 Coexpression,0.0602	TPM4,MYOF,FHL2,FBLN1,FBLN2,DKK3,GREM1,MMP14,ARSJ,S100A6,ZNF469,IGFBP7,FBN1
gene_set_query	206	PRDM9	0.06036	GTEx Coexpression,0.06036	DNAH8,SPESP1,DDX43,CCNB3,SAGE1,MAGEA1,PRAME,MAGEA6,MAGEA3,GTSF1,DSCR8,MAGEA4,SSX1
gene_set_query	207	FOXO1	0.06061	ReMap ChIP-seq,0.06061	SP100,TINAGL1,RGS13,FHL2,PLAT,FBLN1,ETS1,IFIT2,RGS1,INPP5D,KYNU,ARHGDIB,CHST15,TNS4,SNX5,DENND2D,IL4R,ANXA2,PLEKHA2,MACC1,MYOF,GINS4,MITF,SORL1,TM4SF1,MMP14,MDFIC,LPCAT2,TACC1,MYO1G
gene_set_query	208	CTCFL	0.06098	GTEx Coexpression,0.06098	DNAH8,SPESP1,DDX43,CCNB3,SAGE1,MAGEA1,PRAME,MAGEA6,MAGEA3,GTSF1,DSCR8,MAGEA4,SSX1
gene_set_query	209	LYL1	0.06125	Enrichr Queries,0.06125	IFITM3,IFITM1,IFITM2,TINAGL1,IKZF1,ETS1,IFIT3,ICAM1,PYCARD,LGALS3,CCND2,CLEC7A,INPP5D,ARHGDIB,RAC2,CTSC,TGM2,SRGN,ANXA1,ANXA2,MSN,ISG15,VAV1,BST2,CXCL10,S100A6,KCTD12,FXYD5,S100A9,CD44,MYO1G
gene_set_query	210	HIF1A	0.06143	ARCHS4 Coexpression,0.06143	ANXA2,TPM4,ITGA2,MYOF,AHR,PTGS2,GREM1,MMP14,ARSJ,PLS3,TACC1,CD44,FBN1
gene_set_query	211	ANHX	0.06161	GTEx Coexpression,0.06161	DNAH8,SPESP1,DDX43,CCNB3,SAGE1,MAGEA1,PRAME,MAGEA6,MAGEA3,GTSF1,DSCR8,MAGEA4,SSX1
gene_set_query	212	MBD2	0.06204	ARCHS4 Coexpression,0.06204	SLFN5,IL4R,SH3KBP1,PLEKHA2,MSN,IKZF1,HLA-A,ETS1,APOL6,MDFIC,OAS2,TLR4,MYO1G
gene_set_query	213	HES1	0.06223	GTEx Coexpression,0.06223	PPP1R14C,IL18,TACSTD2,FZD10,KRT5,CLDN1,TMPRSS13,KLK11,POF1B,KRT15,SFN,TNS4,TP63
gene_set_query	214	OSR2	0.06268	Enrichr Queries,0.06268	IFITM1,TINAGL1,FHL2,PLAT,FBLN1,IFIT1,PTGS2,FBLN2,IFIT3,LGALS3,GPNMB,OLFML3,ENPP2,CCL2,PITX2,PHLDA1,TGM2,ANXA1,ANXA3,GPX3,EMP1,MITF,BMP4,GREM1,CXCL10,SFRP1,PPARG,KCTD12,MATN2,FBN1
gene_set_query	215	ZNF80	0.06285	GTEx Coexpression,0.06285	DENND2D,GIMAP2,IKZF1,HLA-A,VAV1,IL27RA,CD8B,INPP5D,RAC2,FXYD5,SP140L,SKAP1,MYO1G
gene_set_query	216	FOXR2	0.06327	ARCHS4 Coexpression,0.06327	CRISP2,MAGEA12,ITGA1,CSAG2,MAGEA2B,CSAG1,SAGE1,OAF,MAGEA1,IL13RA2,MAGEA6,MAGEA3,MAGEA4
gene_set_query	217	ZNF439	0.06339	Enrichr Queries,0.06339	IFITM1,SAMD9L,SAMD9,IFI6,AHR,IFIT1,PTGS2,ETS1,IFIT3,IFI44L,IFIT2,CCND2,ARHGDIB,EPSTI1,CCL2,PHLDA1,GBP1,GBP3,SRGN,DUSP5,ANXA1,MX1,IFI44,SORL1,BST2,CXCL10,OAS1,KCTD12,XAF1,CD44
gene_set_query	218	STAT5B	0.06388	ARCHS4 Coexpression,0.06388	IFITM2,IL4R,MSN,IKZF1,HLA-A,ETS1,SORL1,HLA-E,CHST15,RAC2,TLR4,S100A9,MYO1G
gene_set_query	219	ZZZ3	0.06397	ReMap ChIP-seq,0.06397	DENND2D,IL4R,ANXA2,GPX3,PLS3,PPARG,CPVL,GBP1,IFIT3,IFIT2,GBP3
gene_set_query	220	TFAP2C	0.06409	GTEx Coexpression,0.06409	IL18,TACSTD2,KRT5,CLDN1,TMPRSS13,KLK11,TMEM154,SDR16C5,POF1B,KRT15,SFN,TNS4,TP63
gene_set_query	221	ZNF641	0.0645	ARCHS4 Coexpression,0.0645	IFITM2,LRRK2,MX2,IKZF1,HLA-A,SORL1,VAV1,HLA-E,TMEM154,CLEC7A,CHST15,TLR4,S100A9
gene_set_query	222	GATA3	0.06481	Enrichr Queries,0.06481	IFITM3,IFITM1,TINAGL1,TACSTD2,FHL2,PIK3R1,AHR,PTGS2,NR3C1,ETS1,ICAM1,LGALS3,CCND2,ARHGDIB,CCL2,PHLDA1,TGM2,DUSP5,ANXA1,ANXA2,ANXA3,EMP1,ASS1,BMP4,CXCL10,SFRP1,CDK6,S100A6,PPARG,CD44
gene_set_query	223	ZNF385A	0.06534	GTEx Coexpression,0.06534	PPP1R14C,IL18,KRT5,CLDN1,BMP7,TMPRSS13,KLK11,TMEM154,SDR16C5,POF1B,SFN,TNS4,TP63
gene_set_query	224	GTF2IRD1	0.06572	ARCHS4 Coexpression,0.06572	SRGN,SH3KBP1,MSN,IKZF1,HLA-A,ETS1,HLA-E,GJC1,ARHGDIB,RAC2,TLR4,APOL3,MYO1G
gene_set_query	225	USF1	0.06596	GTEx Coexpression,0.06596	GIMAP2,IKZF1,HLA-A,VAV1,IL27RA,HLA-E,CLEC7A,PSTPIP2,INPP5D,ARHGDIB,RAC2,SP140L,JAK3
gene_set_query	226	OVOL1	0.06695	ARCHS4 Coexpression,0.06695	CSTA,TINAGL1,SPINK5,KLK10,TMPRSS13,CDH3,POF1B,B3GNT3,NLRP2,SFN,S100P,SPRR1A,TP63
gene_set_query	227	HNF1B	0.06734	ReMap ChIP-seq,0.06734	TINAGL1,GDA,HFE,IFIT3,SULT1C2,RGS1,ARSJ,KYNU,PLS3,TNS4,SULT1C4,MPZL2,TGM2,DUSP5,ANXA1,ANXA2,ERAP2,ANXA3,ITGA2,MACC1,MYOF,SPINK5,ITGA1,IL18,TM4SF1,KRT15,CLIP4,SPATS2L,BCAT1
gene_set_query	228	TFAP2A	0.06766	Enrichr Queries,0.06766	TINAGL1,TACSTD2,FHL2,AHR,PTGS2,NR3C1,CLDN1,ETS1,ICAM1,LGALS3,CCND2,GPNMB,CCL2,PITX2,PHLDA1,TGM2,ANXA1,ANXA2,ITGA2,MYOF,EMP1,PLA2G4A,MITF,TM4SF1,BMP4,CXCL10,SFRP1,CDK6,PPARG,CD44
gene_set_query	229	POU2AF1	0.06783	GTEx Coexpression,0.06783	CD40,APOBEC3G,SH3KBP1,HVCN1,GINS4,MX1,IFI44L,SLFN13,OAS1,OAS2,OAS3,HLA-DRA,MYO1G
gene_set_query	230	ZNF558	0.06838	Enrichr Queries,0.06838	IFITM3,SLFN5,IFITM1,TINAGL1,MCTP1,IFI6,PIK3R1,IFIT1,PTGS2,DDX60,ETS1,IFIT3,IFI44L,IFIT2,ICAM1,GPNMB,IFI16,CCL2,PHLDA1,DUSP5,ANXA1,IFI44,EMP1,SORL1,ASS1,CXCL10,OAS1,XAF1,CD44,MATN2
gene_set_query	231	ARID3A	0.06845	GTEx Coexpression,0.06845	SRGN,APOBEC3G,HVCN1,MX2,GIMAP2,IKZF1,VAV1,IL27RA,ARHGDIB,RAC2,JAK3,SKAP1,MYO1G
gene_set_query	232	HOXB2	0.0688	ARCHS4 Coexpression,0.0688	APOBEC3C,HLA-H,TPM4,MSN,IL27RA,BST2,CLEC2B,ARHGDIB,RAC2,PRAME,FXYD5,SKAP1,SSX1
gene_set_query	233	TFAP2B	0.06907	GTEx Coexpression,0.06907	IL18,TACSTD2,KRT5,TMPRSS13,KLK11,TMEM154,SDR16C5,SFRP1,POF1B,KRT15,SFN,TNS4,TP63
gene_set_query	234	TWIST1	0.06909	Enrichr Queries,0.06909	IFITM3,IFITM1,TINAGL1,FHL2,PLAT,FBLN1,AHR,PTGS2,ETS1,FBLN2,CCND2,GPNMB,OLFML3,ENPP2,CCL2,IGFBP7,PITX2,PHLDA1,ANXA1,ANXA2,EMP1,DKK3,BMP4,GREM1,CXCL10,SFRP1,PPARG,KCTD12,CD44,FBN1
gene_set_query	235	PHF21A	0.06941	ARCHS4 Coexpression,0.06941	IFITM2,IL4R,LRRK2,MX2,HLA-A,SORL1,HLA-E,TMEM154,CLEC7A,CHST15,RAC2,TLR4,S100A9
gene_set_query	236	TFE3	0.0697	GTEx Coexpression,0.0697	IFITM3,IFITM2,IL4R,LY96,MSN,VAV1,HLA-E,DOCK11,CLEC7A,RAB34,CHST15,FXYD5,TLR4
gene_set_query	237	ATF5	0.0698	Enrichr Queries,0.0698	IFITM3,IFITM2,TINAGL1,IFI35,PTGS2,IFIT3,IFIT2,ICAM1,LGALS3,CCND2,GPNMB,CCL2,PHLDA1,CTSC,TGM2,DUSP5,NQO1,ANXA1,RSAD2,ANXA2,ANXA3,GPX3,EMP1,ISG15,PSMB8,ASS1,BST2,CXCL10,S100A6,CD44
gene_set_query	238	TFEB	0.07002	ARCHS4 Coexpression,0.07002	IFITM2,IL4R,HVCN1,MX2,HLA-A,VAV1,HLA-E,CLEC7A,INPP5D,CHST15,RAC2,S100A9,MYO1G
gene_set_query	239	FOXC1	0.07051	Enrichr Queries,0.07051	IFITM3,TINAGL1,FHL2,PLAT,PTGS2,ETS1,LGALS3,CCND2,OLFML3,CCL2,IGFBP7,PHLDA1,TGM2,DUSP5,ANXA1,ANXA2,ANXA3,MYOF,EMP1,TM4SF1,DKK3,BMP4,CXCL10,SFRP1,CDK6,S100A6,PPARG,KCTD12,CD44,FBN1
gene_set_query	240	NFATC1	0.07064	ARCHS4 Coexpression,0.07064	CD40,IL4R,MSN,IKZF1,HLA-A,ETS1,VAV1,HLA-E,PTPRE,INPP5D,ARHGDIB,RAC2,MYO1G
gene_set_query	241	PCGF2	0.07071	ReMap ChIP-seq,0.07071	MCTP1,LAMA1,SPESP1,PTPRO,SEMA3E,RORB,HDAC9,HS6ST3,CCND2,LAMP3,PRDM16,IGF2BP1,IGF2BP3,CSMD3,PITX2,KRT222,PPP1R14C,PAX3,BMP7,SLFN13,CXCL10,COL2A1,CDK6,VSNL1,MPPED2,DNASE1L3,GTSF1,SKAP1,CD200
gene_set_query	242	TAL1	0.07094	GTEx Coexpression,0.07094	ANXA3,GIMAP2,MSN,ETS1,VAV1,IL27RA,HLA-E,TMEM71,PTPRE,CLEC7A,FXYD5,TLR4,APOL3
gene_set_query	243	NPAS2	0.07125	ARCHS4 Coexpression,0.07125	TINAGL1,ITGA2,MYOF,ITGA1,FHL2,IKZF1,OAF,RAC2,B3GNT3,SPATS2L,PPARG,PHLDA1,MYO1G
gene_set_query	244	MEOX2	0.07187	ARCHS4 Coexpression,0.07187	ANXA1,FHL1,ITGA1,PNMA5,EMP1,FBLN2,SERTAD4,SOSTDC1,KCTD12,IL13RA2,MAGEA4,FBN1
gene_set_query	245	TPRX1	0.07218	GTEx Coexpression,0.07218	DNAH8,SPESP1,DDX43,CCNB3,SAGE1,MAGEA1,PRAME,MAGEA6,MAGEA3,GTSF1,DSCR8,MAGEA4,SSX1
gene_set_query	246	CEBPA	0.07265	Enrichr Queries,0.07265	IFITM3,TINAGL1,FHL2,PIK3R1,PTGS2,NR3C1,ETS1,ICAM1,LGALS3,CCND2,GPNMB,RAC2,CCL2,IGFBP7,PHLDA1,PLTP,CTSC,TGM2,DUSP5,ANXA1,ANXA2,GPX3,EMP1,PSMB8,CXCL10,S100A6,PPARG,KCTD12,S100A9,CD44
gene_set_query	247	ZNF800	0.0731	ARCHS4 Coexpression,0.0731	SLFN5,SP100,IFIT5,IKZF1,AHR,NR3C1,ETS1,DOCK11,APOL6,CLEC2B,MDFIC,MYO1G
gene_set_query	248	MTF2	0.07317	Literature ChIP-seq,0.07317	GALNT12,GALNT14,MCTP1,CPNE5,GDA,NRK,LRRK2,PTPRO,FHL2,HTR2C,FZD10,IKZF1,RORB,NR3C1,HS6ST3,LGALS3,CCND2,CDH3,TNS4,PITX2,PHLDA1,DENND2D,DUSP5,BHMT2,ITGA1,PAX3,ANO5,VAV1,GREM1,CLDN10,SFRP1,MMP14,COL2A1,MDFIC,OAF,CLIP4,PPARG,KCTD12,SEMA3D,TACSTD2,ATP10A,ASCL2,NKD1,NCALD,SERTAD4,EPB41L3,PRDM16,SLITRK3,ST3GAL6,IGFBP7,CSMD3,TRPM6,PPP1R14C,PLEKHA2,ISG15,TBX5,BMP7,PSMB8,BMP6,ASS1,BMP4,FERMT1,PTPRE,CDK6,FXY…
gene_set_query	249	HIC1	0.07343	GTEx Coexpression,0.07343	TCF15,ETS1,FBLN2,BST2,BMP4,SLFN11,MDFIC,OLFML3,RAB34,XAF1,APOL3,MATN2
gene_set_query	250	HOXB7	0.07371	ARCHS4 Coexpression,0.07371	NQO1,LY6K,MAGEA12,ANXA2,FHL2,CSAG1,BMP4,FERMT1,SPATS2L,PPARG,MAGEA6,MAGEA3
gene_set_query	251	LHX2	0.07407	ReMap ChIP-seq,0.07407	IFIT5,AHR,PAPSS2,IFIT2,RGS1,CCL2,ST3GAL6,IGFBP7,IL13RA2,PHLDA1,CTSC,FAM9B,ANXA1,ANXA2,CCL20,MYOF,ITGA1,IL18,MITF,TM4SF1,KRT15,CLIP4,CNGB3,PPARG,GPRC5D,BCAT1,TLR4,CD44
gene_set_query	252	DMRT1	0.07467	GTEx Coexpression,0.07467	DNAH8,SPESP1,DDX43,CCNB3,SAGE1,MAGEA1,PRAME,MAGEA6,MAGEA3,GTSF1,DSCR8,MAGEA4
gene_set_query	253	ZNF101	0.07479	Enrichr Queries,0.07479	SLFN5,IFITM1,SAMD9L,IFITM2,SAMD9,IFI6,GIMAP2,IKZF1,NR3C1,ETS1,IFIT3,IFI44L,OASL,APOL6,IFI16,LAMP3,EPSTI1,GBP1,CTSC,GBP4,SRGN,DUSP5,APOBEC3G,MX2,MX1,IFI44,BST2,CXCL10,PLSCR1
gene_set_query	254	RHOXF2B	0.0753	GTEx Coexpression,0.0753	MAGEA12,DNAH8,DDX43,CCNB3,SAGE1,MAGEA1,PRAME,MAGEA6,MAGEA3,DSCR8,MAGEA4,SSX1
gene_set_query	255	ZNF595	0.0755	Enrichr Queries,0.0755	TINAGL1,MCTP1,IFI6,ITPR1,PIK3R1,ETS1,HDAC9,IFIT3,IFI44L,IFIT2,GPNMB,IFI16,LAMP3,CCL2,PHLDA1,DUSP5,ANXA1,RSAD2,ERAP2,IFI44,SORL1,ASS1,CXCL10,CDK6,OAS1,OAS2,OAS3,BCAT1,CPVL
gene_set_query	256	ZNF404	0.07621	Enrichr Queries,0.07621	SLFN5,SAMD9L,TINAGL1,SAMD9,IFI6,FHL2,IFIT1,PTGS2,DDX60,CLDN1,IFIT3,IFI44L,IFIT2,GPNMB,LAMP3,CCL2,IGFBP7,PHLDA1,GBP1,TGM2,GBP3,DUSP5,BCHE,ANXA1,CCL20,IFI44,EMP1,CXCL10,XAF1
gene_set_query	257	CBX2	0.07627	ENCODE ChIP-seq,0.07627	MCTP1,DNAH8,TMPRSS4,FHL1,ITPR1,FHL2,UBE2L6,PTGS2,FBLN2,HDAC9,NCALD,HS6ST3,OASL,CKMT2,LGALS3,SERTAD4,CDH3,EPSTI1,ST3GAL6,PRAME,TRPM6,APOL3,MPZL2,PPP1R14C,ANXA3,ITGA2,MYOF,EMP1,PAX3,OOEP,DKK3,XG,GREM1,SLFN11,ARMCX2,CDK6,VSNL1,OAS1,OAF,OAS2,OAS3,AMTN,MKRN3,CHI3L1,PPARG,TACC1,SMTNL2
gene_set_query	258	PRDM14	0.07654	GTEx Coexpression,0.07654	MAGEA12,DNAH8,DDX43,CCNB3,SAGE1,MAGEA1,PRAME,MAGEA6,MAGEA3,DSCR8,MAGEA4,SSX1
gene_set_query	259	ZNF366	0.07692	Enrichr Queries,0.07692	TINAGL1,LRRK2,PIK3R1,AHR,NR3C1,ETS1,IFIT3,IFI44L,ICAM1,IFI16,ARHGDIB,ENPP2,CCL2,GBP4,TGM2,RSAD2,MYOF,ITGA1,EMP1,CXCL10,PTPRE,OAS2,SLC9A9,PPARG,KCTD12,XAF1,TLR4,CD44,FBN1
gene_set_query	260	GFI1	0.0774	ARCHS4 Coexpression,0.0774	SRGN,SH3KBP1,MSN,IKZF1,HLA-A,ETS1,VAV1,TMEM71,INPP5D,ARHGDIB,RAC2,MYO1G
gene_set_query	261	PRRX1	0.07764	Enrichr Queries,0.07764	IFITM3,TINAGL1,FHL2,PLAT,FBLN1,PTGS2,ETS1,FBLN2,CCND2,GPNMB,OLFML3,ENPP2,CCL2,IGFBP7,TGM2,ANXA1,ANXA2,MYOF,EMP1,TM4SF1,DKK3,GREM1,CXCL10,SFRP1,MMP14,S100A6,CD44,MATN2,FBN1
gene_set_query	262	ZNF618	0.07835	Enrichr Queries,0.07835	SLFN5,SAMD9L,IFI6,ITPR1,IFIT1,DDX60,ETS1,HDAC9,IFIT3,IFIT2,EPSTI1,IGF2BP1,GBP1,DUSP5,RSAD2,MYOF,MX1,IFI44,PARP14,SORL1,CXCL10,CDK6,OAS1,OAS3,SPATS2L,KCTD12,XAF1,BCAT1,CD44
gene_set_query	263	NR4A3	0.07862	ARCHS4 Coexpression,0.07862	SRGN,DUSP5,HLA-DRB5,IL18,PTGS2,ICAM1,PTPRE,RGS1,CLEC7A,LPCAT2,HLA-DRA,CCL2
gene_set_query	264	SATB1	0.07924	ARCHS4 Coexpression,0.07924	SLFN5,ANXA2,ERAP2,MYOF,GIMAP2,IKZF1,PIK3R1,ETS1,DOCK11,RAC2,JAK3,MYO1G
gene_set_query	265	GLMP	0.07985	ARCHS4 Coexpression,0.07985	NQO1,CD163L1,GSTP1,HEXA,TYRP1,MITF,ICAM1,LGALS3,MMP14,GPNMB,RAB34,CPVL
gene_set_query	266	ZNF99	0.08027	GTEx Coexpression,0.08027	DNAH8,SPESP1,DDX43,CCNB3,SAGE1,MAGEA1,PRAME,MAGEA6,MAGEA3,DSCR8,MAGEA4,SSX1
gene_set_query	267	HAND1	0.08047	ARCHS4 Coexpression,0.08047	ANXA3,LAMA1,BMP4,CLDN10,CDH3,ARMCX2,FABP5,NLRP2,IGF2BP1,PLS3,SMTNL2,PITX2
gene_set_query	268	HOXB6	0.08048	Enrichr Queries,0.08048	TINAGL1,FHL2,PLAT,FBLN1,PTGS2,ETS1,IFIT3,IFIT2,LGALS3,CCND2,CCL2,IGFBP7,PITX2,PHLDA1,TGM2,DUSP5,ANXA1,ANXA3,MYOF,EMP1,TM4SF1,BST2,BMP4,CXCL10,SFRP1,S100A6,PPARG,CD44,FBN1
gene_set_query	269	FOXN3	0.08108	ARCHS4 Coexpression,0.08108	FHL1,IKZF1,PIK3R1,ETS1,SORL1,CKMT2,DOCK11,APOL6,MDFIC,INPP5D,TACC1,SMTNL2
gene_set_query	270	ZSCAN5B	0.08214	GTEx Coexpression,0.08214	MAGEA12,DDX43,CCNB3,FAM133A,SAGE1,MAGEA1,PRAME,MAGEA6,MAGEA3,DSCR8,MAGEA4,SSX1
gene_set_query	271	BCL6	0.08231	ARCHS4 Coexpression,0.08231	IFITM2,IL4R,LRRK2,MX2,HLA-A,SORL1,HLA-E,TMEM154,CLEC7A,CHST15,TLR4,S100A9
gene_set_query	272	ZNF442	0.08262	Enrichr Queries,0.08262	IFITM3,RTP4,SLFN5,SAMD9L,TINAGL1,IFI6,LY96,IFIT1,PTGS2,DDX60,IFIT3,IFI44L,IFIT2,ICAM1,OASL,CCND2,GPNMB,EPSTI1,ENPP2,PHLDA1,DUSP5,RSAD2,ANXA3,GPX3,IFI44,CXCL10,CDK6,OAS1,XAF1
gene_set_query	273	PAX5	0.08276	GTEx Coexpression,0.08276	APOBEC3C,CD40,APOBEC3G,SH3KBP1,HVCN1,GINS4,MX1,IFI44L,OAS2,OAS3,HLA-DRA,MYO1G
gene_set_query	274	MAX	0.08401	GTEx Coexpression,0.08401	GIMAP2,DAPP1,IKZF1,VAV1,HLA-E,TMEM71,PYCARD,INPP5D,CHST15,RAC2,JAK3,S100A9
gene_set_query	275	PLAGL1	0.08405	Enrichr Queries,0.08405	IFITM3,TINAGL1,FHL2,PLAT,PIK3R1,AHR,PTGS2,ETS1,LGALS3,CCND2,ENPP2,CCL2,IGFBP7,PHLDA1,CTSC,TGM2,DUSP5,ANXA1,ANXA2,ANXA3,GPX3,EMP1,CXCL10,SFRP1,KCTD12,BCAT1,CD44,MATN2,FBN1
gene_set_query	276	ZFP57	0.08415	ARCHS4 Coexpression,0.08415	DENND2D,SAMD9,ASCL2,PSMB8,BST2,PYCARD,INPP5D,ARHGDIB,RAC2,ELMO1,NLRP2,FXYD5
gene_set_query	277	JUN	0.08475	ENCODE ChIP-seq,0.08475	LY6K,LRRK2,LY96,IFIT3,PAPSS2,TMEM71,AGPAT4,SERTAD4,ARHGDIB,CCL2,SNX5,GBP3,SRGN,ANXA1,IL4R,ANXA2,ANXA3,ITGA2,EMP1,TM4SF1,TMEM154,CLEC2B,LPAR6,FAS,CNGB3,SP140L,TLR4
gene_set_query	278	FOXE1	0.08477	ARCHS4 Coexpression,0.08477	CD40,CSTA,TINAGL1,GPX3,SEMA3D,MYOF,WDR72,KRT15,LPCAT2,TP63,MATN2,MPZL2
gene_set_query	279	SOX9	0.08537	Literature ChIP-seq,0.08537	GALNT14,IFITM2,SEMA3E,IL1RAP,KRT20,CLDN1,NCALD,PYCARD,LGALS3,CDH3,GPNMB,INPP5D,SOSTDC1,IGFBP7,TNS4,KRT222,CHST9,PPP1R14C,ANXA2,PLEKHA2,ITGA2,MYOF,SPINK5,ITGA1,MITF,TMPRSS11E,DKK3,ANO3,PTPRE,SFRP1,VSNL1,LPCAT2,SLC9A9,ELMO1,CD44,MATN2
gene_set_query	280	ZBTB24	0.086	ARCHS4 Coexpression,0.086	DOCK11,HLA-H,SP100,PLEKHA2,INPP5D,ARHGDIB,IKZF1,JAK3,ETS1,DKK3,MYO1G
gene_set_query	281	HOXB4	0.08618	Enrichr Queries,0.08618	TINAGL1,FHL2,PLAT,PTGS2,ETS1,IFIT3,LGALS3,CCND2,CCL2,PITX2,PHLDA1,TGM2,GBP3,DUSP5,ANXA1,ANXA2,EMP1,BST2,BMP4,CXCL10,SFRP1,MMP14,CDK6,S100A6,PPARG,KCTD12,SKAP1,CD44,FBN1
gene_set_query	282	NFIL3	0.08689	Enrichr Queries,0.08689	IFITM3,IFITM2,TINAGL1,FHL2,AHR,PTGS2,ETS1,IFIT3,IFIT2,ICAM1,LGALS3,CCND2,GPNMB,RGS1,CCL2,PHLDA1,CTSC,TGM2,SRGN,DUSP5,ANXA1,ANXA2,ANXA3,EMP1,CXCL10,PLSCR1,S100A6,S100A9,CD44
gene_set_query	283	ZNF440	0.08712	GTEx Coexpression,0.08712	IL18,TACSTD2,KRT5,CLDN1,TMPRSS13,KLK11,TMEM154,FERMT1,SDR16C5,POF1B,TNS4,TP63
gene_set_query	284	TCF7L2	0.08722	ARCHS4 Coexpression,0.08722	GJC1,SFRP1,ARHGDIB,RAC2,IGF2BP1,MSN,IGF2BP3,IKZF1,HLA-A,BCAT1,HLA-E
gene_set_query	285	NR4A2	0.08761	Enrichr Queries,0.08761	IFITM3,IFITM1,TINAGL1,PIK3R1,AHR,PTGS2,NR3C1,ETS1,IFIT3,IFIT2,ICAM1,LGALS3,CCND2,GPNMB,RGS1,ENPP2,CCL2,PHLDA1,TGM2,SRGN,DUSP5,ANXA1,RSAD2,ANXA2,GPX3,EMP1,CXCL10,KCTD12,CD44
gene_set_query	286	ZNF296	0.08774	GTEx Coexpression,0.08774	DENND2D,HCP5,APOBEC3G,DAPP1,PSMB8,TMEM154,PYCARD,ARMCX1,OAS1,RAC2,SKAP1,MYO1G
gene_set_query	287	NR2F2	0.08784	ARCHS4 Coexpression,0.08784	TPM4,INPP5D,MYOF,ARHGDIB,RAC2,IGFBP7,IKZF1,BMP7,HLA-E,FBN1,MYO1G
gene_set_query	288	MEF2C	0.08832	Enrichr Queries,0.08832	IFITM3,TINAGL1,ITPR1,PIK3R1,PTGS2,NR3C1,ETS1,HDAC9,NCALD,CCND2,ARHGDIB,ENPP2,CCL2,IGFBP7,PHLDA1,CTSC,ANXA1,ANXA2,EMP1,MSN,SORL1,CXCL10,CDK6,ELMO1,KCTD12,CD200,CD44,FBN1
gene_set_query	289	NKX26	0.08845	ARCHS4 Coexpression,0.08845	GREM1,MMP14,COL2A1,FHL2,ATP10A,SMTNL2,SP140L,TBX5,FBLN2,DKK3,FBN1
gene_set_query	290	FOXS1	0.08907	ARCHS4 Coexpression,0.08907	IFITM3,GJC1,TPM4,DNAH8,ITGA1,FHL2,SPATS2L,IGFBP7,FZD10,FBLN2,FBN1
gene_set_query	291	ZNF350	0.08974	Enrichr Queries,0.08974	IFITM1,SP100,SAMD9,IFI6,PIK3R1,AHR,IFIT1,PTGS2,NR3C1,DDX60,IFIT3,IFI44L,IFIT2,LGALS3,GPNMB,IFI16,GBP3,SRGN,DUSP5,ANXA1,ANXA3,MX1,ISG15,SORL1,BST2,CXCL10,TRIM38,CD44
gene_set_query	292	PBX2	0.09023	GTEx Coexpression,0.09023	INPP5D,ARHGDIB,CHST15,RAC2,GIMAP2,IKZF1,HLA-A,JAK3,VAV1,HLA-E,TMEM71
gene_set_query	293	AIRE	0.09046	Enrichr Queries,0.09046	IFITM3,IFITM1,CD40,TINAGL1,DAPP1,SEMA3E,IKZF1,AHR,PTGS2,ICAM1,LGALS3,CCND2,INPP5D,ARHGDIB,CCL2,ANXA1,ANXA2,ERAP2,MX1,IL18,PSMB8,ASS1,CXCL10,COL2A1,S100A6,PPARG,S100A9,CD44
gene_set_query	294	IRX1	0.09085	GTEx Coexpression,0.09085	SFRP1,MMP14,ANXA2,GPNMB,KRT15,MYOF,PAX3,TNS4,TMPRSS13,CD44,XG
gene_set_query	295	ELK4	0.09091	ARCHS4 Coexpression,0.09091	DOCK11,SLFN5,APOL6,MDFIC,ERAP2,PLEKHA2,IKZF1,PIK3R1,AHR,PARP14,ETS1
gene_set_query	296	OTX2	0.09091	ReMap ChIP-seq,0.09091	AHR,PAPSS2,IFI44L,IFIT2,AGPAT4,EPSTI1,ENPP2,ST3GAL6,IGFBP7,PITX2,ANXA1,ANXA2,ANXA3,MYOF,IL18,EMP1,TM4SF1,BMP6,PTPRE,PLSCR1,S100A6,SPATS2L,CNGB3,BCAT1,TLR4,MATN2
gene_set_query	297	SMAD4	0.09146	Literature ChIP-seq,0.09146	TINAGL1,ANXA1,ANXA2,SAMD9,ITGA2,MYOF,FHL2,EMP1,MDFIC,KRT15,PLS3,SFN,BCAT1,PHLDA1,TGM2
gene_set_query	298	GSC2	0.09147	GTEx Coexpression,0.09147	CCNB3,MAGEA12,SAGE1,DNAH8,MAGEA1,DDX43,PRAME,MAGEA6,MAGEA3,MAGEA4,SSX1
gene_set_query	299	ZNF75D	0.09152	ARCHS4 Coexpression,0.09152	DOCK11,SLFN5,SAMD9L,APOL6,APOBEC3G,LRRK2,IKZF1,PARP14,TLR4,ETS1,SORL1
gene_set_query	300	HOXB9	0.09188	Enrichr Queries,0.09188	IFITM1,TINAGL1,PLAT,PTGS2,CLDN1,ETS1,IFIT3,IFIT2,ICAM1,LGALS3,CCND2,IGF2BP1,CCL2,PITX2,PHLDA1,TGM2,DUSP5,ANXA1,ANXA3,EMP1,BMP7,ASS1,BMP4,CXCL10,CDK6,PPARG,BCAT1,CD44
gene_set_query	301	NKX24	0.0921	GTEx Coexpression,0.0921	CCNB3,FAM133A,SAGE1,MAGEA1,PNMA5,PRAME,MAGEA6,MAGEA3,DSCR8,MAGEA4,SSX1
gene_set_query	302	HMGA2	0.09214	ARCHS4 Coexpression,0.09214	GJC1,SFRP1,ARMCX2,TPM4,ITGA2,IGF2BP1,IGF2BP3,HLA-A,BCAT1,PHLDA1,HLA-E
gene_set_query	303	ZNF300	0.09259	Enrichr Queries,0.09259	SP100,SAMD9,IFIT1,PTGS2,IFIT3,IFI44L,IFIT2,CCND2,GPNMB,IFI16,OLFML3,EPB41L3,CHST15,ENPP2,NLRP2,CCL2,PHLDA1,ANXA1,ERAP2,GPX3,ITGA2,IFI44,EMP1,BST2,CXCL10,SFRP1,CDK6,CD44
gene_set_query	304	TSHZ3	0.09275	ARCHS4 Coexpression,0.09275	GREM1,MMP14,TPM4,CHST15,ZNF469,IGFBP7,KCTD12,TLR4,FBLN2,DKK3,FBN1
gene_set_query	305	ZNF711	0.09334	GTEx Coexpression,0.09334	CCNB3,FAM133A,MAGEA12,SAGE1,DNAH8,MAGEA1,PRAME,MAGEA6,MAGEA3,MAGEA4,SSX1
gene_set_query	306	DZIP1	0.09337	ARCHS4 Coexpression,0.09337	GJC1,INPP5D,ARHGDIB,RAC2,IGF2BP1,IKZF1,HLA-A,FXYD5,PSMB8,HLA-E,MYO1G
gene_set_query	307	TBX22	0.09396	GTEx Coexpression,0.09396	CCNB3,SAGE1,DNAH8,MAGEA1,DDX43,PRAME,MAGEA6,MAGEA3,DSCR8,MAGEA4,SSX1
gene_set_query	308	FOSL2	0.09398	ARCHS4 Coexpression,0.09398	SRGN,MMP14,IL4R,MYOF,CHST15,EMP1,MSN,AHR,PTGS2,TLR4,ICAM1
gene_set_query	309	MSX1	0.09402	Enrichr Queries,0.09402	IFITM3,IFITM1,TINAGL1,FHL2,FBLN1,PTGS2,CLDN1,ETS1,FBLN2,LGALS3,CCND2,GPNMB,ENPP2,CCL2,IGFBP7,PITX2,PHLDA1,TGM2,DUSP5,ANXA1,ANXA2,EMP1,BMP7,BMP4,CXCL10,SFRP1,CD44,FBN1
gene_set_query	310	ALX1	0.09459	GTEx Coexpression,0.09459	MMP14,ANXA2,GPNMB,TPM4,OLFML3,ARSJ,MYOF,SLC12A1,PAX3,XG,FBN1
gene_set_query	311	ESX1	0.09521	GTEx Coexpression,0.09521	CCNB3,SAGE1,DNAH8,MAGEA1,DDX43,PRAME,MAGEA6,MAGEA3,DSCR8,MAGEA4,SSX1
gene_set_query	312	ZHX1	0.09583	GTEx Coexpression,0.09583	CSTA,ANXA1,FABP5,TTC22,SPINK5,EMP1,MKRN3,TMPRSS11E,SPRR1A,BMP7,MPZL2
gene_set_query	313	TBX2	0.09645	GTEx Coexpression,0.09645	TINAGL1,SLFN11,ITGA1,PLS3,MSN,IGFBP7,PARP14,NKD1,APOL3,GBP4,TGM2
gene_set_query	314	AR	0.09756	Literature ChIP-seq,0.09756	RTP4,HCP5,GALNT14,MCTP1,CPNE5,TTC22,HEXA,PLAT,FZD10,IFIT1,ETS1,HS6ST3,SULT1C2,CCND2,EPSTI1,UGT2A3,TP63,CTSC,SLC16A5,TGM2,DUSP5,CHST9,TCF15,ANXA3,ITGA2,SPINK5,MITF,DKK3,ANO3,CLDN10,SFRP1,MDFIC,OAF,MPPED2,CLIP4,RGN,ELMO1,AMTN,PPARG,KCTD12,SMTNL2,TLR4,SKAP1,MATN2,SP100,CD163L1,RGS13,DNAH8,ATP10A,PIK3R1,PAPSS2,THSD4,NCALD,TMEM71,GJC1,GPNMB,OLFML3,PRDM16,NLRP2,IGF2BP3,CSMD3,PLTP,SNX5,APOL3,PPP1R14C,CC…
gene_set_query	315	ETV4	0.09758	Enrichr Queries,0.09758	IFITM1,TINAGL1,FHL2,PLAT,PTGS2,CLDN1,ETS1,LGALS3,CCND2,CCL2,PHLDA1,TGM2,DUSP5,NQO1,ANXA1,ITGA2,EMP1,TM4SF1,ASS1,BMP4,CXCL10,SFRP1,MMP14,CDK6,S100A6,FXYD5,BCAT1,CD44
gene_set_query	316	MEF2A	0.09764	ReMap ChIP-seq,0.09764	SH3KBP1,RGS13,GSTP1,HFE,IFI6,PLAT,NR3C1,RGS1,CTSC,DENND2D,DUSP5,ANXA1,ANXA2,TPM4,MACC1,ISG15,BMP7,SORL1,PSMB8,CDK6,MDFIC,FAS,BCAT1,CD44,MYO1G
gene_set_query	317	ZHX2	0.09828	ARCHS4 Coexpression,0.09828	CD40,IL4R,PLEKHA2,OAS2,MX2,CHST15,IKZF1,HLA-A,ETS1,APOL3,ICAM1
gene_set_query	318	ZNF175	0.09829	Enrichr Queries,0.09829	SLFN5,SAMD9L,ITPR1,PIK3R1,AHR,PTGS2,HDAC9,IFIT3,IFI44L,IFIT2,ICAM1,CCND2,CCL2,PHLDA1,GBP4,TGM2,DUSP5,ANXA1,ITGA2,EMP1,SORL1,CXCL10,CDK6,OAS2,KCTD12,XAF1,CD44,FBN1
gene_set_query	319	ZNF407	0.09889	ARCHS4 Coexpression,0.09889	DOCK11,SLFN5,APOL6,LRRK2,KYNU,IKZF1,AHR,PARP14,TLR4,SORL1
gene_set_query	320	IRX2	0.09894	GTEx Coexpression,0.09894	SDR16C5,POF1B,GPNMB,SOSTDC1,TNS4,CLDN1,TMPRSS13,TP63,CD44,KLK11,XG
gene_set_query	321	HOXC6	0.099	Enrichr Queries,0.099	IFITM1,TINAGL1,FHL2,PLAT,PTGS2,FBLN2,CCND2,GPNMB,OLFML3,CCL2,IGFBP7,PITX2,PHLDA1,ANXA1,ANXA2,ANXA3,GPX3,EMP1,TM4SF1,BMP4,GREM1,CXCL10,SFRP1,COL2A1,S100A6,PPARG,MATN2,FBN1
gene_set_query	322	ZBTB14	0.09951	ARCHS4 Coexpression,0.09951	DOCK11,CPNE5,PLEKHA2,DAPP1,MSN,IKZF1,JAK3,ETS1,BMP6,HLA-E
gene_set_query	323	ASCL3	0.09956	GTEx Coexpression,0.09956	CHST9,CLDN10,SLFN13,SFRP1,SERTAD4,LPAR6,B3GNT3,TACSTD2,AMTN,PAX3,PHLDA1
gene_set_query	324	ANKZF1	0.1001	ARCHS4 Coexpression,0.1001	IL4R,SAMD9,INPP5D,RAC2,IKZF1,HLA-A,JAK3,ETS1,HLA-E,MYO1G
gene_set_query	325	TBX5	0.1007	ARCHS4 Coexpression,0.1007	GREM1,CKMT2,ARSJ,FHL2,ZNF469,FBLN1,FBLN2,OOEP,DKK3,FBN1
gene_set_query	326	CDX2	0.101	ReMap ChIP-seq,0.101	TINAGL1,GSTP1,TMPRSS4,FHL2,LGALS3,SULT1C2,TNS4,PHLDA1,MPZL2,ANXA2,ANXA3,CCL20,MACC1,MYOF,TM4SF1,BMP4,FERMT1,CXCL10,FABP5,UBXN10,KRT15,RAB34,B3GNT3,S100A6,PPARG
gene_set_query	327	ZUP1	0.1011	Enrichr Queries,0.1011	IFITM3,RTP4,SLFN5,SP100,SAMD9L,UBE2L6,IFI35,IFIT1,PTGS2,DDX60,IFIT3,IFIT2,OASL,CCND2,EPSTI1,CTSC,GBP4,GBP3,DUSP5,RSAD2,IFI44,PLA2G4A,ISG15,PARP14,CXCL10,OAS2,OAS3,XAF1
gene_set_query	328	MYBL1	0.1014	GTEx Coexpression,0.1014	APOBEC3G,CD8B,INPP5D,RAC2,MSN,ATP10A,IKZF1,FXYD5,TRIM38,SKAP1,MYO1G
gene_set_query	329	ZNF311	0.1019	Enrichr Queries,0.1019	TINAGL1,IFI6,FHL2,IFIT1,ETS1,IFIT3,IFI44L,ICAM1,IFI16,PRDM16,EPSTI1,CCL2,DUSP5,MX2,MX1,IFI44,ISG15,PARP14,BST2,BMP4,CXCL10,SFRP1,CDK6,OAS1,CD44,MATN2,FBN1
gene_set_query	330	TBX18	0.102	ARCHS4 Coexpression,0.102	GREM1,MMP14,TPM4,MYOF,EMP1,PLS3,FBLN1,IGFBP7,FBLN2,FBN1
gene_set_query	331	ZNF462	0.1021	GTEx Coexpression,0.1021	SH3KBP1,KYNU,CLIP4,RAC2,GIMAP2,IKZF1,SORL1,VAV1,PSMB8,IL27RA,MYO1G
gene_set_query	332	ZNF331	0.1026	Enrichr Queries,0.1026	IFITM1,IFITM2,IFI6,PIK3R1,PTGS2,NR3C1,ETS1,IFI44L,ICAM1,LGALS3,CCND2,GPNMB,RGS1,CCL2,PHLDA1,GBP1,SRGN,DUSP5,ANXA1,CCL20,GPX3,EMP1,ISG15,SORL1,CXCL10,KCTD12,CD44
gene_set_query	333	ZNF322	0.1026	ARCHS4 Coexpression,0.1026	SH3KBP1,INPP5D,ARHGDIB,RAC2,IGF2BP1,PLS3,IGF2BP3,FXYD5,BCAT1,HLA-E
gene_set_query	334	ZBTB34	0.1027	GTEx Coexpression,0.1027	SRGN,IFITM2,CLEC7A,ARHGDIB,GIMAP2,LY96,JAK3,TLR4,SORL1,VAV1,TMEM71
gene_set_query	335	SMAD5	0.1032	ARCHS4 Coexpression,0.1032	INPP5D,ARHGDIB,RAC2,PLS3,IKZF1,HLA-A,VAV1,PSMB8,HLA-E,MYO1G
gene_set_query	336	NOBOX	0.1033	GTEx Coexpression,0.1033	CCNB3,MAGEA12,SAGE1,MAGEA1,DDX43,PRAME,MAGEA6,MAGEA3,OOEP,MAGEA4,SSX1
gene_set_query	337	ZNF469	0.1038	ARCHS4 Coexpression,0.1038	GREM1,MMP14,TPM4,ARSJ,MYOF,IGFBP7,ATP10A,FBLN2,DKK3,FBN1
gene_set_query	338	BHLHE23	0.1039	GTEx Coexpression,0.1039	CD40,APOBEC3G,SH3KBP1,OAS2,HVCN1,OAS3,GINS4,HLA-DRA,ZNF257,SKAP1,IFI44L
gene_set_query	339	MEOX1	0.104	Enrichr Queries,0.104	TINAGL1,PLAT,FBLN1,PTGS2,ETS1,FBLN2,IFIT3,ICAM1,CCND2,GPNMB,OLFML3,ENPP2,CCL2,IGFBP7,PHLDA1,TGM2,ANXA1,ANXA3,GPX3,EMP1,TM4SF1,BMP4,CXCL10,SFRP1,PPARG,MATN2,FBN1
gene_set_query	340	ONECUT1	0.1044	ReMap ChIP-seq,0.1044	SEMA3D,PIK3R1,AHR,NR3C1,CLDN1,PAPSS2,SLCO1B3,IGF2BP1,IGF2BP3,TGM2,KRT222,CHST9,BCHE,BHMT2,MYOF,ITGA1,SORL1,TM4SF1,MMP14,CDK6,VSNL1,SPATS2L,TACC1,CPVL
gene_set_query	341	MKX	0.1044	ARCHS4 Coexpression,0.1044	GREM1,TPM4,MYOF,ZNF469,FBLN1,ATP10A,TBX5,FBLN2,DKK3,FBN1
gene_set_query	342	ZBTB7B	0.1045	GTEx Coexpression,0.1045	SDR16C5,POF1B,IL18,SFN,TNS4,CLDN1,ASCL2,TMPRSS13,TP63,KLK11,TMEM154
gene_set_query	343	LMX1B	0.1052	GTEx Coexpression,0.1052	SFRP1,SERTAD4,PPP1R14C,POF1B,GPNMB,KRT15,SOSTDC1,TNS4,CLDN1,TMPRSS13,TP63
gene_set_query	344	RBCK1	0.1057	ARCHS4 Coexpression,0.1057	IFITM3,IFITM2,IL4R,OAS1,OAS2,OAS3,RAC2,IFI35,HLA-A,HLA-E
gene_set_query	345	ZNF25	0.1061	Enrichr Queries,0.1061	SAMD9L,TINAGL1,ITPR1,FHL2,PLAT,PIK3R1,AHR,PTGS2,ETS1,IFIT3,NCALD,IFIT2,LGALS3,SERTAD4,IGFBP7,TGM2,ANXA1,ANXA2,GPX3,MYOF,IFI44,EMP1,CXCL10,KCTD12,CD44,MATN2,FBN1
gene_set_query	346	KLF10	0.1063	ARCHS4 Coexpression,0.1063	DUSP5,PTPRE,PLSCR1,GPX3,TACSTD2,IGF2BP1,AHR,CLDN1,TM4SF1,CD44
gene_set_query	347	VENTX	0.1064	GTEx Coexpression,0.1064	PYCARD,PTPRE,IFITM2,CLEC7A,ARHGDIB,GIMAP2,LY96,JAK3,TLR4,VAV1,TMEM71
gene_set_query	348	CREM	0.1068	Enrichr Queries,0.1068	IFITM1,TINAGL1,PIK3R1,AHR,PTGS2,NR3C1,ETS1,IFIT3,IFIT2,ICAM1,LGALS3,CCND2,RGS1,CCL2,PHLDA1,CTSC,TGM2,SRGN,DUSP5,ANXA1,ANXA2,EMP1,ISG15,CXCL10,PLSCR1,S100A6,CD44
gene_set_query	349	ZNF280A	0.1069	ARCHS4 Coexpression,0.1069	MAGEA12,SAGE1,DNAH8,PRAME,MAGEA6,CSAG1,MAGEA3,GTSF1,OOEP,SSX1
gene_set_query	350	CDX4	0.107	GTEx Coexpression,0.107	SDR16C5,PPP1R14C,POF1B,IL18,TNS4,CLDN1,ASCL2,TMPRSS13,TP63,XG,TMEM154
gene_set_query	351	GLI1	0.1075	Enrichr Queries,0.1075	TINAGL1,PLAT,FBLN1,PTGS2,CLDN1,ETS1,FBLN2,ICAM1,CCND2,OLFML3,ENPP2,CCL2,IGFBP7,PLTP,TGM2,DUSP5,GPX3,EMP1,BMP4,CXCL10,SFRP1,MMP14,COL2A1,CDK6,PPARG,CD44,FBN1
gene_set_query	352	SALL3	0.1081	ARCHS4 Coexpression,0.1081	GJC1,BCHE,SFRP1,CCND2,FABP5,MPPED2,IGF2BP1,IGF2BP3,BCAT1,NCALD
gene_set_query	353	HEY1	0.1083	Enrichr Queries,0.1083	TINAGL1,PLAT,PTGS2,ETS1,ICAM1,CCND2,GPNMB,OLFML3,ARHGDIB,CHST15,ENPP2,CCL2,IGFBP7,PHLDA1,TGM2,DUSP5,ANXA1,GPX3,EMP1,TM4SF1,BMP4,CXCL10,SFRP1,S100A6,KCTD12,CD44,FBN1
gene_set_query	354	PAX8	0.1087	ARCHS4 Coexpression,0.1087	TINAGL1,GPX3,SEMA3D,MYOF,LPCAT2,SLC12A1,WDR72,IGFBP7,APOL1,MATN2
gene_set_query	355	ZNF467	0.109	Enrichr Queries,0.109	IFITM3,IFITM1,TINAGL1,HFE,IFIT1,ETS1,IFIT3,IFIT2,ICAM1,LGALS3,CCND2,CHST15,CCL2,PHLDA1,TGM2,DUSP5,RSAD2,EMP1,ISG15,SORL1,BST2,CXCL10,IFI27,S100A6,KCTD12,S100A9,CD44
gene_set_query	356	BNC2	0.1093	ARCHS4 Coexpression,0.1093	GJC1,ANXA2,TPM4,ARSJ,GABRA3,FHL2,SPATS2L,MITF,BCAT1,FBN1
gene_set_query	357	GATA5	0.1095	GTEx Coexpression,0.1095	CCNB3,SULT1C2,COL2A1,SAGE1,MAGEA1,DDX43,PRAME,MAGEA6,MAGEA3,MAGEA4
gene_set_query	358	FOXF2	0.1097	Enrichr Queries,0.1097	TINAGL1,FHL2,PLAT,FBLN1,PTGS2,ETS1,FBLN2,CCND2,GPNMB,ENPP2,CCL2,IGFBP7,PITX2,PHLDA1,TGM2,ANXA1,ANXA3,EMP1,TM4SF1,BMP6,BMP4,GREM1,CXCL10,SFRP1,PPARG,CD44,FBN1
gene_set_query	359	JUNB	0.11	ARCHS4 Coexpression,0.11	HLA-H,IL4R,INPP5D,ARHGDIB,RAC2,IKZF1,HLA-A,FXYD5,HLA-E,MYO1G
gene_set_query	360	SIM1	0.1101	GTEx Coexpression,0.1101	GREM1,SLFN5,MMP14,ANXA2,OLFML3,MYOF,IGF2BP1,IGF2BP3,XG,FBN1
gene_set_query	361	ELF5	0.1104	Enrichr Queries,0.1104	TINAGL1,TMPRSS4,TACSTD2,FHL2,PTGS2,CLDN1,ETS1,NCALD,GPNMB,SOSTDC1,PHLDA1,MPZL2,TGM2,ANXA1,ANXA3,EMP1,KRT5,TM4SF1,CXCL10,SFRP1,KRT15,MPPED2,PPARG,S100P,S100A9,CD44,MATN2
gene_set_query	362	GTF3A	0.1118	ARCHS4 Coexpression,0.1118	PYCARD,CD8B,SH3KBP1,ARHGDIB,RAC2,UBE2L6,IKZF1,FXYD5,PSMB8,IL27RA
gene_set_query	363	ZNF746	0.1124	ARCHS4 Coexpression,0.1124	IFITM2,CLEC7A,MX2,CHST15,HLA-A,TLR4,S100A9,SORL1,HLA-E,TMEM154
gene_set_query	364	POU2F3	0.1125	Enrichr Queries,0.1125	TINAGL1,TMPRSS4,TACSTD2,PTGS2,NR3C1,CLDN1,ASCL2,ETS1,CCND2,PRDM16,TNS4,PHLDA1,MPZL2,TGM2,DUSP5,ANXA1,GPX3,KLK10,BMP7,TMPRSS13,SORL1,ASS1,CXCL10,KRT15,PPARG,XAF1,BCAT1
gene_set_query	365	ZNF561	0.1133	GTEx Coexpression,0.1133	TTC22,GSTP1,MYOF,ELMO1,TACSTD2,KRT5,TP63,CD44,KLK11,TMEM154
gene_set_query	366	MYB	0.1136	ARCHS4 Coexpression,0.1136	SRGN,SLFN11,CDK6,INPP5D,ARHGDIB,MSN,PRAME,IKZF1,GTSF1,MYO1G
gene_set_query	367	TP73	0.1139	GTEx Coexpression,0.1139	SDR16C5,POF1B,MACC1,IL18,TACSTD2,KRT5,TMPRSS13,TP63,KLK11,TMEM154
gene_set_query	368	FOXL2	0.1143	ARCHS4 Coexpression,0.1143	CD40,MAGEA12,SAGE1,MAGEA1,PRAME,MAGEA2B,MAGEA6,CSAG1,MAGEA3,SSX1
gene_set_query	369	SIX2	0.1145	ReMap ChIP-seq,0.1145	RTP4,IFITM1,CPNE5,ANXA3,PLEKHA2,ITPR1,EMP1,DAPP1,FBLN1,FZD10,ETS1,BMP7,SORL1,BMP6,BST2,SULT1C2,SFRP1,COL2A1,IFI16,FAS,SMTNL2,PHLDA1,GBP1
gene_set_query	370	ZNF729	0.1145	GTEx Coexpression,0.1145	CCNB3,DNAH8,SPESP1,MAGEA1,DDX43,PRAME,MAGEA3,GTSF1,DSCR8,MAGEA4
gene_set_query	371	TGIF1	0.1147	Enrichr Queries,0.1147	IFITM3,TINAGL1,FHL2,PIK3R1,PTGS2,ETS1,ICAM1,LGALS3,CCL2,PHLDA1,CTSC,TGM2,DUSP5,ANXA1,ANXA2,TPM4,ANXA3,MYOF,EMP1,MSN,TM4SF1,CXCL10,PLSCR1,CDK6,S100A6,FXYD5,CD44
gene_set_query	372	SP3	0.1151	GTEx Coexpression,0.1151	DOCK11,MMP14,SP100,CLEC2B,MDFIC,IFI16,MYOF,TRIM38,NR3C1,ETS1
gene_set_query	373	SOX18	0.1157	GTEx Coexpression,0.1157	TINAGL1,SLFN11,IFI27,TCF15,PPARG,KCTD12,ETS1,TM4SF1,APOL3,BMP6
gene_set_query	374	ALX4	0.1164	GTEx Coexpression,0.1164	SFRP1,MMP14,ANXA2,GPNMB,OLFML3,MYOF,PAX3,TP63,CD44,XG
gene_set_query	375	NFYC	0.1167	ARCHS4 Coexpression,0.1167	IFITM2,INPP5D,HVCN1,MX2,MYOF,RAC2,CHI3L1,IFI35,VAV1,HLA-E
gene_set_query	376	SOX17	0.117	GTEx Coexpression,0.117	TINAGL1,SLFN11,MDFIC,PPARG,TACC1,KCTD12,ETS1,TM4SF1,APOL3,BMP6
gene_set_query	377	SIX4	0.1173	ARCHS4 Coexpression,0.1173	GJC1,UBXN10,MYOF,RAC2,IGF2BP3,IKZF1,HLA-A,SMTNL2,HLA-E,MYO1G
gene_set_query	378	ZNF266	0.1175	Enrichr Queries,0.1175	IFITM3,IFITM1,IFITM2,IFI6,ITPR1,PIK3R1,NR3C1,ETS1,IFIT3,IFI44L,LGALS3,GPNMB,IFI16,IGF2BP3,GBP1,CTSC,GBP3,DUSP5,ANXA1,ANXA2,ANXA3,MX1,IFI44,CXCL10,XAF1,CD44
gene_set_query	379	NANOGNB	0.1182	GTEx Coexpression,0.1182	CCNB3,MAGEA12,SAGE1,MAGEA1,DDX43,PRAME,MAGEA6,MAGEA3,MAGEA4,SSX1
gene_set_query	380	ZNF597	0.1182	Enrichr Queries,0.1182	SAMD9L,TINAGL1,FHL2,AHR,IFIT1,PTGS2,CLDN1,ETS1,IFIT3,IFIT2,ICAM1,OASL,CCND2,CCL2,PHLDA1,GBP3,DUSP5,ANXA1,RSAD2,EMP1,MITF,ISG15,SORL1,CXCL10,PPARG,FBN1
gene_set_query	381	ESR1	0.1186	ENCODE ChIP-seq,0.1186	TINAGL1,ANXA1,ANXA2,ANXA3,PLEKHA2,GDA,PTPRO,TMPRSS4,EMP1,PLAT,KRT5,PAPSS2,ASS1,SULT1C2,CHST15,B3GNT3
gene_set_query	382	ZHX3	0.1189	GTEx Coexpression,0.1189	DENND2D,HCP5,ITGA1,SLITRK3,ITPR1,SEMA3E,ATP10A,HDAC9,NKD1,PSMB8
gene_set_query	383	ZBTB48	0.1192	ARCHS4 Coexpression,0.1192	PYCARD,IFITM2,IL4R,OAS1,INPP5D,ARHGDIB,RAC2,HLA-A,HLA-E,MYO1G
gene_set_query	384	EBF3	0.1201	GTEx Coexpression,0.1201	DOCK11,TINAGL1,SLFN11,MDFIC,PPARG,KCTD12,NR3C1,FBLN2,APOL3,BMP6
gene_set_query	385	ZNF275	0.1204	Enrichr Queries,0.1204	IFITM3,TINAGL1,ITPR1,PIK3R1,ETS1,IFIT3,IFIT2,ICAM1,CCND2,PLS3,PHLDA1,GBP4,TGM2,DUSP5,ANXA1,ANXA3,GPX3,EMP1,MSN,SORL1,CXCL10,CDK6,MDFIC,KCTD12,BCAT1,CD44
gene_set_query	386	TCF7L1	0.1204	ARCHS4 Coexpression,0.1204	GJC1,SFRP1,ARMCX2,GINS4,RAC2,IGF2BP1,MSN,IGF2BP3,HLA-A,NCALD
gene_set_query	387	EBF2	0.1207	GTEx Coexpression,0.1207	SLFN11,MDFIC,PPARG,TACC1,KCTD12,AHR,NR3C1,FBLN2,APOL3,MATN2
gene_set_query	388	CEBPD	0.121	ARCHS4 Coexpression,0.121	IFITM3,PYCARD,IFITM2,IL4R,CLEC7A,CHST15,HLA-A,TLR4,S100A9,HLA-E
gene_set_query	389	LEUTX	0.1213	GTEx Coexpression,0.1213	APOBEC3C,CD40,APOBEC3G,OAS2,HVCN1,OAS3,GINS4,MX1,IFI44L,MYO1G
gene_set_query	390	GATA4	0.1216	ARCHS4 Coexpression,0.1216	CKMT2,LAMA1,NRK,RGN,FHL2,WDR72,PITX2,TBX5,DNASE1L3
gene_set_query	391	GATA2	0.122	Literature ChIP-seq,0.122	DUSP5,SLFN5,IFITM2,ANXA3,ITGA2,PLAT,PIK3R1,NR3C1,TM4SF1,THSD4,CCND2,MDFIC,UBXN10,ARHGDIB,RAC2,ELMO1,ST3GAL6,TRPM6,TLR4,MAGEA4,TGM2
gene_set_query	392	HSFY1	0.122	GTEx Coexpression,0.122	CLDN10,CSTA,SP100,ANXA1,TTC22,MSN,TMPRSS11E,SPRR1A,PHLDA1,APOL3
gene_set_query	393	DLX3	0.1226	GTEx Coexpression,0.1226	SDR16C5,PPP1R14C,POF1B,TYRP1,TNS4,CLDN1,TMPRSS13,TP63,KLK11,XG
gene_set_query	394	KLF9	0.1229	ARCHS4 Coexpression,0.1229	CKMT2,MDFIC,FHL1,ITGA1,EMP1,TACC1,KCTD12,PIK3R1,AHR
gene_set_query	395	CREBL2	0.1235	ARCHS4 Coexpression,0.1235	DOCK11,APOL6,MDFIC,GPNMB,EPB41L3,HLA-A,KCTD12,TLR4,APOL3
gene_set_query	396	CREB3L2	0.1241	ARCHS4 Coexpression,0.1241	GREM1,MMP14,TPM4,GPX3,MYOF,ENPP2,ZNF469,PAPSS2,FBN1
gene_set_query	397	ZNF665	0.1246	Enrichr Queries,0.1246	IFITM3,SAMD9L,TINAGL1,HFE,PIK3R1,AHR,IFIT1,IFIT3,IFIT2,ICAM1,LGALS3,CCND2,ENPP2,CCL2,PHLDA1,CTSC,GBP4,GBP3,ANXA1,RSAD2,ANXA3,GPX3,EMP1,SORL1,BMP4,CXCL10
gene_set_query	398	ZBTB49	0.1247	ARCHS4 Coexpression,0.1247	CCNB3,CLEC2B,EPSTI1,RAC2,UBE2L6,IKZF1,OOEP,BMP6,HLA-E
gene_set_query	399	TCF20	0.1251	GTEx Coexpression,0.1251	ARMCX1,TTC22,TACSTD2,NLRP2,DAPP1,SFN,KRT5,TP63,KLK11,TMEM154
gene_set_query	400	KLF13	0.1253	ARCHS4 Coexpression,0.1253	IL4R,INPP5D,RAC2,MSN,IKZF1,HLA-A,ETS1,HLA-E,MYO1G
gene_set_query	401	WT1	0.1254	Enrichr Queries,0.1254	TINAGL1,FHL2,PLAT,PIK3R1,PTGS2,NR3C1,ETS1,ICAM1,LGALS3,CCND2,CCL2,PITX2,TGM2,DUSP5,ANXA1,ANXA3,PLA2G4A,MITF,BMP7,BMP4,CXCL10,SFRP1,CDK6,PPARG,CD44,FBN1
gene_set_query	402	ZNF354A	0.1257	GTEx Coexpression,0.1257	SRGN,IFITM2,ANXA3,ARHGDIB,CHST15,GIMAP2,LY96,JAK3,TLR4,TMEM71
gene_set_query	403	NCOA2	0.1259	ARCHS4 Coexpression,0.1259	DOCK11,APOL6,LRRK2,CHST15,IKZF1,PIK3R1,TLR4,SORL1,TMEM154
gene_set_query	404	EGR1	0.1261	Enrichr Queries,0.1261	IFITM3,IFITM1,IFITM2,TINAGL1,FHL2,PTGS2,ETS1,IFIT3,IFIT2,ICAM1,LGALS3,CCND2,GPNMB,ENPP2,CCL2,PHLDA1,TGM2,DUSP5,ANXA1,ANXA2,ANXA3,GPX3,EMP1,CXCL10,S100A6,CD44
gene_set_query	405	AHDC1	0.1263	GTEx Coexpression,0.1263	PPP1R14C,GSTP1,KRT15,TACSTD2,SFN,FZD10,KRT5,TMPRSS13,TP63,KLK11
gene_set_query	406	FOXD1	0.1265	ARCHS4 Coexpression,0.1265	GREM1,MMP14,TPM4,ARSJ,MYOF,FHL2,ZNF469,DKK3,FBN1
gene_set_query	407	GATA6	0.1268	Enrichr Queries,0.1268	TINAGL1,FHL2,PLAT,AHR,PTGS2,CLDN1,ETS1,ICAM1,LGALS3,CCND2,CCL2,IGFBP7,PITX2,PHLDA1,TGM2,DUSP5,ANXA1,ANXA3,GPX3,EMP1,BMP4,CXCL10,SFRP1,PPARG,CD44,FBN1
gene_set_query	408	NANOGP8	0.1269	GTEx Coexpression,0.1269	PTPRE,CLEC7A,INPP5D,RAC2,IKZF1,JAK3,SORL1,VAV1,IL27RA,MYO1G
gene_set_query	409	DMRTA1	0.1271	ARCHS4 Coexpression,0.1271	PRDM16,ARHGDIB,ITGA1,RAC2,MSN,IKZF1,HLA-A,FXYD5,HLA-E
gene_set_query	410	NKX28	0.1276	GTEx Coexpression,0.1276	CCNB3,FAM133A,SAGE1,MAGEA1,DDX43,PRAME,MAGEA6,MAGEA3,MAGEA4,SSX1
gene_set_query	411	HIVEP1	0.1278	ARCHS4 Coexpression,0.1278	DUSP5,SLFN5,APOL6,KYNU,AHR,PARP14,NR3C1,XAF1,CD200
gene_set_query	412	MIXL1	0.1282	GTEx Coexpression,0.1282	CD40,APOBEC3G,OAS2,HVCN1,OAS3,GINS4,MX1,HLA-DRA,IFI44L,MYO1G
gene_set_query	413	ZNF430	0.1288	GTEx Coexpression,0.1288	SAMD9,MACC1,SPINK5,IL18,TACSTD2,DAPP1,TP63,CD44,KLK11,TMEM154
gene_set_query	414	ZNF658	0.1289	Enrichr Queries,0.1289	SAMD9L,SAMD9,IFI6,AHR,IFIT1,PTGS2,DDX60,CLDN1,IFIT3,IFI44L,SERTAD4,CHST15,CCL2,GBP3,DUSP5,BCHE,ANXA1,ITGA2,IFI44,BMP4,CXCL10,OAS1,XAF1,S100A9,CES1,MATN2
gene_set_query	415	SNAI3	0.129	ARCHS4 Coexpression,0.129	PYCARD,IFITM2,INPP5D,CHST15,RAC2,HLA-A,VAV1,HLA-E,MYO1G
gene_set_query	416	ZNF230	0.1294	GTEx Coexpression,0.1294	SRGN,IFITM2,ARHGDIB,RAC2,GIMAP2,LY96,JAK3,TLR4,VAV1,TMEM71
gene_set_query	417	ZXDA	0.1296	ARCHS4 Coexpression,0.1296	DOCK11,SLFN5,MDFIC,MSN,IKZF1,PIK3R1,NR3C1,ETS1,MYO1G
gene_set_query	418	DLX5	0.1301	GTEx Coexpression,0.1301	SDR16C5,PPP1R14C,POF1B,IL18,TNS4,CLDN1,TMPRSS13,TP63,KLK11,XG
gene_set_query	419	IRX3	0.1307	GTEx Coexpression,0.1307	SDR16C5,PPP1R14C,POF1B,IL18,TACSTD2,TNS4,CLDN1,TMPRSS13,TP63,KLK11
gene_set_query	420	TEAD4	0.1313	ReMap ChIP-seq,0.1313	TINAGL1,ANXA1,ANXA2,TPM4,ANXA3,HFE,MYOF,ISG15,BMP7,TM4SF1,VAV1,ICAM1,DKK3,CDK6,KRT15,RAB34,SFN,IGF2BP3,TNS4,SNX5,SLC16A5,TGM2
gene_set_query	421	NCOA1	0.1314	ARCHS4 Coexpression,0.1314	DOCK11,CPNE5,CLEC7A,RAB34,LRRK2,PIK3R1,TLR4,SORL1,TMEM154
gene_set_query	422	SIX1	0.1318	Enrichr Queries,0.1318	IFITM3,IFITM1,TINAGL1,FHL2,IFIT1,PTGS2,IFIT3,IFIT2,LGALS3,CCND2,OLFML3,ENPP2,CCL2,IGFBP7,PITX2,PHLDA1,ANXA1,EMP1,BMP4,GREM1,CXCL10,SFRP1,PPARG,KCTD12,CD44,FBN1
gene_set_query	423	PRDM13	0.1319	GTEx Coexpression,0.1319	CD40,APOBEC3G,SH3KBP1,OAS2,HVCN1,OAS3,GINS4,MX1,HLA-DRA,IFI44L
gene_set_query	424	TET3	0.1325	GTEx Coexpression,0.1325	SDR16C5,POF1B,IL18,TNS4,CLDN1,TMPRSS13,TP63,CD44,KLK11,TMEM154
gene_set_query	425	GLI2	0.1327	ARCHS4 Coexpression,0.1327	GJC1,SFRP1,ARMCX2,RAB34,ARHGDIB,RAC2,IGF2BP1,IGF2BP3,HLA-E
gene_set_query	426	HELT	0.1332	GTEx Coexpression,0.1332	SDR16C5,PPP1R14C,POF1B,IL18,TNS4,CLDN1,TMPRSS13,TP63,KLK11,XG
gene_set_query	427	TCF15	0.1332	Enrichr Queries,0.1332	IFITM3,IFITM1,TINAGL1,LAMA1,FHL2,ETS1,FBLN2,CCND2,ENPP2,CCL2,PITX2,PLTP,TGM2,RSAD2,GPX3,EMP1,ISG15,BMP7,SORL1,BST2,BMP4,CXCL10,SFRP1,MPPED2,S100A6,PPARG
gene_set_query	428	PRDM2	0.1333	ARCHS4 Coexpression,0.1333	DOCK11,IL4R,PLEKHA2,INPP5D,TACC1,IKZF1,PIK3R1,TRIM38,ETS1
gene_set_query	429	ISL2	0.1338	GTEx Coexpression,0.1338	PYCARD,SRGN,IFITM2,MX2,ARHGDIB,CHST15,RAC2,GIMAP2,VAV1,TMEM71
gene_set_query	430	TIGD3	0.1339	ARCHS4 Coexpression,0.1339	IFITM2,CLEC7A,MX2,CHST15,RAC2,HLA-A,S100A9,HLA-E,TMEM154
gene_set_query	431	POU5F1	0.1341	Literature ChIP-seq,0.1341	APOBEC3G,LY96,HTR2C,PLA2G4A,FZD10,RORB,TBX5,ASCL2,BMP7,SULT1C2,SFRP1,IFI16,OLFML3,CLEC7A,ENPP2,CCL2,CSMD3,SNX5
gene_set_query	432	ZNF878	0.1344	GTEx Coexpression,0.1344	APOBEC3C,CD40,APOBEC3G,OAS2,OAS3,GINS4,MX1,ZNF257,IFI44L,MYO1G
gene_set_query	433	NR1D1	0.1346	Enrichr Queries,0.1346	IFITM3,TINAGL1,PIK3R1,PTGS2,NR3C1,IFIT3,ICAM1,LGALS3,CCND2,GPNMB,CCL2,PHLDA1,PLTP,TGM2,DUSP5,ANXA1,ANXA2,GPX3,EMP1,SORL1,CXCL10,MMP14,S100A6,S100A9,CD44
gene_set_query	434	BCL11A	0.1347	ReMap ChIP-seq,0.1347	DENND2D,SRGN,DUSP5,CD40,SPESP1,MACC1,ITPR1,ISG15,NR3C1,SORL1,PSMB8,ICAM1,CCND2,CDK6,MDFIC,RGS1,INPP5D,RAB34,IGF2BP3,SNX5,CD44,MYO1G
gene_set_query	435	HBP1	0.1351	ARCHS4 Coexpression,0.1351	PLSCR1,CLEC2B,RSAD2,PSTPIP2,KYNU,UBE2L6,IFI35,NR3C1,HLA-E
gene_set_query	436	HOXC4	0.1357	GTEx Coexpression,0.1357	GREM1,MMP14,ANXA2,TPM4,OLFML3,MYOF,IGF2BP3,XG,FBN1
gene_set_query	437	HSF5	0.136	Enrichr Queries,0.136	TINAGL1,DDX43,IKZF1,IFIT1,PTGS2,ETS1,HDAC9,ICAM1,PRDM16,ENPP2,IGF2BP1,CCL2,IGF2BP3,GBP4,DUSP5,RSAD2,MACC1,SORL1,CXCL10,OAS2,ELMO1,XAF1,BCAT1,GTSF1,SKAP1
gene_set_query	438	FOXD4L5	0.1363	GTEx Coexpression,0.1363	APOL6,MCTP1,MDFIC,GPX3,ACER3,PPARG,TACC1,PIK3R1,BMP6
gene_set_query	439	TEAD2	0.1368	Enrichr Queries,0.1368	IFITM3,IFITM2,TINAGL1,FHL2,PLAT,FBLN1,FBLN2,LGALS3,CCND2,CCL2,PHLDA1,TGM2,ANXA2,ANXA3,MYOF,EMP1,MSN,TM4SF1,BMP4,CXCL10,SFRP1,MMP14,RAB34,S100A6,CD44
gene_set_query	440	EBF1	0.1369	GTEx Coexpression,0.1369	DOCK11,TINAGL1,MDFIC,PPARG,KCTD12,NR3C1,FBLN2,APOL3,BMP6
gene_set_query	441	BBX	0.1375	GTEx Coexpression,0.1375	CCNB3,DNAH8,SPESP1,DDX43,PRAME,MAGEA3,GTSF1,DSCR8,MAGEA4
gene_set_query	442	GLI3	0.1376	ARCHS4 Coexpression,0.1376	GJC1,SFRP1,CCND2,PRDM16,MPPED2,ARHGDIB,RAC2,IGF2BP1,HLA-E
gene_set_query	443	ERG	0.1381	GTEx Coexpression,0.1381	TINAGL1,PLS3,MSN,IGFBP7,KCTD12,ETS1,TM4SF1,APOL3,BMP6
gene_set_query	444	ZNF280C	0.1388	GTEx Coexpression,0.1388	CCNB3,MAGEA1,IGF2BP1,DDX43,PRAME,MAGEA6,MAGEA3,MAGEA4,SSX1
gene_set_query	445	FERD3L	0.1394	GTEx Coexpression,0.1394	MMP14,OLFML3,ARSJ,MYOF,IFIT5,IGF2BP1,IL13RA2,XG,FBN1
gene_set_query	446	SOX4	0.1396	Enrichr Queries,0.1396	IFITM3,TINAGL1,FHL2,PIK3R1,PTGS2,ETS1,ICAM1,LGALS3,CCND2,CCL2,IGFBP7,PHLDA1,TGM2,DUSP5,ANXA1,ANXA2,TPM4,ANXA3,EMP1,TM4SF1,CXCL10,MMP14,CDK6,S100A6,CD44
gene_set_query	447	OLIG2	0.1402	Literature ChIP-seq,0.1402	HEXA,TYRP1,SEMA3E,ATP10A,PIK3R1,IL1RAP,AHR,GBA3,NR3C1,ETS1,PAPSS2,NCALD,CKMT2,SULT1C2,SERTAD4,CCND2,INPP5D,ARSJ,EPB41L3,EPSTI1,IGFBP7,PLTP,TP63,CHST9,ITGA1,MITF,TBX5,SORL1,ASS1,DKK3,BMP4,ARMCX1,COL2A1,ARMCX2,MDFIC,CLIP4,ELMO1,SPATS2L,TACC1,BCAT1,CPVL,TLR4,DNASE1L3,CD44
gene_set_query	448	RBPJ	0.1406	GTEx Coexpression,0.1406	DOCK11,PLSCR1,SP100,CLEC2B,IFI16,MSN,TACC1,KCTD12,APOL3
gene_set_query	449	ZNF528	0.141	Enrichr Queries,0.141	SLFN5,SAMD9L,SAMD9,IFI6,PIK3R1,AHR,IFIT1,DDX60,IFIT3,IFI44L,ICAM1,CCND2,GPNMB,OLFML3,EPSTI1,DUSP5,MX1,IFI44,SORL1,ASS1,CXCL10,XAF1,ZNF257,CD44,FBN1
gene_set_query	450	ZNF697	0.1413	GTEx Coexpression,0.1413	SLFN5,APOL6,SLFN11,MDFIC,TPM4,HEXA,ETS1,CTSC,FBN1
gene_set_query	451	BHLHE41	0.1413	ARCHS4 Coexpression,0.1413	GPNMB,RGS1,EPB41L3,LPCAT2,FHL1,IL18,CCL2,MITF,KCTD12
gene_set_query	452	SOHLH2	0.1417	Enrichr Queries,0.1417	IFITM1,TINAGL1,PTGS2,INPP5D,IGF2BP1,IGF2BP3,PITX2,MYOF,EMP1,MITF,BMP7,SORL1,ASS1,BST2,GREM1,CLDN10,CXCL10,COL2A1,VSNL1,ELMO1,PPARG,KCTD12,BCAT1,GTSF1,FBN1
gene_set_query	453	TSHZ2	0.1419	GTEx Coexpression,0.1419	BST2,SLFN11,MDFIC,PPARG,KCTD12,PLTP,TM4SF1,APOL3,BMP6
gene_set_query	454	HOXA10	0.1425	Enrichr Queries,0.1425	TINAGL1,FHL2,PIK3R1,PTGS2,NR3C1,ETS1,ICAM1,CCND2,CCL2,IGFBP7,IGF2BP3,PITX2,TGM2,ANXA1,GPX3,EMP1,PLA2G4A,PSMB8,BMP4,CXCL10,COL2A1,CDK6,PPARG,CD44,FBN1
gene_set_query	455	ZNF799	0.1425	GTEx Coexpression,0.1425	SRGN,SP100,IFI16,MX2,ARHGDIB,GIMAP2,LY96,TLR4,PSMB8
gene_set_query	456	MTERF4	0.1425	ARCHS4 Coexpression,0.1425	CPNE5,MYOF,ARHGDIB,GIMAP2,DAPP1,IKZF1,ZNF257,ETS1,HLA-E
gene_set_query	457	HIC2	0.1431	ARCHS4 Coexpression,0.1431	MAGEA12,SAGE1,NLRP2,IGF2BP1,PRAME,IGF2BP3,GTSF1,DSCR8,SSX1
gene_set_query	458	ZNF701	0.1431	GTEx Coexpression,0.1431	SRGN,SP100,IFITM2,MX2,ARHGDIB,GIMAP2,LY96,TRIM38,TLR4
gene_set_query	459	MSX2	0.1432	Enrichr Queries,0.1432	TINAGL1,FHL2,PTGS2,ETS1,FBLN2,CCND2,CCL2,PITX2,PHLDA1,TGM2,DUSP5,ANXA1,ANXA3,MYOF,EMP1,BMP7,TM4SF1,ASS1,BMP4,GREM1,CXCL10,SFRP1,COL2A1,PPARG,CD44
gene_set_query	460	ZFP28	0.1439	Enrichr Queries,0.1439	SAMD9L,TINAGL1,ITPR1,PIK3R1,PTGS2,HDAC9,IFIT3,ICAM1,LGALS3,CCND2,GPNMB,ENPP2,ANXA2,EMP1,SORL1,DKK3,CXCL10,PTPRE,SFRP1,CDK6,RAB34,KCTD12,BCAT1,CD44,FBN1
gene_set_query	461	FOXA1	0.1448	ReMap ChIP-seq,0.1448	ANXA1,ANXA2,SPESP1,MYOF,SEMA3E,CLDN1,SORL1,TM4SF1,PAPSS2,THSD4,BMP4,LGALS3,COL2A1,KRT15,RAB34,KYNU,CHST15,SPATS2L,S100P,PHLDA1,SNX5
gene_set_query	462	HOXD8	0.145	ARCHS4 Coexpression,0.145	DNAH8,SLC12A1,S100A6,EMP1,MITF,IGFBP7,XG,FBN1
gene_set_query	463	PBX3	0.145	GTEx Coexpression,0.145	GJC1,BST2,ARMCX1,CCND2,NRK,RAB34,ITGA1,RGN,PLA2G4A
gene_set_query	464	RAG1	0.1453	Enrichr Queries,0.1453	CD40,SAMD9L,TINAGL1,HFE,ITPR1,IL1RAP,IFIT1,PTGS2,ETS1,HDAC9,IFIT3,IFIT2,ICAM1,LGALS3,CCND2,EPSTI1,CCL2,ANXA1,RSAD2,ANXA2,SORL1,CXCL10,CDK6,S100A9,CD44
gene_set_query	465	IRX6	0.1456	GTEx Coexpression,0.1456	PPP1R14C,POF1B,GPNMB,PPARG,TNS4,CLDN1,TMPRSS13,TP63,XG
gene_set_query	466	ZNF257	0.146	Enrichr Queries,0.146	IFITM1,SAMD9L,SAMD9,LAMA1,DDX43,PLAT,IFIT1,PTGS2,HDAC9,IFIT3,IFI44L,GPNMB,IFI16,NLRP2,CCL2,IGF2BP3,GBP1,ANXA1,RSAD2,SORL1,BST2,CXCL10,OAS1,PPARG,XAF1
gene_set_query	467	HMX3	0.1462	GTEx Coexpression,0.1462	CD40,SH3KBP1,OAS2,HVCN1,OAS3,GINS4,MX1,HLA-DRA,IFI44L
gene_set_query	468	ZNF263	0.1463	Literature ChIP-seq,0.1463	DUSP5,CDK6,OAF,LAMA1,IL27RA
gene_set_query	469	MYC	0.1467	Enrichr Queries,0.1467	IFITM3,TINAGL1,FHL2,PIK3R1,AHR,PTGS2,NR3C1,ETS1,ICAM1,LGALS3,CCND2,CCL2,PHLDA1,TGM2,DUSP5,ANXA1,ANXA2,EMP1,CXCL10,CDK6,S100A6,PPARG,S100A9,CD44
gene_set_query	470	ATOH8	0.1468	ARCHS4 Coexpression,0.1468	GREM1,MMP14,TPM4,MYOF,FHL1,IGFBP7,FBLN2,FBN1
gene_set_query	471	SRY	0.1469	GTEx Coexpression,0.1469	POF1B,ANXA2,GPNMB,MYOF,CLDN1,TMPRSS13,TP63,CD44,XG
gene_set_query	472	TFAP2E	0.1474	ARCHS4 Coexpression,0.1474	APOBEC3C,BST2,PYCARD,INPP5D,ARHGDIB,RAC2,HLA-E,MYO1G
gene_set_query	473	HOXB5	0.1474	Enrichr Queries,0.1474	TINAGL1,FBLN1,PTGS2,ETS1,LGALS3,CCND2,OLFML3,ARHGDIB,CCL2,IGFBP7,PITX2,PHLDA1,TGM2,ANXA1,EMP1,BMP7,TM4SF1,BMP4,CXCL10,SFRP1,CDK6,S100A6,PPARG,CD44
gene_set_query	474	HOXC11	0.1475	GTEx Coexpression,0.1475	MMP14,POF1B,ANXA2,GPNMB,TPM4,MYOF,PAX3,XG,FBN1
gene_set_query	475	SOX10	0.148	ARCHS4 Coexpression,0.148	MAGEA12,GPNMB,OAF,TYRP1,MITF,IL13RA2,MAGEA2B,MAGEA4
gene_set_query	476	ARID5B	0.1481	Enrichr Queries,0.1481	IFITM3,IFITM1,TINAGL1,ITPR1,PIK3R1,AHR,PTGS2,NR3C1,ETS1,ICAM1,LGALS3,CCND2,CCL2,PHLDA1,TGM2,DUSP5,ANXA1,ANXA2,MYOF,EMP1,SORL1,CXCL10,CDK6,CD44
gene_set_query	477	CASZ1	0.1487	GTEx Coexpression,0.1487	SDR16C5,PPP1R14C,POF1B,IL18,TNS4,CLDN1,TMPRSS13,TP63,KLK11
gene_set_query	478	ZNF443	0.1489	Enrichr Queries,0.1489	TINAGL1,PIK3R1,PTGS2,ETS1,IFIT3,IFIT2,LGALS3,CCND2,GPNMB,IFI16,EPSTI1,CHST15,CCL2,IGF2BP3,PHLDA1,GBP3,DUSP5,ANXA1,IFI44,SORL1,CXCL10,CDK6,OAS1,TLR4
gene_set_query	479	NR1H2	0.1493	ARCHS4 Coexpression,0.1493	BST2,RAC2,MSN,IFI35,HLA-A,FXYD5,HLA-E,MYO1G
gene_set_query	480	ZNF212	0.1493	GTEx Coexpression,0.1493	TTC22,IL18,TACSTD2,DAPP1,SFN,FZD10,KLK10,KLK11,TMEM154
gene_set_query	481	PAX2	0.15	GTEx Coexpression,0.15	SULT1C2,GALNT14,BHMT2,PTPRO,SLC12A1,WDR72,GBA3,ASS1,SLC16A5
gene_set_query	482	TIGD2	0.1503	Enrichr Queries,0.1503	IFITM3,SAMD9L,TINAGL1,ITPR1,PIK3R1,AHR,IFIT1,PTGS2,NR3C1,IFIT3,IFIT2,CCND2,GPNMB,PHLDA1,CTSC,DUSP5,ANXA1,RSAD2,ANXA3,EMP1,SORL1,CXCL10,S100A6,KCTD12
gene_set_query	483	SMAD1	0.1505	ARCHS4 Coexpression,0.1505	IL4R,LPAR6,RAC2,IKZF1,HLA-A,CD200,BMP6,MYO1G
gene_set_query	484	ZNF432	0.151	Enrichr Queries,0.151	SLFN5,IFITM1,SAMD9L,SAMD9,PIK3R1,AHR,IFIT1,PTGS2,NR3C1,ETS1,HDAC9,IFI44L,ICAM1,GPNMB,PHLDA1,DUSP5,ANXA1,ITGA2,MX1,IFI44,CXCL10,CDK6,XAF1,CD44
gene_set_query	485	PGR	0.1511	ARCHS4 Coexpression,0.1511	OLFML3,GPX3,MYOF,PIK3R1,RORB,TMPRSS13,PAPSS2,THSD4
gene_set_query	486	E2F2	0.1512	GTEx Coexpression,0.1512	DENND2D,PYCARD,RAC2,DAPP1,IKZF1,JAK3,S100A9,VAV1,TMEM154
gene_set_query	487	SOX13	0.1515	ReMap ChIP-seq,0.1515	IL4R,ANXA2,CCL20,HFE,ITGA2,TMPRSS4,TM4SF1,NKD1,CDK6,OAF,INPP5D,RAB34,KYNU,IGF2BP1,SPATS2L,IGF2BP3,S100P,CPVL,DNASE1L3,PHLDA1,SLC16A5
gene_set_query	488	ZNF222	0.1517	Enrichr Queries,0.1517	IFITM1,SAMD9,IFI6,IFIT1,PTGS2,IFIT3,IFI44L,IFIT2,ICAM1,OASL,GPNMB,LAMP3,CCL2,GBP1,DUSP5,NQO1,ANXA1,IFI44,ISG15,BST2,CXCL10,IFI27,S100P,CD44
gene_set_query	489	SMYD3	0.1517	ARCHS4 Coexpression,0.1517	IL4R,SAGE1,GSTP1,PRAME,HLA-A,GTSF1,DSCR8,SSX1
gene_set_query	490	MYCL	0.1518	GTEx Coexpression,0.1518	SDR16C5,POF1B,IL18,TNS4,CLDN1,TMPRSS13,TP63,KLK11,TMEM154
gene_set_query	491	ZNF319	0.1523	ARCHS4 Coexpression,0.1523	IFITM2,IL4R,CHST15,RAC2,MSN,HLA-A,S100A9,HLA-E
gene_set_query	492	TBX3	0.1524	Enrichr Queries,0.1524	TINAGL1,PLAT,PIK3R1,PTGS2,ETS1,LGALS3,CCND2,CCL2,IGFBP7,PHLDA1,TGM2,DUSP5,ANXA1,ANXA2,MYOF,EMP1,MITF,TM4SF1,BMP4,CXCL10,SFRP1,PPARG,CD44,FBN1
gene_set_query	493	NEUROG2	0.1525	GTEx Coexpression,0.1525	CD40,APOBEC3G,SH3KBP1,OAS2,HVCN1,OAS3,GINS4,MX1,IFI44L
gene_set_query	494	HIVEP2	0.1529	ARCHS4 Coexpression,0.1529	SLFN5,APOL6,IL4R,IKZF1,PIK3R1,NR3C1,ETS1,SORL1
gene_set_query	495	OVOL2	0.1531	GTEx Coexpression,0.1531	SDR16C5,POF1B,IL18,B3GNT3,TACSTD2,TNS4,TMPRSS13,TP63,KLK11
gene_set_query	496	NFATC4	0.1536	ARCHS4 Coexpression,0.1536	GREM1,MMP14,TPM4,ZNF469,FBLN1,FBLN2,DKK3,FBN1
gene_set_query	497	SP5	0.1537	GTEx Coexpression,0.1537	MMP14,POF1B,GPNMB,TNS4,CLDN1,TMPRSS13,TP63,KLK11,XG
gene_set_query	498	ZNF114	0.1546	Enrichr Queries,0.1546	IFITM1,LAMA1,IFI6,IFIT1,PTGS2,ETS1,HDAC9,IFIT3,IFI44L,IFIT2,ICAM1,GPNMB,CCL2,DUSP5,ANXA3,CCL20,MX1,IL18,EMP1,BMP7,BST2,CXCL10,S100P,CPVL
gene_set_query	499	HOXD4	0.1548	ARCHS4 Coexpression,0.1548	CST1,ANXA2,TPM4,RAB34,PNMA5,S100A6,SOSTDC1,MAGEA2B
gene_set_query	500	ZNF93	0.1549	GTEx Coexpression,0.1549	APOBEC3C,APOBEC3G,SH3KBP1,OAS2,MX2,GINS4,RAC2,ZNF257,MYO1G
gene_set_query	501	PITX2	0.1553	Enrichr Queries,0.1553	TINAGL1,FHL2,PIK3R1,PTGS2,NR3C1,ETS1,CCND2,ENPP2,TGM2,DUSP5,ANXA1,ANXA3,GPX3,PAX3,PLA2G4A,TBX5,BMP7,BMP4,GREM1,CXCL10,SFRP1,COL2A1,PPARG,FBN1
gene_set_query	502	ZNF276	0.1554	ARCHS4 Coexpression,0.1554	IL4R,INPP5D,RAC2,IKZF1,HLA-A,ETS1,HLA-E,MYO1G
gene_set_query	503	MXD3	0.1556	GTEx Coexpression,0.1556	PYCARD,IFITM2,ARHGDIB,RAC2,GIMAP2,LY96,JAK3,VAV1,TMEM71
gene_set_query	504	TCF3	0.1562	GTEx Coexpression,0.1562	ZYG11A,SAGE1,DNAH8,MAGEA1,DDX43,PRAME,MAGEA6,MAGEA3,MAGEA4
gene_set_query	505	ZNF684	0.1567	Enrichr Queries,0.1567	SAMD9L,TINAGL1,SAMD9,IFIT5,IFI6,IFIT1,DDX60,IFIT3,IFI44L,IFI16,CCL2,PHLDA1,GBP1,GBP4,GBP3,DUSP5,IFI44,PLA2G4A,ISG15,CXCL10,PLSCR1,IFI27,OAS1,XAF1
gene_set_query	506	HOXC12	0.1572	ARCHS4 Coexpression,0.1572	MAGEA12,MYOF,SOSTDC1,MAGEA2B,MAGEA6,CSAG1,MAGEA3,MAGEA4
gene_set_query	507	ZNF490	0.1574	GTEx Coexpression,0.1574	PYCARD,APOBEC3G,MX2,ARHGDIB,RAC2,GIMAP2,VAV1,IL27RA,MYO1G
gene_set_query	508	ZNF544	0.1581	Enrichr Queries,0.1581	IFITM1,SP100,SAMD9,IFI6,FHL2,IFIT1,ETS1,IFIT3,IFI44L,IFIT2,APOL6,CCND2,IFI16,LAMP3,PHLDA1,DUSP5,MYOF,GINS4,MX1,ISG15,SORL1,CXCL10,OAS1,CD44
gene_set_query	509	ATF6B	0.1585	ARCHS4 Coexpression,0.1585	SULT1C2,IL4R,INPP5D,RAC2,MSN,HLA-A,HLA-E,MYO1G
gene_set_query	510	TP53	0.1585	Literature ChIP-seq,0.1585	DENND2D,CHST9,ANXA2,LAMA1,FHL2,FBLN1,SEMA3E,NR3C1,CLDN1,BMP7,HDAC9,THSD4,CCND2,FABP5,PSTPIP2,ARSJ,KYNU,MPPED2,EPSTI1,IGFBP7,SNX5,CD200
gene_set_query	511	HOXA9	0.1587	GTEx Coexpression,0.1587	LGALS3,PPP1R14C,POF1B,GPNMB,TNS4,CLDN1,TMPRSS13,TP63,XG
gene_set_query	512	ZNF234	0.1588	Enrichr Queries,0.1588	SLFN5,SP100,SAMD9L,SAMD9,IFI6,AHR,IFIT1,IFIT3,IFI44L,IFIT2,IFI16,LAMP3,CCL2,GBP4,DUSP5,ERAP2,MX1,IFI44,PARP14,CXCL10,CDK6,OAS1,TRIM38,XAF1
gene_set_query	513	ZNF586	0.1593	GTEx Coexpression,0.1593	PSTPIP2,MX2,ARHGDIB,RAC2,GIMAP2,IKZF1,JAK3,VAV1,TMEM71
gene_set_query	514	ZNF74	0.1609	ARCHS4 Coexpression,0.1609	GJC1,MYOF,IGF2BP1,MSN,PRAME,HLA-A,NR3C1,CD200
gene_set_query	515	ZKSCAN2	0.1615	ARCHS4 Coexpression,0.1615	PYCARD,ARHGDIB,RAC2,IGF2BP1,IGF2BP3,HLA-A,PSMB8,HLA-E
gene_set_query	516	ZNF488	0.1617	Enrichr Queries,0.1617	GALNT12,DUSP5,TINAGL1,ANXA3,ITGA2,FHL2,EMP1,IFIT1,PTGS2,CLDN1,IFIT3,ASS1,IFIT2,BMP4,CXCL10,SFRP1,VSNL1,OAS1,CCL2,PPARG,KCTD12,MATN2,TGM2
gene_set_query	517	OTX1	0.1618	GTEx Coexpression,0.1618	POF1B,TNS4,CLDN1,ASCL2,TMPRSS13,TP63,CD44,KLK11,TMEM154
gene_set_query	518	ZNF532	0.1622	ARCHS4 Coexpression,0.1622	GJC1,SFRP1,RAC2,IGF2BP1,IGF2BP3,IKZF1,HLA-A,HLA-E
gene_set_query	519	ZNF317	0.1628	ARCHS4 Coexpression,0.1628	DOCK11,SLFN11,ARHGDIB,RAC2,MSN,IKZF1,NR3C1,MYO1G
gene_set_query	520	ZNF788P	0.1631	Enrichr Queries,0.1631	DUSP5,IFITM1,TINAGL1,MX1,IFI6,FHL2,IFI44,IFIT1,CLDN1,ETS1,IFIT3,IFI44L,BST2,CXCL10,CCND2,LAMP3,IGF2BP3,XAF1,BCAT1,CPVL,PHLDA1,GBP1,TGM2
gene_set_query	521	ZBTB16	0.1638	Enrichr Queries,0.1638	DUSP5,TINAGL1,ANXA1,GPX3,EMP1,PIK3R1,PTGS2,ETS1,SORL1,IFIT3,LGALS3,CXCL10,SFRP1,CCND2,ENPP2,CCL2,PPARG,PHLDA1,S100A9,CD44,MATN2,TGM2,FBN1
gene_set_query	522	RARA	0.1646	ARCHS4 Coexpression,0.1646	IFITM2,IL4R,CLEC7A,CHST15,RAC2,HLA-A,S100A9,HLA-E
gene_set_query	523	POU3F2	0.1646	Literature ChIP-seq,0.1646	MCTP1,SEMA3D,RGS13,HFE,PTPRO,FHL2,RORB,AHR,KRT20,PTGS2,NR3C1,AGPAT4,SERTAD4,RGS1,SLCO1B3,SLITRK3,ENPP2,IGF2BP3,CSMD3,PITX2,MPZL2,CHST9,BCHE,ANXA1,PPP1R14C,ERAP2,MACC1,PLA2G4A,MITF,CDK6,CLEC2B,LPAR6,MPPED2,ELMO1,CNGB3,PPARG,GPRC5D
gene_set_query	524	ZBED3	0.1649	GTEx Coexpression,0.1649	DOCK11,TINAGL1,APOL6,MDFIC,GPX3,PPARG,TACC1,ASS1
gene_set_query	525	ZNF165	0.165	ReMap ChIP-seq,0.165	OAF,IL18,B3GNT3,ST3GAL6,TGM2
gene_set_query	526	MYF5	0.1652	ARCHS4 Coexpression,0.1652	ANXA2,OLFML3,ARSJ,S100A6,FHL2,SPATS2L,PITX2,FBN1
gene_set_query	527	MBNL2	0.1655	GTEx Coexpression,0.1655	DENND2D,PYCARD,HCP5,ARMCX1,NLRP2,DAPP1,TMEM154,SLC16A5
gene_set_query	528	BORCS8MEF2B	0.1658	ARCHS4 Coexpression,0.1658	IFITM2,IL4R,INPP5D,RAC2,HLA-A,S100A9,HLA-E,MYO1G
gene_set_query	529	ZNF575	0.1667	Enrichr Queries,0.1667	DUSP5,SP100,SAMD9L,TINAGL1,ANXA1,RSAD2,GPX3,IFI44,EMP1,ISG15,PIK3R1,PTGS2,NR3C1,IFIT3,IFI44L,IFIT2,LGALS3,CXCL10,OAF,S100A6,PHLDA1,CD44,GBP3
gene_set_query	530	SP2	0.1671	ARCHS4 Coexpression,0.1671	IFITM2,IL4R,RAC2,MSN,IKZF1,HLA-A,HLA-E,MYO1G
gene_set_query	531	NR5A2	0.1674	Enrichr Queries,0.1674	TINAGL1,EMP1,PLA2G4A,PIK3R1,AHR,PTGS2,NR3C1,ETS1,BMP7,SORL1,ICAM1,BMP4,CXCL10,CCND2,INPP5D,PRDM16,CCL2,PPARG,PITX2,BCAT1,PHLDA1,CD44,TGM2
gene_set_query	532	HLF	0.168	GTEx Coexpression,0.168	BCHE,SLITRK3,ITPR1,SEMA3E,TRIM38,HDAC9,CTSC,NCALD
gene_set_query	533	LTF	0.1686	GTEx Coexpression,0.1686	DENND2D,SLFN13,CD8B,INPP5D,RAC2,FXYD5,SKAP1,MYO1G
gene_set_query	534	ZNF502	0.1688	Enrichr Queries,0.1688	DUSP5,SLFN5,TINAGL1,ANXA1,ANXA3,FHL2,PTGS2,ETS1,HDAC9,SORL1,IFIT3,IFI44L,IFIT2,BMP4,CXCL10,PTPRE,SFRP1,CCND2,ENPP2,CCL2,KCTD12,XAF1,BCAT1
gene_set_query	535	NR6A1	0.1693	GTEx Coexpression,0.1693	DNAH8,MAGEA1,DDX43,PRAME,MAGEA3,GTSF1,DSCR8,MAGEA4
gene_set_query	536	ZNF503	0.1695	Enrichr Queries,0.1695	IFITM3,DUSP5,TINAGL1,ANXA1,EMP1,TM4SF1,IFIT2,BMP4,LGALS3,CXCL10,CCND2,CDK6,OAF,OLFML3,ARHGDIB,S100A6,CCL2,IGFBP7,KCTD12,PHLDA1,CD44,TGM2,FBN1
gene_set_query	537	HIVEP3	0.1699	GTEx Coexpression,0.1699	SDR16C5,POF1B,TNS4,CLDN1,TMPRSS13,TP63,CD44,TMEM154
gene_set_query	538	ESRRB	0.1701	ARCHS4 Coexpression,0.1701	FAM9B,SAGE1,MACC1,PRAME,CSAG1,GTSF1,DSCR8,SSX1
gene_set_query	539	PRDM8	0.1702	Enrichr Queries,0.1702	DUSP5,TINAGL1,ANXA1,ITPR1,FHL2,IFI44,EMP1,PTGS2,ETS1,SORL1,IFIT3,BMP6,NCALD,CXCL10,PTPRE,CCND2,CHST15,ENPP2,CCL2,KCTD12,PHLDA1,CD44,GBP4
gene_set_query	540	PBX1	0.1705	GTEx Coexpression,0.1705	GJC1,BCHE,ARMCX1,RAB34,ITGA1,SLITRK3,MITF,SEMA3E
gene_set_query	541	ZNF22	0.1711	GTEx Coexpression,0.1711	APOL6,MDFIC,IFIT5,PPARG,BCAT1,ETS1,TP63,APOL3
gene_set_query	542	ZNF563	0.1717	Enrichr Queries,0.1717	DUSP5,SLFN5,TINAGL1,GPX3,IFI44,AHR,IFIT1,PARP14,DDX60,HDAC9,IFIT3,IFI44L,IFIT2,CXCL10,SERTAD4,GPNMB,LAMP3,EPSTI1,ENPP2,IGFBP7,XAF1,CD44,TGM2
gene_set_query	543	ZNF92	0.1717	ReMap ChIP-seq,0.1717	TINAGL1,IL4R,TPM4,TACSTD2,EMP1,FBLN1,FBLN2,NKD1,DKK3,CDH3,KRT15,LPCAT2,RAC2,B3GNT3,ZNF469,IGFBP7,TNS4,JAK3,PLTP,TGM2
gene_set_query	544	ZFAT	0.1717	GTEx Coexpression,0.1717	APOBEC3C,CD40,APOBEC3G,OAS2,HVCN1,GINS4,IFI44L,MYO1G
gene_set_query	545	THAP10	0.172	ARCHS4 Coexpression,0.172	APOL6,INPP5D,ARHGDIB,RAC2,IKZF1,HLA-A,HLA-E,MYO1G
gene_set_query	546	GSC	0.1724	GTEx Coexpression,0.1724	DOCK11,MDFIC,PPARG,KCTD12,NR3C1,FBLN2,APOL3,BMP6
gene_set_query	547	ZFP92	0.173	GTEx Coexpression,0.173	BST2,CD40,SH3KBP1,OAS2,NRK,FAS,ETS1,TP63
gene_set_query	548	HMBOX1	0.1736	GTEx Coexpression,0.1736	BST2,ANKDD1A,SERTAD4,HVCN1,RGN,FAS,PARP14,PAPSS2
gene_set_query	549	EGR3	0.1738	Enrichr Queries,0.1738	DUSP5,TINAGL1,ANXA1,ANXA3,GPX3,FHL2,EMP1,PLAT,AHR,IFIT1,PTGS2,IFIT3,ICAM1,CXCL10,CCND2,GPNMB,RGS1,ENPP2,CCL2,KCTD12,PHLDA1,CD44,TGM2
gene_set_query	550	ZNF548	0.1742	GTEx Coexpression,0.1742	SP100,SLFN11,CLEC2B,MDFIC,NR3C1,SP140L,ETS1,APOL3
gene_set_query	551	NKX63	0.1744	ARCHS4 Coexpression,0.1744	CHST9,SLFN13,MAGEA12,PTGS2,MAGEA6,MAGEA3,HS6ST3
gene_set_query	552	ZNF716	0.1749	GTEx Coexpression,0.1749	DNAH8,SPESP1,DDX43,PRAME,COX7B2,GTSF1,DSCR8,MAGEA4
gene_set_query	553	ZNF229	0.1751	ARCHS4 Coexpression,0.1751	INPP5D,ARHGDIB,RAC2,HLA-A,OOEP,HLA-E,MYO1G
gene_set_query	554	BACH2	0.1751	ReMap ChIP-seq,0.1751	TPM4,GSTP1,HFE,MACC1,ITPR1,NR3C1,BMP7,SORL1,ICAM1,TMEM154,MMP14,CDK6,OAS1,CLEC7A,ARHGDIB,SLC9A9,CHST15,SKAP1,SNX5,MYO1G
gene_set_query	555	ARID3B	0.1755	GTEx Coexpression,0.1755	APOBEC3G,HVCN1,MX2,RAC2,IKZF1,SKAP1,VAV1,MYO1G
gene_set_query	556	HOXC13	0.1761	GTEx Coexpression,0.1761	POF1B,GPNMB,TNS4,GPRC5D,CLDN1,TMPRSS13,TP63,XG
gene_set_query	557	ZNF365	0.1766	Enrichr Queries,0.1766	DUSP5,TINAGL1,GPX3,ITPR1,FHL2,EMP1,PIK3R1,PTGS2,HDAC9,SORL1,NCALD,ICAM1,DKK3,CXCL10,PTPRE,SERTAD4,CCND2,ENPP2,CCL2,PHLDA1,CD44,MATN2,TGM2
gene_set_query	558	NKX23	0.1767	GTEx Coexpression,0.1767	GJC1,GALNT12,RTP4,SLFN13,CD163L1,UBXN10,ITGA1,PLA2G4A
gene_set_query	559	ESR2	0.1768	Literature ChIP-seq,0.1768	DENND2D,MX1,MITF,SEMA3E,BMP7,CDH3,CDK6,PSTPIP2,KRT15,KYNU,ACER3,S100P,TGM2
gene_set_query	560	ZNF155	0.1769	ARCHS4 Coexpression,0.1769	CCNB3,IFITM2,EPSTI1,NLRP2,SKAP1,OOEP,BMP6
gene_set_query	561	NHLH1	0.1773	GTEx Coexpression,0.1773	PYCARD,IFITM2,ARHGDIB,RAC2,LY96,JAK3,SORL1,VAV1
gene_set_query	562	HEYL	0.1774	Enrichr Queries,0.1774	TINAGL1,GPX3,ITGA1,FHL2,EMP1,PLAT,FBLN1,ETS1,FBLN2,TM4SF1,DKK3,CXCL10,SFRP1,MMP14,CCND2,OLFML3,S100A6,CCL2,IGFBP7,PLTP,CD44,TGM2,FBN1
gene_set_query	563	ZNF676	0.1775	ARCHS4 Coexpression,0.1775	ZYG11A,NLRP2,MSN,DDX43,ZNF257,COX7B2,SNX5
gene_set_query	564	SP8	0.178	GTEx Coexpression,0.178	PPP1R14C,POF1B,TNS4,CLDN1,ASCL2,TMPRSS13,TP63,KLK11
gene_set_query	565	ZNF215	0.1781	Enrichr Queries,0.1781	DUSP5,TINAGL1,GINS4,FHL2,IFIT1,PARP14,PTGS2,ETS1,HDAC9,SORL1,IFIT3,IFI44L,FERMT1,CXCL10,CCND2,VSNL1,OAS3,EPSTI1,PPARG,BCAT1,CTSC,CD44,TGM2
gene_set_query	566	MAFG	0.1785	ReMap ChIP-seq,0.1785	IFITM3,SRGN,ANXA1,RSAD2,ANXA2,HFE,IL18,MITF,KRT5,IFIT3,BMP6,DKK3,CCNB3,CDK6,KRT15,TRIM38,BCAT1,SNX5,CTSC,SLC16A5
gene_set_query	567	ZNF273	0.1786	GTEx Coexpression,0.1786	PPP1R14C,POF1B,IL18,TNS4,CLDN1,TMPRSS13,TP63,KLK11
gene_set_query	568	ZNF516	0.1787	ARCHS4 Coexpression,0.1787	BCHE,CLEC7A,LRRK2,TLR4,COX7B2,SORL1,TMEM154
gene_set_query	569	ZNF613	0.1788	Enrichr Queries,0.1788	DUSP5,SLFN5,SAMD9L,TINAGL1,ANXA1,ANXA3,MX1,FHL2,IFI44,PIK3R1,IFIT1,PARP14,PTGS2,IFIT3,IFIT2,ICAM1,OASL,CXCL10,OAS1,LPAR6,CCL2,XAF1,PHLDA1
gene_set_query	570	ZNF385D	0.1792	GTEx Coexpression,0.1792	TINAGL1,PRDM16,ITPR1,PLS3,IGFBP7,ATP10A,IL13RA2,HDAC9
gene_set_query	571	ZNF560	0.1795	Enrichr Queries,0.1795	ZYG11A,PPP1R14C,RSAD2,LAMA1,NRK,DDX43,FBLN1,PTGS2,FBLN2,BMP7,IFIT3,IFI44L,BMP4,CLDN10,CXCL10,SFRP1,COL2A1,GPNMB,EPB41L3,NLRP2,PPARG,PITX2,ZNF257
gene_set_query	572	ZSCAN4	0.1805	GTEx Coexpression,0.1805	PPP1R14C,POF1B,GPNMB,TNS4,CLDN1,TMPRSS13,TP63,KLK11
gene_set_query	573	ZNF850	0.1811	GTEx Coexpression,0.1811	APOBEC3C,CD40,SP100,MDFIC,OAS2,GINS4,FAS,ZNF257
gene_set_query	574	JAZF1	0.1812	ARCHS4 Coexpression,0.1812	CLEC7A,LRRK2,TLR4,SORL1,OOEP,HLA-E,TMEM154
gene_set_query	575	ZNF610	0.1816	Enrichr Queries,0.1816	DUSP5,SLFN5,SAMD9L,SAMD9,MX1,IFI6,IFI44,IFIT1,DDX60,SORL1,IFIT3,IFI44L,NCALD,BMP4,CXCL10,CCND2,GPNMB,OAS1,ENPP2,CCL2,XAF1,MATN2,GBP3
gene_set_query	576	FOXI3	0.1817	GTEx Coexpression,0.1817	PPP1R14C,POF1B,SOSTDC1,TNS4,CLDN1,ASCL2,TMPRSS13,TP63
gene_set_query	577	PAX1	0.1818	ARCHS4 Coexpression,0.1818	KRT15,ITGA2,EPB41L3,PLAT,PIK3R1,PLTP,TP63
gene_set_query	578	ZNF786	0.1823	Enrichr Queries,0.1823	DUSP5,IFITM1,SAMD9L,IFITM2,TINAGL1,ERAP2,IL18,IFI6,FHL2,DAPP1,ISG15,SEMA3E,AHR,IFIT1,SORL1,IFIT3,IFIT2,ICAM1,CXCL10,CHST15,CCL2,PHLDA1
gene_set_query	579	ZNF728	0.1824	ARCHS4 Coexpression,0.1824	ITPR1,NLRP2,MSN,DDX43,ZNF257,COX7B2,OOEP
gene_set_query	580	SALL4	0.1829	Literature ChIP-seq,0.1829	CD163L1,HEXA,TMPRSS4,PTGS2,NR3C1,CLDN1,CCNB3,SDR16C5,SERTAD4,APOL6,EPB41L3,ARHGDIB,CCL2,IGFBP7,PITX2,CTSC,MACC1,PAX3,PLA2G4A,MITF,TM4SF1,TMEM154,PTPRE,LPAR6,MPPED2,CLIP4,ELMO1,FAS,TACC1,SMTNL2,BCAT1,CD44
gene_set_query	581	E2F6	0.183	ARCHS4 Coexpression,0.183	IFITM2,INPP5D,ARHGDIB,RAC2,HLA-A,SORL1,HLA-E
gene_set_query	582	ZBTB25	0.1836	GTEx Coexpression,0.1836	SLFN13,CD40,APOBEC3G,PLEKHA2,HLA-DRA,PARP14,SKAP1,MYO1G
gene_set_query	583	IRF3	0.1837	ARCHS4 Coexpression,0.1837	IL4R,INPP5D,RAC2,HLA-A,ETS1,HLA-E,MYO1G
gene_set_query	584	NR0B1	0.1838	Enrichr Queries,0.1838	BCHE,IFITM1,TINAGL1,ANXA1,LAMA1,MITF,PTGS2,NR3C1,BMP7,ASS1,BMP4,LGALS3,CXCL10,SFRP1,CDK6,MPPED2,ARHGDIB,CCL2,PPARG,IGFBP7,PITX2,PHLDA1
gene_set_query	585	ZNF679	0.1845	Enrichr Queries,0.1845	IFITM3,SP100,SAMD9,ERAP2,IFI6,DAPP1,LY96,SEMA3E,ATP10A,PTGS2,BMP7,TMEM154,CXCL10,GPNMB,KYNU,EPB41L3,CHST15,NLRP2,CCL2,S100P,CPVL,PHLDA1
gene_set_query	586	ZNF626	0.1852	Enrichr Queries,0.1852	SRGN,DUSP5,SLFN5,IFITM1,IFI6,IFI44,PIK3R1,AHR,IFIT1,HDAC9,SORL1,IFIT3,IFI44L,SLFN13,CXCL10,CCND2,OAS1,OAS2,ENPP2,ST3GAL6,ZNF257,GBP4
gene_set_query	587	SP6	0.1855	ARCHS4 Coexpression,0.1855	DUSP5,TINAGL1,CDH3,B3GNT3,NLRP2,S100P,TMPRSS13
gene_set_query	588	HOXB3	0.1859	Enrichr Queries,0.1859	TINAGL1,ANXA3,FHL2,EMP1,PTGS2,ETS1,THSD4,BMP4,LGALS3,CXCL10,SFRP1,MMP14,CCND2,CDK6,PRDM16,CCL2,PPARG,PITX2,PHLDA1,CD44,TGM2,FBN1
gene_set_query	589	SOX21	0.1861	GTEx Coexpression,0.1861	SDR16C5,POF1B,IL18,BMP7,TMPRSS13,TP63,KLK11,TMEM154
gene_set_query	590	ZFP42	0.1861	ARCHS4 Coexpression,0.1861	GJC1,SFRP1,GINS4,NLRP2,IGF2BP1,IGF2BP3,BCAT1
gene_set_query	591	HAND2	0.1866	Enrichr Queries,0.1866	BCHE,TINAGL1,ANXA1,PAX3,PLAT,TBX5,ETS1,FBLN2,BMP7,BMP4,GREM1,CXCL10,SFRP1,CCND2,OLFML3,MPPED2,ARHGDIB,CCL2,PPARG,IGFBP7,PITX2,FBN1
gene_set_query	592	ZNF217	0.1867	GTEx Coexpression,0.1867	DENND2D,HCP5,SP100,IFI16,DAPP1,TRIM38,CD44,PSMB8
gene_set_query	593	NKX21	0.1867	ARCHS4 Coexpression,0.1867	SDR16C5,ANXA3,LAMP3,LRRK2,PLS3,HDAC9,MPZL2
gene_set_query	594	FOXI1	0.1873	Enrichr Queries,0.1873	DUSP5,TINAGL1,TMPRSS4,TACSTD2,MITF,PTGS2,CLDN1,ETS1,BMP7,CLDN10,CXCL10,SFRP1,RGS1,KRT15,PRDM16,SOSTDC1,CCL2,PPARG,PITX2,PHLDA1,S100A9,SULT1C4
gene_set_query	595	AEBP1	0.1873	ARCHS4 Coexpression,0.1873	MMP14,TPM4,ZNF469,FBLN1,IGFBP7,FBLN2,FBN1
gene_set_query	596	ARNT2	0.188	Enrichr Queries,0.188	DUSP5,FHL2,EMP1,PLA2G4A,PLAT,PTGS2,ETS1,SORL1,NCALD,DKK3,CXCL10,SFRP1,CCND2,CDK6,GPNMB,ENPP2,CCL2,KCTD12,PHLDA1,CD44,MATN2,FBN1
gene_set_query	597	ZNF57	0.1886	GTEx Coexpression,0.1886	SDR16C5,POF1B,IL18,TNS4,CLDN1,TMPRSS13,TP63,KLK11
gene_set_query	598	HOXC9	0.1895	Enrichr Queries,0.1895	TINAGL1,FHL2,EMP1,PLAT,PTGS2,ETS1,FBLN2,IFIT3,BMP4,GREM1,LGALS3,CXCL10,SFRP1,MMP14,COL2A1,SERTAD4,CCND2,CCL2,PPARG,PITX2,CD44,FBN1
gene_set_query	599	ZNF589	0.1898	ARCHS4 Coexpression,0.1898	GJC1,SFRP1,MYOF,GINS4,IGF2BP1,IGF2BP3,BCAT1
gene_set_query	600	ZIC3	0.1904	ARCHS4 Coexpression,0.1904	GJC1,SFRP1,ARMCX2,IGF2BP1,PLS3,IGF2BP3,BCAT1
gene_set_query	601	ATF6	0.191	ARCHS4 Coexpression,0.191	SP100,CLEC7A,LPCAT2,PPARG,KCTD12,TRIM38,TLR4
gene_set_query	602	ZNF121	0.191	GTEx Coexpression,0.191	IL18,TACSTD2,SFN,TNS4,CLDN1,TMPRSS13,TP63,KLK11
gene_set_query	603	HEY2	0.1923	ARCHS4 Coexpression,0.1923	GJC1,CKMT2,ARHGDIB,RAC2,IKZF1,BMP7,HLA-E
gene_set_query	604	FOXH1	0.1929	ARCHS4 Coexpression,0.1929	SFRP1,ARMCX2,NLRP2,IGF2BP1,MSN,IGF2BP3,NCALD
gene_set_query	605	MEIS2	0.193	Enrichr Queries,0.193	TINAGL1,ANXA1,ITPR1,FHL2,EMP1,PIK3R1,PTGS2,NR3C1,ETS1,NCALD,DKK3,CXCL10,SFRP1,CCND2,CDK6,MPPED2,ENPP2,IGFBP7,KCTD12,PHLDA1,CD44,FBN1
gene_set_query	606	ZNF223	0.1937	Enrichr Queries,0.1937	IFITM3,DUSP5,IFITM1,IFITM2,SAMD9,ERAP2,MX1,IL18,IFI6,IFI44,DAPP1,ISG15,SEMA3E,AHR,IFIT1,PTGS2,IFIT3,IFI44L,CXCL10,EPSTI1,CHST15,CD44
gene_set_query	607	TCF4	0.1944	Enrichr Queries,0.1944	IFITM3,ANXA1,ANXA2,ITPR1,EMP1,PIK3R1,AHR,PTGS2,NR3C1,ETS1,HDAC9,CXCL10,CCND2,CDK6,ENPP2,CCL2,IGFBP7,KCTD12,BCAT1,PHLDA1,CD44,FBN1
gene_set_query	608	EGR4	0.1947	ARCHS4 Coexpression,0.1947	KRT222,CHST9,GDA,GPX3,ENPP2,PAPSS2,HS6ST3
gene_set_query	609	ZEB1	0.1949	ENCODE ChIP-seq,0.1949	SP100,TINAGL1,ITGA1,B3GNT3,SORL1
gene_set_query	610	HNF4G	0.1952	Enrichr Queries,0.1952	BCHE,TINAGL1,ANXA1,ANXA3,ITGA2,PLA2G4A,MITF,PIK3R1,PTGS2,NR3C1,ETS1,HDAC9,PAPSS2,FERMT1,CXCL10,POF1B,UGT2A3,PPARG,PITX2,SULT1C4,MATN2,GBP3
gene_set_query	611	SALL1	0.1959	ARCHS4 Coexpression,0.1959	GJC1,SFRP1,CCND2,ARMCX2,RAC2,IGF2BP1,IGF2BP3
gene_set_query	612	ZFP3	0.1966	Enrichr Queries,0.1966	DUSP5,SLFN5,SAMD9L,TINAGL1,ANXA1,MX1,EMP1,PIK3R1,IFIT1,NR3C1,ETS1,SORL1,IFIT3,IFIT2,CXCL10,GPNMB,MPPED2,PPARG,KCTD12,BCAT1,PHLDA1,CD44
gene_set_query	613	TGIF2LX	0.1972	ARCHS4 Coexpression,0.1972	DNAH8,MAGEA1,IL1RAP,IFIT1,COX7B2,GTSF1,OOEP
gene_set_query	614	ETV1	0.1973	Enrichr Queries,0.1973	DUSP5,TINAGL1,FHL2,EMP1,PLA2G4A,PIK3R1,PTGS2,NR3C1,ETS1,HDAC9,BMP4,CXCL10,SFRP1,CCND2,CDK6,ENPP2,PPARG,KCTD12,PHLDA1,CD44,TGM2,FBN1
gene_set_query	615	CEBPE	0.1978	ARCHS4 Coexpression,0.1978	SRGN,IFITM2,LPCAT2,RAC2,HLA-A,S100A9,MYO1G
gene_set_query	616	RFX2	0.198	Enrichr Queries,0.198	IFITM3,TINAGL1,ANXA1,ANXA2,MYOF,ITPR1,EMP1,FBLN1,PIK3R1,PTGS2,NR3C1,ETS1,SORL1,ICAM1,LGALS3,CXCL10,SFRP1,CCND2,PRDM16,BCAT1,PHLDA1,CD44
gene_set_query	617	HOXA5	0.1987	Enrichr Queries,0.1987	DUSP5,TINAGL1,ANXA1,GPX3,FHL2,EMP1,PLAT,PTGS2,NR3C1,ETS1,ICAM1,BMP4,CXCL10,SFRP1,CCND2,OLFML3,ENPP2,CCL2,PPARG,PHLDA1,CD44,MATN2
gene_set_query	618	RREB1	0.1991	GTEx Coexpression,0.1991	TTC22,GSTP1,TACSTD2,SFN,KRT5,TP63,KLK11,MPZL2
gene_set_query	619	DDIT3	0.1994	Enrichr Queries,0.1994	IFITM3,DUSP5,TINAGL1,ANXA1,RSAD2,ANXA2,EMP1,ISG15,IFIT1,PTGS2,IFIT3,ASS1,IFIT2,ICAM1,LGALS3,CXCL10,CCND2,GPNMB,CCL2,PHLDA1,CD44,TGM2
gene_set_query	620	DMRTC2	0.1998	GTEx Coexpression,0.1998	DNAH8,SPESP1,DDX43,PRAME,COX7B2,GTSF1,DSCR8,MAGEA4
gene_set_query	621	KDM5B	0.2002	ARCHS4 Coexpression,0.2002	ARHGDIB,RAC2,IGF2BP1,IGF2BP3,HLA-A,PSMB8,HLA-E
gene_set_query	622	NFE4	0.2004	GTEx Coexpression,0.2004	PYCARD,SRGN,IFITM2,ARHGDIB,LY96,JAK3,VAV1,TMEM71
gene_set_query	623	HMX2	0.201	GTEx Coexpression,0.201	CD40,OAS2,HVCN1,OAS3,GINS4,MX1,HLA-DRA,IFI44L
gene_set_query	624	NAIF1	0.2015	ARCHS4 Coexpression,0.2015	LGALS3,SLFN13,HVCN1,NLRP2,FXYD5,TRIM38,ZNF257
gene_set_query	625	CCDC17	0.2016	GTEx Coexpression,0.2016	CHST9,SLFN13,IFITM2,CLEC7A,UBXN10,VAV1,HLA-E,SLC16A5
gene_set_query	626	CGGBP1	0.2021	ARCHS4 Coexpression,0.2021	MDFIC,GIMAP2,DAPP1,MSN,IKZF1,ETS1,BMP6
gene_set_query	627	ZNF14	0.2023	Enrichr Queries,0.2023	IFITM3,DUSP5,IFITM1,IFITM2,ANXA1,ERAP2,IL18,IFI6,IFI44,DAPP1,ISG15,SEMA3E,AHR,IFIT1,PTGS2,DDX60,IFIT3,IFIT2,CXCL10,S100A6,PHLDA1
gene_set_query	628	YY2	0.2033	ARCHS4 Coexpression,0.2033	CCNB3,DDX43,GTSF1,OOEP,DSCR8,HLA-E
gene_set_query	629	CTCF	0.2034	ENCODE ChIP-seq,0.2034	LY6K,GALNT14,MCTP1,SH3KBP1,GDA,SEMA3D,LAMA1,UBE2L6,CLDN1,IFIT2,IL27RA,OLFML3,SFN,IGFBP7,TGM2,MYOF,GINS4,SORL1,PTPRE,MMP14,ARMCX1,CDK6,B3GNT3,S100A6,ELMO1,PPARG,TACC1,KCTD12,SMTNL2,DNASE1L3,CD200,MATN2
gene_set_query	630	ZNF552	0.2035	GTEx Coexpression,0.2035	PYCARD,IFITM2,ANXA3,ARHGDIB,RAC2,VAV1,TMEM71,SLC16A5
gene_set_query	631	ZNF177	0.2037	Enrichr Queries,0.2037	DUSP5,IFI6,IFI44,ISG15,PIK3R1,IFIT1,PTGS2,IFIT3,IFI44L,CXCL10,CDK6,IFI27,GPNMB,IFI16,LAMP3,EPB41L3,PRDM16,CCL2,GBP1,MATN2,GBP3
gene_set_query	632	POU1F1	0.2039	ARCHS4 Coexpression,0.2039	KRT222,OLFML3,RGS1,SEMA3D,SLITRK3,TRIM38
gene_set_query	633	LHX6	0.2051	Enrichr Queries,0.2051	DUSP5,TINAGL1,FHL2,EMP1,ETS1,FBLN2,BMP7,BMP6,ASS1,BMP4,CXCL10,SFRP1,CCND2,PRDM16,ENPP2,CCL2,PPARG,KCTD12,CD200,TGM2,FBN1
gene_set_query	634	GLIS2	0.2052	ARCHS4 Coexpression,0.2052	MMP14,MYOF,ZNF469,IGFBP7,FBLN2,FBN1
gene_set_query	635	ZFHX4	0.2054	GTEx Coexpression,0.2054	DENND2D,HCP5,ARMCX1,OLFML3,DAPP1,SLC16A5,FBN1
gene_set_query	636	HOXC8	0.2058	Enrichr Queries,0.2058	TINAGL1,ANXA1,FHL2,EMP1,PTGS2,ETS1,FBLN2,IFIT3,TM4SF1,BMP4,CXCL10,SFRP1,COL2A1,CCND2,GPNMB,CCL2,PPARG,IGFBP7,PITX2,PHLDA1,FBN1
gene_set_query	637	IKZF5	0.2064	ARCHS4 Coexpression,0.2064	CLEC2B,MYOF,ARHGDIB,IKZF1,NR3C1,ETS1
gene_set_query	638	BARX1	0.2072	GTEx Coexpression,0.2072	GJC1,GALNT12,BMP4,GREM1,UBXN10,ITGA1,SEMA3E
gene_set_query	639	HOXD10	0.2073	Enrichr Queries,0.2073	TINAGL1,ANXA1,GPX3,PAX3,PLAT,MITF,PTGS2,ETS1,IFIT3,BMP4,GREM1,LGALS3,CXCL10,SFRP1,COL2A1,CCND2,IGF2BP1,CCL2,PPARG,PITX2,FBN1
gene_set_query	640	TEAD3	0.2076	ARCHS4 Coexpression,0.2076	MMP14,TINAGL1,TPM4,MYOF,FBLN2,FBN1
gene_set_query	641	CREB1	0.2078	GTEx Coexpression,0.2078	DOCK11,SP100,IFI16,MSN,TRIM38,NR3C1,ETS1
gene_set_query	642	NR2F1	0.208	Enrichr Queries,0.208	TINAGL1,ANXA1,FHL2,EMP1,PLAT,PIK3R1,PTGS2,ETS1,BMP4,CXCL10,SFRP1,CCND2,OLFML3,ENPP2,CCL2,IGFBP7,PHLDA1,CD44,MATN2,TGM2,FBN1
gene_set_query	643	CLOCK	0.2082	ARCHS4 Coexpression,0.2082	ITGA2,ARHGDIB,RAC2,DDX43,OOEP,HLA-E
gene_set_query	644	ZNF524	0.2088	ARCHS4 Coexpression,0.2088	PYCARD,IFITM2,RAC2,HLA-A,HLA-E,MYO1G
gene_set_query	645	NR5A1	0.2091	GTEx Coexpression,0.2091	BST2,ANKDD1A,CD163L1,NRK,RGN,DNASE1L3,PAPSS2
gene_set_query	646	NR1H4	0.2094	Enrichr Queries,0.2094	IFITM3,BCHE,TINAGL1,ANXA1,GPX3,BHMT2,PTGS2,ETS1,PAPSS2,ASS1,LGALS3,CXCL10,KYNU,RGN,ENPP2,UGT2A3,CCL2,PPARG,CD44,SULT1C4,TGM2
gene_set_query	647	ZNF335	0.2095	ARCHS4 Coexpression,0.2095	IL4R,INPP5D,IKZF1,HLA-A,HLA-E,MYO1G
gene_set_query	648	KDM2A	0.2101	ARCHS4 Coexpression,0.2101	IL4R,MSN,IKZF1,HLA-A,ETS1,MYO1G
gene_set_query	649	ZNF578	0.2103	GTEx Coexpression,0.2103	TPM4,OLFML3,LAMA1,ARSJ,IGF2BP1,IL13RA2,FBN1
gene_set_query	650	TET1	0.2119	ARCHS4 Coexpression,0.2119	GJC1,NLRP2,IGF2BP1,IGF2BP3,HLA-A,BCAT1
gene_set_query	651	NR4A1	0.2123	Enrichr Queries,0.2123	IFITM3,DUSP5,TINAGL1,ANXA1,ANXA2,GPX3,EMP1,PLAT,PTGS2,IFIT3,ICAM1,LGALS3,CXCL10,CCND2,RGS1,ENPP2,S100A6,CCL2,PHLDA1,CD44,TGM2
gene_set_query	652	ZNF76	0.2131	ARCHS4 Coexpression,0.2131	INPP5D,RAC2,IKZF1,HLA-A,HLA-E,MYO1G
gene_set_query	653	HOXA4	0.2134	GTEx Coexpression,0.2134	BCHE,FHL1,ITGA1,TACC1,MITF,SEMA3E,HDAC9
gene_set_query	654	ZNF281	0.2138	ARCHS4 Coexpression,0.2138	GJC1,SFRP1,IGF2BP1,IGF2BP3,BCAT1,NCALD
gene_set_query	655	HOXA11	0.2144	Enrichr Queries,0.2144	TINAGL1,ANXA1,EMP1,PAX3,PTGS2,ETS1,PSMB8,ICAM1,BMP4,GREM1,CXCL10,SFRP1,COL2A1,CCND2,CDK6,OLFML3,PRDM16,CCL2,PPARG,PITX2,FBN1
gene_set_query	656	SALL2	0.215	ARCHS4 Coexpression,0.215	GJC1,SFRP1,ARMCX2,IGF2BP1,IGF2BP3,BCAT1
gene_set_query	657	ZNF334	0.2151	Enrichr Queries,0.2151	TINAGL1,RSAD2,ANXA3,LAMA1,IFI44,PTGS2,CLDN1,BMP7,IFI44L,NCALD,SLFN13,CXCL10,SFRP1,CCND2,MPPED2,ENPP2,CCL2,PPARG,PLTP,CES1,MATN2
gene_set_query	658	SKIL	0.2158	Enrichr Queries,0.2158	DUSP5,TINAGL1,ANXA1,ANXA2,TPM4,ANXA3,EMP1,PIK3R1,AHR,PTGS2,NR3C1,ETS1,ICAM1,LGALS3,CXCL10,CCND2,CDK6,CCL2,PHLDA1,CD44,TGM2
gene_set_query	659	MYRFL	0.2162	ARCHS4 Coexpression,0.2162	POF1B,GDA,TTC22,B3GNT3,GBA3,KRT20
gene_set_query	660	HIF3A	0.2166	GTEx Coexpression,0.2166	GJC1,RAB34,ITGA1,TACC1,SEMA3E,PIK3R1,NKD1
gene_set_query	661	LIN28A	0.2168	ARCHS4 Coexpression,0.2168	GJC1,SFRP1,ARMCX2,IGF2BP1,IGF2BP3,BCAT1
gene_set_query	662	ZNF235	0.2179	Enrichr Queries,0.2179	NQO1,SAMD9L,TINAGL1,ITPR1,FHL2,IFI44,EMP1,PIK3R1,IFIT1,PARP14,SORL1,IFIT3,IFIT2,CXCL10,CCND2,CDK6,ENPP2,XAF1,PHLDA1,CD44,GBP3
gene_set_query	663	NR3C2	0.2181	ARCHS4 Coexpression,0.2181	POF1B,GDA,B3GNT3,GBA3,KRT20,OOEP
gene_set_query	664	LIN54	0.2184	GTEx Coexpression,0.2184	SAMD9,RAC2,DAPP1,IL1RAP,S100A9,SORL1,TMEM154
gene_set_query	665	PITX3	0.2187	ARCHS4 Coexpression,0.2187	CKMT2,MCTP1,IFI27,FHL1,SMTNL2,CPVL
gene_set_query	666	THRB	0.219	GTEx Coexpression,0.219	ARMCX1,FHL1,ITPR1,RORB,HDAC9,NCALD,HS6ST3
gene_set_query	667	ZNF43	0.2194	Enrichr Queries,0.2194	DUSP5,TINAGL1,ANXA1,IFI44,PIK3R1,AHR,HDAC9,SORL1,IFIT3,IFI44L,CXCL10,CCND2,CDK6,ENPP2,CCL2,IGF2BP3,XAF1,ZNF257,PHLDA1,CD44
gene_set_query	668	NANOG	0.2195	Literature ChIP-seq,0.2195	RTP4,IFITM1,GALNT14,IFITM2,DAPP1,LY96,PLAT,FZD10,NR3C1,CDH3,IGF2BP3,GBP1,SNX5,NQO1,ITGA1,BMP4,SFRP1,PLSCR1,ARMCX1,CDK6,LPAR6,OAS2,ELMO1,MYO1G
gene_set_query	669	ZBTB33	0.2197	GTEx Coexpression,0.2197	POF1B,MACC1,DAPP1,CLDN1,TP63,KLK11,TMEM154
gene_set_query	670	MYOD1	0.2199	ARCHS4 Coexpression,0.2199	CKMT2,FHL1,SPATS2L,SMTNL2,ASS1,DKK3
gene_set_query	671	NCOA3	0.2209	GTEx Coexpression,0.2209	CD40,SP100,IFI16,OAS2,OAS3,HLA-DRA,TRIM38
gene_set_query	672	RXRA	0.2217	ARCHS4 Coexpression,0.2217	IFITM2,CHST15,HLA-A,TLR4,S100A9,HLA-E
gene_set_query	673	PAX6	0.2224	ARCHS4 Coexpression,0.2224	CHST9,GPX3,ENPP2,MSN,ANO5,PAPSS2
gene_set_query	674	ZNF521	0.2229	Enrichr Queries,0.2229	BCHE,ANXA1,EMP1,PLA2G4A,FBLN1,PTGS2,ETS1,FBLN2,CXCL10,SFRP1,CCND2,GPNMB,OLFML3,EPB41L3,ENPP2,CCL2,IGFBP7,PHLDA1,MATN2,FBN1
gene_set_query	675	KLF14	0.2236	ARCHS4 Coexpression,0.2236	TINAGL1,GABRA3,DDX43,IGFBP7,OOEP,MAGEA4
gene_set_query	676	GATA1	0.2242	ARCHS4 Coexpression,0.2242	SAGE1,PSTPIP2,DAPP1,PRAME,GTSF1,SSX1
gene_set_query	677	GCM1	0.2246	GTEx Coexpression,0.2246	IFITM2,CLEC7A,ARHGDIB,RAC2,JAK3,VAV1,TMEM71
gene_set_query	678	ZNF341	0.2248	ARCHS4 Coexpression,0.2248	ZYG11A,IFITM2,MX2,VAV1,HLA-E,TMEM154
gene_set_query	679	ZFP37	0.2251	Enrichr Queries,0.2251	DUSP5,TINAGL1,RSAD2,FHL2,EMP1,PIK3R1,PTGS2,NR3C1,IFIT3,NCALD,IFIT2,BMP4,CXCL10,SFRP1,GPNMB,ENPP2,KCTD12,PHLDA1,CD44,FBN1
gene_set_query	680	FEZF1	0.2254	ARCHS4 Coexpression,0.2254	SFRP1,ARMCX2,PRDM16,IGF2BP1,IGF2BP3,CD200
gene_set_query	681	ZFP82	0.2258	Enrichr Queries,0.2258	DUSP5,TINAGL1,FHL2,IFI44,EMP1,PTGS2,ETS1,IFIT3,ICAM1,BMP4,CXCL10,SERTAD4,CDK6,CCL2,XAF1,BCAT1,PHLDA1,CD200,CD44,FBN1
gene_set_query	682	ZSCAN10	0.226	ARCHS4 Coexpression,0.226	GJC1,SFRP1,CDH3,ARMCX2,IGF2BP1,IGF2BP3
gene_set_query	683	NKX61	0.2265	GTEx Coexpression,0.2265	BCHE,UBXN10,ITGA1,SLITRK3,TACC1,SEMA3E,HDAC9
gene_set_query	684	E2F3	0.2278	GTEx Coexpression,0.2278	SRGN,PSTPIP2,ARHGDIB,LY96,TRIM38,TLR4,VAV1
gene_set_query	685	HOXA3	0.2279	ARCHS4 Coexpression,0.2279	ANXA1,ANXA2,B3GNT3,SPATS2L,HLA-A,TM4SF1
gene_set_query	686	ZIM3	0.2284	GTEx Coexpression,0.2284	DNAH8,SPESP1,PRAME,COX7B2,GTSF1,DSCR8,MAGEA4
gene_set_query	687	FOXA3	0.2285	ARCHS4 Coexpression,0.2285	TDO2,BHMT2,B3GNT3,RGN,GBA3,KRT20
gene_set_query	688	KDM2B	0.229	GTEx Coexpression,0.229	HCP5,POF1B,DAPP1,TMPRSS13,TP63,KLK11,TMEM154
gene_set_query	689	DLX4	0.2296	GTEx Coexpression,0.2296	SDR16C5,POF1B,TNS4,GPRC5D,CLDN1,TMPRSS13,TP63
gene_set_query	690	ZNF615	0.2308	Enrichr Queries,0.2308	SLFN5,SAMD9L,ANXA1,SAMD9,MX1,IFI6,IFI44,PIK3R1,IFIT1,NR3C1,DDX60,SORL1,IFIT3,IFI44L,IFIT2,CXCL10,CDK6,CCL2,TACC1,PHLDA1
gene_set_query	691	ZNF713	0.2315	Enrichr Queries,0.2315	DUSP5,TINAGL1,PLEKHA2,MX1,IFI6,PIK3R1,AHR,IFIT1,PTGS2,DDX60,HDAC9,IFIT3,IFI44L,IFIT2,CXCL10,GPNMB,LAMP3,PHLDA1,MATN2,FBN1
gene_set_query	692	AKAP8	0.2316	ARCHS4 Coexpression,0.2316	INPP5D,IKZF1,TRIM38,SP140L,DKK3,MYO1G
gene_set_query	693	HOXA6	0.2321	GTEx Coexpression,0.2321	LGALS3,MMP14,OLFML3,HFE,MYOF,ELMO1,KRT20
gene_set_query	694	ARX	0.2322	ARCHS4 Coexpression,0.2322	GPX3,MPPED2,ENPP2,MSN,CD200,HS6ST3
gene_set_query	695	ZNF207	0.2323	ReMap ChIP-seq,0.2323	DENND2D,SRGN,DUSP5,GSTP1,SPESP1,IFI6,ISG15,SORL1,VAV1,PSMB8,ICAM1,IL27RA,CCND2,RGS1,RAB34,RAC2,DNASE1L3,SNX5
gene_set_query	696	EEA1	0.2327	GTEx Coexpression,0.2327	MMP14,ANXA2,TPM4,MYOF,NR3C1,XG,FBN1
gene_set_query	697	CDX1	0.2328	ARCHS4 Coexpression,0.2328	GALNT12,LGALS3,POF1B,B3GNT3,GBA3,KRT20
gene_set_query	698	DLX2	0.2334	GTEx Coexpression,0.2334	GREM1,LY6K,GABRA3,PNMA5,ZNF469,IGF2BP3,CSMD3
gene_set_query	699	ZNF329	0.2336	Enrichr Queries,0.2336	DUSP5,ANXA1,ANXA3,MX1,IFI6,FHL2,IFI44,IFIT1,HDAC9,SORL1,IFIT3,IFI44L,IFIT2,CXCL10,CCND2,CDK6,LAMP3,CHST15,KCTD12,PHLDA1
gene_set_query	700	LMX1A	0.234	ARCHS4 Coexpression,0.234	GJC1,PTPRO,HTR2C,PITX2,BMP7,NCALD
gene_set_query	701	ZNF239	0.2343	Enrichr Queries,0.2343	DUSP5,ANXA1,ANXA3,ITGA2,MX1,FHL2,CLDN1,IFIT3,PAPSS2,IFI44L,ASS1,IFIT2,CXCL10,CHST15,CCL2,KCTD12,BCAT1,PHLDA1,CD44,MATN2
gene_set_query	702	ZNF396	0.2346	GTEx Coexpression,0.2346	SRGN,IFITM2,ANXA3,LPCAT2,ARHGDIB,LY96,TLR4
gene_set_query	703	E2F1	0.2352	GTEx Coexpression,0.2352	APOBEC3C,APOBEC3G,SH3KBP1,HVCN1,GINS4,RAC2,MYO1G
gene_set_query	704	ZMAT1	0.2358	Enrichr Queries,0.2358	SLFN5,SAMD9L,TINAGL1,ANXA1,LRRK2,ITPR1,IFI44,PIK3R1,IFIT1,DDX60,HDAC9,SORL1,IFIT3,IFIT2,DOCK11,CXCL10,CCND2,KCTD12,PHLDA1,CD44
gene_set_query	705	EN1	0.2365	GTEx Coexpression,0.2365	ALG1L,PPP1R14C,POF1B,PAX3,SMTNL2,TP63,XG
gene_set_query	706	ISX	0.2365	ARCHS4 Coexpression,0.2365	LGALS3,POF1B,GDA,B3GNT3,GBA3,KRT20
gene_set_query	707	SATB2	0.2371	GTEx Coexpression,0.2371	GALNT12,LGALS3,GDA,B3GNT3,UGT2A3,KRT20,TRPM6
gene_set_query	708	PBX4	0.2371	ARCHS4 Coexpression,0.2371	HLA-H,DAPP1,FXYD5,JAK3,HLA-E,MYO1G
gene_set_query	709	ZNF804A	0.2372	Enrichr Queries,0.2372	DUSP5,BCHE,ANXA1,MCTP1,ANXA3,PLA2G4A,PTGS2,HDAC9,IFI44L,CXCL10,PTPRE,CCND2,CHST15,ENPP2,CCL2,KCTD12,CSMD3,BCAT1,PHLDA1,FBN1
gene_set_query	710	MAFK	0.2373	ENCODE ChIP-seq,0.2373	CD40,GSTP1,HFE,LY96,IFIT1,ETS1,ARSJ,KYNU,RAC2,SOSTDC1,PHLDA1,PLTP,GBP1,GBP3,SRGN,NQO1,TPM4,MX1,EMP1,MSN,VAV1,PSMB8,CXCL10,PLSCR1,UBXN10,RAB34,FAS,KCTD12,TLR4,DNASE1L3
gene_set_query	711	GABPA	0.2378	Literature ChIP-seq,0.2378	RTP4,NQO1,ANXA1,HFE,DAPP1,PLA2G4A,SEMA3E,RORB,AHR,PTGS2,ETS1,IFIT3,BMP6,OASL,BMP4,APOL6,MDFIC,ARHGDIB,IGFBP7,CSMD3,PHLDA1,CES1,MATN2
gene_set_query	712	ZNF763	0.2386	Enrichr Queries,0.2386	DUSP5,SLFN5,SAMD9L,SAMD9,IFI44,AHR,IFIT1,PTGS2,DDX60,ETS1,SORL1,IFIT3,IFI44L,ICAM1,CXCL10,EPSTI1,TACC1,KCTD12,XAF1,CD44
gene_set_query	713	DBX2	0.2389	ARCHS4 Coexpression,0.2389	BCHE,SLITRK3,CHI3L1,BMP7,SULT1C4
gene_set_query	714	TERF2	0.2391	ReMap ChIP-seq,0.2391	SRGN,TINAGL1,ANXA2,GSTP1,HVCN1,LRRK2,MACC1,TACSTD2,ITPR1,DAPP1,IFI35,TMEM154,APOL6,INPP5D,OAS3,ARHGDIB,RAC2,SFN
gene_set_query	715	SIX3	0.2396	ARCHS4 Coexpression,0.2396	NQO1,MAGEA12,COX7B2,CSAG1,MAGEA3
gene_set_query	716	ZSCAN16	0.2396	GTEx Coexpression,0.2396	PYCARD,IFITM2,ARHGDIB,RAC2,GIMAP2,JAK3,VAV1
gene_set_query	717	TCF23	0.2402	GTEx Coexpression,0.2402	GJC1,OLFML3,NRK,MITF,XIST,MATN2
gene_set_query	718	ZNF214	0.2408	ARCHS4 Coexpression,0.2408	CHST9,UBXN10,MPPED2,MSN,HDAC9
gene_set_query	719	KLF15	0.2408	GTEx Coexpression,0.2408	HCP5,BHMT2,FHL1,TACC1,PIK3R1,NKD1
gene_set_query	720	ZXDB	0.2414	ARCHS4 Coexpression,0.2414	LY6K,LAMA1,NR3C1,MAGEA6,TM4SF1
gene_set_query	721	NR2F6	0.2424	ReMap ChIP-seq,0.2424	IL4R,TPM4,CCL20,FBLN1,SORL1,TM4SF1,NKD1,ASS1,ICAM1,CDK6,OAF,RGN,IGF2BP1,S100P,DNASE1L3,SNX5,SLC16A5,TGM2
gene_set_query	722	ZIK1	0.2426	ARCHS4 Coexpression,0.2426	GJC1,CCND2,MYOF,IGF2BP1,BCAT1
gene_set_query	723	PRDM5	0.2436	Enrichr Queries,0.2436	TINAGL1,ANXA1,SEMA3D,MYOF,EMP1,PLA2G4A,MITF,PTGS2,ETS1,HDAC9,CXCL10,SFRP1,CCND2,CDK6,MDFIC,PPARG,BCAT1,MATN2,FBN1
gene_set_query	724	ZNF700	0.2439	ARCHS4 Coexpression,0.2439	DOCK11,PTPRE,IKZF1,XAF1,TMEM154
gene_set_query	725	ARID2	0.2446	GTEx Coexpression,0.2446	DNAH8,SPESP1,DDX43,GTSF1,OOEP,DSCR8
gene_set_query	726	SMAD9	0.245	Enrichr Queries,0.245	TINAGL1,ANXA1,EMP1,PIK3R1,PTGS2,NR3C1,PAPSS2,DKK3,BMP4,CXCL10,SFRP1,ENPP2,PPARG,KCTD12,PHLDA1,CD44,MATN2,TGM2,FBN1
gene_set_query	727	ZNF83	0.2457	Enrichr Queries,0.2457	DUSP5,IFITM1,ANXA1,ANXA2,SAMD9,MYOF,IFI6,IFI44,PIK3R1,IFIT1,NR3C1,ETS1,IFI44L,CXCL10,GPNMB,KCTD12,XAF1,BCAT1,CD44
gene_set_query	728	ZNF112	0.2463	ARCHS4 Coexpression,0.2463	ARHGDIB,RAC2,IKZF1,HLA-A,HLA-E
gene_set_query	729	EMX1	0.2464	GTEx Coexpression,0.2464	VSNL1,GDA,PTPRO,GABRA3,RORB,NCALD
gene_set_query	730	MSANTD3	0.2469	ARCHS4 Coexpression,0.2469	CPNE5,TPM4,PSTPIP2,DAPP1,BMP6
gene_set_query	731	ZNF208	0.247	GTEx Coexpression,0.247	GJC1,CKMT2,TINAGL1,CCND2,FHL2,TBX5
gene_set_query	732	RAX	0.2475	ARCHS4 Coexpression,0.2475	GJC1,SFRP1,ARMCX2,IGF2BP1,RORB
gene_set_query	733	THAP11	0.2482	ARCHS4 Coexpression,0.2482	RAC2,DAPP1,HLA-A,BMP6,HLA-E
gene_set_query	734	VSX2	0.2483	GTEx Coexpression,0.2483	MCTP1,EPB41L3,ELMO1,HTR2C,CSMD3,AGPAT4
gene_set_query	735	ZNF32	0.2486	Enrichr Queries,0.2486	IFITM3,ANXA1,ANXA2,IFI6,FHL2,EMP1,PIK3R1,IFIT3,ASS1,LGALS3,CXCL10,CCND2,GPNMB,S100A6,CCL2,IGFBP7,BCAT1,PHLDA1,CD44
gene_set_query	736	ZNF627	0.2488	ARCHS4 Coexpression,0.2488	PTPRO,MPPED2,MSN,MKRN3,CD200
gene_set_query	737	ESRRA	0.2492	ReMap ChIP-seq,0.2492	TINAGL1,MACC1,MYOF,TACSTD2,EMP1,BMP7,SORL1,THSD4,ASS1,UBXN10,KRT15,RAB34,B3GNT3,S100A6,S100P,TNS4,SLC16A5,TGM2
gene_set_query	738	SHOX2	0.2495	GTEx Coexpression,0.2495	MMP14,TPM4,MYOF,AHR,FBLN2,FBN1
gene_set_query	739	ZNF35	0.25	ARCHS4 Coexpression,0.25	ARHGDIB,RAC2,HLA-A,BCAT1,HLA-E
gene_set_query	740	TIGD4	0.25	Enrichr Queries,0.25	NQO1,SAMD9L,TINAGL1,MCTP1,RSAD2,IFI44,EMP1,PTGS2,HDAC9,SORL1,IFIT3,NCALD,TMEM154,CXCL10,GPNMB,ENPP2,TLR4,SULT1C4,TGM2
gene_set_query	741	FOXG1	0.2506	ARCHS4 Coexpression,0.2506	CCND2,PRDM16,MPPED2,HDAC9,AGPAT4
gene_set_query	742	TBX15	0.2507	Enrichr Queries,0.2507	TINAGL1,ANXA1,GPX3,FHL2,EMP1,PTGS2,ETS1,FBLN2,GREM1,CXCL10,SFRP1,OLFML3,PRDM16,ENPP2,CCL2,PPARG,IGFBP7,PITX2,FBN1
gene_set_query	743	DBP	0.2514	Enrichr Queries,0.2514	IFITM3,TINAGL1,GPX3,ITPR1,EMP1,PIK3R1,SORL1,IFIT3,ICAM1,LGALS3,CXCL10,CCND2,GPNMB,ENPP2,S100A6,PHLDA1,S100A9,PLTP,TGM2
gene_set_query	744	ISL1	0.2526	GTEx Coexpression,0.2526	BMP4,SFRP1,COL2A1,FBLN1,SEMA3E,MATN2
gene_set_query	745	HOXD9	0.2539	GTEx Coexpression,0.2539	GJC1,SFRP1,OLFML3,RAB34,MITF,MATN2
gene_set_query	746	E2F4	0.2542	ENCODE ChIP-seq,0.2542	IFITM3,IFITM1,CD40,CSTA,GALNT14,TACSTD2,PLAT,IFIT1,PTGS2,TMEM71,LGALS3,CCND2,PHLDA1,GBP1,TGM2,DUSP5,HLA-H,PLEKHA2,GINS4,MSN,ISG15,PARP14,HLA-E,CXCL10,PTPRE,IFI27,VSNL1,ACER3,CLIP4,SLC9A9,B3GNT3,FAS,CHI3L1
gene_set_query	747	ZBTB37	0.2543	ARCHS4 Coexpression,0.2543	APOL6,LRRK2,XAF1,SORL1,TMEM154
gene_set_query	748	MECOM	0.2545	GTEx Coexpression,0.2545	GALNT12,SULT1C2,NQO1,COL2A1,B3GNT3,S100P
gene_set_query	749	ZNF318	0.2551	GTEx Coexpression,0.2551	CD40,ZYG11A,OAS2,HVCN1,ZNF257,IFI44L
gene_set_query	750	GSX1	0.2555	ARCHS4 Coexpression,0.2555	BCHE,HFE,MKRN3,TBX5,HDAC9
gene_set_query	751	ATF2	0.2559	ReMap ChIP-seq,0.2559	DENND2D,SRGN,GSTP1,HFE,MACC1,IFI35,PYCARD,CCND2,RGS1,RAB34,IGF2BP1,HLA-DRA,IGF2BP3,BCAT1,JAK3,PHLDA1,SNX5,MYO1G
gene_set_query	752	ZNF23	0.2564	Enrichr Queries,0.2564	DUSP5,TINAGL1,RSAD2,ITPR1,FHL2,PIK3R1,PTGS2,NR3C1,SORL1,IFIT3,IFIT2,LGALS3,CXCL10,CCND2,ENPP2,PHLDA1,CD44,TGM2,GBP3
gene_set_query	753	FIGLA	0.2568	ARCHS4 Coexpression,0.2568	CCNB3,NLRP2,GTSF1,OOEP,BMP6
gene_set_query	754	ZNF236	0.257	GTEx Coexpression,0.257	CCNB3,MAGEA1,PRAME,MAGEA6,MAGEA3,MAGEA4
gene_set_query	755	GTF2B	0.2574	ARCHS4 Coexpression,0.2574	CLEC2B,RSAD2,CCL20,PSTPIP2,IFI35
gene_set_query	756	GSX2	0.258	ARCHS4 Coexpression,0.258	BCHE,CCND2,PAX3,MKRN3,BMP7
gene_set_query	757	ZFHX3	0.2582	GTEx Coexpression,0.2582	TINAGL1,PRDM16,FHL1,PLS3,IGFBP7,ATP10A
gene_set_query	758	ZNF346	0.2586	ARCHS4 Coexpression,0.2586	LGALS3,MMP14,MYOF,MPPED2,FXYD5
gene_set_query	759	HOXA2	0.2592	ARCHS4 Coexpression,0.2592	FERMT1,GABRA3,IGF2BP1,PAX3,IL13RA2
gene_set_query	760	TBX19	0.2593	Enrichr Queries,0.2593	DUSP5,TINAGL1,ANXA1,IFI44,EMP1,PLA2G4A,MITF,IFIT1,PTGS2,ETS1,SORL1,IFIT3,IFIT2,CXCL10,OAS1,RGS1,KYNU,CCL2,CD44
gene_set_query	761	TCF24	0.26	Enrichr Queries,0.26	TINAGL1,GPX3,RORB,IFIT1,DDX60,CLDN1,PAPSS2,OASL,LGALS3,CLDN10,CXCL10,SFRP1,GPNMB,RASGEF1A,EPSTI1,ENPP2,CCL2,PITX2,CTSC
gene_set_query	762	FOXO4	0.2611	ARCHS4 Coexpression,0.2611	LRRK2,CHST15,HLA-A,TLR4,HLA-E
gene_set_query	763	ZNF454	0.2614	GTEx Coexpression,0.2614	DENND2D,HCP5,ARMCX1,ARMCX2,ARSJ,DAPP1
gene_set_query	764	ZNF541	0.2614	Enrichr Queries,0.2614	DUSP5,TINAGL1,CPNE5,DNAH8,PLA2G4A,RORB,PTGS2,FBLN2,BMP7,SORL1,IFIT3,CXCL10,SFRP1,RGS1,PRDM16,CCL2,ZNF469,S100A9,CES1
gene_set_query	765	THAP12	0.2617	ARCHS4 Coexpression,0.2617	CDK6,MDFIC,MSN,IKZF1,ETS1
gene_set_query	766	THAP2	0.2621	Enrichr Queries,0.2621	DUSP5,TINAGL1,RSAD2,IFI44,EMP1,PIK3R1,AHR,IFIT1,PTGS2,NR3C1,DDX60,IFIT3,IFIT2,ICAM1,CXCL10,CCND2,CDK6,PHLDA1,CD44
gene_set_query	767	KLF12	0.2623	ARCHS4 Coexpression,0.2623	DOCK11,SLFN5,IKZF1,PIK3R1,ETS1
gene_set_query	768	ZNF284	0.2628	Enrichr Queries,0.2628	DUSP5,SLFN5,SAMD9L,SAMD9,IFI44,ISG15,PIK3R1,AHR,IFIT1,IFIT3,IFI44L,IFIT2,CXCL10,GPNMB,LAMP3,ENPP2,CD44,MATN2,FBN1
gene_set_query	769	C11ORF95	0.2638	GTEx Coexpression,0.2638	DENND2D,ARMCX1,ARMCX2,RAB34,DAPP1,TMEM154
gene_set_query	770	TGIF2LY	0.2641	ARCHS4 Coexpression,0.2641	PLSCR1,APOL6,DNAH8,PIK3R1,IFIT1
gene_set_query	771	EMX2	0.2642	Enrichr Queries,0.2642	TINAGL1,RORB,PTGS2,FBLN2,BMP7,NCALD,GREM1,CLDN10,CXCL10,SFRP1,COL2A1,CCND2,GPNMB,PRDM16,ENPP2,CCL2,PPARG,PITX2,MATN2
gene_set_query	772	ATOH1	0.2645	GTEx Coexpression,0.2645	GALNT12,LGALS3,B3GNT3,UGT2A3,KRT20,TRPM6
gene_set_query	773	ZNF843	0.265	Enrichr Queries,0.265	ANKDD1A,SP100,TINAGL1,RSAD2,HFE,IFIT1,IFIT3,IFI44L,IFIT2,ICAM1,OASL,BST2,CXCL10,APOL6,IFI16,PRDM16,CCL2,ZNF469,CES1
gene_set_query	774	PRDM6	0.2651	GTEx Coexpression,0.2651	TINAGL1,RAB34,PRDM16,PLS3,IGFBP7,ATP10A
gene_set_query	775	ZNF182	0.2654	ARCHS4 Coexpression,0.2654	CLEC7A,LRRK2,IKZF1,SORL1,TMEM154
gene_set_query	776	TAL2	0.2657	Enrichr Queries,0.2657	TINAGL1,RSAD2,LAMA1,PAX3,PTGS2,IFIT2,ICAM1,LGALS3,CXCL10,SFRP1,COL2A1,PRDM16,CCL2,PPARG,PITX2,PHLDA1,CD44,GBP4,FBN1
gene_set_query	777	ZNF90	0.267	GTEx Coexpression,0.267	CD40,ZYG11A,OAS2,GINS4,ZNF257,SNX5
gene_set_query	778	ZGPAT	0.2672	ARCHS4 Coexpression,0.2672	IL4R,RAC2,HLA-A,HLA-E,MYO1G
gene_set_query	779	ARNT	0.2678	ARCHS4 Coexpression,0.2678	DOCK11,APOL6,INPP5D,MSN,KCTD12
gene_set_query	780	XPA	0.2682	GTEx Coexpression,0.2682	RAB34,PRDM16,MPPED2,FHL1,ITGA1,ITPR1
gene_set_query	781	ZIC5	0.2684	ARCHS4 Coexpression,0.2684	GJC1,SFRP1,IGF2BP1,IGF2BP3,BCAT1
gene_set_query	782	ZNF687	0.2694	GTEx Coexpression,0.2694	PYCARD,IFITM2,ARHGDIB,RAC2,JAK3,VAV1
gene_set_query	783	ZSCAN18	0.2699	Enrichr Queries,0.2699	IFITM3,DUSP5,TINAGL1,GPX3,IFI44,EMP1,ISG15,NCALD,DKK3,CXCL10,SFRP1,CCND2,CHST15,ENPP2,CCL2,IGFBP7,PHLDA1,CD44,MATN2
gene_set_query	784	DMRT2	0.2703	ARCHS4 Coexpression,0.2703	CKMT2,FHL1,SMTNL2,IL13RA2,PLTP
gene_set_query	785	PHOX2B	0.2707	GTEx Coexpression,0.2707	GJC1,BCHE,CCND2,UBXN10,ITGA1,PLA2G4A
gene_set_query	786	RFX4	0.2709	ARCHS4 Coexpression,0.2709	BCHE,CCND2,PAX3,MKRN3,SULT1C4
gene_set_query	787	ZNF449	0.2713	GTEx Coexpression,0.2713	ARMCX1,TINAGL1,HFE,HEXA,ITGA1,TACC1
gene_set_query	788	TBX1	0.2714	Enrichr Queries,0.2714	DUSP5,TINAGL1,FBLN1,PTGS2,ETS1,BMP6,ICAM1,BMP4,CXCL10,SFRP1,COL2A1,CCND2,PRDM16,PPARG,PITX2,CD44,TGM2,FBN1
gene_set_query	789	ZFPM2	0.2721	Enrichr Queries,0.2721	TINAGL1,FHL2,MITF,FBLN1,PIK3R1,PTGS2,ETS1,HDAC9,CXCL10,SFRP1,CCND2,OLFML3,ENPP2,CCL2,IGFBP7,KCTD12,MATN2,FBN1
gene_set_query	790	ZIC2	0.2721	ARCHS4 Coexpression,0.2721	GJC1,SFRP1,IGF2BP1,IGF2BP3,BCAT1
gene_set_query	791	HOXB13	0.2727	ReMap ChIP-seq,0.2727	DUSP5,CSTA,PPP1R14C,ANXA2,DNAH8,GSTP1,ITPR1,IFI35,IFI44L,COL2A1,KYNU,LPCAT2,SLITRK3,CNGB3,TRIM38,GTSF1,SNX5
gene_set_query	792	LIN28B	0.2727	ARCHS4 Coexpression,0.2727	GJC1,SFRP1,IGF2BP1,IGF2BP3,BCAT1
gene_set_query	793	PLAG1	0.2728	Enrichr Queries,0.2728	DUSP5,TINAGL1,MITF,PIK3R1,AHR,IFIT1,PTGS2,NR3C1,ETS1,HDAC9,CXCL10,SFRP1,CCND2,CDK6,PPARG,IGF2BP3,CD44,FBN1
gene_set_query	794	ZNF581	0.2738	GTEx Coexpression,0.2738	PYCARD,APOBEC3G,RAC2,FXYD5,VAV1,MYO1G
gene_set_query	795	ZKSCAN4	0.274	ARCHS4 Coexpression,0.274	BST2,RAC2,SPATS2L,UBE2L6,IKZF1
gene_set_query	796	PDX1	0.2746	ARCHS4 Coexpression,0.2746	CHST9,ENPP2,ELMO1,CLDN1,PAPSS2
gene_set_query	797	PAX3	0.2752	ARCHS4 Coexpression,0.2752	BCHE,TYRP1,MKRN3,MITF,FZD10
gene_set_query	798	DACH1	0.2756	Enrichr Queries,0.2756	TINAGL1,ANXA3,ITPR1,PLA2G4A,ETS1,HDAC9,SORL1,NCALD,BMP4,CXCL10,SFRP1,CCND2,ENPP2,ELMO1,CCL2,KCTD12,CD44,FBN1
gene_set_query	799	ZNF813	0.2757	GTEx Coexpression,0.2757	APOBEC3C,CDK6,IFI16,GINS4,FAS,IGF2BP3
gene_set_query	800	HES3	0.2758	ARCHS4 Coexpression,0.2758	GJC1,SFRP1,ARMCX2,IGF2BP1,IGF2BP3
gene_set_query	801	DNTTIP1	0.2763	GTEx Coexpression,0.2763	PYCARD,IFITM2,ARHGDIB,RAC2,VAV1,TMEM71
gene_set_query	802	KLF11	0.2764	ARCHS4 Coexpression,0.2764	CCNB3,ANXA2P1,DDX43,OOEP,BMP6
gene_set_query	803	TERF1	0.277	ARCHS4 Coexpression,0.277	GJC1,SFRP1,IGF2BP1,IGF2BP3,BCAT1
gene_set_query	804	ZNF91	0.2778	Enrichr Queries,0.2778	IFITM3,ANXA1,ANXA2,ANXA3,IFI6,PIK3R1,AHR,IFIT1,NR3C1,SORL1,IFIT3,CXCL10,CCND2,GPNMB,CHST15,KCTD12,PHLDA1,CD44
gene_set_query	805	ZNF205	0.2782	GTEx Coexpression,0.2782	CLEC7A,INPP5D,HVCN1,RAC2,IKZF1,VAV1
gene_set_query	806	FOXD3	0.2783	ARCHS4 Coexpression,0.2783	GJC1,SFRP1,IGF2BP1,IGF2BP3,MAGEA2B
gene_set_query	807	NFIX	0.2785	Enrichr Queries,0.2785	IFITM3,TINAGL1,ANXA1,ANXA2,MYOF,EMP1,PIK3R1,NR3C1,ETS1,SORL1,DKK3,LGALS3,CCND2,IGFBP7,PHLDA1,CD44,TGM2,FBN1
gene_set_query	808	FOXP2	0.2788	GTEx Coexpression,0.2788	GJC1,BCHE,UBXN10,ITGA1,MITF,SEMA3E
gene_set_query	809	NME2	0.2795	ReMap ChIP-seq,0.2795	ANKDD1A,SPESP1,ITGA1,PAX3,DAPP1,AHR,NR3C1,TBX5,ASCL2,PLSCR1,SERTAD4,LAMP3,ARHGDIB,CCL2,SFN,TNS4,CD200
gene_set_query	810	MAFA	0.2795	ARCHS4 Coexpression,0.2795	CKMT2,FHL1,SMTNL2,ANO5,PAPSS2
gene_set_query	811	MYBL2	0.28	GTEx Coexpression,0.28	APOBEC3C,APOBEC3G,OAS2,HVCN1,GINS4,MYO1G
gene_set_query	812	CREB3	0.2806	Enrichr Queries,0.2806	IFITM3,DUSP5,TINAGL1,ANXA1,ANXA2,TPM4,ANXA3,FHL2,EMP1,ISG15,ETS1,ICAM1,LGALS3,CXCL10,S100A6,PHLDA1,CD44,TGM2
gene_set_query	813	KLF17	0.2813	Enrichr Queries,0.2813	ZYG11A,TINAGL1,RSAD2,IFI44,PLA2G4A,PLAT,MITF,PTGS2,ETS1,PAPSS2,BMP4,CXCL10,SFRP1,CCL2,PPARG,GBP4,TGM2,GBP3
gene_set_query	814	ZNF608	0.2819	ARCHS4 Coexpression,0.2819	RAC2,IGF2BP1,FXYD5,HLA-E,AGPAT4
gene_set_query	815	ZNF41	0.2832	ARCHS4 Coexpression,0.2832	CKMT2,PLEKHA2,FHL1,MSN,SMTNL2
gene_set_query	816	NR1D2	0.2835	Enrichr Queries,0.2835	IFITM3,DUSP5,TINAGL1,ANXA1,ANXA2,ITPR1,EMP1,PIK3R1,NR3C1,ETS1,SORL1,IFIT3,LGALS3,CXCL10,CCND2,ENPP2,PHLDA1,CD44
gene_set_query	817	ZSCAN31	0.2838	GTEx Coexpression,0.2838	IFI16,SH3KBP1,UBXN10,FXYD5,CTSC,PSMB8
gene_set_query	818	NR2E3	0.2842	Enrichr Queries,0.2842	TINAGL1,PAX3,MITF,PIK3R1,RORB,NR3C1,TBX5,ETS1,FBLN2,BMP7,THSD4,CXCL10,PRDM16,PPARG,PITX2,PHLDA1,CD44,SULT1C4
gene_set_query	819	HOXA7	0.2849	Enrichr Queries,0.2849	TINAGL1,ANXA1,ANXA3,GPX3,EMP1,PTGS2,ETS1,BMP4,CXCL10,SFRP1,COL2A1,CCND2,PRDM16,ENPP2,CCL2,PPARG,PITX2,FBN1
gene_set_query	820	ZBTB22	0.2856	GTEx Coexpression,0.2856	PYCARD,POF1B,ASCL2,TMPRSS13,CD44,TMEM154
gene_set_query	821	SP7	0.2863	Enrichr Queries,0.2863	DUSP5,TINAGL1,FHL2,SEMA3E,FBLN2,HDAC9,NKD1,THSD4,BMP4,CXCL10,COL2A1,SERTAD4,CCND2,GPNMB,OLFML3,ENPP2,PHLDA1,MATN2
gene_set_query	822	RFX6	0.2887	ARCHS4 Coexpression,0.2887	CHST9,GDA,GPX3,ENPP2,PAPSS2
gene_set_query	823	DLX1	0.2892	Enrichr Queries,0.2892	DUSP5,TINAGL1,FHL2,EMP1,PTGS2,BMP7,NCALD,BMP4,GREM1,CXCL10,SFRP1,COL2A1,SERTAD4,CCND2,GPNMB,ENPP2,PITX2,PHLDA1
gene_set_query	824	DNMT1	0.2899	ARCHS4 Coexpression,0.2899	CCNB3,NLRP2,IGF2BP3,OOEP,BMP6
gene_set_query	825	PAX4	0.29	GTEx Coexpression,0.29	GALNT12,LGALS3,B3GNT3,UGT2A3,KRT20,TRPM6
gene_set_query	826	POU3F1	0.2906	GTEx Coexpression,0.2906	PPP1R14C,POF1B,TYRP1,CLDN1,TMPRSS13,TP63
gene_set_query	827	ZNF652	0.2918	ARCHS4 Coexpression,0.2918	LRRK2,TRIM38,TRPM6,SORL1,TMEM154
gene_set_query	828	TERB1	0.2918	GTEx Coexpression,0.2918	DNAH8,SPESP1,DDX43,COX7B2,GTSF1,DSCR8
gene_set_query	829	HNF4A	0.2924	ARCHS4 Coexpression,0.2924	TDO2,BHMT2,B3GNT3,GBA3,KRT20
gene_set_query	830	TBX20	0.2925	GTEx Coexpression,0.2925	CKMT2,CPNE5,FHL2,TBX5,FBLN2,DKK3
gene_set_query	831	MLX	0.293	ARCHS4 Coexpression,0.293	RAC2,IFI35,HLA-A,PSMB8,HLA-E
gene_set_query	832	ZNF699	0.2936	ARCHS4 Coexpression,0.2936	SLFN5,ZYG11A,SP100,NR3C1,ZNF257
gene_set_query	833	FOXJ1	0.2942	Enrichr Queries,0.2942	IFITM3,DUSP5,TINAGL1,ANXA1,EMP1,FBLN2,BMP7,ICAM1,LGALS3,CXCL10,SFRP1,MMP14,ENPP2,S100A6,CCL2,PLTP,CD44,TGM2
gene_set_query	834	HOXD12	0.295	GTEx Coexpression,0.295	GJC1,UBXN10,PLA2G4A,FBLN1,SEMA3E,MATN2
gene_set_query	835	ZNF251	0.2956	Enrichr Queries,0.2956	IFITM3,DUSP5,ITPR1,FHL2,EMP1,PIK3R1,NR3C1,IFIT3,ASS1,IFIT2,ICAM1,BMP4,CCND2,CHST15,S100A6,PHLDA1,MATN2,FBN1
gene_set_query	836	FOXA2	0.2963	ReMap ChIP-seq,0.2963	DUSP5,ANXA2,SPESP1,IFI35,CLDN1,SORL1,TM4SF1,KRT15,RAB34,KYNU,IGF2BP1,SPATS2L,IGF2BP3,S100P,PHLDA1,SNX5,SLC16A5
gene_set_query	837	ZNF354C	0.2963	Enrichr Queries,0.2963	TINAGL1,ANXA1,ITGA2,PLA2G4A,PIK3R1,RORB,PTGS2,NR3C1,ETS1,HDAC9,SORL1,NCALD,CXCL10,SFRP1,CCND2,PPARG,IGFBP7,FBN1
gene_set_query	838	SP9	0.2967	ARCHS4 Coexpression,0.2967	GALNT14,MPPED2,SLITRK3,PLS3,CD200
gene_set_query	839	ZNF571	0.297	Enrichr Queries,0.297	DUSP5,SLFN5,SAMD9L,ANXA1,SAMD9,MX1,IFI6,IFI44,ISG15,PIK3R1,IFIT1,DDX60,IFIT3,IFI44L,IFIT2,CXCL10,EPSTI1,PHLDA1
gene_set_query	840	ZNF18	0.2974	GTEx Coexpression,0.2974	PYCARD,IFITM2,ARHGDIB,RAC2,VAV1,TMEM71
gene_set_query	841	ZNF135	0.2977	Enrichr Queries,0.2977	TINAGL1,MX1,FBLN1,ATP10A,ETS1,HDAC9,SORL1,IFI44L,NCALD,CXCL10,SFRP1,CCND2,EPB41L3,PRDM16,ELMO1,CD200,CD44,MATN2
gene_set_query	842	ZNF611	0.2981	GTEx Coexpression,0.2981	SRGN,MX2,ARHGDIB,RAC2,TRIM38,TLR4
gene_set_query	843	SETBP1	0.2984	Enrichr Queries,0.2984	DUSP5,MYOF,ITPR1,EMP1,PIK3R1,PTGS2,NR3C1,ETS1,HDAC9,SORL1,NCALD,CXCL10,CCND2,CHST15,ENPP2,KCTD12,PHLDA1,FBN1
gene_set_query	844	ARID3C	0.2985	ARCHS4 Coexpression,0.2985	TDO2,OAF,BHMT2,MPPED2,RGN
gene_set_query	845	RXRG	0.2991	ARCHS4 Coexpression,0.2991	CKMT2,FHL1,MITF,RORB,SMTNL2
gene_set_query	846	L3MBTL4	0.2993	GTEx Coexpression,0.2993	PPP1R14C,POF1B,TNS4,CLDN1,TMPRSS13,TP63
gene_set_query	847	ZNF596	0.2999	Enrichr Queries,0.2999	SLFN5,ANXA1,SAMD9,IFI6,PIK3R1,AHR,IFIT1,HDAC9,SORL1,IFIT3,IFI44L,NCALD,IFIT2,CXCL10,GPNMB,XAF1,CD44,MATN2
gene_set_query	848	TFAP2D	0.3004	ARCHS4 Coexpression,0.3004	CCNB3,HTR2C,PITX2,OOEP,BMP6
gene_set_query	849	ZNF572	0.3006	Enrichr Queries,0.3006	CHST9,SLFN5,ANXA1,FHL2,EMP1,IFIT1,DDX60,CLDN1,IFIT3,IFIT2,CXCL10,LPAR6,ENPP2,CPVL,ZNF257,PHLDA1,CD44,MATN2
gene_set_query	850	HOXD1	0.301	ARCHS4 Coexpression,0.301	CCNB3,FAM133A,GSTP1,SOSTDC1,DDX43
gene_set_query	851	DUXA	0.3012	GTEx Coexpression,0.3012	TINAGL1,PRDM16,PLS3,IGFBP7,ATP10A
gene_set_query	852	CPXCR1	0.3013	Enrichr Queries,0.3013	BCHE,TINAGL1,SEMA3D,TYRP1,EMP1,HTR2C,PLA2G4A,SEMA3E,HDAC9,ANO3,CXCL10,POF1B,TDO2,SLITRK3,CNGB3,CCL2,CSMD3,IL13RA2
gene_set_query	853	HOXC10	0.3022	ARCHS4 Coexpression,0.3022	CKMT2,LY6K,FHL1,SMTNL2,ASS1
gene_set_query	854	EVX1	0.3024	GTEx Coexpression,0.3024	LPAR6,RGN,PLAT,FBLN1,MATN2
gene_set_query	855	ZNF69	0.3027	Enrichr Queries,0.3027	IFITM3,IFITM2,ANXA1,ERAP2,HFE,MYOF,IL18,IFI6,DAPP1,SEMA3E,AHR,SORL1,NCALD,CXCL10,CCND2,IGFBP7,PHLDA1
gene_set_query	856	JRKL	0.303	GTEx Coexpression,0.303	LAMA1,ARSJ,IGF2BP1,IGF2BP3,FBN1
gene_set_query	857	ZNF682	0.3034	Enrichr Queries,0.3034	ERAP2,ANXA3,MX1,IL18,IFI6,IFI44,DAPP1,SEMA3E,AHR,IFIT1,IFIT3,IFI44L,CXCL10,CCND2,OAS1,XAF1,ZNF257
gene_set_query	858	DBX1	0.3034	ARCHS4 Coexpression,0.3034	BCHE,CCND2,IGF2BP1,PAX3,MKRN3
gene_set_query	859	ZNF783	0.3047	ARCHS4 Coexpression,0.3047	SLFN5,IL4R,IKZF1,ETS1,MYO1G
gene_set_query	860	ZNF662	0.3048	Enrichr Queries,0.3048	DUSP5,TINAGL1,ANXA1,GPX3,PIK3R1,PTGS2,FBLN2,IFIT3,IFI44L,NCALD,CXCL10,SFRP1,CCND2,SLC9A9,PPARG,KCTD12,MATN2
gene_set_query	861	HOXC5	0.3055	GTEx Coexpression,0.3055	MMP14,OLFML3,RAB34,MYOF,FBN1
gene_set_query	862	ZNF474	0.3063	Enrichr Queries,0.3063	TINAGL1,ITGA2,FHL2,IFI44,PTGS2,HDAC9,IFIT3,IFI44L,THSD4,CXCL10,GPNMB,ENPP2,CHI3L1,CCL2,PHLDA1,MATN2,FBN1
gene_set_query	863	CEBPG	0.3064	ReMap ChIP-seq,0.3064	SRGN,ANXA1,MACC1,ITPR1,FHL2,MITF,IFI35,BMP7,ASS1,APOL6,UBXN10,SPATS2L,TRIM38,BCAT1,CTSC,TGM2
gene_set_query	864	ZNF761	0.307	Enrichr Queries,0.307	IFITM3,NQO1,SLFN5,TINAGL1,ANXA1,ANXA3,PLEKHA2,HFE,PLA2G4A,SORL1,IFIT3,IFIT2,LGALS3,CXCL10,CDK6,S100A6,PHLDA1
gene_set_query	865	MLXIPL	0.3077	ARCHS4 Coexpression,0.3077	TDO2,OAF,BHMT2,RGN,CES1
gene_set_query	866	FEV	0.3084	ARCHS4 Coexpression,0.3084	CHST9,GPX3,ENPP2,PAPSS2,HS6ST3
gene_set_query	867	ZNF485	0.3084	Enrichr Queries,0.3084	DUSP5,MX1,FHL2,IFI44,EMP1,IFIT1,PTGS2,CLDN1,ETS1,HDAC9,IFIT3,FERMT1,CXCL10,CDK6,OAS1,OAS2,PHLDA1
gene_set_query	868	PAX7	0.309	ARCHS4 Coexpression,0.309	PRDM16,IGF2BP1,PAX3,SMTNL2,AGPAT4
gene_set_query	869	BHLHA9	0.3093	GTEx Coexpression,0.3093	KRT222,VSNL1,GABRA3,RORB,NCALD
gene_set_query	870	MYCN	0.3098	Enrichr Queries,0.3098	DUSP5,TINAGL1,EMP1,MITF,PIK3R1,ETS1,BMP7,CXCL10,SFRP1,CCND2,CDK6,MPPED2,ELMO1,IGF2BP1,BCAT1,PHLDA1,CD44
gene_set_query	871	ESRRG	0.3099	GTEx Coexpression,0.3099	SULT1C2,NQO1,COL2A1,B3GNT3,S100P
gene_set_query	872	RORC	0.3102	ARCHS4 Coexpression,0.3102	CKMT2,TDO2,BHMT2,FHL1,SMTNL2
gene_set_query	873	SREBF1	0.3105	GTEx Coexpression,0.3105	BST2,FERMT1,OAF,RGN,PAPSS2
gene_set_query	874	ZNF391	0.3113	Enrichr Queries,0.3113	SLFN5,SAMD9,HFE,IFI44,PIK3R1,PTGS2,DDX60,HDAC9,SORL1,NCALD,BMP4,CXCL10,CCND2,CDK6,GPNMB,ENPP2,IGF2BP3
gene_set_query	875	ZNF836	0.3118	GTEx Coexpression,0.3118	BST2,SP100,NRK,FAS,TRIM38
gene_set_query	876	FOXB2	0.3124	GTEx Coexpression,0.3124	PTPRO,GABRA3,PNMA5,CSMD3,CD200
gene_set_query	877	REST	0.3127	ARCHS4 Coexpression,0.3127	CDK6,NLRP2,BCAT1,COX7B2
gene_set_query	878	HOXB8	0.3127	Enrichr Queries,0.3127	TINAGL1,EMP1,PTGS2,ETS1,BMP4,LGALS3,CXCL10,SFRP1,CCND2,S100A6,CCL2,PPARG,PITX2,PHLDA1,SKAP1,CD44,TGM2
gene_set_query	879	HOXD3	0.313	GTEx Coexpression,0.313	BST2,MMP14,OLFML3,NRK,RAB34
gene_set_query	880	FOXJ2	0.3131	ReMap ChIP-seq,0.3131	KRT222,ANXA1,CPNE5,MACC1,IL18,NCALD,IL27RA,AGPAT4,BST2,APOL6,UBXN10,KRT15,MKRN3,S100A9,MAGEA4,MATN2
gene_set_query	881	NR2E1	0.3133	ARCHS4 Coexpression,0.3133	BCHE,PRDM16,MPPED2,OOEP
gene_set_query	882	SRF	0.3136	ENCODE ChIP-seq,0.3136	TPM4,ANXA3,GSTP1,ISG15,TNS4,SP140L,AGPAT4
gene_set_query	883	ZFP91	0.3136	GTEx Coexpression,0.3136	CRISP2,DNAH8,SPESP1,GTSF1,DSCR8
gene_set_query	884	AHCTF1	0.3149	GTEx Coexpression,0.3149	DNAH8,SPESP1,DDX43,GTSF1,DSCR8
gene_set_query	885	ZNF737	0.3155	GTEx Coexpression,0.3155	ARMCX2,MPPED2,WDR72,ZNF257,SNX5
gene_set_query	886	ZNF846	0.3155	Enrichr Queries,0.3155	DUSP5,SLFN5,SAMD9L,SAMD9,LRRK2,PIK3R1,ETS1,SORL1,IFIT3,IFIT2,ICAM1,LGALS3,CXCL10,GPNMB,PHLDA1,CD44,MATN2
gene_set_query	887	ZNF727	0.3163	ARCHS4 Coexpression,0.3163	MPPED2,PNMA5,OOEP,ANO3
gene_set_query	888	ZNF649	0.317	ARCHS4 Coexpression,0.317	GJC1,IGF2BP1,IGF2BP3,BCAT1
gene_set_query	889	ZNF362	0.3174	GTEx Coexpression,0.3174	PRDM16,ITPR1,PLS3,IGFBP7,ATP10A
gene_set_query	890	GFI1B	0.3176	ARCHS4 Coexpression,0.3176	CPNE5,PSTPIP2,DAPP1,BMP6
gene_set_query	891	ZNF564	0.318	GTEx Coexpression,0.318	PYCARD,IFITM2,ARHGDIB,GIMAP2,LY96
gene_set_query	892	ZNF587B	0.3182	ARCHS4 Coexpression,0.3182	GJC1,TTC22,IGF2BP3,BCAT1
gene_set_query	893	ZNF416	0.3186	GTEx Coexpression,0.3186	POF1B,TMPRSS13,TP63,XG,TMEM154
gene_set_query	894	ZNF780A	0.3192	GTEx Coexpression,0.3192	ARHGDIB,GIMAP2,LY96,SORL1,VAV1
gene_set_query	895	ZSCAN9	0.32	ARCHS4 Coexpression,0.32	ARMCX1,PTPRO,ANXA2P1,CD200
gene_set_query	896	ZNF546	0.3205	GTEx Coexpression,0.3205	DNAH8,SPESP1,COX7B2,GTSF1,DSCR8
gene_set_query	897	ZNF518B	0.3205	Enrichr Queries,0.3205	BCHE,SLFN5,ANXA1,LAMA1,PIK3R1,NR3C1,ETS1,HDAC9,SORL1,CCND2,CDK6,CHST15,S100A6,IGFBP7,KCTD12,PHLDA1,CD44
gene_set_query	898	ZNF678	0.3213	ARCHS4 Coexpression,0.3213	GJC1,IGF2BP1,IGF2BP3,BCAT1
gene_set_query	899	ZBTB10	0.3217	GTEx Coexpression,0.3217	ARMCX1,TINAGL1,DAPP1,IGFBP7,TMEM154
gene_set_query	900	ZFP90	0.3219	Enrichr Queries,0.3219	TINAGL1,ANXA1,ITPR1,FHL2,EMP1,IKZF1,PIK3R1,ETS1,IFIT3,PSMB8,IFIT2,ICAM1,LGALS3,CCND2,OLFML3,CCL2,CD44
gene_set_query	901	POU5F2	0.3223	GTEx Coexpression,0.3223	DNAH8,SPESP1,COX7B2,GTSF1,DSCR8
gene_set_query	902	ZGLP1	0.3225	ARCHS4 Coexpression,0.3225	CPNE5,PSTPIP2,DAPP1,BMP6
gene_set_query	903	HOXA13	0.323	GTEx Coexpression,0.323	GJC1,BMP4,PLA2G4A,KRT20,MATN2
gene_set_query	904	ZNF134	0.3231	ARCHS4 Coexpression,0.3231	ARMCX2,IGF2BP1,IGF2BP3,BCAT1
gene_set_query	905	PKNOX1	0.3232	ReMap ChIP-seq,0.3232	IFITM3,CPNE5,GSTP1,MACC1,IFI6,ICAM1,AGPAT4,BST2,PSTPIP2,KRT15,RAB34,RAC2,FXYD5,BCAT1,TGM2,MYO1G
gene_set_query	906	SEBOX	0.3234	Enrichr Queries,0.3234	TINAGL1,GPX3,PTGS2,IFIT3,ICAM1,LGALS3,CXCL10,CCND2,RAB34,ENPP2,S100A6,CCL2,PPARG,PHLDA1,S100A9,SULT1C4,TGM2
gene_set_query	907	ZNF675	0.3236	GTEx Coexpression,0.3236	MACC1,IL18,DAPP1,TP63,TMEM154
gene_set_query	908	ZNF81	0.3237	ARCHS4 Coexpression,0.3237	DOCK11,LRRK2,TLR4,SORL1
gene_set_query	909	ZNF20	0.3241	Enrichr Queries,0.3241	DUSP5,TINAGL1,ANXA1,TPM4,HFE,MX1,IFI6,FHL2,NR3C1,ETS1,ICAM1,CCND2,CHST15,IGF2BP3,PHLDA1,CD44,FBN1
gene_set_query	910	ZNF730	0.3243	ARCHS4 Coexpression,0.3243	GJC1,FAM9B,GABRA3,BCAT1
gene_set_query	911	POU3F4	0.3248	GTEx Coexpression,0.3248	CPNE5,PTPRO,HTR2C,CSMD3,ANO3
gene_set_query	912	NFIB	0.3255	GTEx Coexpression,0.3255	SFRP1,TINAGL1,KCTD12,TM4SF1,APOL3
gene_set_query	913	RHOXF1	0.3255	Enrichr Queries,0.3255	CHST9,RSAD2,ANXA3,GPX3,TMPRSS4,IFI6,PTGS2,CXCL10,CST1,TDO2,RGN,PPARG,PRAME,S100P,TP63,CES1,MATN2
gene_set_query	914	NEUROD4	0.3256	ARCHS4 Coexpression,0.3256	MPPED2,PAX3,CNGB3,RORB
gene_set_query	915	YY1	0.3261	GTEx Coexpression,0.3261	SEMA3D,MPPED2,LPCAT2,WDR72,SNX5
gene_set_query	916	NKX25	0.3262	ARCHS4 Coexpression,0.3262	CKMT2,FHL2,SMTNL2,TBX5
gene_set_query	917	ZNF226	0.3262	Enrichr Queries,0.3262	DUSP5,SP100,ANXA1,SAMD9,IFI44,PIK3R1,IFIT1,ETS1,IFIT3,IFIT2,LGALS3,CXCL10,CDK6,GPNMB,IFI16,TACC1,CD44
gene_set_query	918	ZC3H8	0.3266	ReMap ChIP-seq,0.3266	DUSP5,ANXA2,GINS4,EMP1,KLK10,VAV1,KLK11,IFIT2,OASL,KRT15,S100A6,SPATS2L,SFN,TACC1,TNS4,SLC16A5
gene_set_query	919	SHOX	0.3267	GTEx Coexpression,0.3267	FHL1,PPARG,NR3C1,APOL3,BMP6
gene_set_query	920	SOX11	0.3268	ARCHS4 Coexpression,0.3268	PTPRO,MPPED2,MKRN3,CD200
gene_set_query	921	HOXD13	0.3269	Enrichr Queries,0.3269	TINAGL1,PAX3,PTGS2,TBX5,ETS1,BMP7,BMP4,GREM1,CXCL10,SFRP1,COL2A1,CCND2,CDK6,PPARG,PITX2,FBN1
gene_set_query	922	LHX8	0.3274	ARCHS4 Coexpression,0.3274	MPPED2,GABRA3,HDAC9,CD200
gene_set_query	923	FOXD4	0.3276	Enrichr Queries,0.3276	IFITM3,DUSP5,TINAGL1,RSAD2,PAX3,IFIT1,IFIT3,IFIT2,BMP4,CXCL10,COL2A1,CCND2,PRDM16,CCL2,PITX2,PHLDA1
gene_set_query	924	ZNF621	0.3286	GTEx Coexpression,0.3286	MMP14,OLFML3,IFIT5,ENPP2,FBN1
gene_set_query	925	ZNF770	0.3292	ARCHS4 Coexpression,0.3292	ARMCX2,IGF2BP1,IGF2BP3,BCAT1
gene_set_query	926	E2F7	0.33	ReMap ChIP-seq,0.33	DUSP5,ANXA2,TPM4,HFE,IFIT3,TM4SF1,MMP14,APOL6,OLFML3,ARSJ,RAB34,S100A6,IGF2BP1,ZNF469,IGF2BP3,PHLDA1
gene_set_query	927	ZKSCAN1	0.3305	ENCODE ChIP-seq,0.3305	SLFN5,ANXA2,ASS1,ICAM1
gene_set_query	928	KAT7	0.3311	GTEx Coexpression,0.3311	DNAH8,SPESP1,DDX43,GTSF1,DSCR8
gene_set_query	929	MBD1	0.3311	ARCHS4 Coexpression,0.3311	IL4R,MSN,HLA-A,MYO1G
gene_set_query	930	FOXP1	0.3317	ARCHS4 Coexpression,0.3317	SP100,MACC1,TRIM38,NCALD
gene_set_query	931	PEG3	0.3323	GTEx Coexpression,0.3323	GABRA3,PNMA5,HTR2C,CSMD3,CD200
gene_set_query	932	LHX4	0.3329	ARCHS4 Coexpression,0.3329	IGF2BP1,CNGB3,IGF2BP3,RORB
gene_set_query	933	MBD6	0.3342	ARCHS4 Coexpression,0.3342	IFITM2,IL4R,HLA-A,S100A9
gene_set_query	934	MEIS1	0.3348	Enrichr Queries,0.3348	TINAGL1,ANXA1,FHL2,EMP1,MITF,PIK3R1,NR3C1,ETS1,CXCL10,SFRP1,CCND2,CDK6,IGFBP7,PHLDA1,CD44,FBN1
gene_set_query	935	TFDP2	0.3354	ARCHS4 Coexpression,0.3354	GJC1,CDK6,MYOF,HLA-A
gene_set_query	936	E2F5	0.3362	Enrichr Queries,0.3362	DUSP5,TINAGL1,ITPR1,EMP1,AHR,PTGS2,ETS1,CXCL10,CCND2,CDK6,IGF2BP3,BCAT1,PHLDA1,CD200,CD44,TGM2
gene_set_query	937	ZNF224	0.3366	ARCHS4 Coexpression,0.3366	APOL6,KYNU,DDX60,XAF1
gene_set_query	938	SOX6	0.3378	ARCHS4 Coexpression,0.3378	BCHE,MPPED2,MSN,CSMD3
gene_set_query	939	ZNF704	0.3385	GTEx Coexpression,0.3385	ARMCX1,PRDM16,ITPR1,PLS3,IGFBP7
gene_set_query	940	ZNF583	0.3397	Enrichr Queries,0.3397	DUSP5,SLFN5,SAMD9L,ANXA1,ETS1,HDAC9,SORL1,IFIT3,IFIT2,CXCL10,CCND2,CDK6,CCL2,KCTD12,BCAT1,FBN1
gene_set_query	941	ZBTB11	0.3403	ARCHS4 Coexpression,0.3403	DOCK11,IKZF1,NR3C1,ETS1
gene_set_query	942	ZNF354B	0.3405	Enrichr Queries,0.3405	DUSP5,SAMD9L,TINAGL1,RSAD2,IFI44,PTGS2,NR3C1,IFIT3,IFIT2,CXCL10,OAS1,RGS1,KCTD12,XAF1,BCAT1,PHLDA1
gene_set_query	943	NKX32	0.341	GTEx Coexpression,0.341	GJC1,BCHE,UBXN10,ITGA1,PLA2G4A
gene_set_query	944	ATF7	0.3415	ARCHS4 Coexpression,0.3415	FHL1,MSN,IGFBP7,KCTD12
gene_set_query	945	ZNF804B	0.3416	GTEx Coexpression,0.3416	SEMA3D,MPPED2,LPCAT2,WDR72,SNX5
gene_set_query	946	ZBTB20	0.3419	Enrichr Queries,0.3419	TINAGL1,ANXA1,ITPR1,EMP1,PIK3R1,NR3C1,ETS1,HDAC9,SORL1,CXCL10,CCND2,CDK6,IGFBP7,PHLDA1,CD44,FBN1
gene_set_query	947	ZNF302	0.3423	GTEx Coexpression,0.3423	PYCARD,DAPP1,FXYD5,CD44,TMEM154
gene_set_query	948	RBPJL	0.3434	ARCHS4 Coexpression,0.3434	CLDN10,OAF,TM4SF1,KLK11
gene_set_query	949	ELF2	0.344	ARCHS4 Coexpression,0.344	SP100,LRRK2,XAF1,TMEM154
gene_set_query	950	NFE2L1	0.3446	ARCHS4 Coexpression,0.3446	CKMT2,MMP14,MYOF,FHL1
gene_set_query	951	HNF1A	0.3447	GTEx Coexpression,0.3447	TDO2,BHMT2,SLCO1B3,GBA3,ASS1
gene_set_query	952	ZNF787	0.346	GTEx Coexpression,0.346	PYCARD,IFITM2,ARHGDIB,RAC2,VAV1
gene_set_query	953	TBPL2	0.3466	GTEx Coexpression,0.3466	LGALS3,PPP1R14C,POF1B,KRT20,CLDN1
gene_set_query	954	PURA	0.3471	ARCHS4 Coexpression,0.3471	VSNL1,PIK3R1,HS6ST3,ANO3
gene_set_query	955	TCFL5	0.3476	Enrichr Queries,0.3476	DUSP5,TINAGL1,ANXA1,GPX3,FHL2,EMP1,PTGS2,ETS1,CXCL10,CCND2,GPNMB,ENPP2,CCL2,BCAT1,PHLDA1,CD44
gene_set_query	956	ZNF841	0.3483	Enrichr Queries,0.3483	DUSP5,SLFN5,SP100,TINAGL1,ANXA1,IFI6,PIK3R1,AHR,PTGS2,CLDN1,ETS1,HDAC9,IFI44L,ICAM1,CXCL10,CDK6
gene_set_query	957	ZNF248	0.3489	ARCHS4 Coexpression,0.3489	PTPRO,MSN,TRPM6,CD200
gene_set_query	958	DMTF1	0.349	Enrichr Queries,0.349	DUSP5,TINAGL1,ANXA1,ITPR1,FHL2,PIK3R1,PTGS2,NR3C1,ETS1,ICAM1,CXCL10,CCND2,CDK6,CCL2,PPARG,CD44
gene_set_query	959	ZNF146	0.3495	ARCHS4 Coexpression,0.3495	IGF2BP1,PLS3,IGF2BP3,BCAT1
gene_set_query	960	POU4F1	0.3501	ARCHS4 Coexpression,0.3501	SERTAD4,NCALD,XG,AGPAT4
gene_set_query	961	SOX5	0.3511	Enrichr Queries,0.3511	TINAGL1,ITPR1,MITF,PIK3R1,RORB,NR3C1,ETS1,HDAC9,NCALD,CXCL10,SFRP1,CCND2,CDK6,ENPP2,ELMO1,FBN1
gene_set_query	962	ZNF133	0.352	ARCHS4 Coexpression,0.352	TPM4,MPPED2,MSN,MKRN3
gene_set_query	963	ASCL4	0.3522	GTEx Coexpression,0.3522	POF1B,GPRC5D,CLDN1,TMPRSS13,TP63
gene_set_query	964	CREB3L3	0.3526	Enrichr Queries,0.3526	IFITM3,TINAGL1,RSAD2,GPX3,PTGS2,ASS1,ICAM1,OASL,LGALS3,CXCL10,TDO2,RGN,ENPP2,UGT2A3,PHLDA1,TGM2
gene_set_query	965	ZNF534	0.3526	ARCHS4 Coexpression,0.3526	NLRP2,DDX43,COX7B2,OOEP
gene_set_query	966	ZBTB7A	0.3535	GTEx Coexpression,0.3535	CSTA,TTC22,HEXA,TMPRSS4,SFN
gene_set_query	967	POU4F2	0.3541	GTEx Coexpression,0.3541	DNAH8,SPESP1,COX7B2,GTSF1,DSCR8
gene_set_query	968	FOXD2	0.3547	Enrichr Queries,0.3547	DUSP5,TINAGL1,FHL2,PTGS2,ASCL2,ETS1,BMP7,BMP4,CXCL10,SFRP1,CCND2,PRDM16,PPARG,IGFBP7,PITX2,PHLDA1
gene_set_query	969	ZFP69	0.355	ARCHS4 Coexpression,0.355	SLFN11,SAMD9,OOEP,IL27RA
gene_set_query	970	DACH2	0.3557	ARCHS4 Coexpression,0.3557	PTPRO,MSN,CD200,HS6ST3
gene_set_query	971	ZNF574	0.3559	GTEx Coexpression,0.3559	DNAH8,SPESP1,COX7B2,GTSF1,DSCR8
gene_set_query	972	ZNF395	0.3561	Enrichr Queries,0.3561	IFITM3,DUSP5,TINAGL1,ANXA1,EMP1,PIK3R1,PTGS2,NR3C1,ETS1,SORL1,ICAM1,LGALS3,CDK6,CCL2,PHLDA1,CD44
gene_set_query	973	OVOL3	0.3566	GTEx Coexpression,0.3566	DNAH8,PRAME,COX7B2,GTSF1,DSCR8
gene_set_query	974	DRAP1	0.3575	ARCHS4 Coexpression,0.3575	MMP14,MYOF,MSN,FXYD5
gene_set_query	975	DMRTB1	0.3578	GTEx Coexpression,0.3578	DNAH8,SPESP1,COX7B2,GTSF1,DSCR8
gene_set_query	976	ZNF554	0.359	Enrichr Queries,0.359	DUSP5,SLFN5,TINAGL1,MX1,ITPR1,AHR,IFIT1,NR3C1,IFIT3,THSD4,ASS1,IFIT2,CXCL10,APOL6,LAMP3,JAK3
gene_set_query	977	ZNF582	0.3597	Enrichr Queries,0.3597	DUSP5,SAMD9L,TINAGL1,ANXA1,GPX3,PIK3R1,PTGS2,HDAC9,IFIT3,ICAM1,CXCL10,CCND2,EPB41L3,EPSTI1,ENPP2,BCAT1
gene_set_query	978	CUX1	0.3598	Literature ChIP-seq,0.3598	PTPRO,IFIT5,IFIT2,KYNU,ARHGDIB,RAC2,MAGEA3,SSX1,DUSP5,ANXA3,EMP1,MITF,HLA-A,TMPRSS11E,TM4SF1,ARMCX2,VSNL1,RAB34,CLIP4,SLC9A9,S100A6,ELMO1,CHI3L1,PPARG,TLR4,SAMD9,RGS13,IFI6,PIK3R1,FBLN2,THSD4,NCALD,CCL2,ST3GAL6,PRAME,IGF2BP3,APOL1,GBP1,APOL3,DSCR8,MPZL2,ERAP2,AKR1C1,XG,TMEM154,CDK6,FABP5,LPAR6,UBXN10,FAS,TRIM38
gene_set_query	979	XBP1	0.36	ARCHS4 Coexpression,0.36	GJC1,IGF2BP3,S100P,BMP7
gene_set_query	980	ZNF157	0.3604	Enrichr Queries,0.3604	DUSP5,TINAGL1,MX2,MX1,FHL2,IFI44,RORB,IFIT1,CLDN1,IFI44L,IFIT2,OASL,FERMT1,CXCL10,VSNL1,LAMP3
gene_set_query	981	NFYB	0.3615	GTEx Coexpression,0.3615	DENND2D,ARMCX1,RAB34,ITGA1
gene_set_query	982	ZNF790	0.3618	Enrichr Queries,0.3618	DUSP5,SLFN5,SAMD9L,IFI44,PIK3R1,IFIT1,DDX60,IFIT3,IFIT2,ICAM1,BMP4,CXCL10,SERTAD4,PHLDA1,PLTP,FBN1
gene_set_query	983	SP1	0.3624	ARCHS4 Coexpression,0.3624	LRRK2,CHST15,MSN,TLR4
gene_set_query	984	FOXO3	0.3636	ARCHS4 Coexpression,0.3636	LRRK2,CHST15,TLR4,SORL1
gene_set_query	985	SOX30	0.364	GTEx Coexpression,0.364	CRISP2,SPESP1,GTSF1,DSCR8
gene_set_query	986	ZBTB40	0.3643	ARCHS4 Coexpression,0.3643	IL4R,MSN,IKZF1,ETS1
gene_set_query	987	NPAS1	0.3653	GTEx Coexpression,0.3653	POF1B,GABRA3,TMPRSS13,NCALD
gene_set_query	988	MXI1	0.3659	GTEx Coexpression,0.3659	ITPR1,ATP10A,HDAC9,NKD1
gene_set_query	989	TBX10	0.3661	ARCHS4 Coexpression,0.3661	POF1B,B3GNT3,GBA3,KRT20
gene_set_query	990	ZNF347	0.3661	Enrichr Queries,0.3661	SLFN5,SP100,SAMD9L,SAMD9,ITGA2,IFIT1,NR3C1,DDX60,HDAC9,IFIT3,IFI44L,CXCL10,CCND2,CDK6,ZNF257,PHLDA1
gene_set_query	991	VAX1	0.3673	ARCHS4 Coexpression,0.3673	PRDM16,MPPED2,IGF2BP1,AGPAT4
gene_set_query	992	ZNF549	0.3675	Enrichr Queries,0.3675	IFITM3,DUSP5,IFITM2,ANXA1,ERAP2,MX1,IL18,IFI6,DAPP1,SEMA3E,AHR,ETS1,CXCL10,CCND2,CDK6
gene_set_query	993	PHOX2A	0.3678	GTEx Coexpression,0.3678	CCND2,RGN,IL13RA2,PAPSS2
gene_set_query	994	ZSCAN25	0.3679	ARCHS4 Coexpression,0.3679	ZYG11A,IKZF1,ETS1,DKK3
gene_set_query	995	NEUROG1	0.3682	Enrichr Queries,0.3682	TINAGL1,LAMA1,PAX3,FZD10,ASCL2,BMP7,IFIT2,BMP4,CXCL10,SFRP1,COL2A1,CCND2,PRDM16,PPARG,PITX2
gene_set_query	996	SCMH1	0.3684	GTEx Coexpression,0.3684	GJC1,RAB34,FHL1,ITGA1
gene_set_query	997	FOXP4	0.369	GTEx Coexpression,0.369	SULT1C2,COL2A1,PRDM16,B3GNT3
gene_set_query	998	LBX2	0.3692	ARCHS4 Coexpression,0.3692	OAF,HEXA,ST3GAL6,PHLDA1
gene_set_query	999	HOXD11	0.3697	Enrichr Queries,0.3697	TINAGL1,PAX3,PTGS2,TBX5,BMP4,GREM1,CXCL10,SFRP1,COL2A1,CCND2,PRDM16,IGF2BP1,CCL2,PPARG,PITX2
gene_set_query	1000	ZMAT4	0.3698	ARCHS4 Coexpression,0.3698	VSNL1,PTPRO,MSN,CSMD3
gene_set_query	1001	EN2	0.3704	ARCHS4 Coexpression,0.3704	SERTAD4,PAX3,FZD10,NCALD
gene_set_query	1002	ZNF672	0.371	ARCHS4 Coexpression,0.371	RAC2,HLA-A,HLA-E,MYO1G
gene_set_query	1003	TBPL1	0.3715	GTEx Coexpression,0.3715	CRISP2,SPESP1,GTSF1,DSCR8
gene_set_query	1004	MSANTD4	0.3716	ARCHS4 Coexpression,0.3716	ARMCX1,ARHGDIB,CD200,HLA-E
gene_set_query	1005	ZNF423	0.3718	Enrichr Queries,0.3718	GPX3,ITPR1,FBLN1,PIK3R1,FBLN2,BMP7,ASS1,CXCL10,SFRP1,CCND2,PRDM16,ENPP2,IGFBP7,MATN2,FBN1
gene_set_query	1006	FOXN4	0.3729	ARCHS4 Coexpression,0.3729	SERTAD4,MPPED2,RORB,AGPAT4
gene_set_query	1007	PRDM16	0.3734	GTEx Coexpression,0.3734	TINAGL1,PLS3,IGFBP7,ATP10A
gene_set_query	1008	ZNF491	0.3741	ARCHS4 Coexpression,0.3741	LGALS3,S100A6,FXYD5,PHLDA1
gene_set_query	1009	POU6F2	0.3746	GTEx Coexpression,0.3746	VSNL1,GABRA3,RORB,NCALD
gene_set_query	1010	GBX2	0.3746	Enrichr Queries,0.3746	DUSP5,TINAGL1,LAMA1,PAX3,FZD10,ETS1,BMP7,BMP4,SFRP1,COL2A1,CCND2,CCL2,PITX2,PHLDA1,CD44
gene_set_query	1011	NKX22	0.3747	ARCHS4 Coexpression,0.3747	CHST9,GPX3,ENPP2,PAPSS2
gene_set_query	1012	TBR1	0.3752	GTEx Coexpression,0.3752	VSNL1,GABRA3,RORB,NCALD
gene_set_query	1013	ZSCAN5C	0.3753	ARCHS4 Coexpression,0.3753	MAGEA12,PNMA5,MAGEA2B,OOEP
gene_set_query	1014	NEUROD1	0.3759	ARCHS4 Coexpression,0.3759	CHST9,GPX3,ENPP2,PAPSS2
gene_set_query	1015	ZNF732	0.3771	ARCHS4 Coexpression,0.3771	GJC1,IGF2BP1,IGF2BP3,BCAT1
gene_set_query	1016	NPAS4	0.3778	ARCHS4 Coexpression,0.3778	GPX3,ENPP2,PAPSS2,HS6ST3
gene_set_query	1017	POU2F1	0.3784	ARCHS4 Coexpression,0.3784	GJC1,IGF2BP1,IGF2BP3,HLA-A
gene_set_query	1018	ZNF845	0.3789	Enrichr Queries,0.3789	SLFN5,SP100,SAMD9L,SAMD9,FHL2,AHR,IFIT1,PARP14,DDX60,HDAC9,IFIT3,IFI44L,IFIT2,CXCL10,CDK6
gene_set_query	1019	SKOR1	0.379	ARCHS4 Coexpression,0.379	CCNB3,ITPR1,OOEP,BMP6
gene_set_query	1020	SOHLH1	0.3796	GTEx Coexpression,0.3796	VSNL1,GABRA3,RORB,NCALD
gene_set_query	1021	ZNF736	0.3796	ARCHS4 Coexpression,0.3796	APOL6,KYNU,XAF1,COX7B2
gene_set_query	1022	POU4F3	0.3802	GTEx Coexpression,0.3802	PRDM16,PLS3,IGFBP7,ATP10A
gene_set_query	1023	NR1I2	0.3802	ARCHS4 Coexpression,0.3802	TDO2,BHMT2,GBA3,KRT20
gene_set_query	1024	ZNF382	0.3803	Enrichr Queries,0.3803	SLFN5,SAMD9L,SAMD9,IFI6,IFIT1,HDAC9,IFI44L,NCALD,CXCL10,CCND2,CDK6,GPNMB,ENPP2,CCL2,BCAT1
gene_set_query	1025	ZNF384	0.3814	ENCODE ChIP-seq,0.3814	CRISP2,SLFN5,SAMD9L,SH3KBP1,DAPP1,LY96,DDX43,IL1RAP,NR3C1,ETS1,IL27RA,AGPAT4,PYCARD,RGS1,CCL2,CSMD3,CTSC,GBP3,DENND2D,KRT222,ZYG11A,ANXA2,PLEKHA2,EMP1,MMP14,TACC1
gene_set_query	1026	ZBTB17	0.3814	ARCHS4 Coexpression,0.3814	IL4R,HLA-A,ICAM1,MYO1G
gene_set_query	1027	ZNF479	0.3818	Enrichr Queries,0.3818	SAMD9L,TINAGL1,MACC1,SPINK5,IFIT3,IFIT2,ANO3,OASL,CXCL10,PRDM16,MKRN3,UGT2A3,CCL2,CSMD3,CES1
gene_set_query	1028	ZXDC	0.3821	ARCHS4 Coexpression,0.3821	IL4R,INPP5D,CHST15,RAC2
gene_set_query	1029	ZNF556	0.3825	Enrichr Queries,0.3825	DUSP5,SAMD9L,TINAGL1,SAMD9,CCL20,KLK10,HDAC9,CXCL10,APOL6,CCND2,PRDM16,IGF2BP1,CCL2,TNS4,CD44
gene_set_query	1030	OLIG1	0.3827	ARCHS4 Coexpression,0.3827	BCHE,SLITRK3,BMP7
gene_set_query	1031	ATF4	0.3838	ReMap ChIP-seq,0.3838	NQO1,SLFN5,CSTA,SP100,SH3KBP1,SPESP1,FHL2,IFIT3,ASS1,MMP14,APOL6,SPATS2L,S100P,XAF1,BCAT1
gene_set_query	1032	ZNF625	0.3852	GTEx Coexpression,0.3852	CD40,GINS4,IGF2BP3,ZNF257
gene_set_query	1033	ZNF418	0.3857	ARCHS4 Coexpression,0.3857	CCND2,MPPED2,MSN
gene_set_query	1034	ZSCAN23	0.3858	GTEx Coexpression,0.3858	OLFML3,ARSJ,IGF2BP3,FBN1
gene_set_query	1035	ZNF778	0.3864	ARCHS4 Coexpression,0.3864	GJC1,FAM9B,ZYG11A
gene_set_query	1036	ZNF501	0.3864	GTEx Coexpression,0.3864	OLFML3,ARSJ,IFIT5,FBN1
gene_set_query	1037	ZNF680	0.387	ARCHS4 Coexpression,0.387	MSN,HLA-A,HLA-E
gene_set_query	1038	WIZ	0.3871	GTEx Coexpression,0.3871	SPESP1,DDX43,COX7B2,DSCR8
gene_set_query	1039	ZBTB3	0.3882	Enrichr Queries,0.3882	DUSP5,TINAGL1,RSAD2,FHL2,ISG15,IFIT1,PTGS2,IFIT3,IFIT2,ICAM1,CXCL10,CCND2,CCL2,PHLDA1,CTSC
gene_set_query	1040	ZBED6	0.3882	ARCHS4 Coexpression,0.3882	KYNU,MYOF,AHR
gene_set_query	1041	TSC22D1	0.3889	Enrichr Queries,0.3889	IFITM3,DUSP5,IFITM2,TINAGL1,ANXA1,ANXA2,EMP1,PIK3R1,LGALS3,CCND2,S100A6,IGFBP7,PHLDA1,CD44,TGM2
gene_set_query	1042	ZBTB41	0.3894	ARCHS4 Coexpression,0.3894	ARHGDIB,CLIP4,HS6ST3
gene_set_query	1043	ZNF473	0.3895	GTEx Coexpression,0.3895	DNAH8,SPESP1,GTSF1,DSCR8
gene_set_query	1044	ZNF221	0.39	ARCHS4 Coexpression,0.39	FAM9B,ZYG11A,GINS4
gene_set_query	1045	PPARA	0.391	Enrichr Queries,0.391	TINAGL1,ITPR1,PIK3R1,AHR,NR3C1,ETS1,ASS1,ICAM1,LGALS3,CXCL10,CCND2,CDK6,PPARG,CD44,TGM2
gene_set_query	1046	ZNF367	0.3913	ARCHS4 Coexpression,0.3913	CPNE5,DAPP1,BMP6
gene_set_query	1047	TLX2	0.3914	GTEx Coexpression,0.3914	GJC1,GALNT12,CCND2,UBXN10
gene_set_query	1048	MTERF2	0.3919	ARCHS4 Coexpression,0.3919	TPM4,ENPP2,MSN
gene_set_query	1049	ZNF703	0.3925	Enrichr Queries,0.3925	DUSP5,TINAGL1,ANXA1,ANXA2,MYOF,FHL2,EMP1,PIK3R1,ETS1,BMP4,LGALS3,CCND2,PHLDA1,CD44,TGM2
gene_set_query	1050	NRL	0.3931	ARCHS4 Coexpression,0.3931	GPX3,RORB,DKK3
gene_set_query	1051	ZBTB47	0.3937	ARCHS4 Coexpression,0.3937	CKMT2,FHL1,SMTNL2
gene_set_query	1052	ZFP64	0.3939	GTEx Coexpression,0.3939	CDK6,POF1B,TP63,XG
gene_set_query	1053	ZNF592	0.3939	ReMap ChIP-seq,0.3939	PYCARD,KRT15,FBLN2,PLTP,THSD4
gene_set_query	1054	ZNF10	0.395	ARCHS4 Coexpression,0.395	TPM4,MSN,CD200
gene_set_query	1055	ZNF827	0.3951	GTEx Coexpression,0.3951	ARMCX2,MPPED2,ITPR1,IL1RAP
gene_set_query	1056	ZNF775	0.3956	ARCHS4 Coexpression,0.3956	RAC2,HLA-A,MYO1G
gene_set_query	1057	ZBTB2	0.3962	ARCHS4 Coexpression,0.3962	MSN,IKZF1,ETS1
gene_set_query	1058	TIGD1	0.3968	ARCHS4 Coexpression,0.3968	APOL6,KYNU,XAF1
gene_set_query	1059	ZNF565	0.3974	ARCHS4 Coexpression,0.3974	ANXA1,CD200,OASL
gene_set_query	1060	EBF4	0.3976	GTEx Coexpression,0.3976	ARMCX2,RAB34,MPPED2,MATN2
gene_set_query	1061	ZNF689	0.3983	GTEx Coexpression,0.3983	DNAH8,SPESP1,GTSF1,DSCR8
gene_set_query	1062	PHF1	0.3993	ARCHS4 Coexpression,0.3993	IL4R,HLA-A,HLA-E
gene_set_query	1063	DLX6	0.3995	GTEx Coexpression,0.3995	CPNE5,HTR2C,CSMD3,ANO3
gene_set_query	1064	MXD4	0.3996	Enrichr Queries,0.3996	IFITM3,DUSP5,TINAGL1,ANXA1,ANXA2,EMP1,PIK3R1,ETS1,LGALS3,CCND2,S100A6,KCTD12,PHLDA1,CD44,TGM2
gene_set_query	1065	ZFP30	0.4003	Enrichr Queries,0.4003	TINAGL1,ITPR1,FHL2,EMP1,PIK3R1,IFIT3,NCALD,BMP4,CXCL10,CCND2,CDK6,XAF1,PHLDA1,CTSC,FBN1
gene_set_query	1066	ZFP69B	0.4005	ARCHS4 Coexpression,0.4005	GABRA3,HDAC9,HLA-E
gene_set_query	1067	ZFP14	0.401	Enrichr Queries,0.401	SAMD9L,TINAGL1,RSAD2,PIK3R1,AHR,DDX60,SORL1,IFIT3,IFIT2,LGALS3,CXCL10,ENPP2,PHLDA1,GBP4,MATN2
gene_set_query	1068	ZSCAN29	0.4011	ARCHS4 Coexpression,0.4011	GJC1,IGF2BP1,IGF2BP3
gene_set_query	1069	ZNF292	0.4014	GTEx Coexpression,0.4014	CD40,CDK6,OAS2,IFI44L
gene_set_query	1070	OTP	0.402	GTEx Coexpression,0.402	GABRA3,PNMA5,CSMD3,CD200
gene_set_query	1071	ZNF471	0.4023	ARCHS4 Coexpression,0.4023	KYNU,IL1RAP,XAF1
gene_set_query	1072	ELK1	0.4024	Literature ChIP-seq,0.4024	DUSP5,ANXA1,ANXA2,ANXA3,PLEKHA2,MYOF,MX1,MSN,SEMA3E,PIK3R1,RORB,PTGS2,SORL1,CDH3,TACC1,IGFBP7,CD44
gene_set_query	1073	BSX	0.4032	GTEx Coexpression,0.4032	GABRA3,PNMA5,CSMD3,CD200
gene_set_query	1074	ZNF445	0.4042	ARCHS4 Coexpression,0.4042	GJC1,SULT1C2,KYNU
gene_set_query	1075	ZNF559	0.4063	GTEx Coexpression,0.4063	ARMCX1,ARMCX2,RAB34,MATN2
gene_set_query	1076	ZSCAN21	0.4066	ARCHS4 Coexpression,0.4066	LGALS3,FXYD5,OOEP
gene_set_query	1077	CBLL2	0.4067	Enrichr Queries,0.4067	LY6K,TINAGL1,SH3KBP1,MYOF,NR3C1,ASCL2,ETS1,CLDN10,CXCL10,VSNL1,CCL2,KCTD12,BCAT1,TLR4,TP63
gene_set_query	1078	ZNF85	0.407	GTEx Coexpression,0.407	CRISP2,DNAH8,GTSF1,DSCR8
gene_set_query	1079	ZNF441	0.4074	Enrichr Queries,0.4074	SLFN5,SAMD9L,ANXA1,SAMD9,PIK3R1,IL1RAP,IFIT1,DDX60,HDAC9,SORL1,NCALD,CXCL10,CDK6,KCTD12,CD44
gene_set_query	1080	SOX14	0.4076	GTEx Coexpression,0.4076	GABRA3,PNMA5,CSMD3,CD200
gene_set_query	1081	GATAD2A	0.4082	GTEx Coexpression,0.4082	ARMCX1,ASCL2,CD44,TMEM154
gene_set_query	1082	ZNF383	0.4088	Enrichr Queries,0.4088	DUSP5,SLFN5,IFI44,IFI35,IFIT1,DDX60,CLDN1,IFIT3,IFI44L,IFIT2,OASL,CXCL10,CD44,GBP4,GBP3
gene_set_query	1083	ARGFX	0.4091	ARCHS4 Coexpression,0.4091	APOL6,COX7B2,OOEP
gene_set_query	1084	MEF2D	0.4095	GTEx Coexpression,0.4095	FHL1,MITF,SMTNL2,ANO5
gene_set_query	1085	ZNF691	0.411	Enrichr Queries,0.411	DUSP5,TINAGL1,IFI44,PIK3R1,ETS1,IFIT3,CXCL10,CCND2,OLFML3,S100A6,PHLDA1,CTSC,CD44,GBP4,GBP3
gene_set_query	1086	ZNF277	0.4119	GTEx Coexpression,0.4119	CD40,SP100,FAS,TRIM38
gene_set_query	1087	MNT	0.4138	GTEx Coexpression,0.4138	IFITM2,IL4R,CHST15,S100A9
gene_set_query	1088	ZNF132	0.4138	Enrichr Queries,0.4138	DUSP5,RSAD2,MX2,MX1,IFIT1,PTGS2,IFIT3,IFI44L,BST2,CXCL10,CCND2,PRDM16,CCL2,IGFBP7,BCAT1
gene_set_query	1089	ZNF28	0.4145	Enrichr Queries,0.4145	DUSP5,SAMD9,ITGA2,MACC1,MYOF,PIK3R1,AHR,NR3C1,DDX60,HDAC9,IFIT3,CXCL10,CDK6,EPSTI1,BCAT1
gene_set_query	1090	ZNF84	0.4146	ARCHS4 Coexpression,0.4146	MPPED2,MSN,HLA-A
gene_set_query	1091	ZNF429	0.4151	GTEx Coexpression,0.4151	SRGN,IFITM2,ARHGDIB,SORL1
gene_set_query	1092	USF2	0.4153	ENCODE ChIP-seq,0.4153	IFITM3,SAMD9,GIMAP2,ITPR1,IFI35,IFIT1,PTGS2,CLDN1,AGPAT4,GPNMB,KYNU,TNS4,NQO1,HLA-H,MYOF,MX1,EMP1,TM4SF1,HLA-E,FERMT1,PLSCR1,OAS1,S100P,CPVL,TLR4,DNASE1L3,MYO1G
gene_set_query	1093	PRDM12	0.4157	GTEx Coexpression,0.4157	KRT222,GABRA3,PNMA5,CSMD3
gene_set_query	1094	NFXL1	0.4165	ARCHS4 Coexpression,0.4165	CCNB3,CCND2,ANXA2P1
gene_set_query	1095	ZNF30	0.4167	Enrichr Queries,0.4167	DUSP5,SLFN5,ITGA2,MX1,IFI44,PIK3R1,IFIT1,PTGS2,ETS1,SORL1,CXCL10,CCND2,KCTD12,PHLDA1,GBP3
gene_set_query	1096	GPBP1	0.4169	GTEx Coexpression,0.4169	FAM133A,MAGEA12,PRAME,MAGEA4
gene_set_query	1097	PRDM4	0.4175	GTEx Coexpression,0.4175	MMP14,ANXA2,TPM4,MYOF
gene_set_query	1098	ZNF747	0.4177	ARCHS4 Coexpression,0.4177	FAM9B,TPM4,MYOF
gene_set_query	1099	ZNF184	0.4183	ARCHS4 Coexpression,0.4183	CCND2,MPPED2,HDAC9
gene_set_query	1100	CENPS	0.4188	GTEx Coexpression,0.4188	SPESP1,COX7B2,GTSF1,DSCR8
gene_set_query	1101	ZNF26	0.4207	GTEx Coexpression,0.4207	CD40,MDFIC,IFI16,GINS4
gene_set_query	1102	CENPT	0.4214	ARCHS4 Coexpression,0.4214	CPNE5,DAPP1,HLA-E
gene_set_query	1103	HSF1	0.4219	GTEx Coexpression,0.4219	SPESP1,COX7B2,GTSF1,DSCR8
gene_set_query	1104	PKNOX2	0.4224	Enrichr Queries,0.4224	TINAGL1,FBLN1,PIK3R1,ETS1,NCALD,DKK3,CXCL10,SFRP1,CCND2,PRDM16,ENPP2,ELMO1,MATN2,FBN1
gene_set_query	1105	CRX	0.4231	Enrichr Queries,0.4231	TINAGL1,PAX3,MITF,RORB,PTGS2,NR3C1,ETS1,CXCL10,COL2A1,CCL2,PPARG,PITX2,CD44,TGM2
gene_set_query	1106	PLAGL2	0.4238	GTEx Coexpression,0.4238	DNAH8,NLRP2,GTSF1,DSCR8
gene_set_query	1107	ZNF98	0.4251	ARCHS4 Coexpression,0.4251	CLDN10,MSN,ZNF257
gene_set_query	1108	ZNF66	0.4256	GTEx Coexpression,0.4256	CD40,OAS2,GINS4,ZNF257
gene_set_query	1109	DR1	0.4269	GTEx Coexpression,0.4269	TP63,CD44,XG,TMEM154
gene_set_query	1110	NFIA	0.4275	ARCHS4 Coexpression,0.4275	BCHE,CCND2,MPPED2
gene_set_query	1111	ZNF708	0.4281	GTEx Coexpression,0.4281	ACER3,ENPP2,ELMO1,AGPAT4
gene_set_query	1112	DMRT3	0.4281	ARCHS4 Coexpression,0.4281	CCND2,PRDM16,MPPED2
gene_set_query	1113	VEZF1	0.4287	GTEx Coexpression,0.4287	GJC1,FHL1,ITGA1,MITF
gene_set_query	1114	NEUROD6	0.4294	ARCHS4 Coexpression,0.4294	PTPRO,MPPED2,CD200
gene_set_query	1115	FOXJ3	0.4294	GTEx Coexpression,0.4294	CLIP4,MITF,SMTNL2,NR3C1
gene_set_query	1116	PTF1A	0.4306	ARCHS4 Coexpression,0.4306	OAF,PAX3,TM4SF1
gene_set_query	1117	CXXC1	0.4312	ARCHS4 Coexpression,0.4312	RAC2,HLA-A,MYO1G
gene_set_query	1118	ZNF808	0.4323	Enrichr Queries,0.4323	SLFN5,TINAGL1,SAMD9,MX1,IFI6,PIK3R1,IFIT1,ETS1,SORL1,IFIT3,CXCL10,CDK6,OAS3,TACC1
gene_set_query	1119	ONECUT3	0.4325	GTEx Coexpression,0.4325	DNAH8,SPESP1,GTSF1,DSCR8
gene_set_query	1120	DPF3	0.4338	Enrichr Queries,0.4338	DUSP5,TINAGL1,MYOF,ITPR1,PIK3R1,ETS1,HDAC9,THSD4,NCALD,CXCL10,CCND2,CDK6,KCTD12,MATN2
gene_set_query	1121	FEZF2	0.4343	ARCHS4 Coexpression,0.4343	PRDM16,MPPED2,AGPAT4
gene_set_query	1122	ZNF75A	0.4345	Enrichr Queries,0.4345	DUSP5,SLFN5,IFI6,ITPR1,PIK3R1,IFIT1,NR3C1,ETS1,IFIT3,IFIT2,CDK6,GPNMB,CD44,GBP3
gene_set_query	1123	TBP	0.4356	GTEx Coexpression,0.4356	DNAH8,SPESP1,GTSF1,DSCR8
gene_set_query	1124	ZBED9	0.4368	GTEx Coexpression,0.4368	DNAH8,SPESP1,GTSF1,DSCR8
gene_set_query	1125	LHX9	0.4373	Enrichr Queries,0.4373	TINAGL1,PAX3,PTGS2,GREM1,SFRP1,COL2A1,SERTAD4,CCND2,PRDM16,ENPP2,IGF2BP1,CCL2,PITX2,CD44
gene_set_query	1126	NFAT5	0.4373	ARCHS4 Coexpression,0.4373	KYNU,TACC1,AHR
gene_set_query	1127	ZNF219	0.4375	GTEx Coexpression,0.4375	GJC1,RAB34,ITGA1,SEMA3E
gene_set_query	1128	GCM2	0.438	ARCHS4 Coexpression,0.438	EPB41L3,PLAT,CD200
gene_set_query	1129	TSHZ1	0.438	Enrichr Queries,0.438	DUSP5,TINAGL1,ANXA1,ITPR1,EMP1,PIK3R1,NR3C1,ETS1,SORL1,CCND2,KCTD12,PHLDA1,CD44,FBN1
gene_set_query	1130	YBX3	0.4386	ARCHS4 Coexpression,0.4386	CKMT2,FHL1,SMTNL2
gene_set_query	1131	ZBTB4	0.4395	Enrichr Queries,0.4395	TINAGL1,ANXA2,MYOF,ITPR1,PIK3R1,AHR,NR3C1,ETS1,SORL1,LGALS3,CCND2,TACC1,KCTD12,CD44
gene_set_query	1132	ZNF487	0.4409	Enrichr Queries,0.4409	DUSP5,TINAGL1,IFI6,PIK3R1,AHR,PTGS2,TM4SF1,ICAM1,CXCL10,CCL2,PHLDA1,CD44,FBN1,GBP3
gene_set_query	1133	ZNF24	0.4411	ReMap ChIP-seq,0.4411	TPM4,MACC1,TMPRSS4,IFI6,DAPP1,ISG15,IFI35,TMPRSS13,ICAM1,IL27RA,UBXN10,KRT15,RAB34,PRAME
gene_set_query	1134	DPRX	0.4412	GTEx Coexpression,0.4412	TCF15,SMTNL2,ANO5
gene_set_query	1135	ZNF710	0.4416	ARCHS4 Coexpression,0.4416	CHST15,HLA-A,TLR4
gene_set_query	1136	ZBTB12	0.4418	GTEx Coexpression,0.4418	OLFML3,ZNF469,IGF2BP3
gene_set_query	1137	POU5F1B	0.4429	ARCHS4 Coexpression,0.4429	SFRP1,TCF15,NCALD
gene_set_query	1138	DRGX	0.4431	GTEx Coexpression,0.4431	VSNL1,EPB41L3,GABRA3
gene_set_query	1139	SPDEF	0.4437	Enrichr Queries,0.4437	TINAGL1,TMPRSS4,FHL2,ETS1,TM4SF1,ICAM1,BMP4,LGALS3,CXCL10,PPARG,S100P,PHLDA1,CD44,TGM2
gene_set_query	1140	RORB	0.4443	GTEx Coexpression,0.4443	VSNL1,GABRA3,NCALD
gene_set_query	1141	ZNF256	0.4444	Enrichr Queries,0.4444	DUSP5,IFITM1,IFI6,IFIT1,CLDN1,SORL1,IFIT3,IFI44L,CXCL10,CCND2,EPSTI1,CCL2,S100P,PHLDA1
gene_set_query	1142	YBX1	0.4449	GTEx Coexpression,0.4449	SPESP1,GTSF1,DSCR8
gene_set_query	1143	IKZF4	0.4452	Enrichr Queries,0.4452	DUSP5,TINAGL1,PIK3R1,AHR,ETS1,SORL1,CXCL10,CCND2,CDK6,ENPP2,BCAT1,PHLDA1,CD200,CD44
gene_set_query	1144	SOX3	0.4456	GTEx Coexpression,0.4456	FAM133A,PNMA5,CSMD3
gene_set_query	1145	ZNF536	0.4459	Enrichr Queries,0.4459	PIK3R1,RORB,BMP7,HDAC9,SORL1,NCALD,CXCL10,SFRP1,PRDM16,MPPED2,ENPP2,ELMO1,CSMD3,MATN2
gene_set_query	1146	SPZ1	0.4462	GTEx Coexpression,0.4462	CRISP2,GTSF1,DSCR8
gene_set_query	1147	YBX2	0.4473	Enrichr Queries,0.4473	DUSP5,IFITM1,TINAGL1,ANXA1,GPX3,BMP7,SORL1,ASS1,BST2,CXCL10,SFRP1,S100A6,PHLDA1,S100A9
gene_set_query	1148	ZNF829	0.448	GTEx Coexpression,0.448	CRISP2,SPESP1,GTSF1
gene_set_query	1149	ZNF425	0.4487	Enrichr Queries,0.4487	DUSP5,SLFN5,RSAD2,MX1,IFI6,IFIT1,IFIT3,IFIT2,ICAM1,OASL,CXCL10,IFI27,PHLDA1,MATN2
gene_set_query	1150	CREB3L4	0.449	ARCHS4 Coexpression,0.449	MSN,TMPRSS13,DKK3
gene_set_query	1151	NOTO	0.4493	GTEx Coexpression,0.4493	GALNT12,B3GNT3,KRT20
gene_set_query	1152	KCMF1	0.4496	ARCHS4 Coexpression,0.4496	TPM4,MYOF,SMTNL2
gene_set_query	1153	ZNF483	0.4509	Enrichr Queries,0.4509	DUSP5,TINAGL1,GPX3,ITPR1,SEMA3E,SORL1,NCALD,CXCL10,CCND2,VSNL1,RASGEF1A,ENPP2,CD200,MATN2
gene_set_query	1154	CEBPZ	0.4509	ARCHS4 Coexpression,0.4509	IGF2BP1,IGF2BP3,BCAT1
gene_set_query	1155	FAM170A	0.4512	GTEx Coexpression,0.4512	COX7B2,GTSF1,DSCR8
gene_set_query	1156	KMT2A	0.4512	ReMap ChIP-seq,0.4512	SPESP1,IFIT5,IKZF1,PIK3R1,RORB,NR3C1,DOCK11,CDK6,CLEC2B,CHST15,FAS,IGFBP7,IGF2BP3,BCAT1
gene_set_query	1157	KLF1	0.4512	Literature ChIP-seq,0.4512	KRT222,SAMD9L,RSAD2,FHL2,EMP1,IKZF1,IFI35,TM4SF1,TMEM154,AGPAT4,LGALS3,APOL6,ACER3,ELMO1,BCAT1,TRPM6,TLR4,TGM2
gene_set_query	1158	ZNF274	0.4516	Enrichr Queries,0.4516	DUSP5,ANXA1,ITPR1,FHL2,PTGS2,NR3C1,ETS1,IFIT3,ICAM1,LGALS3,PLSCR1,CDK6,PPARG,CD44
gene_set_query	1159	GBX1	0.4521	ARCHS4 Coexpression,0.4521	CKMT2,FHL1,SMTNL2
gene_set_query	1160	PROX2	0.4523	Enrichr Queries,0.4523	DUSP5,TINAGL1,RSAD2,AHR,PTGS2,SORL1,IFIT3,CLDN10,CXCL10,GPNMB,RASGEF1A,OAS3,ELMO1,CD44
gene_set_query	1161	ZNF433	0.4536	GTEx Coexpression,0.4536	CRISP2,GTSF1,DSCR8
gene_set_query	1162	ZNF280B	0.4537	Enrichr Queries,0.4537	PIK3R1,PTGS2,ETS1,HDAC9,NCALD,CXCL10,SFRP1,CCND2,CDK6,PPARG,IGF2BP3,KCTD12,BCAT1,CD44
gene_set_query	1163	ZNF37A	0.4544	Enrichr Queries,0.4544	SLFN5,SAMD9,PIK3R1,IFIT1,PARP14,NR3C1,HDAC9,IFIT3,CDK6,IFI16,SPATS2L,TACC1,XAF1,BCAT1
gene_set_query	1164	ZNF707	0.4549	GTEx Coexpression,0.4549	DNAH8,PRAME,MAGEA4
gene_set_query	1165	ZNF580	0.4555	GTEx Coexpression,0.4555	ARMCX2,RAB34,MPPED2
gene_set_query	1166	ZNF385C	0.4558	Enrichr Queries,0.4558	DUSP5,TINAGL1,CPNE5,MX1,IFI6,IFIT1,FBLN2,SORL1,ICAM1,BST2,CXCL10,COL2A1,RASGEF1A,JAK3
gene_set_query	1167	ZNF616	0.4561	GTEx Coexpression,0.4561	BST2,HFE,FAS
gene_set_query	1168	ASCL1	0.457	ARCHS4 Coexpression,0.457	KRT222,IL1RAP,IFIT1
gene_set_query	1169	MYF6	0.4576	ARCHS4 Coexpression,0.4576	CKMT2,FHL1,SMTNL2
gene_set_query	1170	HSF2	0.458	GTEx Coexpression,0.458	SMTNL2,PITX2,ANO5
gene_set_query	1171	ZNF717	0.4587	Enrichr Queries,0.4587	TINAGL1,ANXA1,SEMA3D,MYOF,MITF,PIK3R1,HDAC9,IFI44L,CXCL10,CSMD3,PHLDA1,CES1,GBP3
gene_set_query	1172	ZNF674	0.4601	Enrichr Queries,0.4601	IFITM3,DUSP5,IFITM2,ANXA1,ANXA2,ERAP2,SH3KBP1,IL18,DAPP1,SEMA3E,AHR,APOL6,PHLDA1
gene_set_query	1173	CUX2	0.4605	GTEx Coexpression,0.4605	TDO2,GDA,SLCO1B3
gene_set_query	1174	ZNF705B	0.4611	GTEx Coexpression,0.4611	CRISP2,GTSF1,DSCR8
gene_set_query	1175	ZNF644	0.4613	ReMap ChIP-seq,0.4613	IFITM3,GALNT12,RSAD2,MACC1,ITPR1,FHL2,IFIT3,LGALS3,RAB34,ARHGDIB,S100P,BCAT1,MAGEA4,SLC16A5
gene_set_query	1176	ZNF718	0.4617	GTEx Coexpression,0.4617	CDK6,FAS,ZNF257
gene_set_query	1177	ZNF225	0.4619	ARCHS4 Coexpression,0.4619	FAM133A,SULT1C2,KLK11
gene_set_query	1178	ZNF667	0.4623	Enrichr Queries,0.4623	TINAGL1,ITPR1,EMP1,PIK3R1,PTGS2,ETS1,HDAC9,CXCL10,SFRP1,CCND2,BCAT1,CD200,CD44
gene_set_query	1179	LBX1	0.4625	ARCHS4 Coexpression,0.4625	CKMT2,FHL1,SMTNL2
gene_set_query	1180	ZNF705G	0.463	GTEx Coexpression,0.463	CRISP2,GTSF1,DSCR8
gene_set_query	1181	MESP1	0.4644	Enrichr Queries,0.4644	DUSP5,IFITM1,TINAGL1,ISG15,BMP7,ASS1,BMP4,CXCL10,SFRP1,S100A6,PPARG,IGFBP7,PHLDA1
gene_set_query	1182	SIX6	0.465	ARCHS4 Coexpression,0.465	IGF2BP1,RORB,BCAT1
gene_set_query	1183	ZNF154	0.4661	GTEx Coexpression,0.4661	ARMCX2,MPPED2,SLITRK3
gene_set_query	1184	ZNF189	0.4665	Enrichr Queries,0.4665	DUSP5,ANXA1,PIK3R1,PTGS2,IFIT3,LGALS3,CXCL10,SERTAD4,ELMO1,IGF2BP3,PHLDA1,CD44,MATN2
gene_set_query	1185	FOXB1	0.4668	ARCHS4 Coexpression,0.4668	GJC1,SULT1C2,IGF2BP1
gene_set_query	1186	ZNF71	0.4674	ARCHS4 Coexpression,0.4674	LGALS3,S100A6,FXYD5
gene_set_query	1187	ZNF514	0.4679	Enrichr Queries,0.4679	DUSP5,SAMD9,ERAP2,PLEKHA2,IFI6,PIK3R1,IFIT1,SORL1,IFIT3,CXCL10,GPNMB,KCTD12,XAF1
gene_set_query	1188	ZNF654	0.468	GTEx Coexpression,0.468	CLEC2B,TRIM38,NR3C1
gene_set_query	1189	AEBP2	0.4686	GTEx Coexpression,0.4686	GPNMB,MYOF,PLS3
gene_set_query	1190	ST18	0.4687	ARCHS4 Coexpression,0.4687	ENPP2,MSN,CD200
gene_set_query	1191	ZNF696	0.4693	ARCHS4 Coexpression,0.4693	GINS4,KCTD12,NCALD
gene_set_query	1192	CSRNP3	0.4699	ARCHS4 Coexpression,0.4699	PTPRO,CSMD3,HS6ST3
gene_set_query	1193	NEUROG3	0.4701	Enrichr Queries,0.4701	TINAGL1,PAX3,FZD10,ASCL2,BMP7,BMP4,CXCL10,SFRP1,COL2A1,CCND2,PRDM16,PPARG,PITX2
gene_set_query	1194	HES6	0.4708	Enrichr Queries,0.4708	IFITM3,DUSP5,TINAGL1,ANXA2,FHL2,ISG15,ASS1,LGALS3,CXCL10,CCND2,S100A6,PHLDA1,S100A9
gene_set_query	1195	NPAS3	0.4711	ARCHS4 Coexpression,0.4711	BCHE,MPPED2,NCALD
gene_set_query	1196	ZNF579	0.4717	GTEx Coexpression,0.4717	SMTNL2,PITX2,ANO5
gene_set_query	1197	USF3	0.4723	GTEx Coexpression,0.4723	SMTNL2,PITX2,ANO5
gene_set_query	1198	MYOG	0.4724	ARCHS4 Coexpression,0.4724	CKMT2,FHL1,SMTNL2
gene_set_query	1199	ZNF304	0.4729	Enrichr Queries,0.4729	DUSP5,ITPR1,PIK3R1,NR3C1,HDAC9,IFIT3,IFI44L,CXCL10,CDK6,CCL2,PHLDA1,CD44,MATN2
gene_set_query	1200	ZNF607	0.473	ARCHS4 Coexpression,0.473	CCNB3,IGF2BP1,HLA-E
gene_set_query	1201	ZNF45	0.4736	Enrichr Queries,0.4736	DUSP5,ANXA1,SAMD9,ITPR1,IFI44,PIK3R1,IFIT1,NR3C1,DDX60,IFIT3,IFIT2,CDK6,CD44
gene_set_query	1202	HMGA1	0.4742	ARCHS4 Coexpression,0.4742	CST1,IGF2BP1,IGF2BP3
gene_set_query	1203	ZNF385B	0.4748	ARCHS4 Coexpression,0.4748	SDR16C5,VSNL1,LAMP3
gene_set_query	1204	ZNF496	0.4754	ARCHS4 Coexpression,0.4754	GJC1,IGF2BP1,IGF2BP3
gene_set_query	1205	ETV2	0.4758	Enrichr Queries,0.4758	IFITM3,TINAGL1,ISG15,ASCL2,ETS1,BMP4,LGALS3,CXCL10,COL2A1,CCND2,S100A6,PPARG,PITX2
gene_set_query	1206	ZSCAN32	0.476	GTEx Coexpression,0.476	IFITM2,ARHGDIB,SORL1
gene_set_query	1207	HMG20A	0.476	ARCHS4 Coexpression,0.476	IGF2BP1,IGF2BP3,BCAT1
gene_set_query	1208	ZNF419	0.4765	Enrichr Queries,0.4765	DUSP5,SLFN5,MX1,IFI6,IFI44,PIK3R1,IFIT1,HDAC9,IFIT3,ASS1,IFIT2,OAS1,CD44
gene_set_query	1209	RFX7	0.4773	ARCHS4 Coexpression,0.4773	DOCK11,CDK6,IGF2BP1
gene_set_query	1210	ZNF200	0.4773	GTEx Coexpression,0.4773	DNAH8,GTSF1,DSCR8
gene_set_query	1211	ZNF782	0.4786	Enrichr Queries,0.4786	DUSP5,IFI6,ITPR1,PIK3R1,IFIT1,DDX60,SORL1,IFIT3,IFI44L,CXCL10,GPNMB,MATN2,FBN1
gene_set_query	1212	TIGD6	0.4791	ARCHS4 Coexpression,0.4791	TBX5,CSAG1
gene_set_query	1213	ZNF316	0.4792	GTEx Coexpression,0.4792	CHST15,JAK3,VAV1
gene_set_query	1214	SLC2A4RG	0.4798	GTEx Coexpression,0.4798	BHMT2,SLCO1B3,ASS1
gene_set_query	1215	ZNF714	0.4816	ARCHS4 Coexpression,0.4816	GJC1,MSN
gene_set_query	1216	ZNF460	0.4816	GTEx Coexpression,0.4816	CD40,FAS,NR3C1
gene_set_query	1217	CXXC4	0.4835	GTEx Coexpression,0.4835	GABRA3,CSMD3,CD200
gene_set_query	1218	ZNF420	0.484	ARCHS4 Coexpression,0.484	MPPED2,CD200
gene_set_query	1219	ZNF286A	0.4846	ARCHS4 Coexpression,0.4846	CCND2,BCAT1
gene_set_query	1220	MSANTD1	0.4848	GTEx Coexpression,0.4848	PNMA5,HTR2C,CSMD3
gene_set_query	1221	ADNP2	0.486	GTEx Coexpression,0.486	DDX43,TNS4,CLDN1
gene_set_query	1222	ZNF181	0.4865	ARCHS4 Coexpression,0.4865	BCHE,MSN
gene_set_query	1223	ZNF853	0.4871	ARCHS4 Coexpression,0.4871	FHL1,SMTNL2
gene_set_query	1224	ZNF211	0.4877	ARCHS4 Coexpression,0.4877	GALNT14,CSMD3
gene_set_query	1225	HES7	0.4879	Enrichr Queries,0.4879	IFITM3,DUSP5,IFITM1,TINAGL1,ISG15,PTGS2,ICAM1,CXCL10,CCND2,S100A6,CCL2,PPARG,PHLDA1
gene_set_query	1226	ZNF260	0.4883	ARCHS4 Coexpression,0.4883	MSN,HLA-A
gene_set_query	1227	ZNF570	0.4886	Enrichr Queries,0.4886	DUSP5,SLFN5,SAMD9L,SAMD9,IFI6,ITPR1,IFIT1,NR3C1,DDX60,HDAC9,IFI44L,CXCL10,FBN1
gene_set_query	1228	ZNF227	0.4889	ARCHS4 Coexpression,0.4889	MKRN3,OOEP
gene_set_query	1229	ZNF254	0.4902	ARCHS4 Coexpression,0.4902	MSN,CD200
gene_set_query	1230	ZNF160	0.4904	GTEx Coexpression,0.4904	BST2,SLFN11,SEMA3D
gene_set_query	1231	ZNF695	0.4908	ARCHS4 Coexpression,0.4908	MSN,HLA-A
gene_set_query	1232	BRF2	0.4916	ReMap ChIP-seq,0.4916	ANKDD1A,NQO1,TINAGL1,TTC22,GINS4,ITGA1,SLC12A1,IFI6,FHL2,IFIT1,ASCL2,IFIT3,SFN
gene_set_query	1233	ZNF480	0.4926	ARCHS4 Coexpression,0.4926	KYNU,XAF1
gene_set_query	1234	ZNF470	0.4929	Enrichr Queries,0.4929	TINAGL1,MX1,IFI44,AHR,IFIT1,HDAC9,SORL1,IFIT3,IFI44L,ICAM1,CXCL10,XAF1,GBP4
gene_set_query	1235	SOX1	0.4935	GTEx Coexpression,0.4935	GABRA3,PNMA5,CSMD3
gene_set_query	1236	ZNF619	0.4936	Enrichr Queries,0.4936	DUSP5,SLFN5,SP100,HFE,MITF,PIK3R1,AHR,PARP14,DDX60,IFIT3,CXCL10,APOL6,OAS1
gene_set_query	1237	ZNF484	0.4943	Enrichr Queries,0.4943	DUSP5,ANXA1,SAMD9,PLA2G4A,AHR,PARP14,DDX60,HDAC9,SORL1,IFIT3,CXCL10,CDK6,TLR4
gene_set_query	1238	ZNF143	0.4945	ARCHS4 Coexpression,0.4945	CCNB3,CCL20
gene_set_query	1239	ZNF740	0.4949	ReMap ChIP-seq,0.4949	TPM4,SPESP1,ISG15,IFI35,PIK3R1,IL27RA,BST2,CCND2,CDK6,RAB34,IGF2BP1,PRAME,FXYD5
gene_set_query	1240	ZNF705D	0.495	Enrichr Queries,0.495	TINAGL1,RSAD2,HFE,WDR72,ATP10A,IKZF1,RORB,COX7B2,CXCL10,PPARG,CSMD3,ZNF257,TP63
gene_set_query	1241	ZNF77	0.4951	ARCHS4 Coexpression,0.4951	GTSF1,OOEP
gene_set_query	1242	ZSCAN5A	0.4966	GTEx Coexpression,0.4966	CRISP2,GTSF1,DSCR8
gene_set_query	1243	SOX8	0.4979	Enrichr Queries,0.4979	DUSP5,TINAGL1,PTGS2,BMP7,NCALD,BMP4,CXCL10,SFRP1,CCND2,ENPP2,CCL2,PHLDA1,MATN2
gene_set_query	1244	ZNF197	0.4982	ARCHS4 Coexpression,0.4982	HLA-A,HLA-E
gene_set_query	1245	ZNF584	0.4983	ReMap ChIP-seq,0.4983	IFITM3,GALNT12,ANXA1,CPNE5,MACC1,FHL2,ISG15,TMEM154,PLSCR1,IFI16,S100A6,XIST,XAF1
gene_set_query	1246	ZNF253	0.4988	ARCHS4 Coexpression,0.4988	MYOF,MSN
gene_set_query	1247	ZNF648	0.4991	GTEx Coexpression,0.4991	TDO2,BHMT2,SLCO1B3
gene_set_query	1248	THAP9	0.4994	ARCHS4 Coexpression,0.4994	GJC1,MSN
gene_set_query	1249	THAP5	0.4997	GTEx Coexpression,0.4997	LGALS3,GSTP1,CD44
gene_set_query	1250	ZBTB46	0.5	Enrichr Queries,0.5	DUSP5,TINAGL1,EMP1,IKZF1,ETS1,ICAM1,CXCL10,CCND2,CHST15,ENPP2,CCL2,PLTP,TGM2
gene_set_query	1251	ZNF721	0.5	ARCHS4 Coexpression,0.5	TPM4,MSN
gene_set_query	1252	MLXIP	0.5003	GTEx Coexpression,0.5003	MITF,SMTNL2,PITX2
gene_set_query	1253	ZNF141	0.5007	Enrichr Queries,0.5007	SAMD9,ITPR1,PIK3R1,HDAC9,SORL1,IFI44L,SLFN13,CXCL10,CCND2,CDK6,IFI16,IGF2BP1,CD44
gene_set_query	1254	ZNF33A	0.5012	ARCHS4 Coexpression,0.5012	TPM4,CD200
gene_set_query	1255	ZNF598	0.5016	GTEx Coexpression,0.5016	TNS4,TMPRSS13,CD44
gene_set_query	1256	SNAPC4	0.5017	ReMap ChIP-seq,0.5017	LY6K,IFI44,KRT5,IL1RAP,NR3C1,ASCL2,VAV1,IFI44L,CDH3,INPP5D,SLITRK3,S100A6,TNS4
gene_set_query	1257	GATAD2B	0.5028	GTEx Coexpression,0.5028	INPP5D,RAC2,MYO1G
gene_set_query	1258	ZNF620	0.5028	Enrichr Queries,0.5028	DUSP5,ITGA2,MACC1,GINS4,IFIT1,IFIT3,IFIT2,BST2,CXCL10,CCND2,EPSTI1,IGF2BP1,CD200
gene_set_query	1259	ZNF883	0.5031	ARCHS4 Coexpression,0.5031	BCHE,MSN
gene_set_query	1260	ZNF410	0.5037	ARCHS4 Coexpression,0.5037	CLEC2B,UBE2L6
gene_set_query	1261	UBP1	0.504	GTEx Coexpression,0.504	ARSJ,ITGA1,ITPR1
gene_set_query	1262	CPEB1	0.5047	GTEx Coexpression,0.5047	FAM133A,EPB41L3,AGPAT4
gene_set_query	1263	CDC5L	0.5049	ARCHS4 Coexpression,0.5049	HLA-A,HLA-E
gene_set_query	1264	ZNF492	0.5055	ARCHS4 Coexpression,0.5055	ZYG11A,IFIT5
gene_set_query	1265	GTF2IRD2	0.5057	Enrichr Queries,0.5057	DUSP5,SP100,ITPR1,PIK3R1,NR3C1,ETS1,IFIT2,ICAM1,LGALS3,CXCL10,CCND2,PHLDA1,CD44
gene_set_query	1266	ZNF19	0.5059	GTEx Coexpression,0.5059	DNAH8,DDX43,DSCR8
gene_set_query	1267	ZSCAN2	0.5061	ARCHS4 Coexpression,0.5061	GJC1,MYOF
gene_set_query	1268	CENPA	0.5072	GTEx Coexpression,0.5072	OAS2,GINS4,IGF2BP3
gene_set_query	1269	ZNF33B	0.5074	ARCHS4 Coexpression,0.5074	MMP14,TPM4
gene_set_query	1270	NR1I3	0.5078	GTEx Coexpression,0.5078	TDO2,BHMT2,SLCO1B3
gene_set_query	1271	VAX2	0.5085	Enrichr Queries,0.5085	TINAGL1,PAX3,FBLN2,BMP7,BMP4,LGALS3,CXCL10,SFRP1,COL2A1,PRDM16,PPARG,PITX2
gene_set_query	1272	ZNF280D	0.5086	ARCHS4 Coexpression,0.5086	KYNU,XAF1
gene_set_query	1273	ZNF398	0.509	GTEx Coexpression,0.509	PYCARD,ASCL2,TMEM154
gene_set_query	1274	CAMTA1	0.5092	ARCHS4 Coexpression,0.5092	CPNE5,VSNL1
gene_set_query	1275	ONECUT2	0.5103	GTEx Coexpression,0.5103	TDO2,SLCO1B3,ANO3
gene_set_query	1276	ZNF286B	0.5104	ARCHS4 Coexpression,0.5104	MPPED2,MSN
gene_set_query	1277	INSM2	0.5109	GTEx Coexpression,0.5109	KRT222,GABRA3,CSMD3
gene_set_query	1278	ZNF512	0.5117	ARCHS4 Coexpression,0.5117	MKRN3,CD200
gene_set_query	1279	TFAP4	0.5118	ReMap ChIP-seq,0.5118	TPM4,ISG15,IFI35,TM4SF1,VAV1,ICAM1,BMP4,RAB34,IGF2BP3,S100P,DNASE1L3,PLTP,SLC16A5
gene_set_query	1280	NFYA	0.5121	GTEx Coexpression,0.5121	DNAH8,GTSF1,DSCR8
gene_set_query	1281	NFX1	0.5129	ARCHS4 Coexpression,0.5129	KYNU,XAF1
gene_set_query	1282	ZNF735	0.5141	ARCHS4 Coexpression,0.5141	MAGEA12,OOEP
gene_set_query	1283	ZNF646	0.5152	GTEx Coexpression,0.5152	DNAH8,GTSF1,DSCR8
gene_set_query	1284	FOXD4L1	0.5154	ARCHS4 Coexpression,0.5154	CCNB3,TMEM154
gene_set_query	1285	ZNF138	0.5165	GTEx Coexpression,0.5165	IFITM3,ITGA1,TP63
gene_set_query	1286	ZNF606	0.5166	ARCHS4 Coexpression,0.5166	MSN,CD200
gene_set_query	1287	ZNF724	0.5171	GTEx Coexpression,0.5171	OAS2,GINS4,IGF2BP3
gene_set_query	1288	ZNF888	0.5177	GTEx Coexpression,0.5177	CDK6,GINS4,IGF2BP3
gene_set_query	1289	ZIC1	0.5178	Enrichr Queries,0.5178	TINAGL1,PAX3,PIK3R1,BMP7,BMP4,CXCL10,SFRP1,CCND2,ENPP2,CCL2,PITX2,FBN1
gene_set_query	1290	ZNF136	0.5185	Enrichr Queries,0.5185	SLFN5,ANXA1,SAMD9,PIK3R1,AHR,IFIT1,NR3C1,DDX60,ETS1,IFIT3,ICAM1,CD44
gene_set_query	1291	SKOR2	0.519	GTEx Coexpression,0.519	PRAME,MAGEA3,MAGEA4
gene_set_query	1292	ZNF169	0.5215	GTEx Coexpression,0.5215	RASGEF1A,ELMO1,SORL1
gene_set_query	1293	NKRF	0.5221	GTEx Coexpression,0.5221	KRT222,VSNL1,GABRA3
gene_set_query	1294	ZBTB21	0.5221	ARCHS4 Coexpression,0.5221	DUSP5,DSCR8
gene_set_query	1295	ZBTB39	0.5227	GTEx Coexpression,0.5227	DNAH8,SPESP1,DDX43
gene_set_query	1296	ZNF726	0.5233	GTEx Coexpression,0.5233	CDK6,MACC1,GINS4
gene_set_query	1297	SETDB1	0.5244	Literature ChIP-seq,0.5244	IFITM3,LY6K,CSTA,CPNE5,LAMA1,GSTP1,LRRK2,HEXA,TACSTD2,DAPP1,FBLN1,NR3C1,ASCL2,THSD4,AGPAT4,SULT1C2,CDH3,PITX2,PLTP,GBP4,GBP3,TCF15,GINS4,PAX3,MITF,TMPRSS13,BMP6,DKK3,CDK6,MKRN3,S100A9
gene_set_query	1298	PRDM15	0.5252	ARCHS4 Coexpression,0.5252	ZYG11A,RGS13
gene_set_query	1299	ZNF493	0.5258	ARCHS4 Coexpression,0.5258	PPARG,NCALD
gene_set_query	1300	TEF	0.5264	Enrichr Queries,0.5264	IFITM3,TINAGL1,ITPR1,PIK3R1,NR3C1,SORL1,LGALS3,CXCL10,CCND2,ENPP2,S100A6,PHLDA1
gene_set_query	1301	PRDM10	0.5264	ARCHS4 Coexpression,0.5264	CCNB3,OOEP
gene_set_query	1302	GMEB2	0.527	ARCHS4 Coexpression,0.527	IL4R,HLA-A
gene_set_query	1303	HINFP	0.5286	ReMap ChIP-seq,0.5286	IFITM3,DUSP5,IFITM1,IFITM2,CPNE5,GSTP1,HFE,FHL2,VAV1,CLDN10,RAC2,IGF2BP3
gene_set_query	1304	DOT1L	0.5296	GTEx Coexpression,0.5296	DNAH8,GTSF1,DSCR8
gene_set_query	1305	ZNF577	0.5306	Enrichr Queries,0.5306	ERAP2,IFI6,SEMA3E,PIK3R1,SORL1,IFI44L,NCALD,CXCL10,CCND2,CDK6,GPNMB,CD44
gene_set_query	1306	ZNF784	0.5307	ARCHS4 Coexpression,0.5307	CKMT2,SMTNL2
gene_set_query	1307	OLIG3	0.5308	GTEx Coexpression,0.5308	CLDN10,TACSTD2,KLK11
gene_set_query	1308	ZNF326	0.5313	ARCHS4 Coexpression,0.5313	MSN,HLA-A
gene_set_query	1309	DUX4	0.532	ReMap ChIP-seq,0.532	SP100,ANXA3,IFI44,AHR,THSD4,TMEM71,BMP4,PLSCR1,RGS1,KYNU,FAS,MYO1G
gene_set_query	1310	GMEB1	0.532	GTEx Coexpression,0.532	PYCARD,RAC2,VAV1
gene_set_query	1311	ZNF551	0.5332	ARCHS4 Coexpression,0.5332	GJC1,GINS4
gene_set_query	1312	ATOH7	0.5333	GTEx Coexpression,0.5333	KRT222,VSNL1,GDA
gene_set_query	1313	ZNF287	0.5335	Enrichr Queries,0.5335	DUSP5,SLFN5,TINAGL1,IFI6,PIK3R1,NR3C1,IFIT2,CXCL10,CDK6,GPNMB,IGF2BP3,PHLDA1
gene_set_query	1314	ZNF283	0.5342	Enrichr Queries,0.5342	DUSP5,TINAGL1,SAMD9,ANXA3,MYOF,FHL2,PIK3R1,ETS1,IFI44L,CXCL10,CDK6,PHLDA1
gene_set_query	1315	RXRB	0.5344	ARCHS4 Coexpression,0.5344	MSN,HLA-A
gene_set_query	1316	ZNF781	0.535	ARCHS4 Coexpression,0.535	APOL6,XAF1
gene_set_query	1317	ZSCAN30	0.5356	ARCHS4 Coexpression,0.5356	KYNU,XAF1
gene_set_query	1318	ZNF566	0.5363	Enrichr Queries,0.5363	TINAGL1,ANXA1,PIK3R1,AHR,NR3C1,DDX60,IFIT3,CXCL10,CCND2,CDK6,IGF2BP3,PHLDA1
gene_set_query	1319	TMF1	0.5364	GTEx Coexpression,0.5364	CRISP2,SPESP1
gene_set_query	1320	BHLHE22	0.5381	ARCHS4 Coexpression,0.5381	CD40,PTPRO
gene_set_query	1321	ZNF506	0.5385	Enrichr Queries,0.5385	SLFN5,SAMD9,MX1,IFI44,PIK3R1,SORL1,IFI44L,CCND2,CDK6,GPNMB,ZNF257,CD44
gene_set_query	1322	ZBTB43	0.5389	GTEx Coexpression,0.5389	CLIP4,SMTNL2
gene_set_query	1323	ZNF639	0.5401	GTEx Coexpression,0.5401	FHL1,ITGA1
gene_set_query	1324	MEIS3	0.5413	Enrichr Queries,0.5413	TINAGL1,ETS1,NCALD,ASS1,DKK3,CXCL10,SFRP1,CCND2,OLFML3,CHST15,TGM2,FBN1
gene_set_query	1325	PATZ1	0.542	GTEx Coexpression,0.542	MPPED2,WDR72
gene_set_query	1326	ZNF670	0.543	ARCHS4 Coexpression,0.543	GSTP1,BCAT1
gene_set_query	1327	ZSCAN26	0.5436	ARCHS4 Coexpression,0.5436	ASCL2,CD200
gene_set_query	1328	SP4	0.5442	ARCHS4 Coexpression,0.5442	TPM4,MYOF
gene_set_query	1329	ZNF880	0.5445	GTEx Coexpression,0.5445	ARSJ,RAB34
gene_set_query	1330	ZNF124	0.5463	Enrichr Queries,0.5463	SP100,ANXA1,PIK3R1,PTGS2,ETS1,SORL1,CXCL10,CDK6,BCAT1,PHLDA1,CTSC,CD44
gene_set_query	1331	ZNF264	0.547	Enrichr Queries,0.547	DUSP5,PIK3R1,AHR,NR3C1,ETS1,IFIT3,APOL6,CCND2,CDK6,IGF2BP1,KCTD12,CD44
gene_set_query	1332	ZNF793	0.5477	Enrichr Queries,0.5477	MX1,ANO5,HDAC9,SORL1,IFIT3,IFI44L,CXCL10,CCND2,OAS2,IGF2BP1,XAF1,GBP4
gene_set_query	1333	THAP8	0.5482	GTEx Coexpression,0.5482	GJC1,UBXN10
gene_set_query	1334	BHLHA15	0.5485	ARCHS4 Coexpression,0.5485	MAGEA1,GPRC5D
gene_set_query	1335	KCNIP3	0.5488	GTEx Coexpression,0.5488	GABRA3,RORB
gene_set_query	1336	HOMEZ	0.5491	Enrichr Queries,0.5491	DUSP5,TINAGL1,PIK3R1,AHR,NR3C1,ETS1,IFIT3,IFIT2,BMP4,CCND2,PHLDA1,CD44
gene_set_query	1337	MAZ	0.5508	ENCODE ChIP-seq,0.5508	IFITM3,NQO1,SP100,GINS4,IFIT5,IL18,EMP1,MITF,PTGS2,TM4SF1,BMP6,ANO3,OASL,BST2,PTPRE,APOL6,OAF,PRAME,S100P,SP140L,SNX5,CTSC,SLC16A5
gene_set_query	1338	ZNF202	0.5516	ARCHS4 Coexpression,0.5516	IGF2BP1,IGF2BP3
gene_set_query	1339	ZNF624	0.5526	GTEx Coexpression,0.5526	IGF2BP1,IGF2BP3
gene_set_query	1340	ZIC4	0.5528	ARCHS4 Coexpression,0.5528	PRDM16,AGPAT4
gene_set_query	1341	ZNF764	0.5534	ARCHS4 Coexpression,0.5534	TPM4,MYOF
gene_set_query	1342	MYRF	0.5538	GTEx Coexpression,0.5538	ENPP2,AGPAT4
gene_set_query	1343	ZBTB6	0.5547	ARCHS4 Coexpression,0.5547	MDFIC,ETS1
gene_set_query	1344	TOPORS	0.5551	GTEx Coexpression,0.5551	SPESP1,IGF2BP1
gene_set_query	1345	ZNF771	0.5553	ARCHS4 Coexpression,0.5553	PYCARD,MSN
gene_set_query	1346	ZNF677	0.5563	GTEx Coexpression,0.5563	CRISP2,SPESP1
gene_set_query	1347	ZNF174	0.5577	ARCHS4 Coexpression,0.5577	ANO5,SSX1
gene_set_query	1348	ZBTB8A	0.5582	GTEx Coexpression,0.5582	TACC1,PIK3R1
gene_set_query	1349	PROP1	0.5584	Enrichr Queries,0.5584	CXCL10,TINAGL1,PAX3,CCL2,PPARG,PTGS2,PITX2,TBX5,ASCL2,S100A9,MATN2
gene_set_query	1350	ZNF830	0.56	GTEx Coexpression,0.56	GIMAP2,SP140L
gene_set_query	1351	MNX1	0.5605	Enrichr Queries,0.5605	CXCL10,TINAGL1,COL2A1,CCND2,PRDM16,PAX3,PPARG,PTGS2,PITX2,ASCL2,BMP7
gene_set_query	1352	ZNF233	0.5607	GTEx Coexpression,0.5607	SPESP1,GTSF1
gene_set_query	1353	DMBX1	0.5613	Enrichr Queries,0.5613	CXCL10,IFITM1,TINAGL1,COL2A1,OLFML3,LAMA1,PRDM16,PAX3,PITX2,BMP7,ASS1
gene_set_query	1354	NKX62	0.5613	GTEx Coexpression,0.5613	ENPP2,AGPAT4
gene_set_query	1355	ZNF48	0.5644	GTEx Coexpression,0.5644	LPAR6,SLITRK3
gene_set_query	1356	HMG20B	0.5657	ARCHS4 Coexpression,0.5657	TYRP1,MITF
gene_set_query	1357	THAP4	0.5675	GTEx Coexpression,0.5675	CKMT2,ANO5
gene_set_query	1358	LHX3	0.5676	ARCHS4 Coexpression,0.5676	CNGB3,KRT20
gene_set_query	1359	ZNF337	0.5682	ARCHS4 Coexpression,0.5682	CCND2,PTPRO
gene_set_query	1360	ZNF512B	0.5694	GTEx Coexpression,0.5694	MPPED2,WDR72
gene_set_query	1361	SON	0.5694	ARCHS4 Coexpression,0.5694	TACC1,DSCR8
gene_set_query	1362	ZNF668	0.5713	GTEx Coexpression,0.5713	PYCARD,RAC2
gene_set_query	1363	ZNF805	0.5713	ARCHS4 Coexpression,0.5713	AHR,NR3C1
gene_set_query	1364	ZNF585A	0.5719	Enrichr Queries,0.5719	DUSP5,SLFN5,SAMD9L,ANXA1,CDK6,PIK3R1,IFIT1,NR3C1,HDAC9,IFIT3,CD44
gene_set_query	1365	HES5	0.5737	GTEx Coexpression,0.5737	CSMD3,BMP7
gene_set_query	1366	RFX3	0.5756	ARCHS4 Coexpression,0.5756	CHST9,UBXN10
gene_set_query	1367	ZNF623	0.5762	ARCHS4 Coexpression,0.5762	GJC1,ZYG11A
gene_set_query	1368	ZNF628	0.5762	GTEx Coexpression,0.5762	CRISP2,GTSF1
gene_set_query	1369	ZFP2	0.5769	Enrichr Queries,0.5769	BMP4,CXCL10,SFRP1,TINAGL1,OLFML3,MPPED2,ENPP2,EMP1,PIK3R1,NCALD,IFIT2
gene_set_query	1370	REPIN1	0.5775	GTEx Coexpression,0.5775	PLS3,ANO5
gene_set_query	1371	BPTF	0.578	ARCHS4 Coexpression,0.578	GJC1,IGF2BP1
gene_set_query	1372	ZNF3	0.5787	GTEx Coexpression,0.5787	FAM133A,DKK3
gene_set_query	1373	ZNF629	0.5791	Enrichr Queries,0.5791	CXCL10,CCND2,CDK6,MYOF,CHST15,IFI6,PIK3R1,NR3C1,BCAT1,SORL1,ASS1
gene_set_query	1374	FOXE3	0.5817	ARCHS4 Coexpression,0.5817	SLFN11,PLS3
gene_set_query	1375	FOXO6	0.5818	GTEx Coexpression,0.5818	ARMCX2,MPPED2
gene_set_query	1376	LCOR	0.5856	GTEx Coexpression,0.5856	GALNT12,UGT2A3
gene_set_query	1377	ZNF585B	0.5862	GTEx Coexpression,0.5862	ARMCX2,MPPED2
gene_set_query	1378	POU6F1	0.5905	Enrichr Queries,0.5905	CXCL10,TINAGL1,CCND2,ITPR1,MITF,KCTD12,PIK3R1,ETS1,SORL1,IFIT3,TGM2
gene_set_query	1379	ZNF79	0.5919	Enrichr Queries,0.5919	APOBEC3C,DUSP5,CXCL10,CDK6,PSTPIP2,INPP5D,FHL2,PARP14,CD44,ICAM1,CES1
gene_set_query	1380	ADNP	0.5926	ReMap ChIP-seq,0.5926	BST2,APOL6,KRT15,OAS3,ITPR1,TNS4,JAK3,ICAM1,IL27RA,HLA-E,TGM2
gene_set_query	1381	HSF4	0.594	Enrichr Queries,0.594	IFITM3,LGALS3,DUSP5,CXCL10,TINAGL1,GPNMB,PPARG,ISG15,IFIT3,CD44,ICAM1
gene_set_query	1382	GTF2IRD2B	0.5949	GTEx Coexpression,0.5949	FHL1,MITF
gene_set_query	1383	TFCP2	0.5952	ARCHS4 Coexpression,0.5952	IGF2BP1,IGF2BP3
gene_set_query	1384	KLF16	0.5955	GTEx Coexpression,0.5955	RASGEF1A,ANO3
gene_set_query	1385	ZNF100	0.5961	GTEx Coexpression,0.5961	HVCN1,ZNF257
gene_set_query	1386	ZNF681	0.5962	Enrichr Queries,0.5962	CXCL10,CCND2,CDK6,SAMD9,IGF2BP3,PIK3R1,ZNF257,HDAC9,SORL1,CD200,GBP3
gene_set_query	1387	ZNF17	0.5968	GTEx Coexpression,0.5968	MITF,NR3C1
gene_set_query	1388	ZNF774	0.5969	Enrichr Queries,0.5969	DUSP5,SLFN5,ITGA2,IFI6,FHL2,PIK3R1,PTGS2,SORL1,NKD1,IFI44L,MATN2
gene_set_query	1389	GPBP1L1	0.5977	ARCHS4 Coexpression,0.5977	MSN,IKZF1
gene_set_query	1390	ZSCAN20	0.598	GTEx Coexpression,0.598	ARSJ,IGF2BP3
gene_set_query	1391	ZNF2	0.5983	Enrichr Queries,0.5983	TINAGL1,CCND2,CDK6,HFE,FHL2,SPATS2L,PIK3R1,NR3C1,ETS1,PHLDA1,IFIT2
gene_set_query	1392	SNAPC2	0.5986	GTEx Coexpression,0.5986	GJC1,RAB34
gene_set_query	1393	NKX11	0.5993	GTEx Coexpression,0.5993	GTSF1,DSCR8
gene_set_query	1394	CHAMP1	0.5995	ARCHS4 Coexpression,0.5995	IGF2BP1,IGF2BP3
gene_set_query	1395	HMGN3	0.6001	ARCHS4 Coexpression,0.6001	GSTP1,MSN
gene_set_query	1396	ZNF773	0.6004	Enrichr Queries,0.6004	DUSP5,SLFN5,ERAP2,AHR,IFIT1,XAF1,PHLDA1,IFIT3,IFI44L,IFIT2,ICAM1
gene_set_query	1397	FAM200B	0.603	GTEx Coexpression,0.603	RASGEF1A,CSMD3
gene_set_query	1398	ZKSCAN8	0.605	ARCHS4 Coexpression,0.605	SAGE1,PRAME
gene_set_query	1399	ZNF594	0.6054	Enrichr Queries,0.6054	DUSP5,CXCL10,SLFN5,SAMD9L,SAMD9,IFIT1,XAF1,SORL1,IFIT3,IFI44L,IFIT2
gene_set_query	1400	ALX3	0.6083	Enrichr Queries,0.6083	BMP4,CXCL10,TINAGL1,COL2A1,PRDM16,PAX3,PITX2,ASCL2,BMP7,BMP6
gene_set_query	1401	ZBTB44	0.6086	GTEx Coexpression,0.6086	CLIP4,SMTNL2
gene_set_query	1402	ATF1	0.6102	ENCODE ChIP-seq,0.6102	APOBEC3C,SRGN,DUSP5,IFITM1,IFITM2,MAGEA12,SAMD9,GINS4,GIMAP2,LY96,CSAG1,VAV1,HLA-E,AGPAT4,CCND2,IFI27,SAGE1,ARHGDIB,ELMO1,SOSTDC1,PRAME,ZNF257
gene_set_query	1403	ZNF609	0.6117	GTEx Coexpression,0.6117	DNAH8,DDX43
gene_set_query	1404	MESP2	0.6129	GTEx Coexpression,0.6129	KRT222,GABRA3
gene_set_query	1405	CXXC5	0.613	ARCHS4 Coexpression,0.613	BMP7
gene_set_query	1406	ZNF573	0.6132	Enrichr Queries,0.6132	DUSP5,CXCL10,IFI16,FHL2,IFIT1,DDX60,XAF1,ETS1,PHLDA1,CD44
gene_set_query	1407	ZNF526	0.6149	ARCHS4 Coexpression,0.6149	ZYG11A
gene_set_query	1408	ERF	0.6154	GTEx Coexpression,0.6154	MSN,FXYD5
gene_set_query	1409	ZNF428	0.6161	ARCHS4 Coexpression,0.6161	NCALD
gene_set_query	1410	RAX2	0.6161	Enrichr Queries,0.6161	TINAGL1,ERAP2,IL18,IFI6,S100A6,TACSTD2,DAPP1,SEMA3E,AHR,PTGS2
gene_set_query	1411	ASCL5	0.6167	GTEx Coexpression,0.6167	CLDN10,BCAT1
gene_set_query	1412	ASH1L	0.6173	GTEx Coexpression,0.6173	PIK3R1,PSMB8
gene_set_query	1413	ZNF879	0.6186	ARCHS4 Coexpression,0.6186	MKRN3
gene_set_query	1414	HSFX1	0.6192	GTEx Coexpression,0.6192	CKMT2,ANO5
gene_set_query	1415	ZNF195	0.6204	ARCHS4 Coexpression,0.6204	MSN
gene_set_query	1416	ZNF569	0.6211	Enrichr Queries,0.6211	DUSP5,TINAGL1,ANXA1,SERTAD4,CDK6,ITPR1,IFI44,IGF2BP3,PHLDA1,HDAC9
gene_set_query	1417	ZKSCAN3	0.6223	GTEx Coexpression,0.6223	HFE,CSMD3
gene_set_query	1418	SREBF2	0.6229	GTEx Coexpression,0.6229	KRT222,VSNL1
gene_set_query	1419	ZNF527	0.6246	Enrichr Queries,0.6246	CXCL10,TINAGL1,APOL6,CDK6,PLEKHA2,LAMP3,ITPR1,NR3C1,HDAC9,GBP4
gene_set_query	1420	MBD3	0.6263	ReMap ChIP-seq,0.6263	KRT15,RAB34,IGF2BP1,ZNF469,KLK10,BMP7,KLK11,THSD4,ASS1,ICAM1
gene_set_query	1421	ZNF131	0.6278	ARCHS4 Coexpression,0.6278	GINS4
gene_set_query	1422	CHCHD3	0.6291	GTEx Coexpression,0.6291	CKMT2,ANO5
gene_set_query	1423	ZNF669	0.6296	Enrichr Queries,0.6296	DUSP5,ERAP2,IFI6,DAPP1,SEMA3E,AHR,PTGS2,PHLDA1,IFIT3,IFIT2
gene_set_query	1424	ZNF705E	0.631	GTEx Coexpression,0.631	CLDN1,XG
gene_set_query	1425	ZFP62	0.6314	ARCHS4 Coexpression,0.6314	CCND2
gene_set_query	1426	E2F8	0.6316	GTEx Coexpression,0.6316	SMTNL2,ANO5
gene_set_query	1427	ZNF148	0.6327	ARCHS4 Coexpression,0.6327	IFIT1
gene_set_query	1428	ZNF213	0.6335	GTEx Coexpression,0.6335	GTSF1,DSCR8
gene_set_query	1429	DPF1	0.6347	GTEx Coexpression,0.6347	KRT222,GABRA3
gene_set_query	1430	ZFX	0.6353	GTEx Coexpression,0.6353	MITF,XIST
gene_set_query	1431	NACC2	0.6357	ARCHS4 Coexpression,0.6357	DKK3
gene_set_query	1432	ZBTB18	0.6364	ARCHS4 Coexpression,0.6364	VSNL1
gene_set_query	1433	ZNF766	0.6366	GTEx Coexpression,0.6366	DNAH8,GTSF1
gene_set_query	1434	ZNF605	0.6368	Enrichr Queries,0.6368	CXCL10,SLFN5,SERTAD4,CCND2,CDK6,SAMD9,IFI44,XAF1,BCAT1,IFIT3
gene_set_query	1435	CIC	0.6372	GTEx Coexpression,0.6372	PRAME,MAGEA4
gene_set_query	1436	ZKSCAN5	0.6382	ARCHS4 Coexpression,0.6382	GJC1
gene_set_query	1437	ZNF772	0.64	ARCHS4 Coexpression,0.64	MSN
gene_set_query	1438	ZFP41	0.6403	GTEx Coexpression,0.6403	SP100,GABRA3
gene_set_query	1439	NR2C1	0.6407	ARCHS4 Coexpression,0.6407	MSN
gene_set_query	1440	ZNF706	0.6409	GTEx Coexpression,0.6409	CLDN10,CLDN1
gene_set_query	1441	ZSCAN12	0.6425	ARCHS4 Coexpression,0.6425	CD200
gene_set_query	1442	ZNF852	0.6441	GTEx Coexpression,0.6441	CD40,SP100
gene_set_query	1443	ZNF518A	0.645	ARCHS4 Coexpression,0.645	ANO5
gene_set_query	1444	ZNF500	0.6456	ARCHS4 Coexpression,0.6456	ZYG11A
gene_set_query	1445	ZNF821	0.6459	GTEx Coexpression,0.6459	GTSF1,DSCR8
gene_set_query	1446	PURG	0.6468	ARCHS4 Coexpression,0.6468	AGPAT4
gene_set_query	1447	ZNF333	0.6474	Enrichr Queries,0.6474	LGALS3,CXCL10,SLFN5,SP100,ITPR1,TACC1,AHR,NR3C1,CD44,ICAM1
gene_set_query	1448	ZNF517	0.6486	ARCHS4 Coexpression,0.6486	TPM4
gene_set_query	1449	ZNF540	0.6489	Enrichr Queries,0.6489	CXCL10,GPNMB,GPX3,EPB41L3,IFI6,ITPR1,PIK3R1,SORL1,IFI44L,NCALD
gene_set_query	1450	ZNF749	0.6493	ARCHS4 Coexpression,0.6493	GSTP1
gene_set_query	1451	CENPBD1	0.6499	ARCHS4 Coexpression,0.6499	MSN
gene_set_query	1452	ZFP1	0.6505	ARCHS4 Coexpression,0.6505	RGS13
gene_set_query	1453	ZNF444	0.6509	GTEx Coexpression,0.6509	CLEC2B,IFI16
gene_set_query	1454	ZNF519	0.6511	ARCHS4 Coexpression,0.6511	KYNU
gene_set_query	1455	ZNF555	0.6524	Enrichr Queries,0.6524	CDK6,MX1,KCTD12,PIK3R1,AHR,IFIT1,BCAT1,HDAC9,IFIT3,IFIT2
gene_set_query	1456	TFDP1	0.6528	GTEx Coexpression,0.6528	GINS4,IGF2BP3
gene_set_query	1457	ZNF780B	0.6529	ARCHS4 Coexpression,0.6529	CSMD3
gene_set_query	1458	EVX2	0.6548	ARCHS4 Coexpression,0.6548	TMPRSS4
gene_set_query	1459	HMX1	0.6567	Enrichr Queries,0.6567	CXCL10,TINAGL1,COL2A1,PRDM16,PAX3,PPARG,PITX2,TBX5,BMP7
gene_set_query	1460	FOXD4L3	0.6571	GTEx Coexpression,0.6571	KRT222,RASGEF1A
gene_set_query	1461	MTERF3	0.6577	GTEx Coexpression,0.6577	CKMT2,ANO5
gene_set_query	1462	UNCX	0.6579	ARCHS4 Coexpression,0.6579	AGPAT4
gene_set_query	1463	PRMT3	0.6585	ARCHS4 Coexpression,0.6585	SNX5
gene_set_query	1464	KIN	0.6602	GTEx Coexpression,0.6602	ARHGDIB,LY96
gene_set_query	1465	ZNF525	0.6603	ARCHS4 Coexpression,0.6603	SPESP1
gene_set_query	1466	ZNF343	0.6609	GTEx Coexpression,0.6609	RAB34,CSMD3
gene_set_query	1467	ZNF865	0.6615	GTEx Coexpression,0.6615	SMTNL2,ANO5
gene_set_query	1468	ZNF550	0.6615	ARCHS4 Coexpression,0.6615	CCND2
gene_set_query	1469	ZNF282	0.6627	GTEx Coexpression,0.6627	PYCARD,ASCL2
gene_set_query	1470	TIGD7	0.6631	Enrichr Queries,0.6631	DUSP5,CDK6,SH3KBP1,CHST15,PHLDA1,HDAC9,SORL1,PAPSS2,IFIT2
gene_set_query	1471	LHX1	0.6645	Enrichr Queries,0.6645	DUSP5,SFRP1,TINAGL1,CCND2,PRDM16,PAX3,PITX2,PHLDA1,BMP7
gene_set_query	1472	ZIM2	0.6646	GTEx Coexpression,0.6646	CRISP2
gene_set_query	1473	SAFB2	0.6652	ARCHS4 Coexpression,0.6652	INPP5D
gene_set_query	1474	CENPB	0.6658	GTEx Coexpression,0.6658	CSAG1
gene_set_query	1475	LHX5	0.666	Enrichr Queries,0.666	SFRP1,TINAGL1,COL2A1,PRDM16,IGF2BP1,PAX3,FZD10,PITX2,BMP7
gene_set_query	1476	ZNF587	0.6677	ARCHS4 Coexpression,0.6677	GJC1
gene_set_query	1477	SOX12	0.6683	GTEx Coexpression,0.6683	ARMCX2
gene_set_query	1478	ZNF358	0.6696	GTEx Coexpression,0.6696	DENND2D
gene_set_query	1479	ZNF547	0.6708	ARCHS4 Coexpression,0.6708	MSN
gene_set_query	1480	FIZ1	0.6714	GTEx Coexpression,0.6714	AHR
gene_set_query	1481	ZNF268	0.6717	Enrichr Queries,0.6717	DUSP5,CXCL10,ANXA1,SERTAD4,CDK6,SAMD9,GPNMB,PIK3R1,NR3C1
gene_set_query	1482	SIX5	0.6766	Enrichr Queries,0.6766	IFITM3,LGALS3,DUSP5,MMP14,TINAGL1,CCND2,GPNMB,PHLDA1,TGM2
gene_set_query	1483	L3MBTL1	0.6781	ARCHS4 Coexpression,0.6781	SLITRK3
gene_set_query	1484	THRA	0.6783	GTEx Coexpression,0.6783	CSMD3
gene_set_query	1485	ZNF414	0.6795	GTEx Coexpression,0.6795	ASCL2
gene_set_query	1486	ZNF507	0.68	ARCHS4 Coexpression,0.68	IGF2BP1
gene_set_query	1487	ATMIN	0.6812	ARCHS4 Coexpression,0.6812	ARHGDIB
gene_set_query	1488	POGK	0.6816	Enrichr Queries,0.6816	DUSP5,CCND2,CDK6,TPM4,PIK3R1,BCAT1,ETS1,PHLDA1,CD44
gene_set_query	1489	ZNF835	0.683	Enrichr Queries,0.683	CXCL10,SFRP1,TINAGL1,BHMT2,MACC1,NLRP2,WDR72,SORL1,CD200
gene_set_query	1490	POU3F3	0.6837	ARCHS4 Coexpression,0.6837	AGPAT4
gene_set_query	1491	TTF1	0.6843	ARCHS4 Coexpression,0.6843	GINS4
gene_set_query	1492	ZNF660	0.6845	Enrichr Queries,0.6845	CXCL10,TINAGL1,CCND2,MPPED2,ENPP2,HDAC9,CD200,CD44,FBN1
gene_set_query	1493	MYSM1	0.6849	ARCHS4 Coexpression,0.6849	IGF2BP1
gene_set_query	1494	INSM1	0.6859	Enrichr Queries,0.6859	CXCL10,COL2A1,CCND2,ENPP2,KCTD12,PITX2,BMP7,CD200,CD44
gene_set_query	1495	REXO4	0.6864	GTEx Coexpression,0.6864	SMTNL2
gene_set_query	1496	ZNF140	0.6866	Enrichr Queries,0.6866	DUSP5,CXCL10,CCND2,CDK6,IFI6,PIK3R1,IFIT1,PTGS2,CD44
gene_set_query	1497	ZNF599	0.6882	GTEx Coexpression,0.6882	SPESP1
gene_set_query	1498	ZBTB9	0.6904	ARCHS4 Coexpression,0.6904	IGF2BP1
gene_set_query	1499	MGA	0.6907	GTEx Coexpression,0.6907	PRAME
gene_set_query	1500	ZNF789	0.691	ARCHS4 Coexpression,0.691	ZYG11A
gene_set_query	1501	ZNF513	0.6932	GTEx Coexpression,0.6932	ARMCX1
gene_set_query	1502	ZNF250	0.6941	ARCHS4 Coexpression,0.6941	MPPED2
gene_set_query	1503	SNAPC5	0.6957	GTEx Coexpression,0.6957	ANO5
gene_set_query	1504	ZNF8	0.6966	ARCHS4 Coexpression,0.6966	GJC1
gene_set_query	1505	ARHGAP35	0.697	GTEx Coexpression,0.697	CRISP2
gene_set_query	1506	ZNF664	0.6982	GTEx Coexpression,0.6982	AGPAT4
gene_set_query	1507	ZNF692	0.6984	ARCHS4 Coexpression,0.6984	PRAME
gene_set_query	1508	ZNF768	0.6994	GTEx Coexpression,0.6994	ANO5
gene_set_query	1509	MECP2	0.7001	Enrichr Queries,0.7001	CCND2,CDK6,SH3KBP1,ITPR1,MSN,PIK3R1,NR3C1,ETS1,CD44
gene_set_query	1510	MYPOP	0.7007	GTEx Coexpression,0.7007	RASGEF1A
gene_set_query	1511	ZFPM1	0.7023	Enrichr Queries,0.7023	IFITM3,DUSP5,TINAGL1,CCND2,PRDM16,PIK3R1,ETS1,PHLDA1,ASS1
gene_set_query	1512	FOXK2	0.7038	GTEx Coexpression,0.7038	SMTNL2
gene_set_query	1513	FOXD4L4	0.7057	GTEx Coexpression,0.7057	PPARG
gene_set_query	1514	BARHL2	0.7058	Enrichr Queries,0.7058	TINAGL1,PRDM16,PAX3,FZD10,RORB,PITX2,TBX5,BMP7
gene_set_query	1515	ZBTB45	0.7082	GTEx Coexpression,0.7082	PYCARD
gene_set_query	1516	ZSCAN1	0.7107	ARCHS4 Coexpression,0.7107	MSN
gene_set_query	1517	PREB	0.7113	ARCHS4 Coexpression,0.7113	DNAH8
gene_set_query	1518	FOXD4L6	0.7115	Enrichr Queries,0.7115	CXCL10,PRDM16,ELMO1,WDR72,FZD10,RORB,PITX2,TLR4
gene_set_query	1519	MTERF1	0.715	GTEx Coexpression,0.715	IGF2BP3
gene_set_query	1520	ZNF320	0.7156	GTEx Coexpression,0.7156	ARMCX2
gene_set_query	1521	PURB	0.7174	ARCHS4 Coexpression,0.7174	MYOF
gene_set_query	1522	RFX1	0.7175	GTEx Coexpression,0.7175	GTSF1
gene_set_query	1523	GZF1	0.7181	GTEx Coexpression,0.7181	TMEM71
gene_set_query	1524	ZNF791	0.7187	Enrichr Queries,0.7187	DUSP5,SLFN5,ANXA1,PIK3R1,AHR,PTGS2,PHLDA1,CD44
gene_set_query	1525	ZNF576	0.7194	GTEx Coexpression,0.7194	KRT222
gene_set_query	1526	ZNF16	0.7194	Enrichr Queries,0.7194	BCHE,CDK6,PIK3R1,NR3C1,ETS1,PHLDA1,SORL1,ASS1
gene_set_query	1527	ZBTB42	0.7211	ARCHS4 Coexpression,0.7211	TMPRSS13
gene_set_query	1528	TLX3	0.7224	ARCHS4 Coexpression,0.7224	LY6K
gene_set_query	1529	THAP7	0.723	ARCHS4 Coexpression,0.723	PRAME
gene_set_query	1530	NKX31	0.7236	ARCHS4 Coexpression,0.7236	MAGEA2B
gene_set_query	1531	ZNF461	0.7236	Enrichr Queries,0.7236	CXCL10,SLFN5,IFI44,IFIT1,PTGS2,NR3C1,HDAC9,IFIT3
gene_set_query	1532	ZSCAN22	0.7244	Enrichr Queries,0.7244	DUSP5,TINAGL1,CCND2,CDK6,PIK3R1,FXYD5,BCAT1,ETS1
gene_set_query	1533	ZNF837	0.7262	GTEx Coexpression,0.7262	WDR72
gene_set_query	1534	ZNF568	0.7272	Enrichr Queries,0.7272	CXCL10,SLFN5,CDK6,ITPR1,PIK3R1,NR3C1,HDAC9,FBN1
gene_set_query	1535	ZFHX2	0.7273	ARCHS4 Coexpression,0.7273	AGPAT4
gene_set_query	1536	ZNF345	0.7293	Enrichr Queries,0.7293	CXCL10,SLFN5,APOL6,SAMD9,PIK3R1,IFIT1,DDX60,IFIT2
gene_set_query	1537	ZKSCAN7	0.7316	ARCHS4 Coexpression,0.7316	SLITRK3
gene_set_query	1538	ZNF34	0.7353	ARCHS4 Coexpression,0.7353	TPM4
gene_set_query	1539	ZBTB8B	0.7362	GTEx Coexpression,0.7362	CSMD3
gene_set_query	1540	ZNF408	0.7371	ARCHS4 Coexpression,0.7371	PYCARD
gene_set_query	1541	PHF20	0.738	GTEx Coexpression,0.738	SMTNL2
gene_set_query	1542	RBSN	0.7408	ARCHS4 Coexpression,0.7408	MSN
gene_set_query	1543	ZNF70	0.745	Enrichr Queries,0.745	CXCL10,SLFN5,CCND2,CDK6,OAS3,ITPR1,PHLDA1,MATN2
gene_set_query	1544	NHLH2	0.7469	ARCHS4 Coexpression,0.7469	PTPRO
gene_set_query	1545	VSX1	0.7482	ARCHS4 Coexpression,0.7482	FAM9B
gene_set_query	1546	PIN1	0.7498	GTEx Coexpression,0.7498	KRT222
gene_set_query	1547	ZNF557	0.7514	Enrichr Queries,0.7514	DUSP5,APOL6,CCND2,CDK6,AHR,NR3C1,PHLDA1,CD44
gene_set_query	1548	LCORL	0.753	GTEx Coexpression,0.753	GINS4
gene_set_query	1549	FOXK1	0.755	Enrichr Queries,0.755	CCND2,CDK6,ANXA2,TACC1,PIK3R1,NR3C1,ETS1,CD44
gene_set_query	1550	ZNF875	0.7557	Enrichr Queries,0.7557	LGALS3,COL2A1,CCND2,GPNMB,IFI16,ITPR1,IGF2BP3,CD44
gene_set_query	1551	THYN1	0.7586	GTEx Coexpression,0.7586	KRT222
gene_set_query	1552	CAMTA2	0.7598	GTEx Coexpression,0.7598	KRT222
gene_set_query	1553	ZNF777	0.7604	GTEx Coexpression,0.7604	ALG1L
gene_set_query	1554	HSFY2	0.7623	GTEx Coexpression,0.7623	KRT222
gene_set_query	1555	CSRNP2	0.7629	GTEx Coexpression,0.7629	FAM133A
gene_set_query	1556	ZBED4	0.7642	GTEx Coexpression,0.7642	MACC1
gene_set_query	1557	ZNF511	0.7654	ARCHS4 Coexpression,0.7654	GSTP1
gene_set_query	1558	BAZ2B	0.7666	ARCHS4 Coexpression,0.7666	MPPED2
gene_set_query	1559	DEAF1	0.7666	GTEx Coexpression,0.7666	CSMD3
gene_set_query	1560	ZNF567	0.7692	Enrichr Queries,0.7692	DUSP5,SAMD9L,CDK6,SAMD9,PIK3R1,IFIT1,IFIT3
gene_set_query	1561	CCDC169SOHLH2	0.7697	ARCHS4 Coexpression,0.7697	TMPRSS4
gene_set_query	1562	ZNF688	0.7709	ARCHS4 Coexpression,0.7709	SP100
gene_set_query	1563	PA2G4	0.7715	ARCHS4 Coexpression,0.7715	MAGEA3
gene_set_query	1564	NEUROD2	0.7733	ARCHS4 Coexpression,0.7733	MACC1
gene_set_query	1565	CENPX	0.7735	GTEx Coexpression,0.7735	GALNT12
gene_set_query	1566	SAFB	0.7758	ARCHS4 Coexpression,0.7758
gene_set_query	1567	ZNF776	0.777	ARCHS4 Coexpression,0.777
gene_set_query	1568	FBXL19	0.7797	GTEx Coexpression,0.7797	FAM133A
gene_set_query	1569	ZNF497	0.7807	ARCHS4 Coexpression,0.7807
gene_set_query	1570	ZNF324	0.781	GTEx Coexpression,0.781	TMEM154
gene_set_query	1571	ZNF7	0.7821	Enrichr Queries,0.7821	IFITM3,TINAGL1,CDK6,ITPR1,TACC1,PHLDA1,MATN2
gene_set_query	1572	BAZ2A	0.7838	ARCHS4 Coexpression,0.7838
gene_set_query	1573	RLF	0.7841	GTEx Coexpression,0.7841	CLEC2B
gene_set_query	1574	THAP6	0.7842	Enrichr Queries,0.7842	DUSP5,ANXA1,CDK6,PIK3R1,NR3C1,ETS1,CD44
gene_set_query	1575	SRCAP	0.7899	ARCHS4 Coexpression,0.7899
gene_set_query	1576	ZNF324B	0.7912	ARCHS4 Coexpression,0.7912
gene_set_query	1577	PCGF6	0.7922	GTEx Coexpression,0.7922	MITF
gene_set_query	1578	ZNF44	0.7927	Enrichr Queries,0.7927	SLFN5,ANXA1,MYOF,ITPR1,NR3C1,XAF1,IFIT3
gene_set_query	1579	ZNF417	0.7955	ARCHS4 Coexpression,0.7955
gene_set_query	1580	AKAP8L	0.797	Enrichr Queries,0.797	TINAGL1,ANXA2,FHL2,NR3C1,S100A9,CD44,ICAM1
gene_set_query	1581	JRK	0.7979	ARCHS4 Coexpression,0.7979
gene_set_query	1582	ZBED5	0.7991	ARCHS4 Coexpression,0.7991
gene_set_query	1583	ZNF709	0.8027	Enrichr Queries,0.8027	CXCL10,TINAGL1,CCND2,ST3GAL6,IGF2BP3,PIK3R1,SORL1
gene_set_query	1584	MYT1L	0.8028	ARCHS4 Coexpression,0.8028
gene_set_query	1585	CREBZF	0.8034	ARCHS4 Coexpression,0.8034
gene_set_query	1586	ZNF232	0.8046	GTEx Coexpression,0.8046	MITF
gene_set_query	1587	NR2C2	0.8053	ARCHS4 Coexpression,0.8053
gene_set_query	1588	ZNF142	0.8065	GTEx Coexpression,0.8065	ITPR1
gene_set_query	1589	THAP3	0.809	ARCHS4 Coexpression,0.809
gene_set_query	1590	ZNF446	0.8133	ARCHS4 Coexpression,0.8133
gene_set_query	1591	GTF2I	0.8139	ARCHS4 Coexpression,0.8139
gene_set_query	1592	ZNF543	0.8152	GTEx Coexpression,0.8152
gene_set_query	1593	THAP1	0.8212	Enrichr Queries,0.8212	CDK6,PIK3R1,PTGS2,NR3C1,ETS1,PHLDA1
gene_set_query	1594	KMT2B	0.8215	ReMap ChIP-seq,0.8215	DENND2D,IL4R,ITPR1,ETS1,ICAM1,TMEM154
gene_set_query	1595	ZNF180	0.8219	Enrichr Queries,0.8219	CXCL10,CCND2,ITPR1,PIK3R1,NR3C1,PHLDA1
gene_set_query	1596	ZNF510	0.8225	ARCHS4 Coexpression,0.8225
gene_set_query	1597	MZF1	0.8234	Enrichr Queries,0.8234	DUSP5,TINAGL1,PPARG,AHR,NR3C1,ETS1
gene_set_query	1598	ZNF785	0.8245	GTEx Coexpression,0.8245
gene_set_query	1599	MYNN	0.8249	ReMap ChIP-seq,0.8249	PYCARD,GSTP1,RAB34,ISG15,IFI35,ICAM1
gene_set_query	1600	RBAK	0.8307	GTEx Coexpression,0.8307
gene_set_query	1601	MYT1	0.8345	GTEx Coexpression,0.8345
gene_set_query	1602	ZNF630	0.8378	ARCHS4 Coexpression,0.8378
gene_set_query	1603	HSFX2	0.8391	ARCHS4 Coexpression,0.8391
gene_set_query	1604	ZNF285	0.8419	GTEx Coexpression,0.8419
gene_set_query	1605	SCRT2	0.8451	GTEx Coexpression,0.8451
gene_set_query	1606	ZNF529	0.8483	Enrichr Queries,0.8483	CCND2,CDK6,BCAT1,ETS1,HDAC9,CD44
gene_set_query	1607	E4F1	0.8563	ARCHS4 Coexpression,0.8563
gene_set_query	1608	BARHL1	0.8611	Enrichr Queries,0.8611	TINAGL1,PRDM16,PAX3,PITX2,BMP7
gene_set_query	1609	GLYR1	0.8649	ARCHS4 Coexpression,0.8649
gene_set_query	1610	ZNF653	0.8662	GTEx Coexpression,0.8662
gene_set_query	1611	TIGD5	0.8667	ARCHS4 Coexpression,0.8667
gene_set_query	1612	ZNF765	0.8692	ARCHS4 Coexpression,0.8692
gene_set_query	1613	SPEN	0.8735	ARCHS4 Coexpression,0.8735
gene_set_query	1614	SCX	0.879	ARCHS4 Coexpression,0.879
gene_set_query	1615	ZNF844	0.8818	GTEx Coexpression,0.8818
gene_set_query	1616	ZNF891	0.8899	GTEx Coexpression,0.8899
gene_set_query	1617	SGSM2	0.8911	GTEx Coexpression,0.8911
gene_set_query	1618	CARF	0.8925	ARCHS4 Coexpression,0.8925
gene_set_query	1619	PRR12	0.8962	ARCHS4 Coexpression,0.8962
gene_set_query	1620	ZNF12	0.9031	Enrichr Queries,0.9031	CDK6,PIK3R1,NR3C1,SORL1
gene_set_query	1621	ZNF530	0.9054	GTEx Coexpression,0.9054
gene_set_query	1622	ZNF451	0.911	Enrichr Queries,0.911	CDK6,PIK3R1,NR3C1,CD44
gene_set_query	1623	ZBTB26	0.9115	ARCHS4 Coexpression,0.9115
gene_set_query	1624	ZNF397	0.9122	ARCHS4 Coexpression,0.9122
gene_set_query	1625	GLI4	0.9287	ARCHS4 Coexpression,0.9287
gene_set_query	1626	ZNF614	0.9291	GTEx Coexpression,0.9291
gene_set_query	1627	ZNF816	0.9415	GTEx Coexpression,0.9415
gene_set_query	1628	FLYWCH1	0.9508	GTEx Coexpression,0.9508
gene_set_query	1629	SKI	0.965	ARCHS4 Coexpression,0.965
gene_set_query	1630	SCRT1	0.9705	ARCHS4 Coexpression,0.9705
gene_set_query	1631	CC2D1A	0.973	ARCHS4 Coexpression,0.973
gene_set_query	1632	ZNF814	0.9751	GTEx Coexpression,0.9751

## Sheet: Integrated_topRank_NEPC_up
Query Name	Rank	TF	Score	Library	Overlapping_Genes
gene_set_query	1	CSRNP3	0.0006143	ARCHS4 Coexpression,6.143E-4	PGAP1,ATP8A2,ENO2,RIMS2,DPYSL5,TUBB3,DPYSL2,STMN1,NRCAM,BSN,UNC13A,CACNA2D1,LMO3,ANK2,OLFM1,DOK6,SCN8A,MAP1B,TAGLN3,KCTD16,BEX2,BEX1,STXBP1,MAP2,CAMTA1,MAP6,SCN3A,MARK1,SYT4,CADM1,SYT1,PBX1,DCLK1,GNAO1,REEP1,CCDC88A,PEX5L,RALYL,NBEA,PKIA,GABRB3,SNAP25,CNTNAP2,DOCK3,CELF3,CELF4,ELAVL4,ELAVL2,UNC80,UCHL1,TUBA1A,FSD1L,PCLO,CHL1,DLGAP1,CEP170,KIF1A,ERC2,SULT4A1,SVOP,ACTL6B,SGIP1,UBE2QL1,SEZ6L,PGM2L1,…
gene_set_query	2	ASCL1	0.0006223	GTEx Coexpression,6.223E-4	GABRB3,CSRNP3,NRSN1,ATP8A2,CELF3,STMN3,ABAT,CELSR3,DNER,PHACTR3,BAALC,NRCAM,KIF1A,CA8,HES6,KCNH3,UNC13A,KCNH6,ABCC8,KCNH8,APLP1,MANEAL,KSR2,CPT1C,RUNDC3A,POU3F2,AP3B2,SCG5,SCG3,DSCAML1,SCG2,STX1A,ASTN1,GNAZ,BEX2,BEX1,ICA1L,LYPD1,CRMP1,PHYHIPL,PTN,SEZ6L2,CXXC4,NOL4,PHF21B,JAKMIP2,DLL3,STOX2,NEUROD4,RASD1,GNG4,MAP6,CTNNA2,NLRP1,STOX1,PTPRN2,PCDH9,COL22A1,SCD5,TMEM61,MIAT,GDAP1,GNAO1,FAM155A,REEP2,R…
gene_set_query	3	MYT1	0.0007123	Enrichr Queries,7.123E-4	CLSTN2,STMN3,ABAT,CELSR3,RIMS2,SOX2,DACH1,CDH2,DPYSL5,TUBB3,DPYSL2,DPYSL3,NRCAM,BSN,EPHB1,CHGB,SOX5,KCNH2,CHRNB2,HES6,SRRM4,UNC13A,IGFBP5,DDX11,SEMA6D,LMO3,APLP1,CACNA2D3,CACNA2D2,ANK2,RUNDC3A,POU3F2,OLFM1,PCP4,GPRIN1,MAP1B,SCG5,TAGLN3,TOX,SCG2,ASTN1,CACNA1C,CPLX2,PHF21B,PLXNA2,CAMTA1,NPTX1,RHBDL3,SCN3A,SYT4,PTPRN2,CADM1,SYT1,NR2F1,FANCA,L1CAM,CORO2B,DCLK1,ST18,GNAO1,REEP1,LHX2,CPE,CDKN1C,GABRB3,…
gene_set_query	4	NHLH2	0.001229	ARCHS4 Coexpression,0.001229	GABRB3,CNTNAP2,CSRNP3,ONECUT2,CELF3,CELF4,ELAVL4,SOBP,ENO2,CELSR3,ELAVL2,ROBO1,ELAVL3,SMPD3,TUBA1C,UCHL1,TUBA1A,DACH1,DPYSL5,TUBB3,DPYSL2,DPYSL3,STMN1,DNER,CEP170,EPHB2,SRRM3,SRRM4,ACTL6B,CACNA2D1,APLP1,ISLR2,UBE2QL1,ANK2,MANEAL,MYT1,POU3F2,PGM2L1,FOXP2,TMEFF1,OLFM1,TOX3,TUBB2B,MAP1B,RBP1,DCX,AMPH,TAGLN3,INA,HCN3,BEX1,CRABP1,CRMP1,SEZ6L2,ADD2,PHF21B,DLL3,STOX2,GNG2,TMEM169,IGFBPL1,MAP2,SLC17A6,MA…
gene_set_query	5	CXXC4	0.001245	GTEx Coexpression,0.001245	GABRB3,CSRNP3,NRSN1,ATP8A2,CELF3,CELF4,ELAVL4,STMN3,ABAT,ELAVL2,SCAMP5,UCHL1,SALL2,TUBB3,DNER,KIF1A,ERC2,EID2B,CHRNB2,SVOP,ANK2,MANEAL,KSR2,SYP,SEZ6L,CPT1C,AP3B2,DNAJC6,SCG5,DCX,SCG3,TAGLN3,INA,SCG2,ASTN1,GNAZ,BEX2,BEX1,ICA1L,CRMP1,PHYHIPL,ZDHHC22,SEZ6L2,NOL4,JAKMIP2,STOX2,GNG4,SV2A,MAP2,CAMTA1,MAP6,NCAM1,SCN3A,VAT1L,PTPRN2,GAD1,CADPS,LSAMP,PNMA3,SYT13,GDAP1,GNAO1,FAM155A,RALYL,GLRB,SYT11,REEP2,C…
gene_set_query	6	NEUROD1	0.001425	Enrichr Queries,0.001425	RIMS2,SOX2,SCGN,DACH1,CDH2,TUBB3,DPYSL2,DPYSL3,NRCAM,SH3GL2,CHGB,SRRM4,IGFBP5,CACNA2D1,DDX11,LMO3,APLP1,ISL1,POU3F2,ADCYAP1,OLFM1,MAP1B,SCG5,AMPH,TAGLN3,SCG2,ATF3,STXBP1,CPLX2,EFNA5,IGSF21,TSPAN7,PLXNA2,NPTX1,PROM1,SCN3A,SYT4,TFAP2B,PTPRN2,CADM1,SYT1,NR2F1,ST18,GNAO1,RALYL,NBEA,LHX2,ID2,ID4,CPE,GABRB3,SNAP25,CNTNAP2,KCNC1,ONECUT2,CELF3,CELF4,ELAVL4,FMN2,ELAVL2,ROBO1,ELAVL3,UNC80,CALB2,UCHL1,PCLO,…
gene_set_query	7	PURG	0.001843	ARCHS4 Coexpression,0.001843	GABRB3,SEMA5B,PGAP1,CSRNP3,ATP8A2,DOCK3,CELF4,ELAVL4,ABAT,ENO2,ELAVL2,ROBO1,ELAVL3,SOX2,UCHL1,TUBA1A,PCLO,CDH2,FGF9,DPYSL5,CHL1,TUBB3,DPYSL3,STMN1,DNER,CEP170,NRCAM,ERC2,BSN,SRRM4,ACTL6B,SGIP1,ANK2,NAV1,SEZ6L,MYT1,POU3F2,PGM2L1,OLFM1,TOX3,TUBB2B,SCN8A,MAP1B,AMPH,TAGLN3,INA,NLGN1,BEX1,NRXN1,NRXN3,CRMP1,PHYHIPL,ADD2,AGPAT4,PHF21B,STOX2,GNG2,SV2A,MAP2,ADAM23,CHN1,SLITRK5,MAP6,NCAM1,CTNNA2,SCN3A,BEND…
gene_set_query	8	ZBTB8B	0.001867	GTEx Coexpression,0.001867	CSRNP3,NRSN1,ATP8A2,CELF3,CELF4,STMN3,GRIK1,ABAT,FMN2,SCAMP5,SOX2,UCHL1,TUBB3,DPYSL2,DNER,PHACTR3,BAALC,NRCAM,KIF1A,ERC2,APLP1,MANEAL,SEZ6L,CPT1C,RUNDC3A,AP3B2,DNAJC6,GPRIN1,DCX,SCG3,TAGLN3,DSCAML1,INA,ASTN1,GNAZ,BEX2,BEX1,CRMP1,PHYHIPL,PTN,ZDHHC22,SEZ6L2,CXXC4,NOL4,JAKMIP2,DLL3,GNG4,SV2A,MAP2,MAP6,CTNNA2,SCN3A,DTNA,PTPRN2,PCDH9,SCD5,CADPS,LSAMP,PNMA3,SYT13,GDAP1,GNAO1,FAM155A,RALYL,SYT11,REEP2,C…
gene_set_query	9	INSM1	0.002137	Enrichr Queries,0.002137	GFI1,CELSR3,RIMS2,SOX2,SCGN,DACH1,CDH2,DPYSL5,TUBB3,DPYSL2,DPYSL3,NRCAM,EPHB1,SH3GL2,CHGB,KCNH2,HES6,SRRM4,IGFBP5,CACNA2D3,ISL1,POU3F2,OLFM1,MAP1B,TAGLN3,KCTD12,TOX,SCG2,ATF3,CRABP1,LPL,CPLX2,EFNA5,PHF21B,IGSF21,PLXNA2,NPTX1,RHBDL3,PROM1,SCN3A,PRPH,SYT4,PTPRN2,CADM1,SYT1,NR2F1,BTBD11,DCLK1,ST18,GNAO1,LHX2,ID2,ID4,ID3,CDKN1C,GABRB3,SNAP25,CDKN1A,KCNC1,ONECUT2,CELF3,CHD7,CELF4,GRIK3,ELAVL4,ELAVL2,R…
gene_set_query	10	DACH2	0.002457	ARCHS4 Coexpression,0.002457	GABRB3,SNAP25,CNTNAP2,PGAP1,CSRNP3,ATP8A2,CELF3,CELF4,ELAVL4,FMN2,ENO2,ELAVL2,UNC80,RIMS2,SCGN,UCHL1,TUBA1A,PCLO,DPYSL5,DPYSL2,STMN1,NRCAM,ERC2,SH3GL2,UNC13A,SVOP,ACTL6B,ENTPD3,SGIP1,ABCC8,CACNA2D1,ANK2,KSR2,CPT1C,RUNDC3A,AP3B2,PGM2L1,DISP2,ADCYAP1,TUBB2B,DNAJC6,MAP1B,SCG3,AMPH,TAGLN3,ARHGEF7,INA,KCTD16,BEX2,BEX1,STXBP1,ICA1L,NRXN1,NRXN3,CRMP1,NOL4,ADD2,JAKMIP2,STOX2,GNG2,TMEM169,GNG4,SV2A,MAP2,M…
gene_set_query	11	CAMTA1	0.002489	GTEx Coexpression,0.002489	GABRB3,SNAP25,DOCK3,CELF4,STMN3,ELAVL3,SCAMP5,UNC80,TRIM9,SALL2,SCRN1,DPYSL2,DLGAP1,KIF1A,BSN,SULT4A1,EID2B,SH3GL2,CHRNB2,SVOP,ACTL6B,ANK2,SYP,SEZ6L,CPT1C,RUNDC3A,AP3B2,DNM1,RIPPLY2,DNAJC6,MAP1B,AMPH,TAGLN3,INA,ASTN1,CAMK2B,KCNA1,STXBP1,ICA1L,NRXN1,ADAM22,CRMP1,ADCY1,NOL4,ADD2,JAKMIP2,SV2B,SV2A,TSPAN7,RIMKLA,SCN3A,GPR158,CLVS1,SYT4,CA10,LSAMP,SYT13,NMNAT2,CORO2B,EFR3B,GDAP1,GNAO1,FAM155A,RALYL,GL…
gene_set_query	12	ST18	0.002849	Enrichr Queries,0.002849	PGAP1,CLSTN2,RIMS2,DACH1,CDH2,DPYSL2,SCN9A,NRCAM,EPHB1,CHGB,TNS1,SOX5,EPHA7,IGFBP5,CACNA2D1,KCNH8,DDX11,SEMA6D,LMO3,ANK2,ISL1,FOXP2,OLFM1,MAP1B,SCG5,TAGLN3,KCTD12,TOX,SCG2,ATF3,PHYHIPL,LPL,CPLX2,PLXNA2,NPTX1,SCN3A,SYT4,PTPRN2,CADM1,SYT1,DCLK1,GNAO1,PEX5L,RALYL,CNTN4,CDKN1C,GABRB3,SNAP25,CNTNAP2,CPM,CDKN1A,CELF3,CHD7,CELF4,ELAVL4,FMN2,ELAVL2,SYNE1,ROBO1,UNC80,PCLO,DNER,DLGAP1,KIF1A,DUSP4,NAV1,NAV2…
gene_set_query	13	REST	0.003111	GTEx Coexpression,0.003111	GABRB3,NRSN1,ATP8A2,CELF3,CELF4,STMN3,ELAVL3,SCAMP5,UNC80,TRIM9,SALL2,DPYSL2,KIF1A,BSN,SULT4A1,CHRNB2,UNC13A,SVOP,ACTL6B,ANK2,MANEAL,SYP,SEZ6L,CPT1C,RUNDC3A,AP3B2,SYN1,DNM1,RIPPLY2,GPRIN1,SCG3,AMPH,TAGLN3,INA,ASTN1,CAMK2B,GNAZ,BEX2,BEX1,STXBP1,CRMP1,ZDHHC22,SEZ6L2,NOL4,ADD2,JAKMIP2,PGBD5,SV2A,TSPAN7,CAMTA1,MAP6,SCN3A,GPR158,CLVS1,CADPS,LSAMP,SYT13,CORO2B,EFR3B,GDAP1,GNAO1,FAM155A,RALYL,SYT11,REEP…
gene_set_query	14	PCGF2	0.003367	ReMap ChIP-seq,0.003367	GFI1,IKZF3,ZDBF2,RIMS2,SOX2,DACH1,FGF9,SALL2,DPYSL5,TMOD1,EPHA7,ST6GAL2,LMO3,IGFBP2,MTUS2,ISL1,POU3F2,FOXP2,ADCYAP1,HOXB9,HOXB2,HOXB8,HOXB7,SKAP1,ATF3,HOXB6,HOXB5,ASTN1,DLX5,HOXD1,CTTNBP2,DLX6,TSHZ2,SLC6A20,EFNA5,PHF21B,NPC1L1,NKX2-1,PIP5K1B,DRD1,RHBDL3,PROM1,HOXC9,TFAP2B,DTNA,CADM1,NR2F1,DCDC2,GNAO1,LHX2,BAMBI,HOXD8,ITM2C,HRK,CLIC6,SFTA3,DOCK3,ONECUT2,CELF3,CHD7,CELF4,LPCAT1,HEPACAM2,FMN2,SOBP,T…
gene_set_query	15	MEIS2	0.003686	ARCHS4 Coexpression,0.003686	PGAP1,CSRNP3,CELF3,CHD7,ELAVL4,FMN2,CELSR3,ELAVL2,ROBO1,ELAVL3,UNC80,RIMS2,SCGN,TUBA1A,PCLO,DACH1,CDH2,SCRN1,DPYSL5,TUBB3,SGCB,DPYSL2,DPYSL3,REV3L,CEP170,CHGB,SOX5,TMOD1,CHRNB2,SRRM4,SVOP,ABCC8,CACNA2D1,ANK2,HLA-A,ISL1,MYT1,POU3F2,ADCYAP1,TOX3,TUBB2B,GPRIN1,MAP1B,RBP1,SCG5,DCX,TAGLN2,SCG3,INA,SCG2,BEX1,TULP4,CRMP1,KIAA1211,CACNA1C,CXXC4,NOL4,PHF21B,STOX2,IGFBPL1,MAP2,PLXNA2,MAP6,NCAM1,CTNNA2,SCN3…
gene_set_query	16	MYT1L	0.003734	GTEx Coexpression,0.003734	GABRB3,CSRNP3,NRSN1,CELF4,STMN3,SCAMP5,DLGAP1,KIF1A,ERC2,BSN,SULT4A1,CHRNB2,PRMT8,UNC13A,SVOP,ACTL6B,ANK2,SYP,CPT1C,SYN2,RUNDC3A,AP3B2,SYN1,DNM1,CIT,RIPPLY2,DNAJC6,GPRIN1,AMPH,TAGLN3,INA,ASTN1,CAMK2B,BEX2,BEX1,SEZ6,CRMP1,ADCY1,JAKMIP1,NOL4,ADD2,PGBD5,SV2A,MAP2,TSPAN7,CHN1,SLITRK5,CAMTA1,RIMKLA,SCN3A,GPR158,CLVS1,PTPRN2,SYT1,GAD1,LSAMP,NMNAT2,FBXL16,EFR3B,GDAP1,GNAO1,FAM155A,RALYL,GLRB,SYT11,REEP2
gene_set_query	17	ISL1	0.004274	Enrichr Queries,0.004274	ETS1,SOX2,DACH1,CDH2,FGF9,DPYSL2,PEG10,DPYSL3,CHGB,EPHA7,IGFBP5,SEMA6D,IGFBP2,ATP1B1,POU3F2,FOXP2,ADCYAP1,OLFM1,PCP4,MAP1B,SCG5,KCTD12,SCG2,ATF3,KHDRBS3,DLX5,CRABP1,EFNA5,TFAP2B,PTPRN2,CADM1,SYT1,NR2F1,PBX3,PBX1,LHX2,BAMBI,PKIA,ID2,ID1,ID4,ID3,CPE,TGFBI,FGFR2,ITM2C,CDKN1C,SNAP25,CDKN1A,ONECUT2,CELF4,ELAVL4,SIX1,ELAVL2,ROBO1,UCHL1,HEY1,SIX2,DNER,TIMP3,PROX1,DUSP6,ADRA2A,VCAN,KIT,ALDH1A1,INA,DDC,SA…
gene_set_query	18	ZNF536	0.0043	ARCHS4 Coexpression,0.0043	CSRNP3,CELF3,CELF4,ELAVL4,ABAT,ENO2,ELAVL2,ROBO1,ELAVL3,UCHL1,TUBA1A,DACH1,CDH2,DPYSL5,CHL1,TUBB3,DPYSL2,STMN1,DLGAP1,CEP170,KIF1A,ERC2,BSN,SULT4A1,CHRNB2,SRRM3,SVOP,ACTL6B,SGIP1,APLP1,ANK2,POU3F2,PGM2L1,TUBB2B,DNAJC6,MAP1B,DCX,AMPH,TAGLN3,PAFAH1B3,INA,PDZRN4,BEX1,DLX5,STXBP1,NRXN1,NRXN3,CRMP1,PHYHIPL,NOL4,ADD2,JAKMIP2,STOX2,GNG2,PNMA1,SV2A,MAP2,CAMTA1,MAP6,NCAM1,CTNNA2,SCN3A,GPM6B,RUNX1T1,CADM1,…
gene_set_query	19	SALL2	0.004356	GTEx Coexpression,0.004356	ATP8A2,KCNC1,KCNK9,CELF3,MAST1,CELF4,STMN3,GRIK2,ENO2,CELSR3,SYNE1,ELAVL3,SCAMP5,UNC80,TRIM9,TMEM145,PCLO,SCRN1,BSN,EID2B,SH3GL2,TRIM67,SRRM3,SRRM4,ACTL6B,ANK2,CPT1C,MYT1,AP3B2,DISP2,RIPPLY2,CAMK2B,KCNA1,STXBP1,ICA1L,SEZ6,ADAM22,NRXN3,CRMP1,CPLX2,ADD2,JAKMIP2,IGSF21,SV2A,CAMTA1,NPTX1,SCN3A,GPR158,SYT4,CA10,CADM1,LSAMP,NMNAT2,CORO2B,EFR3B,GDAP1,STXBP5L,GNAO1,RALYL,NBEA,SYT11,NOVA1,REEP2,CPE
gene_set_query	20	TEF	0.004978	GTEx Coexpression,0.004978	GABRB3,SNAP25,DOCK3,KCNC1,MAST1,CELF4,STMN3,GRIK2,ENO2,ELAVL3,SCAMP5,UNC80,TRIM9,PCLO,SALL2,BSN,EID2B,SH3GL2,CHRNB2,SRRM3,SRRM4,PRMT8,UNC13A,SVOP,ACTL6B,ANK2,CPT1C,RUNDC3A,AP3B2,DNM1,DISP2,RIPPLY2,TAGLN3,CAMK2B,KCNA1,STXBP1,ICA1L,NRXN1,SEZ6,ADAM22,NRXN3,CRMP1,ADCY1,CPLX2,ADD2,IGSF21,PGBD5,SV2B,SV2A,TSPAN7,CAMTA1,GPR158,CLVS1,CA10,NMNAT2,L1CAM,CORO2B,EFR3B,GDAP1,STXBP5L,RALYL,PER3,NBEA,REEP2
gene_set_query	21	ZFP28	0.005528	ARCHS4 Coexpression,0.005528	GABRB3,PGAP1,CSRNP3,ATP8A2,CELF4,ELAVL4,FMN2,ENO2,ELAVL2,ELAVL3,TRIM9,UCHL1,TUBA1A,PCLO,CDH2,DPYSL5,CHL1,TUBB3,SGCB,DPYSL2,PEG10,DPYSL3,STMN1,DNER,DLGAP1,CEP170,NRCAM,ERC2,SH3GL2,KLF12,UNC13A,SVOP,ACTL6B,ELOVL4,SGIP1,CACNA2D1,ANK2,SEZ6L,CPT1C,PGM2L1,TUBB2B,DNAJC6,MAP1B,DCX,SCG3,AMPH,TAGLN3,INA,NLGN1,BEX2,BEX1,PPM1L,STXBP1,ICA1L,NRXN3,CRMP1,CACNA1C,STOX2,GNG2,PNMA1,SV2A,MAP2,MAP6,NCAM1,CTNNA2,SCN3…
gene_set_query	22	PRDM12	0.0056	GTEx Coexpression,0.0056	GABRB3,CSRNP3,NRSN1,CELF4,ELAVL4,STMN3,SCAMP5,UCHL1,TUBB3,KIF1A,ERC2,SULT4A1,EID2B,CHRNB2,SVOP,ACTL6B,ANK2,MANEAL,SYP,SEZ6L,CPT1C,SYN2,RUNDC3A,AP3B2,SYN1,DNM1,RIPPLY2,DNAJC6,GPRIN1,DCX,SCG3,AMPH,TAGLN3,INA,ASTN1,BEX2,BEX1,CRMP1,PHYHIPL,ZDHHC22,NOL4,ADD2,PGBD5,SV2A,MAP2,TSPAN7,CAMTA1,SCN3A,VAT1L,CLVS1,PTPRN2,GAD1,CADPS,LSAMP,PNMA3,SYT13,GDAP1,GNAO1,FAM155A,RALYL,GLRB,REEP2
gene_set_query	23	NHLH1	0.005698	Enrichr Queries,0.005698	CDKN1C,SNAP25,CDKN1A,KCNC1,ONECUT2,GFI1,CELF3,ELAVL4,ELAVL2,ELAVL3,SMPD3,SOX2,DACH1,HEY1,ZIC2,DPYSL5,TUBB3,DPYSL2,DPYSL3,HEY2,DNER,NRCAM,TEAD1,CHGB,SOX5,DUSP4,HES6,SRRM4,IGFBP5,IGFBP2,SYP,PROX1,ISL1,RUNDC3A,POU3F2,DUSP6,OLFM1,VCAN,TUBB2B,MAP1B,KIT,DCX,TAGLN3,INA,SCG2,ATF3,RGS16,CRABP1,LYPD1,CRMP1,CXCR4,ASCL1,CPLX2,TMEM163,DLL1,ADD2,PHF21B,DLL3,NEUROD4,IGFBPL1,FRZB,MGAT5B,PLXNA2,NCAM1,RHBDL3,SCN3A…
gene_set_query	24	MTF2	0.006098	Literature ChIP-seq,0.006098	APP,LPGAT1,CERK,GFI1,ZDHHC2,IKZF3,ANTXR1,GLDN,UBASH3B,RASSF5,CPNE2,BSN,EPHB2,EPHB1,BVES,IER5,MFSD2A,HES6,EPHA7,ST6GAL2,CACNA2D1,CACNA2D3,CACNA2D2,ISLR2,ISL1,RUNX1,HOXB9,TCERG1L,HECW2,HOXB2,FAR2,KCTD12,HOXB8,TRIB2,HOXB7,ATF3,HOXB6,HOXB5,ASTN1,HOXD1,SLC35D3,CRABP1,TSHZ2,LYPD1,TMTC1,PCDH18,NKAIN2,CYB5R4,NUAK1,PGBD5,CHST11,ADAMTS18,RDH10,NKX2-1,PIP5K1B,RHBDL3,PROM1,HOXC9,GPM6B,CADM1,LRRN2,MCAM,NR2F1,…
gene_set_query	25	FOXD4L3	0.006223	GTEx Coexpression,0.006223	GABRB3,SNAP25,MAST1,CELF4,STMN3,ELAVL3,SCAMP5,DLGAP1,KIF1A,ERC2,BSN,SULT4A1,SH3GL2,CHRNB2,KCNH3,UNC13A,SVOP,ACTL6B,ANK2,SYP,SEZ6L,CPT1C,SYN2,RUNDC3A,AP3B2,SYN1,DNM1,CIT,OLFM1,RIPPLY2,SCN8A,GPRIN1,AMPH,TAGLN3,STX1A,ASTN1,CAMK2B,STXBP1,CRMP1,ADCY1,ZDHHC22,CPLX2,ADD2,IGSF21,PGBD5,SV2B,SV2A,TSPAN7,CHN1,CAMTA1,RIMKLA,CLVS1,SYT1,SYT13,NMNAT2,CORO2B,GDAP1,NELL2,GNAO1,RALYL,GLRB,REEP2
gene_set_query	26	INSM2	0.00641	Enrichr Queries,0.00641	RET,GABRB3,SNAP25,CDKN1A,NRSN1,KCNC1,ONECUT2,CLSTN2,CELF4,GRIK3,ELAVL4,CELSR3,ELAVL2,RIMS2,TRIM9,DACH1,FGF9,DPYSL5,DPYSL2,HEY2,GRM8,DNER,DLGAP1,NRCAM,ERC2,BSN,EPHB1,TRIM67,CHGB,CHRNB2,HES6,SRRM4,PRMT8,DDX11,CACNA2D3,ISLR2,PROX1,SEZ6L,ISL1,POU3F2,AP3B2,ADRA2A,TCERG1L,TOX,INA,SCG2,ATF3,CAMK2B,SATB1,SLC35D3,NRXN1,CRABP1,SEZ6,NRXN3,CRMP1,CXCR4,LRP2,ADCY1,ASCL1,CPLX2,EFNA5,NOL4,IGSF21,RASD1,MGAT5B,SLC…
gene_set_query	27	SOX2	0.006734	ReMap ChIP-seq,0.006734	ENO2,SMC4,SOX2,CDH2,SALL2,PTTG1,DPYSL5,STMN1,COTL1,NRCAM,KNTC1,IER5,LZTS1,SRRM4,S100A2,IGFBP2,POU3F2,MAP1B,SPARCL1,TAGLN3,TOX,TRIB2,SCG2,CRABP1,NCAPG,TNFRSF11B,EFNA5,PCDH18,CORO1C,CNN3,NUAK1,MAP2,MIER1,MBIP,PLXNA2,PIP5K1B,MARK1,AKIRIN2,CBX5,LRRN3,POLR3GL,GADD45A,NR2F1,PBX3,PBX1,TPX2,KIF18A,ID2,UBE2T,ID1,ECHDC1,ID3,CALM2,PAM,FGFR2,NRP2,CELF3,HMGB2,SIPA1L2,PHTF1,CKS1B,LFNG,TUBA1C,TUBA1A,ZIC2,TMSB4X…
gene_set_query	28	ZNF25	0.006757	ARCHS4 Coexpression,0.006757	SNAP25,CSRNP3,ATP8A2,DOCK3,ELAVL4,FRY,ENO2,SCAMP5,UNC80,UCHL1,TUBA1A,PCLO,DPYSL5,CHL1,DNER,DLGAP1,NRCAM,KIF1A,ERC2,BSN,SULT4A1,SH3GL2,UNC13A,SVOP,ACTL6B,SGIP1,CACNA2D1,APLP1,ANK2,SYP,SEZ6L,SYN2,RUNDC3A,PGM2L1,SYN1,DNM1,OLFM1,TUBB2B,DNAJC6,DOK6,SCN8A,SPARCL1,AMPH,TAGLN3,RAPGEF5,INA,KCTD16,CAMK2B,BEX1,PPM1L,STXBP1,ADAM22,NRXN3,CRMP1,PHYHIPL,ADCY1,CPLX2,NOL4,GNG2,PNMA1,SV2B,SV2A,MAP2,CHN1,NCAM1,CTNN…
gene_set_query	29	SOX3	0.006845	GTEx Coexpression,0.006845	CSRNP3,NRSN1,CELF3,STMN3,ABAT,FMN2,SOX2,UCHL1,FSD1L,TUBB3,STMN1,DNER,PHACTR3,BAALC,KIF1A,HES6,PCYT1B,APLP1,MANEAL,SEZ6L,CPT1C,POU3F2,ASRGL1,TMEFF1,GPRC5B,TUBB2B,SCG5,SCG3,DSCAML1,SCG2,ASTN1,BEX2,BEX1,LYPD1,CRMP1,PHYHIPL,PTN,ZDHHC22,CXXC4,NOL4,DLL3,GNG4,MAP6,CTNNA2,SCN3A,STOX1,GPM6B,DTNA,PTPRN2,SCD5,LSAMP,PNMA3,GDAP1,GNAO1,FAM155A,CCDC88A,REEP2,CPE,FAM171B,CALM2,ITM2C
gene_set_query	30	ONECUT2	0.007371	ARCHS4 Coexpression,0.007371	GABRB3,CSRNP3,ATP8A2,CELF3,CELF4,ELAVL4,SOBP,CELSR3,ELAVL2,ROBO1,ELAVL3,SMPD3,UCHL1,TUBA1A,DACH1,DPYSL5,TUBB3,DPYSL2,DPYSL3,SCN9A,STMN1,CEP170,SRRM3,SRRM4,CACNA2D1,SEMA6D,ISLR2,UBE2QL1,ANK2,MANEAL,MYT1,PGM2L1,TMEFF1,ADCYAP1,TUBB2B,GPRIN1,MAP1B,RBP1,DCX,TAGLN3,INA,HOXB5,HCN3,BEX2,CHRNA3,KHDRBS3,BEX1,CRABP1,CRMP1,KIAA1211,SEZ6L2,CXXC4,PHF21B,DLL3,CECR2,STOX2,TMEM169,IGFBPL1,SV2A,MAP2,SLC17A6,MAP6,N…
gene_set_query	31	ZNF667	0.007467	GTEx Coexpression,0.007467	GABRB3,CSRNP3,NRSN1,ATP8A2,DOCK3,CELF3,CELF4,STMN3,CELSR3,SCAMP5,UNC80,UCHL1,PEG10,KIF1A,EID2B,CHGB,CHRNB2,UNC13A,SVOP,ACTL6B,KCNH8,MANEAL,KSR2,CPT1C,RUNDC3A,AP3B2,RIPPLY2,ARMCX2,SCG5,TAGLN3,DSCAML1,INA,SCG2,STX1A,ASTN1,GNAZ,BEX2,BEX1,ICA1L,CRMP1,SEZ6L2,CXXC4,NOL4,PHF21B,JAKMIP2,STOX2,NEUROD4,GNG4,MAP6,NLRP1,SCN3A,PTPRN2,COL22A1,CADPS,MIAT,GDAP1,GNAO1,FAM155A,REEP2,RIMBP2,INSM1
gene_set_query	32	SCRT1	0.007835	Enrichr Queries,0.007835	HRK,RET,SNAP25,CDKN1A,NRSN1,KCNC1,ONECUT2,PLXND1,CELF3,CELF4,GRIK3,ELAVL4,STMN3,ENO2,CELSR3,ELAVL2,ELAVL3,SMPD3,RIMS2,TRIM9,TMEM145,FGF9,DPYSL5,CRTAC1,TUBB3,DPYSL2,DNER,KIF1A,BSN,SULT4A1,TRIM67,CHGB,KCNH2,CHRNB2,KCNH3,SRRM3,SRRM4,PRMT8,UNC13A,SVOP,ACTL6B,APLP1,ISLR2,SEZ6L,RUNDC3A,POU3F2,AP3B2,ADRA2A,DISP2,OLFM1,DNAJC6,GPRIN1,CHST1,INA,SCG2,CAMK2B,KCNA1,NRXN1,SEZ6,CRMP1,ADCY1,ASCL1,CPLX2,IGSF21,GN…
gene_set_query	33	ZSCAN1	0.00809	GTEx Coexpression,0.00809	GABRB3,CSRNP3,NRSN1,ATP8A2,DOCK3,CELF3,CELF4,STMN3,OGDHL,ABAT,CELSR3,SCAMP5,UNC80,UCHL1,KIF1A,EID2B,CHRNB2,UNC13A,SVOP,ACTL6B,MANEAL,KSR2,SYP,CPT1C,RUNDC3A,AP3B2,SCG5,SCG3,TAGLN3,INA,SCG2,STX1A,ASTN1,BEX2,BEX1,ICA1L,CRMP1,SEZ6L2,CXXC4,NOL4,PHF21B,DLL3,STOX2,GNG4,SV2A,FAM184A,MAP6,NLRP1,SCN3A,PTPRN2,CADM1,CADPS,PNMA3,SYT13,MIAT,GDAP1,GNAO1,FAM155A,REEP2,RIMBP2,INSM1
gene_set_query	34	POU3F2	0.008547	Enrichr Queries,0.008547	SNAP25,CNTNAP2,CDKN1A,ONECUT2,GRIK3,SLC35F1,FMN2,ELAVL2,ROBO1,SOX2,TRIM9,DACH1,HEY1,ZIC2,CDH2,DPYSL5,DPYSL2,PEG10,HEY2,DNER,NRCAM,EPHB1,TEAD1,SOX5,EPHA7,IGFBP5,DDX11,SEMA6D,IGFBP2,PROX1,ISL1,DUSP6,FOXP2,TOX3,VCAN,TUBB2B,MMP16,MAP1B,DCX,TAGLN3,TOX,TRIB2,INA,NLGN1,SATB1,SEMA3A,NRXN1,LYPD1,NRXN3,CRMP1,CXCR4,PTN,ASCL1,EFNA5,CXXC4,NOL4,DLL1,PLXNA2,SLITRK5,NCAM1,NPTX1,SLIT2,GPM6B,RUNX1T1,RPRM,SYT4,TFAP…
gene_set_query	35	EBF3	0.0086	ARCHS4 Coexpression,0.0086	CSRNP3,ONECUT2,CELF3,CELF4,ELAVL4,STMN3,SOBP,TSPAN11,CELSR3,ELAVL2,ROBO1,ELAVL3,SMPD3,UCHL1,TUBA1A,DACH1,DPYSL5,TUBB3,PEG10,SIX2,DPYSL3,STMN1,DNER,CEP170,KIF1A,EPHB2,TRIM67,SRRM3,CACNA2D1,APLP1,UBE2QL1,ANK2,MYT1,POU3F2,PGM2L1,FOXP2,TMEFF1,TUBB2B,GPRIN1,MAP1B,DCX,TAGLN3,TRIB2,INA,IGSF3,CRMP1,KIAA1211,PTN,SEZ6L2,AGPAT4,PHF21B,STOX2,SERTAD4,GNG2,TMEM169,IGFBPL1,SV2A,MAP2,SLC17A6,MAP6,NCAM1,CTNNA2,RH…
gene_set_query	36	POU6F1	0.008712	GTEx Coexpression,0.008712	SNAP25,DOCK3,KCNC1,CNRIP1,MAST1,CELF4,STMN3,GRIK2,ENO2,ELAVL3,SCAMP5,UNC80,TRIM9,PCLO,SALL2,SCRN1,DLGAP1,BSN,EID2B,SH3GL2,SRRM3,SRRM4,UNC13A,SVOP,ACTL6B,ANK2,CPT1C,RUNDC3A,AP3B2,SYN1,DNM1,DISP2,RIPPLY2,AMPH,CAMK2B,KCNA1,STXBP1,ICA1L,NRXN1,SEZ6,ADAM22,NRXN3,CRMP1,ADCY1,CPLX2,ADD2,IGSF21,SV2B,SV2A,CAMTA1,GPR158,CA10,NMNAT2,L1CAM,CORO2B,STXBP5L,RALYL,NBEA,NOVA1,REEP2,SERGEF
gene_set_query	37	ZNF248	0.009214	ARCHS4 Coexpression,0.009214	PGAP1,CSRNP3,ATP8A2,DOCK3,CELF3,CELF4,ELAVL4,FMN2,ENO2,ELAVL2,ELAVL3,UNC80,UCHL1,TUBA1A,PCLO,DPYSL5,CHL1,TUBB3,DPYSL2,STMN1,DLGAP1,CEP170,NRCAM,ERC2,CHRNB2,SVOP,ACTL6B,SGIP1,SEMA6D,ISLR2,ANK2,PGM2L1,DISP2,TUBB2B,SCN8A,MAP1B,TAGLN2,AMPH,TAGLN3,INA,BEX2,BEX1,DLX5,STXBP1,ICA1L,NRXN1,TULP4,NRXN3,CRMP1,PHYHIPL,CXXC4,NOL4,ADD2,STOX2,GNG2,TMEM169,SV2A,MAP2,MAP6,NCAM1,CTNNA2,SCN3A,RUNX1T1,CADM1,PCDH9,GAD…
gene_set_query	38	LIN28B	0.009259	Enrichr Queries,0.009259	GABRB3,TOP2A,CNTNAP2,CDKN1A,ONECUT2,CHD7,KIF14,SLC35F1,ELAVL2,ROBO1,SOX2,DACH1,ZIC2,CDH2,SALL2,DPYSL5,DPYSL2,PEG10,DPYSL3,HEY2,TIMP3,KIF1A,BVES,EPHA7,IGFBP5,IGFBP2,TET1,NAV1,PROX1,DUSP6,TOX3,VCAN,DEPDC1B,TUBB2B,MAP1B,KIT,DCX,TNIK,DTL,ATF3,SATB1,SEMA3A,CRABP1,CDCA7,NRXN3,CRMP1,CXCR4,TTK,LRP2,EFNA5,CXXC4,PHF21B,CECR2,GNG4,GPC3,PMAIP1,SLIT2,PROM1,GPC6,BUB1,E2F7,VAT1L,RUNX1T1,RPRM,CADM1,SYT1,EYA1,UBE…
gene_set_query	39	HSFY2	0.009334	GTEx Coexpression,0.009334	SNAP25,DOCK3,KCNC1,KCNK9,MAST1,CELF4,GRIK2,ENO2,CELSR3,ELAVL3,SCAMP5,UNC80,TRIM9,TMEM145,PCLO,ZIC2,FGF9,SCRN1,BSN,EID2B,SH3GL2,TRIM67,SRRM3,SRRM4,ACTL6B,ANK2,MYT1,AP3B2,DNM1,DISP2,TIAM1,RIPPLY2,GPRIN1,MAP1B,AMPH,CAMK2B,KCNA1,STXBP1,ICA1L,ADAM22,NRXN3,ADCY1,CPLX2,ADD2,IGSF21,SV2B,SV2A,CAMTA1,NPTX1,GPR158,CLVS1,SYT4,CA10,ZIC5,NMNAT2,L1CAM,STXBP5L,RALYL,NBEA,NOVA1,REEP2
gene_set_query	40	ZNF804A	0.009828	ARCHS4 Coexpression,0.009828	PGAP1,CSRNP3,ATP8A2,DOCK3,CELF3,CELF4,ELAVL4,SOBP,ELAVL2,ROBO1,ELAVL3,UCHL1,TUBA1A,FSD1L,PCLO,DPYSL5,CHL1,TUBB3,DPYSL2,STMN1,DNER,DLGAP1,CEP170,ERC2,SOX5,CHRNB2,SRRM3,SGIP1,CACNA2D1,ANK2,NAV1,MYT1,POU3F2,PGM2L1,ZDHHC15,TUBB2B,KATNAL1,DNAJC6,DOK6,SCN8A,MAP1B,DCX,TAGLN3,INA,KCTD16,HCN3,NLGN1,NRXN1,CRMP1,ADD2,STOX2,GNG2,CNR1,SV2A,MAP2,ADAM23,PLXNA2,CAMTA1,SLC17A6,MAP6,NCAM1,CTNNA2,SCN3A,RUNX1T1,LRRN…
gene_set_query	41	POU6F2	0.009972	Enrichr Queries,0.009972	GABRB3,CNTNAP2,CSRNP3,ATP8A2,ONECUT2,CLSTN2,CELF4,GRIK3,XYLT1,FMN2,ELAVL2,SYNE1,ROBO1,RIMS2,PCLO,DACH1,CDH2,DPYSL2,GRM8,DNER,DLGAP1,NRCAM,ERC2,EPHB1,SH3GL2,SOX5,EPHA7,CACNA2D1,KCNH8,DDX11,SEMA6D,CACNA2D3,MTUS2,NAV2,PROX1,POU3F2,FOXP2,RUNX1,SETBP1,TCERG1L,CNKSR3,TOX,NLGN1,SLC24A3,SATB1,SEMA3A,NRXN1,TSHZ2,GLIS3,NRXN3,TMTC1,CACNA1C,ADCY1,EFNA5,CXXC4,NOL4,NKAIN2,SV2B,ZMAT4,PLXNA2,CAMTA1,GPC5,SLIT2,CT…
gene_set_query	42	NANOG	0.0101	ReMap ChIP-seq,0.0101	SFTA3,ONECUT2,CHD7,CELF4,SIX1,ETS1,ENO3,ELAVL2,LMNB1,CKS1B,ZDBF2,SOX2,LAPTM4B,ZIC2,SALL2,HEY2,REV3L,IER5,TEAD1,DUSP4,ST6GAL2,CACNA2D1,SEMA6D,TET1,PROX1,ISL1,POU3F2,DUSP6,ETV5,TOX3,GPRC5B,VCAN,HOXB9,HOXB2,HOXB8,TOX,HOXB7,HOXB6,HOXB5,RNASEH2A,DLX5,HOXD1,DLX6,SEZ6,CRMP1,HOXD13,ASCL1,HOXD11,PCDH18,HOXD10,CNN3,ADD2,PHF21B,DLL4,NUAK1,NKX2-1,SLITRK5,PMAIP1,FYN,GPC4,HOXC9,GPC6,RUNX1T1,RPRM,STRA6,TFAP2B,P…
gene_set_query	43	AIRE	0.01058	GTEx Coexpression,0.01058	CNTNAP2,CSRNP3,NRSN1,CELF4,ELAVL4,STMN3,GRIK1,SLC35F1,ELAVL2,UCHL1,TUBA1A,TUBB3,DPYSL2,DNER,BAALC,KIF1A,SULT4A1,CHRNB2,MANEAL,SYP,SEZ6L,PGM2L1,SYN1,TMEFF1,ADCYAP1,DNAJC6,DCX,CHST1,TAGLN3,INA,SCG2,ASTN1,BEX2,BEX1,PHYHIPL,ZDHHC22,JAKMIP1,CXXC4,DLL3,GNG4,SV2A,MAP2,SLC17A6,MAP6,SCN3A,VAT1L,PTPRN2,GAD1,CADPS,LSAMP,OPRK1,PNMA3,SYT13,GDAP1,DCLK1,GNAO1,FAM155A,RALYL,REEP2,ITM2C
gene_set_query	44	NEUROD6	0.01068	Enrichr Queries,0.01068	GABRB3,SNAP25,NRSN1,RASL11B,CLSTN2,CELF4,ELAVL4,ELAVL2,ROBO1,CALB2,SOX2,UCHL1,PCLO,DACH1,DPYSL2,DPYSL3,DLGAP1,NRCAM,ERC2,BSN,SULT4A1,CHGB,SOX5,DUSP4,SRRM4,ACTL6B,LMO4,CACNA2D1,DDX11,LMO3,CACNA2D3,ISLR2,SYP,PROX1,SEZ6L,SYN2,POU3F2,DUSP6,ADCYAP1,OLFM1,PCP4,GPRIN1,MAP1B,KIT,DCX,TAGLN3,INA,SCG2,STX1A,CAMK2B,KHDRBS3,NRXN1,SEZ6,NRXN3,CRMP1,ADCY1,CPLX2,PPM1E,NOL4,IGSF21,GNG2,SV2B,CHN1,PLXNA2,SLC17A6,NPT…
gene_set_query	45	PBX3	0.01106	ARCHS4 Coexpression,0.01106	PGAP1,CSRNP3,CELF3,CELF4,ELAVL4,SOBP,ENO2,CELSR3,ELAVL2,ROBO1,ELAVL3,CALB2,UCHL1,TUBA1A,DACH1,CDH2,DPYSL5,CHL1,TUBB3,PEG10,DPYSL3,STMN1,DNER,CEP170,NRCAM,EPHB2,TRIM67,SRRM4,ACTL6B,CACNA2D1,APLP1,MYT1,POU3F2,PGM2L1,FOXP2,TMEFF1,TUBB2B,MAP1B,TAGLN3,PAFAH1B3,TRIB2,INA,RGS17,HCN3,BEX1,PPM1L,TSHZ2,CRMP1,KIAA1211,CXXC4,PHF21B,JAKMIP2,STOX2,SERTAD4,GNG2,TMEM169,IGFBPL1,PNMA1,MAP2,SLC17A6,MAP6,NCAM1,CTNN…
gene_set_query	46	ZNF365	0.0112	GTEx Coexpression,0.0112	GABRB3,CNTNAP2,CSRNP3,NRSN1,CELF4,ELAVL4,STMN3,SCAMP5,DLGAP1,NRCAM,KIF1A,SAMD12,ERC2,SULT4A1,CHRNB2,KCNH3,PRMT8,CAMK1D,SVOP,LMO4,SYP,SYN2,RUNDC3A,SYN1,AJAP1,CIT,TMEFF1,OLFM1,DNAJC6,DCX,SCG3,TAGLN3,INA,KCTD16,ASTN1,PHYHIPL,ZDHHC22,JAKMIP1,PGBD5,SV2A,MAP2,MGAT5B,TSPAN7,CHN1,SLITRK5,CTNNA2,RIMKLA,PCDH9,SYT1,PCDH8,B3GAT1,SYT13,GDAP1,NELL2,GNAO1,NELL1,FAM155A,GLRB,SYT11,CBLN2
gene_set_query	47	NEUROD4	0.0114	Enrichr Queries,0.0114	SNAP25,SEMA5B,CDKN1A,NRSN1,KCNC1,ONECUT2,CELF3,CELF4,GRIK3,ELAVL4,SIX1,ELAVL2,ROBO1,ELAVL3,SOX2,DACH1,TUBB3,DPYSL2,NRCAM,EPHB1,CHGB,SOX5,HES6,SRRM4,PRMT8,DDX11,SEMA6D,LMO3,SYP,PROX1,ISL1,POU3F2,ADCYAP1,OLFM1,CDHR1,DCX,TAGLN3,INA,SCG2,ASTN1,CHRNA3,NRXN1,CRABP1,SEZ6,NRXN3,CRMP1,PHYHIPL,CXCR4,PTN,ASCL1,CPLX2,EFNA5,DLL1,DLL3,IGFBPL1,PLXNA2,SLC17A6,NCAM1,NPTX1,CTNNA2,RHBDL3,SCN3A,CLVS1,RUNX1T1,RPRM,CH…
gene_set_query	48	ZFHX4	0.01167	ARCHS4 Coexpression,0.01167	CNTNAP2,PGAP1,CSRNP3,CELF3,CHD7,CELF4,ELAVL4,SLC35F1,SOBP,ENO2,ELAVL2,ELAVL3,UCHL1,TUBA1A,FSD1L,CSRP2,DACH1,ZIC2,CDH2,DPYSL5,TUBB3,DPYSL2,DPYSL3,STMN1,DNER,CEP170,EPHB2,EPHB1,EPHA7,ISLR2,NAV1,CPT1C,MYT1,POU3F2,PGM2L1,ENAH,TOX3,TUBB2B,MAP1B,DCX,TAGLN2,AMPH,TAGLN3,PAFAH1B3,INA,NLGN1,BEX1,CRMP1,EFNA5,CXXC4,PHF21B,JAKMIP2,STOX2,TMEM169,MAP2,SLC17A6,MAP6,NCAM1,CTNNA2,SCN3A,BEND5,RUNX1T1,CBX5,CADM1,LRR…
gene_set_query	49	ZNF540	0.01182	GTEx Coexpression,0.01182	GABRB3,ATP8A2,DOCK3,CELF3,MAST1,CELF4,STMN3,GRIK2,ENO2,CELSR3,SYNE1,ELAVL3,SCAMP5,UNC80,TRIM9,PCLO,SALL2,BSN,EID2B,SH3GL2,SRRM3,SRRM4,UNC13A,ACTL6B,ABCC8,ANK2,KSR2,CPT1C,MYT1,AP3B2,DISP2,RIPPLY2,SCG5,AMPH,CAMK2B,BEX2,BEX1,STXBP1,ICA1L,SEZ6,ADAM22,CRMP1,SEZ6L2,NOL4,ADD2,STOX2,SV2A,CAMTA1,MAP6,SCN3A,GPR158,SYT4,CA10,NMNAT2,GDAP1,STXBP5L,FAM155A,RALYL,NBEA,REEP2
gene_set_query	50	ZMAT4	0.01211	Enrichr Queries,0.01211	GABRB3,CNTNAP2,SEMA5B,NRSN1,ATP8A2,RASL11B,CLSTN2,CELF4,ELAVL2,ROBO1,RIMS2,TRIM9,PCLO,CDH2,DPYSL2,DNER,DLGAP1,NRCAM,KIF1A,ERC2,EPHB1,SH3GL2,CHGB,SOX5,DUSP4,EPHA7,PRMT8,UNC13A,CAMK1D,IGFBP5,CACNA2D1,CACNA2D3,NAV2,DUSP6,OLFM1,TOX3,GPRC5B,PCP4,KIT,AMPH,TOX,INA,ITGA9,CAMK2B,NLGN1,SLC24A3,NRXN1,CRABP1,NRXN3,CRMP1,LPL,ADCY1,EFNA5,IGSF21,SV2B,PLXNA2,NCAM1,NPTX1,SLIT2,CTNNA2,GPR158,VAT1L,RUNX1T1,RPRM,CHG…
gene_set_query	51	POU3F4	0.01229	ARCHS4 Coexpression,0.01229	SEMA5B,CSRNP3,CELF3,CHD7,ELAVL4,ABAT,TSPAN11,ELAVL2,ROBO1,ELAVL3,TMEM47,SOX2,TUBA1A,FSD1L,CSRP2,DACH1,CDH2,DPYSL5,TUBB3,DPYSL2,PEG10,DPYSL3,STMN1,CEP170,EPHB2,EPHB1,SRRM4,ACTL6B,POU3F2,FOXP2,TMEFF1,TOX3,TUBB2B,MAP1B,DCX,TAGLN3,PAFAH1B3,TRIB2,INA,BEX1,DLX5,LYPD1,NRXN3,CRMP1,PHYHIPL,PTN,CXXC4,PHF21B,JAKMIP2,STOX2,GNG2,TMEM169,PNMA1,MAP2,MAP6,NCAM1,CTNNA2,SCN3A,GPM6B,RUNX1T1,CBX5,LRRN3,PCDH8,H3F3A,N…
gene_set_query	52	DACH1	0.0129	ARCHS4 Coexpression,0.0129	CNTNAP2,PGAP1,CSRNP3,ONECUT2,CELF3,CHD7,ELAVL4,TSPAN11,CELSR3,ELAVL2,ELAVL3,SOX2,TUBA1A,FSD1L,CDH2,FGF9,DPYSL5,TUBB3,DPYSL2,DPYSL3,STMN1,EPHB2,CHGB,EPHA7,SEZ6L,ISL1,MYT1,POU3F2,FOXP2,TMEFF1,TOX3,TUBB2B,MAP1B,SCG5,DCX,SCG3,TAGLN3,INA,SCG2,BEX2,BEX1,PPM1L,CRMP1,EFNA5,CXXC4,NOL4,ADD2,PHF21B,JAKMIP2,STOX2,GNG2,TMEM169,IGFBPL1,GNG4,MAP2,SLC17A6,MAP6,NCAM1,CTNNA2,RHBDL3,SCN3A,MARK1,PTPRN2,CBX5,CADM1,H3…
[truncated: 1,580 more rows]
